# Supplementary material
Source: PubMed Central journal article supplement (PMC6400474)

## SUPPLEMENTAL MATERIAL

### Supplemental Methods

#### Machine learning analyses:

In the gradient boosting machine model, the dataset was split into three parts: training (60%), validation (20%), and a test set (20%). The GBM model was then trained using the default parameters of the machine learning platform (H2O 3.10.4.1): maximum number of trees (number of gradient boosting iterations): 50; maximum tree depth (number of interactions between variables in each tree): 5; learning rate: 0.1. Learning rate is used for reducing the impact of each consecutive tree to control for unstable iterations that may affect the accuracy of the model.<sup>1</sup> Performance was assessed by the receiver operating characteristic area under the curve (ROC-AUC), and error was assessed by the mean squared error (MSE).

#### Genotyping, quality control, and imputation:

The quality control (QC), phasing, and imputation was performed centrally and has been described in detail previously.<sup>2</sup> In brief, the release included 488,377 samples genotyped on the Applied Biosystems UK BiLEVE Axiom Array or the Applied Biosystems UK Biobank Axiom Array. After applied QC filters, a total of 487,442 samples and 670,739 autosomal markers were phased and used in imputation with a combined reference panel of the Haplotype Reference Consortium (HRC) 1.1, UK10K, and the 1000 Genomes Phase 3 panel. We included 10,972,370 markers belonging to the HRC 1.1 subset with a minor allele count  $\geq 20$  in cases and controls and MaCH  $r^2 \geq 0.8$ . In order to select for unrelated adults of European ancestry, individuals were removed based on genetic relatedness and were included if they self-reported as being white British, followed by confirmation of their ancestral background by principal components analysis. A sample of 337,536 individuals remained for analysis.

#### Pathway and functional analysis:

For functional annotation, FUMA<sup>3</sup> (Functional Mapping and Annotation of Genome-wide association studies) and DEPICT<sup>4</sup> (Data-driven Expression Prioritized Integration for Complex Traits) were used. In addition to extracting consequences on gene expression and function, FUMA prioritizes lead SNPs and potential causal genes by integrating data from 14 biological data repositories and tools. Details on how the FUMA platform was constructed may be found online (<https://www.biorxiv.org/content/early/2017/02/20/110023>). Briefly, the *SNP2GENE* function maps lead SNPs to genes based on LD patterns, consequences on gene function using ANNOVAR<sup>5</sup> and eQTL analyses. The *GENE2FUNC* process then annotates the resulting prioritized genes with biological information based on previously associated diseases, drug targets, and molecular pathways. FUMA analysis was performed based on independent lead SNPs with  $P < 5 \times 10^{-8}$  using the default settings (FDR  $< 0.05$ ,  $r^2 \geq 0.6$ , LD window size  $\leq 250$  kB). DEPICT identifies enriched cell types, tissues, and pathways from associated loci by integrating data from a large number of microarrays (expression data from 77,840 samples), previously annotated gene sets, and associated biological pathways (molecular pathways, mouse gene knock-out studies).<sup>4</sup> For DEPICT analysis, an FDR of 0.05 was applied as the cutoff-value for statistical significance.

#### Height and varicose veins: Mendelian randomization analysis

Of the 697 height-associated SNPs from the GIANT consortium<sup>6</sup>, 135 SNPs were excluded due to linkage disequilibrium with other SNPs, and 26 were excluded due to harmonizing issues. To minimize the potential impact of pleiotropy, we excluded outliers, heterogeneous variants and recognized GWAS hits for confounders, specifically for BMI and WHR (rs17391694, rs1055144 and rs11152213).<sup>7,8</sup> MR analyses was performed with two separate instrumental variables: 1) excluding 24 potential pleiotropic variants, and 2) including all 536 independent lead variants from the GWAS for height.

Four separate MR methods were used to assess the causal relationship of height with varicose veins: standard inverse-variance weight (IVW) regression, maximum likelihood MR, weighted Median, and MR Egger regression. We also performed a leave-one-out sensitivity analysis to exclude any single SNP driving associations. Statistical power was estimated using the sample sizes, reported variance explained from the GIANT consortium<sup>6</sup>, and an alpha threshold of 0.05 for the calculated effect size of height on incident varicose veins.

## Supplemental Reference

1. Friedman JH. Greedy function approximation: A gradient boosting machine. *Ann Stat.* 2001;29:1189-1232.
2. Bycroft C, Freeman C, Petkova D, Band G, Elliott LT, Sharp K, Motyer A, Vukcevic D, Delaneau O, O'Connell J, Cortes A, Welsh S, McVean G, Leslie S, Donnelly P, Marchini J. Genome-wide genetic data on ~500,000 UK Biobank participants. *bioRxiv.* 2017. doi: <https://doi.org/10.1101/166298>.
3. Watanabe K, Taskesen E, van Bochoven A and Posthuma D. Functional mapping and annotation of genetic associations with FUMA. *Nat Commun.* 2017;8:1826.
4. Pers TH, Karjalainen JM, Chan Y, Westra HJ, Wood AR, Yang J, Lui JC, Vedantam S, Gustafsson S, Esko T, Frayling T, Speliotes EK, Genetic Investigation of ATC, Boehnke M, Raychaudhuri S, Fehrmann RS, Hirschhorn JN and Franke L. Biological interpretation of genome-wide association studies using predicted gene functions. *Nat Commun.* 2015;6:5890.
5. Wang K, Li M, Hakonarson H. ANNOVAR: Functional annotation of genetic variants from next-generation sequencing data. *Nucleic Acids Research.* 2010;38:e164.
6. Wood AR, Esko T, Yang J, Vedantam S, Pers TH, Gustafsson S, Chu AY, Estrada K, Luan J, Kutalik Z, Amin N, Buchkovich ML, Croteau-Chonka DC, Day FR, Duan Y, Fall T, Fehrmann R, Ferreira T, Jackson AU, Karjalainen J, Lo KS, Locke AE, Magi R, Mihailov E, Porcu E, Randall JC, Scherag A, Vinkhuyzen AA, Westra HJ, Winkler TW, Workalemahu T, Zhao JH, Absher D, Albrecht E, Anderson D, Baron J, Beekman M, Demirkan A, Ehret GB, Feenstra B, Feitosa MF, Fischer K, Fraser RM, Goel A, Gong J, Justice AE, Kanoni S, Kleber ME, Kristiansson K, Lim U, Lotay V, Lui JC, Mangino M, Mateo Leach I, Medina-Gomez C, Nalls MA, Nyholt DR, Palmer CD, Pasko D, Pechlivanis S, Prokopenko I, Ried JS, Ripke S, Shungin D, Stancakova A, Strawbridge RJ, Sung YJ, Tanaka T, Teumer A, Trompet S, van der Laan SW, van Setten J, Van Vliet-Ostaptchouk JV, Wang Z, Yengo L, Zhang W, Afzal U, Arnlöv J, Arscott GM, Bandinelli S, Barrett A, Bellis C, Bennett AJ, Berne C, Blüher M, Bolton JL, Bottcher Y, Boyd HA, Bruinenberg M, Buckley BM, Buyske S, Caspersen IH, Chines PS, Clarke R, Claudi-Boehm S, Cooper M, Daw EW, De Jong PA, Deelen J, Delgado G, Denny JC, Dhonukshe-Rutten R, Dimitriou M, Doney AS, Dorr M, Eklund N, Eury E, Folkersen L, Garcia ME, Geller F, Giedraitis V, Go AS, Grallert H, Grammer TB, Grassler J, Gronberg H, de Groot LC, Groves CJ, Haessler J, Hall P, Haller T, Hallmans G, Hannemann A, Hartman CA, Hassinen M, Hayward C, Heard-Costa NL, Helmer Q, Hemani G, Henders AK, Hillege HL, Hlatky MA, Hoffmann W, Hoffmann P, Holmen O, Houwing-Duistermaat JJ, Illig T, Isaacs A, James AL, Jeff J, Johansen B, Johansson A, Jolley J, Juliusdottir T, Junttila J, Kho AN, Kinnunen L, Klopp N, Kocher T, Kratzer W, Lichtner P, Lind L, Lindstrom J, Lobbens S, Lorentzon M, Lu Y, Lyssenko V, Magnusson PK, Mahajan A, Maillard M, McArdle WL, McKenzie CA, McLachlan S, McLaren PJ, Menni C, Merger S, Milani L, Moayyeri A, Monda KL, Morcken MA, Muller G, Muller-Nurasyid M, Musk AW, Narisu N, Nauck M, Nolte IM, Nothen MM, Oozageer L, Pilz S, Rayner NW, Renstrom F, Robertson NR, Rose LM, Roussel R, Sanna S, Scharnagl H, Scholtens S, Schumacher FR, Schunkert H, Scott RA, Sehmi J, Seufferlein T, Shi J, Silventoinen K, Smit JH, Smith AV, Smolonska J, Stanton AV, Stirrups K, Stott DJ, Stringham HM, Sundstrom J, Swertz MA, Syvanen AC, Tayo BO, Thorleifsson G, Tyrer JP, van Dijk S, van Schoor NM, van der Velde N, van Heemst D, van Oort FV, Vermeulen SH, Verweij N, Vonk JM, Waite LL, Waldenberger M, Wennauer R, Wilkens LR, Willenborg C, Wilsgaard T, Wojczynski MK, Wong A, Wright AF, Zhang Q, Arveiler D, Bakker SJ, Beilby J, Bergman RN, Bergmann S, Biffar R, Blangero J, Boomsma DI, Bornstein SR, Bovet P, Brambilla P, Brown MJ, Campbell H, Caulfield MJ, Chakravarti A, Collins R, Collins FS, Crawford DC, Cupples LA, Danesh J, de Faire U, den Ruijter HM, Erbel R, Erdmann J, Eriksson JG, Farrall M, Ferrannini E, Ferrieres J, Ford I, Forouhi NG, Forrester T, Gansevoort RT, Gejman PV, Gieger C, Golay A, Gottesman O, Gudnason V, Gyllenstein U, Haas DW, Hall AS, Harris TB, Hattersley AT, Heath AC, Hengstenberg C, Hicks AA, Hindorf LA, Hingorani AD, Hofman A, Hovingh GK, Humphries SE, Hunt SC, Hypponen E, Jacobs KB, Jarvelin MR, Jousilahti P, Jula AM, Kaprio J, Kastelein JJ, Kayser M, Kee F, Keinanen-Kiukkaanniemi SM, Kiemeny LA, Kooner JS, Kooperberg C, Koskinen S, Kovacs P, Kraja AT, Kumari M, Kuusisto J, Lakka TA, Langenberg C, Le Marchand L, Lehtimäki T, Lupoli S, Madden PA, Mannisto S, Manunta P, Marette A, Matise TC, McKnight B, Meitinger T, Moll FL, Montgomery GW, Morris AD, Morris AP, Murray JC, Nelis M, Ohlsson C, Oldehinkel AJ, Ong KK, Ouwehand WH, Pasterkamp G, Peters A, Pramstaller PP, Price JF, Qi L, Raitakari OT, Rankinen T, Rao DC, Rice TK, Ritchie M, Rudan I, Salomaa V, Samani NJ, Saramies J, Sarzynski MA, Schwarz PE, Sebert S, Sever P, Shuldiner AR, Sinisalo J, Steinthorsdottir V, Stolk RP, Tardif JC, Tonjes A, Tremblay A, Tremoli E, Virtamo J, Vohl MC, Electronic Medical R, Genomics C, Consortium MI, Consortium P, LifeLines Cohort S, Amouyel P, Asselbergs FW, Assimes TL, Bochud M, Boehm BO, Boerwinkle E, Bottinger EP, Bouchard C, Cauchi S, Chambers JC, Chanock SJ, Cooper RS, de Bakker PI, Dedoussis G, Ferrucci L, Franks PW, Froguel P, Groop LC, Haiman CA, Hamsten A, Hayes MG, Hui J, Hunter DJ, Hveem K, Jukema JW, Kaplan RC, Kivimäki M, Kuh D, Laakso M, Liu Y, Martin NG, Marz W, Melbye M, Moebus S, Munroe PB, Njolstad I, Oostra BA, Palmer CN, Pedersen NL, Perola M, Perusse L, Peters U, Powell JE,

Power C, Quertermous T, Rauramaa R, Reinmaa E, Ridker PM, Rivadeneira F, Rotter JI, Saaristo TE, Saleheen D, Schlessinger D, Slagboom PE, Snieder H, Spector TD, Strauch K, Stumvoll M, Tuomilehto J, Uusitupa M, van der Harst P, Volzke H, Walker M, Wareham NJ, Watkins H, Wichmann HE, Wilson JF, Zanen P, Deloukas P, Heid IM, Lindgren CM, Mohlke KL, Sneliotes EK, Thorsteinsdottir U, Barroso I, Fox CS, North KE, Strachan DP, Beckmann JS, Berndt SI, Boehnke M, Borecki IB, McCarthy MI, Metspalu A, Stefansson K, Uitterlinden AG, van Duijn CM, Franke L, Willer CJ, Price AL, Lettre G, Loos RJ, Weedon MN, Ingelsson E, O'Connell JR, Abecasis GR, Chasman DI, Goddard ME, Visscher PM, Hirschhorn JN and Frayling TM. Defining the role of common variation in the genomic and biological architecture of adult human height. *Nat Genet.* 2014;46:1173-1186.

7. Locke AE, Kahali B, Berndt SI, Justice AE, Pers TH, Day FR, Powell C, Vedantam S, Buchkovich ML, Yang J, Croteau-Chonka DC, Esko T, Fall T, Ferreira T, Gustafsson S, Kutalik Z, Luan J, Magi R, Randall JC, Winkler TW, Wood AR, Workalemahu T, Faul JD, Smith JA, Zhao JH, Zhao W, Chen J, Fehrmann R, Hedman AK, Karjalainen J, Schmidt EM, Absher D, Amin N, Anderson D, Beekman M, Bolton JL, Bragg-Gresham JL, Buyske S, Demirkan A, Deng G, Ehret GB, Feenstra B, Feitosa MF, Fischer K, Goel A, Gong J, Jackson AU, Kanoni S, Kleber ME, Kristiansson K, Lim U, Lotay V, Mangino M, Leach IM, Medina-Gomez C, Medland SE, Nalls MA, Palmer CD, Pasko D, Pechlivanis S, Peters MJ, Prokopenko I, Shungin D, Stancakova A, Strawbridge RJ, Sung YJ, Tanaka T, Teumer A, Trompet S, van der Laan SW, van Setten J, Van Vliet-Ostaptchouk JV, Wang Z, Yengo L, Zhang W, Isaacs A, Albrecht E, Arnlöv J, Arscott GM, Attwood AP, Bandinelli S, Barrett A, Bas IN, Bellis C, Bennett AJ, Berne C, Blagieva R, Bluher M, Bohringer S, Bonnycastle LL, Bottcher Y, Boyd HA, Bruinenberg M, Caspersen IH, Chen YI, Clarke R, Daw EW, de Craen AJM, Delgado G, Dimitriou M, Doney ASF, Eklund N, Estrada K, Eury E, Folkersen L, Fraser RM, Garcia ME, Geller F, Giedraitis V, Gigante B, Go AS, Golay A, Goodall AH, Gordon SD, Gorski M, Grabe HJ, Grallert H, Grammer TB, Grassler J, Gronberg H, Groves CJ, Gusto G, Haessler J, Hall P, Haller T, Hallmans G, Hartman CA, Hassinen M, Hayward C, Heard-Costa NL, Helmer Q, Hengstenberg C, Holmen O, Hottenga JJ, James AL, Jeff JM, Johansson A, Jolley J, Juliusdottir T, Kinnunen L, Koenig W, Koskenvuo M, Kratzer W, Laitinen J, Lamina C, Leander K, Lee NR, Lichtner P, Lind L, Lindstrom J, Lo KS, Lobbens S, Lohrbein R, Lu Y, Mach F, Magnusson PKE, Mahajan A, McArdle WL, McLachlan S, Menni C, Merger S, Mihailov E, Milani L, Moayyeri A, Monda KL, Morken MA, Mulas A, Muller G, Muller-Nurasyid M, Musk AW, Nagaraja R, Nothen MM, Nolte IM, Pilz S, Rayner NW, Renstrom F, Rettig R, Ried JS, Ripke S, Robertson NR, Rose LM, Sanna S, Scharnagl H, Scholtens S, Schumacher FR, Scott WR, Seufferlein T, Shi J, Smith AV, Smolonska J, Stanton AV, Steinthorsdottir V, Stirrups K, Stringham HM, Sundstrom J, Swertz MA, Swift AJ, Syvanen AC, Tan ST, Tayo BO, Thorand B, Thorleifsson G, Tyrer JP, Uh HW, Vandenput L, Verhulst FC, Vermeulen SH, Verweij N, Vonk JM, Waite LL, Warren HR, Waterworth D, Weedon MN, Wilkens LR, Willenborg C, Wilsgaard T, Wojczynski MK, Wong A, Wright AF, Zhang Q, LifeLines Cohort S, Brennan EP, Choi M, Dastani Z, Drong AW, Eriksson P, Franco-Cereceda A, Gadin JR, Gharavi AG, Goddard ME, Handsaker RE, Huang J, Karpe F, Kathiresan S, Keildson S, Kiryluk K, Kubo M, Lee JY, Liang L, Lifton RP, Ma B, McCarroll SA, McKnight AJ, Min JL, Moffatt MF, Montgomery GW, Murabito JM, Nicholson G, Nyholt DR, Okada Y, Perry JRB, Dorajoo R, Reinmaa E, Salem RM, Sandholm N, Scott RA, Stolk L, Takahashi A, Tanaka T, van 't Hooft FM, Vinkhuyzen AAE, Westra HJ, Zheng W, Zondervan KT, Consortium AD, Group A-BW, Consortium CAD, Consortium CK, Glgc, Icbp, Investigators M, Mu TC, Consortium MI, Consortium P, ReproGen C, Consortium G, International Endogene C, Heath AC, Arveiler D, Bakker SJL, Beilby J, Bergman RN, Blangero J, Bovet P, Campbell H, Caulfield MJ, Cesana G, Chakravarti A, Chasman DI, Chines PS, Collins FS, Crawford DC, Cupples LA, Cusi D, Danesh J, de Faire U, den Ruijter HM, Dominiczak AF, Erbel R, Erdmann J, Eriksson JG, Farrall M, Felix SB, Ferrannini E, Ferrieres J, Ford I, Forouhi NG, Forrester T, Franco OH, Gansevoort RT, Gejman PV, Gieger C, Gottesman O, Gudnason V, Gyllenstein U, Hall AS, Harris TB, Hattersley AT, Hicks AA, Hindorf LA, Hingorani AD, Hofman A, Homuth G, Hovingh GK, Humphries SE, Hunt SC, Hypponen E, Illig T, Jacobs KB, Jarvelin MR, Jockel KH, Johansen B, Jousilahti P, Jukema JW, Jula AM, Kaprio J, Kastelein JJP, Keinanen-Kiukkaanniemi SM, Kiemeny LA, Knekt P, Kooner JS, Kooperberg C, Kovacs P, Kraja AT, Kumari M, Kuusisto J, Lakka TA, Langenberg C, Marchand LL, Lehtimäki T, Lyssenko V, Mannisto S, Marette A, Matise TC, McKenzie CA, McKnight B, Moll FL, Morris AD, Morris AP, Murray JC, Nelis M, Ohlsson C, Oldehinkel AJ, Ong KK, Madden PAF, Pasterkamp G, Peden JF, Peters A, Postma DS, Pramstaller PP, Price JF, Qi L, Raitakari OT, Rankinen T, Rao DC, Rice TK, Ridker PM, Rioux JD, Ritchie MD, Rudan I, Salomaa V, Samani NJ, Saramies J, Sarzynski MA, Schunkert H, Schwarz PEH, Sever P, Shuldiner AR, Sinisalo J, Stolk RP, Strauch K, Tonjes A, Tregouet DA, Tremblay A, Tremoli E, Virtamo J, Vohl MC, Volker U, Waeber G, Willemsen G, Witteman JC, Zillikens MC, Adair LS, Amouyel P, Asselbergs FW, Assimes TL, Bochud M, Boehm BO, Boerwinkle E, Bornstein SR, Bottinger EP, Bouchard C, Cauchi S, Chambers JC, Chanock SJ, Cooper RS, de Bakker PIW, Dedoussis G, Ferrucci L, Franks PW, Froguel P, Groop LC, Haiman CA, Hamsten A, Hui J, Hunter DJ, Hveem K, Kaplan RC, Kivimäki M, Kuh D, Laakso M, Liu Y, Martin NG, Marz W, Melbye M, Metspalu A, Moebus S, Munroe PB,

Njolstad I, Oostra BA, Palmer CNA, Pedersen NL, Perola M, Perusse L, Peters U, Power C, Quertermous T, Rauramaa R, Rivadeneira F, Saaristo TE, Saleheen D, Sattar N, Schadt EE, Schlessinger D, Slagboom PE, Snieder H, Spector TD, Thorsteinsdottir U, Stumvoll M, Tuomilehto J, Uitterlinden AG, Uusitupa M, van der Harst P, Walker M, Wallaschofski H, Wareham NJ, Watkins H, Weir DR, Wichmann HE, Wilson JF, Zanen P, Borecki IB, Deloukas P, Fox CS, Heid IM, O'Connell JR, Strachan DP, Stefansson K, van Duijn CM, Abecasis GR, Franke L, Frayling TM, McCarthy MI, Visscher PM, Scherag A, Willer CJ, Boehnke M, Mohlke KL, Lindgren CM, Beckmann JS, Barroso I, North KE, Ingelsson E, Hirschhorn JN, Loos RJJ and Speliotes EK. Genetic studies of body mass index yield new insights for obesity biology. *Nature*. 2015;518:197-206.

8. Shungin D, Winkler TW, Croteau-Chonka DC, Ferreira T, Locke AE, Magi R, Strawbridge RJ, Pers TH, Fischer K, Justice AE, Workalemahu T, Wu JMW, Buchkovich ML, Heard-Costa NL, Roman TS, Drong AW, Song C, Gustafsson S, Day FR, Esko T, Fall T, Kutalik Z, Luan J, Randall JC, Scherag A, Vedantam S, Wood AR, Chen J, Fehrmann R, Karjalainen J, Kahali B, Liu CT, Schmidt EM, Absher D, Amin N, Anderson D, Beekman M, Bragg-Gresham JL, Buyske S, Demirkan A, Ehret GB, Feitosa MF, Goel A, Jackson AU, Johnson T, Kleber ME, Kristiansson K, Mangino M, Leach IM, Medina-Gomez C, Palmer CD, Pasko D, Pechlivanis S, Peters MJ, Prokopenko I, Stancakova A, Sung YJ, Tanaka T, Teumer A, Van Vliet-Ostaptchouk JV, Yengo L, Zhang W, Albrecht E, Arnlöv J, Arscott GM, Bandinelli S, Barrett A, Bellis C, Bennett AJ, Berne C, Bluher M, Bohringer S, Bonnet F, Botcher Y, Bruinenberg M, Carba DB, Caspersen IH, Clarke R, Daw EW, Deelen J, Deelman E, Delgado G, Doney AS, Eklund N, Erdos MR, Estrada K, Eury E, Friedrich N, Garcia ME, Giedraitis V, Gigante B, Go AS, Golay A, Grallert H, Grammer TB, Grassler J, Grewal J, Groves CJ, Haller T, Hallmans G, Hartman CA, Hassinen M, Hayward C, Heikkilä K, Herzig KH, Helmer Q, Hillege HL, Holmen O, Hunt SC, Isaacs A, Ittermann T, James AL, Johansson I, Juliusdottir T, Kalafati IP, Kinnunen L, Koenig W, Kooner IK, Kratzer W, Lamina C, Leander K, Lee NR, Lichtner P, Lind L, Lindstrom J, Lobbens S, Lorentzon M, Mach F, Magnusson PK, Mahajan A, McArdle WL, Menni C, Merger S, Mihailov E, Milani L, Mills R, Moayyeri A, Monda KL, Mooijaart SP, Muhleisen TW, Mulas A, Muller G, Muller-Nurasyid M, Nagaraja R, Nalls MA, Narisu N, Glorioso N, Nolte IM, Olden M, Rayner NW, Renstrom F, Ried JS, Robertson NR, Rose LM, Sanna S, Schernagl H, Scholtens S, Sennblad B, Seufferlein T, Sitlani CM, Smith AV, Stirrups K, Stringham HM, Sundstrom J, Swertz MA, Swift AJ, Syvanen AC, Tayo BO, Thorand B, Thorleifsson G, Tomaschitz A, Troffa C, van Oort FV, Verweij N, Vonk JM, Waite LL, Wennauer R, Wilsgaard T, Wojczynski MK, Wong A, Zhang Q, Zhao JH, Brennan EP, Choi M, Eriksson P, Folkersen L, Franco-Cereceda A, Gharavi AG, Hedman AK, Hivert MF, Huang J, Kanoni S, Karpe F, Keildson S, Kiryluk K, Liang L, Lifton RP, Ma B, McKnight AJ, McPherson R, Metspalu A, Min JL, Moffatt MF, Montgomery GW, Murabito JM, Nicholson G, Nyholt DR, Olsson C, Perry JR, Reinmaa E, Salem RM, Sandholm N, Schadt EE, Scott RA, Stolk L, Vallejo EE, Westra HJ, Zondervan KT, Consortium AD, Consortium CAD, Consortium CK, Consortium G, Consortium G, Glgc, Icbp, International Endogene C, LifeLines Cohort S, Investigators M, Mu TC, Consortium P, ReproGen C, Amouyel P, Arveiler D, Bakker SJ, Beilby J, Bergman RN, Blangero J, Brown MJ, Burnier M, Campbell H, Chakravarti A, Chines PS, Claudi-Boehm S, Collins FS, Crawford DC, Danesh J, de Faire U, de Geus EJ, Dorr M, Erbel R, Eriksson JG, Farrall M, Ferrannini E, Ferrieres J, Forouhi NG, Forrester T, Franco OH, Gansevoort RT, Gieger C, Gudnason V, Haiman CA, Harris TB, Hattersley AT, Heliövaara M, Hicks AA, Hingorani AD, Hoffmann W, Hofman A, Homuth G, Humphries SE, Hyppönen E, Illig T, Jarvelin MR, Johansen B, Jousilahti P, Jula AM, Kaprio J, Kee F, Keinänen-Kiukkaanniemi SM, Kooner JS, Kooperberg C, Kovacs P, Kraja AT, Kumari M, Kuulasmaa K, Kuusisto J, Lakka TA, Langenberg C, Le Marchand L, Lehtimäki T, Lyssenko V, Mannisto S, Marette A, Matise TC, McKenzie CA, McKnight B, Musk AW, Mohlenkamp S, Morris AD, Nelis M, Ohlsson C, Oldehinkel AJ, Ong KK, Palmer LJ, Penninx BW, Peters A, Pramstaller PP, Raitakari OT, Rankinen T, Rao DC, Rice TK, Ridker PM, Ritchie MD, Rudan I, Salomaa V, Samani NJ, Saramies J, Sarzynski MA, Schwarz PE, Shuldiner AR, Staessen JA, Steinthorsdottir V, Stolk RP, Strauch K, Tonjes A, Tremblay A, Tremoli E, Vohl MC, Volker U, Vollenweider P, Wilson JF, Wittteman JC, Adair LS, Bochud M, Boehm BO, Bornstein SR, Bouchard C, Cauchi S, Caulfield MJ, Chambers JC, Chasman DI, Cooper RS, Dedoussis G, Ferrucci L, Froguel P, Grabe HJ, Hamsten A, Hui J, Hveem K, Jockel KH, Kivimäki M, Kuh D, Laakso M, Liu Y, Marz W, Munroe PB, Njolstad I, Oostra BA, Palmer CN, Pedersen NL, Perola M, Perusse L, Peters U, Power C, Quertermous T, Rauramaa R, Rivadeneira F, Saaristo TE, Saleheen D, Sinisalo J, Slagboom PE, Snieder H, Spector TD, Stefansson K, Stumvoll M, Tuomilehto J, Uitterlinden AG, Uusitupa M, van der Harst P, Veronesi G, Walker M, Wareham NJ, Watkins H, Wichmann HE, Abecasis GR, Assimes TL, Berndt SI, Boehnke M, Borecki IB, Deloukas P, Franke L, Frayling TM, Groop LC, Hunter DJ, Kaplan RC, O'Connell JR, Qi L, Schlessinger D, Strachan DP, Thorsteinsdottir U, van Duijn CM, Willer CJ, Visscher PM, Yang J, Hirschhorn JN, Zillikens MC, McCarthy MI, Speliotes EK, North KE, Fox CS, Barroso I, Franks PW, Ingelsson E, Heid IM, Loos RJ, Cupples LA, Morris AP, Lindgren CM and Mohlke KL. New genetic loci link adipose and insulin biology to body fat distribution. *Nature*. 2015;518:187-196.

**Supplemental Figure Legends**

**Supplemental Figure 1:** Cox models relating varicose veins to BMI, waist-hip ratio, history of leg artery operation, birth weight of first child, age completed full time education, cellulitis and acute lymphangitis (ICD10: L03), other and unspecified soft tissue disorders; not elsewhere classified (ICD10: M79), non-pressure chronic ulcer of lower limb; not elsewhere classified (ICD10: L97), and history of major operation.

**Supplemental Figure 2:** Quantile-quantile (QQ) of the expected vs. observed log p-values for genome-wide association results for varicose veins.

**Supplemental Figure 3:** Regional plots of the 30 novel loci associated with varicose veins.

**Supplemental Figure 4:** Scatter and forest plot demonstrating the association between height and varicose veins.

**Supplemental Figure 5:** Leave-one-out sensitivity analysis demonstrating that SNPs associated with height remain associated with varicose veins, implying a causal relationship

**Supplemental Table 1. Candidate predictor variables in the gradient boosting machine (GBM) model for varicose veins.**

| Variable                                                                | Variable group |
|-------------------------------------------------------------------------|----------------|
| Age deep-vein thrombosis (DVT, blood clot in leg) diagnosed             | n_4012_0_0     |
| Impedance of leg (left)                                                 | n_23108_0_0    |
| Had other major operations                                              | n_2844_0_0     |
| Surgery on leg arteries (other than for varicose veins)                 | n_5529_0_0     |
| Standing height                                                         | n_50_0_0       |
| Ulcer of lower limb, not elsewhere classified (ICD-10: L97)             | groupL97       |
| Age at first live birth                                                 | n_2754_0_0     |
| Impedance of leg (right)                                                | n_23107_0_0    |
| Other soft tissue disorders, not elsewhere classified (ICD-10: M79)     | groupM79       |
| Birth weight of first child                                             | n_2744_0_0     |
| Cellulitis (ICD-10: L03)                                                | groupL03       |
| Age completed full time education                                       | n_845_0_0      |
| Place of birth in UK - north co-ordinate                                | n_129_0_0      |
| Impedance of arm (left)                                                 | n_23110_0_0    |
| Other peripheral vascular diseases (ICD-10: I73)                        | groupI73       |
| Comparative height size at age 10                                       | n_1697_0_0     |
| Job code                                                                | n_132_0_0      |
| Impedance of arm (right)                                                | n_23109_0_0    |
| Female genital prolapse (ICD-10: N81)                                   | groupN81       |
| Number of days/week walked 10+ minutes                                  | n_864_0_0      |
| Age started wearing glasses or contact lenses                           | n_2217_0_0     |
| Age at recruitment                                                      | n_21022_0_0    |
| Trunk fat percentage                                                    | n_23127_0_0    |
| Had major operations                                                    | n_2415_0_0     |
| Venous complications in the puerperium (ICD-10: O87)                    | groupO87       |
| Other dermatitis (ICD-10: L30)                                          | groupL30       |
| Leg fat percentage (left)                                               | n_23115_0_0    |
| Average total household income before tax                               | n_738_0_0      |
| Number of live births                                                   | n_2734_0_0     |
| Age diabetes diagnosed                                                  | n_2976_0_0     |
| Age started hormone-replacement therapy (HRT)                           | n_3536_0_0     |
| Red blood cell (erythrocyte) distribution width                         | n_30070_0_0    |
| Place of birth in UK - east co-ordinate                                 | n_130_0_0      |
| Platelet distribution width                                             | n_30110_0_0    |
| Duration of moderate activity                                           | n_894_0_0      |
| Leg fat percentage (right)                                              | n_23111_0_0    |
| Spherical power (left)                                                  | n_5085_0_0     |
| Other arthritis (ICD-10: M13)                                           | groupM13       |
| Age at last live birth                                                  | n_2764_0_0     |
| Interpolated Age of participant when non-cancer illness first diagnosed | n_20009_0_0    |
| Age when last used oral contraceptive pill                              | n_2804_0_0     |
| Intra-ocular pressure, Goldmann-correlated (left)                       | n_5263_0_0     |
| Neuroticism score                                                       | n_20127_0_0    |
| Neutrophil percentage                                                   | n_30200_0_0    |
| 6mm asymmetry angle (right)                                             | n_5109_0_0     |
| Platelet crit                                                           | n_30090_0_0    |
| White blood cell (leukocyte) count                                      | n_30000_0_0    |
| Ankle spacing width                                                     | n_3143_0_0     |
| Mean time to correctly identify matches                                 | n_20023_0_0    |
| Polyarthrosis (ICD-10: M15)                                             | groupM15       |
| 6mm asymmetry index (right)                                             | n_5158_0_0     |
| Acquired deformities of fingers and toes (ICD-10: M20)                  | groupM20       |
| Inguinal hernia (ICD-10: K40)                                           | groupK40       |
| Time spent using computer                                               | n_1080_0_0     |
| Ankle spacing width (left)                                              | n_4100_0_0     |
| Forced vital capacity (FVC)                                             | n_3062_0_0     |
| UK Biobank assessment centre                                            | n_54_0_0       |
| Immature reticulocyte fraction                                          | n_30280_0_0    |
| Birth weight                                                            | n_20022_0_0    |
| Weight                                                                  | n_21002_0_0    |
| Corneal hysteresis (right)                                              | n_5256_0_0     |
| Red blood cell (erythrocyte) count                                      | n_30010_0_0    |
| Refractometry result unreliable (right)                                 | s_5091_0_0     |
| Forced vital capacity (FVC), Best measure                               | n_20151_0_0    |
| Frequency of walking for pleasure in last 4 weeks                       | n_971_0_0      |
| Internal derangement of knee (ICD-10: M23)                              | groupM23       |
| Monocyte percentage                                                     | n_30190_0_0    |
| Age last used hormone-replacement therapy (HRT)                         | n_3546_0_0     |
| Hip circumference                                                       | n_49_0_0       |
| 6mm weak meridian (right)                                               | n_5098_0_0     |
| Reason for reducing amount of alcohol drunk                             | n_2664_0_0     |
| Platelet count                                                          | n_30080_0_0    |
| Cereal intake                                                           | n_1458_0_0     |
| Alcohol intake frequency.                                               | n_1558_0_0     |
| Potassium in urine                                                      | n_30520_0_0    |

|                                                                                                                                |                |
|--------------------------------------------------------------------------------------------------------------------------------|----------------|
| Intra-ocular pressure, corneal-compensated (left)                                                                              | n_5262_0_0     |
| Diastolic blood pressure, manual reading                                                                                       | n_94_0_0       |
| Vitiligo (ICD-10: L80)                                                                                                         | groupL80       |
| Calibration coefficients - y offset                                                                                            | n_90162_0_0    |
| Time when initial screen shown                                                                                                 | ts_4286_0_0    |
| Duration screen displayed                                                                                                      | n_4290_0_0     |
| Systolic blood pressure, automated reading                                                                                     | n_4080_0_0     |
| Arm fat percentage (right)                                                                                                     | n_23119_0_0    |
| op_skin_lesion                                                                                                                 | op_skin_lesion |
| Forced expiratory volume in 1-second (FEV1), predicted percentage                                                              | n_20154_0_0    |
| Fraction acceleration <= 9 milli-gravities                                                                                     | n_90100_0_0    |
| Age asthma diagnosed                                                                                                           | n_3786_0_0     |
| Other disorders of skin and subcutaneous tissue, not elsewhere classified (ICD-10: L98)                                        | groupL98       |
| Congenital malformations of cardiac septa (ICD-10: Q21)                                                                        | groupQ21       |
| Average acceleration 13:00 - 13:59                                                                                             | n_90040_0_0    |
| Age started oral contraceptive pill                                                                                            | n_2794_0_0     |
| 3mm weak meridian (right)                                                                                                      | n_5099_0_0     |
| Average acceleration 07:00 - 07:59                                                                                             | n_90034_0_0    |
| Spherical power (right)                                                                                                        | n_5084_0_0     |
| Speech-reception-threshold (SRT) estimate (right)                                                                              | n_20021_0_0    |
| Benign neoplasm of eye and adnexa (ICD-10: D31)                                                                                | groupD31       |
| Bread type                                                                                                                     | n_1448_0_0     |
| Reason for reducing amount of alcohol drunk (pilot)                                                                            | n_10818_0_0    |
| Leg fat-free mass (right)                                                                                                      | n_23113_0_0    |
| Mineral and other dietary supplements                                                                                          | n_6179_0_0     |
| Age COPD (Chronic Obstructive Pulmonary Disease) diagnosed by doctor                                                           | n_22150_0_0    |
| Sodium in urine acquisition time                                                                                               | ts_30532_0_0   |
| Haematocrit percentage                                                                                                         | n_30030_0_0    |
| Number of full sisters                                                                                                         | n_1883_0_0     |
| Heel bone mineral density (BMD) T-score, automated                                                                             | n_78_0_0       |
| Average weekly beer plus cider intake                                                                                          | n_1588_0_0     |
| Mean corpuscular haemoglobin concentration                                                                                     | n_30060_0_0    |
| Invitation to physical activity study, date sent                                                                               | ts_110006_0_0  |
| Calibration coefficients - x slope                                                                                             | n_90164_0_0    |
| Qualifications                                                                                                                 | n_6138_0_0     |
| Monocyte count                                                                                                                 | n_30130_0_0    |
| Other disorders of urinary system (ICD-10: N39)                                                                                | groupN39       |
| Calibration - maximum x stationary value                                                                                       | n_90173_0_0    |
| Neutrophill count                                                                                                              | n_30140_0_0    |
| 3mm strong meridian (left)                                                                                                     | n_5135_0_0     |
| Why stopped smoking                                                                                                            | n_6157_0_0     |
| Fraction acceleration <= 1300 milli-gravities                                                                                  | n_90151_0_0    |
| Townsend deprivation index at recruitment                                                                                      | n_189_0_0      |
| Microalbumin in urine                                                                                                          | n_30500_0_0    |
| Average acceleration 20:00 - 20:59                                                                                             | n_90047_0_0    |
| Umbilical hernia (ICD-10: K42)                                                                                                 | groupK42       |
| Obesity (ICD-10: E66)                                                                                                          | groupE66       |
| Number of days/week of moderate physical activity 10+ minutes                                                                  | n_884_0_0      |
| Time spent driving                                                                                                             | n_1090_0_0     |
| ECG/bike method for fitness test                                                                                               | n_6019_0_0     |
| Types of physical activity in last 4 weeks                                                                                     | n_6164_0_0     |
| Mouth/teeth dental problems                                                                                                    | n_6149_0_0     |
| 6mm strong meridian angle (right)                                                                                              | n_5106_0_0     |
| Lymphocyte count                                                                                                               | n_30120_0_0    |
| High light scatter reticulocyte percentage                                                                                     | n_30290_0_0    |
| Average acceleration 17:00 - 17:59                                                                                             | n_90044_0_0    |
| Basophill count                                                                                                                | n_30160_0_0    |
| Father's age                                                                                                                   | n_2946_0_0     |
| Peak expiratory flow (PEF)                                                                                                     | n_3064_0_0     |
| Intra-ocular pressure, corneal-compensated (right)                                                                             | n_5254_0_0     |
| Femoral hernia (ICD-10: K41)                                                                                                   | groupK41       |
| Cereal type                                                                                                                    | n_1468_0_0     |
| Forced expiratory volume in 1-second (FEV1), predicted                                                                         | n_20153_0_0    |
| Pulse wave reflection index                                                                                                    | n_4195_0_0     |
| Average acceleration 00:00 - 00:59                                                                                             | n_90027_0_0    |
| Pulse rate, automated reading                                                                                                  | n_102_0_0      |
| Other arthrosis (ICD-10: M19)                                                                                                  | groupM19       |
| Heel Broadband ultrasound attenuation, direct entry                                                                            | n_3144_0_0     |
| Osteoporosis without pathological fracture (ICD-10: M81)                                                                       | groupM81       |
| Rash and other nonspecific skin eruption (ICD-10: R21)                                                                         | groupR21       |
| Number of cigarettes previously smoked daily                                                                                   | n_2887_0_0     |
| Surgical operation and other surgical procedures as the cause of abnormal reaction of the patient, or of later complication, w | groupY83       |
| Light smokers, at least 100 smokes in lifetime                                                                                 | n_2644_0_0     |
| Which eye(s) affected by amblyopia (lazy eye)                                                                                  | n_5408_0_0     |
| Index of best refractometry result (left)                                                                                      | n_5276_0_0     |
| Age high blood pressure diagnosed                                                                                              | n_2966_0_0     |
| Job code - deduced                                                                                                             | n_20024_0_0    |

|                                                                                                                                                                                                          |                    |
|----------------------------------------------------------------------------------------------------------------------------------------------------------------------------------------------------------|--------------------|
| Handedness (chirality/laterality)                                                                                                                                                                        | n_1707_0_0         |
| Average weekly champagne plus white wine intake                                                                                                                                                          | n_1578_0_0         |
| Smoked cigarette or pipe within last hour                                                                                                                                                                | n_3159_0_0         |
| Age when attended assessment centre                                                                                                                                                                      | n_21003_0_0        |
| Age hay fever, rhinitis or eczema diagnosed                                                                                                                                                              | n_3761_0_0         |
| Leg pain on walking : action taken                                                                                                                                                                       | n_5507_0_0         |
| Astigmatism angle (left)                                                                                                                                                                                 | n_5089_0_0         |
| Salad / raw vegetable intake                                                                                                                                                                             | n_1299_0_0         |
| Wear duration during 01:00 - 01:59                                                                                                                                                                       | n_90061_0_0        |
| Year of birth                                                                                                                                                                                            | n_34_0_0           |
| Other and unspecified injuries of wrist and hand (ICD-10: S69)                                                                                                                                           | groupS69           |
| Fraction acceleration <= 8 milli-gravities                                                                                                                                                               | n_90099_0_0        |
| Haemoglobin concentration                                                                                                                                                                                | n_30020_0_0        |
| Corneal resistance factor (left)                                                                                                                                                                         | n_5265_0_0         |
| Number of treatments/medications taken                                                                                                                                                                   | n_137_0_0          |
| Microalbumin in urine acquisition time                                                                                                                                                                   | ts_30502_0_0       |
| Complications of procedures, not elsewhere classified (ICD-10: T81)                                                                                                                                      | groupT81           |
| Cooked vegetable intake                                                                                                                                                                                  | n_1289_0_0         |
| Temperature maximum                                                                                                                                                                                      | n_90195_0_0        |
| Other hypothyroidism (ICD-10: E03)                                                                                                                                                                       | groupE03           |
| Other medical procedures as the cause of abnormal reaction of the patient, or of later complication, without mention of misadventure or of foreign body or of retained surgical instrument (ICD-10: Y84) | groupY84           |
| Duration of walks                                                                                                                                                                                        | n_874_0_0          |
| Heel bone mineral density (BMD), manual entry                                                                                                                                                            | n_3084_0_0         |
| Vascular/heart problems diagnosed by doctor                                                                                                                                                              | n_6150_0_0         |
| Wear duration during 07:00 - 07:59                                                                                                                                                                       | n_90067_0_0        |
| Diabetes diagnosed by doctor                                                                                                                                                                             | n_2443_0_0         |
| Coffee type                                                                                                                                                                                              | n_1508_0_0         |
| Waist circumference                                                                                                                                                                                      | n_48_0_0           |
| Allergic contact dermatitis (ICD-10: L23)                                                                                                                                                                | groupL23           |
| Age cataract diagnosed                                                                                                                                                                                   | n_4700_0_0         |
| Leisure/social activities                                                                                                                                                                                | n_6160_0_0         |
| Trunk fat mass                                                                                                                                                                                           | n_23128_0_0        |
| Variation in diet                                                                                                                                                                                        | n_1548_0_0         |
| 3mm strong meridian (right)                                                                                                                                                                              | n_5132_0_0         |
| Forced expiratory volume in 1-second (FEV1)                                                                                                                                                              | n_3063_0_0         |
| Processed meat intake                                                                                                                                                                                    | n_1349_0_0         |
| Time to complete round                                                                                                                                                                                   | n_20133_0_0        |
| 6mm weak meridian (left)                                                                                                                                                                                 | n_5097_0_0         |
| Years since last breast cancer screening / mammogram                                                                                                                                                     | n_2684_0_0         |
| Salt added to food                                                                                                                                                                                       | n_1478_0_0         |
| Erosion and ectropion of cervix uteri (ICD-10: N86)                                                                                                                                                      | groupN86           |
| Sodium in urine                                                                                                                                                                                          | n_30530_0_0        |
| Fraction acceleration <= 7 milli-gravities                                                                                                                                                               | n_90098_0_0        |
| Unspecified lump in breast (ICD-10: N63)                                                                                                                                                                 | groupN63           |
| Other diseases of digestive system (ICD-10: K92)                                                                                                                                                         | groupK92           |
| Duration to complete numeric path (trail #1)                                                                                                                                                             | n_20156_0_0        |
| Haemorrhoids (ICD-10: I84)                                                                                                                                                                               | groupI84           |
| Mean corpuscular volume                                                                                                                                                                                  | n_30040_0_0        |
| When numeric memory test completed                                                                                                                                                                       | ts_20138_0_0       |
| 6mm strong meridian angle (left)                                                                                                                                                                         | n_5105_0_0         |
| Total data readings                                                                                                                                                                                      | n_90187_0_0        |
| Back pain for 3+ months                                                                                                                                                                                  | n_3571_0_0         |
| Country of Birth (non-UK origin)                                                                                                                                                                         | n_20115_0_0        |
| Agranulocytosis (ICD-10: D70)                                                                                                                                                                            | groupD70           |
| Chest pain due to walking ceases when standing still                                                                                                                                                     | n_3616_0_0         |
| Mean platelet (thrombocyte) volume                                                                                                                                                                       | n_30100_0_0        |
| op_hip_replacement                                                                                                                                                                                       | op_hip_replacement |
| 6mm asymmetry index (left)                                                                                                                                                                               | n_5157_0_0         |
| Fraction acceleration <= 100 milli-gravities                                                                                                                                                             | n_90127_0_0        |
| Body mass index (BMI)                                                                                                                                                                                    | n_21001_0_0        |
| Gastritis and duodenitis (ICD-10: K29)                                                                                                                                                                   | groupK29           |
| Age glaucoma diagnosed                                                                                                                                                                                   | n_4689_0_0         |
| Time from waking to first cigarette                                                                                                                                                                      | n_3466_0_0         |
| Comparative body size at age 10                                                                                                                                                                          | n_1687_0_0         |
| White blood cell (leukocyte) count device ID                                                                                                                                                             | s_30003_0_0        |
| Error tolerance after calibration                                                                                                                                                                        | n_90160_0_0        |
| 3mm regularity index (left)                                                                                                                                                                              | n_5163_0_0         |
| Urticaria (ICD-10: L50)                                                                                                                                                                                  | groupL50           |
| Injury of unspecified body region (ICD-10: T14)                                                                                                                                                          | groupT14           |
| Worry too long after embarrassment                                                                                                                                                                       | n_2000_0_0         |
| Ever had hysterectomy (womb removed)                                                                                                                                                                     | n_3591_0_0         |
| Leg pain when walking uphill or hurrying                                                                                                                                                                 | n_5474_0_0         |
| Corneal hysteresis (left)                                                                                                                                                                                | n_5264_0_0         |
| Facial pains for 3+ months                                                                                                                                                                               | n_4067_0_0         |
| Pulse wave velocity (manual entry)                                                                                                                                                                       | n_4207_0_0         |
| Fraction acceleration <= 3 milli-gravities                                                                                                                                                               | n_90094_0_0        |
| Impedance of whole body                                                                                                                                                                                  | n_23106_0_0        |



|                                                                                                                        |             |
|------------------------------------------------------------------------------------------------------------------------|-------------|
| Year immigrated to UK (United Kingdom)                                                                                 | n_3659_0_0  |
| Other diseases of intestine (ICD-10: K63)                                                                              | groupK63    |
| Average weekly spirits intake                                                                                          | n_1598_0_0  |
| Started insulin within one year diagnosis of diabetes                                                                  | n_2986_0_0  |
| Chest pain or discomfort when walking uphill or hurrying                                                               | n_3751_0_0  |
| Weight, manual entry                                                                                                   | n_3160_0_0  |
| Non-cancer illness year/age first occurred                                                                             | n_87_0_0    |
| Years since last cervical smear test                                                                                   | n_2704_0_0  |
| Essential (primary) hypertension (ICD-10: I10)                                                                         | groupI10    |
| Vulvovaginal ulceration and inflammation in diseases classified elsewhere (ICD-10: N77)                                | groupN77    |
| Gastro-oesophageal reflux disease (ICD-10: K21)                                                                        | groupK21    |
| Arm fat mass (right)                                                                                                   | n_23120_0_0 |
| Father's age at death                                                                                                  | n_1807_0_0  |
| Mother's age at death                                                                                                  | n_3526_0_0  |
| No-wear time bias adjusted acceleration maximum                                                                        | n_90091_0_0 |
| Average acceleration 12:00 - 12:59                                                                                     | n_90039_0_0 |
| Month of birth                                                                                                         | n_52_0_0    |
| Duration of other exercises                                                                                            | n_3647_0_0  |
| Duration of strenuous sports                                                                                           | n_1001_0_0  |
| Age at hysterectomy                                                                                                    | n_2824_0_0  |
| Other disorders of skin and subcutaneous tissue related to radiation (ICD-10: L59)                                     | groupL59    |
| ECG, phase time                                                                                                        | n_5986_0_0  |
| Heel quantitative ultrasound index (QUI), manual entry (left)                                                          | n_4139_0_0  |
| Pulse wave peak to peak time                                                                                           | n_4196_0_0  |
| Reason for glasses/contact lenses                                                                                      | n_6147_0_0  |
| Interpolated Age of participant when cancer first diagnosed                                                            | n_20007_0_0 |
| FIS : family relationship calculation                                                                                  | n_4979_0_0  |
| Average acceleration 21:00 - 21:59                                                                                     | n_90048_0_0 |
| Average acceleration 01:00 - 01:59                                                                                     | n_90028_0_0 |
| Fraction acceleration <= 40 milli-gravities                                                                            | n_90115_0_0 |
| Fraction acceleration <= 85 milli-gravities                                                                            | n_90124_0_0 |
| Thyroiditis (ICD-10: E06)                                                                                              | groupE06    |
| Age angina diagnosed                                                                                                   | n_3627_0_0  |
| High light scatter reticulocyte count                                                                                  | n_30300_0_0 |
| Sleeplessness / insomnia                                                                                               | n_1200_0_0  |
| Deficiency of other nutrient elements (ICD-10: E61)                                                                    | groupE61    |
| Benign lipomatous neoplasm (ICD-10: D17)                                                                               | groupD17    |
| Average weekly red wine intake                                                                                         | n_1568_0_0  |
| Types of transport used (excluding work)                                                                               | n_6162_0_0  |
| Intra-ocular pressure, Goldmann-correlated (right)                                                                     | n_5255_0_0  |
| Dentofacial anomalies [including malocclusion] (ICD-10: K07)                                                           | groupK07    |
| Migraine (ICD-10: G43)                                                                                                 | groupG43    |
| 3mm weak meridian (left)                                                                                               | n_5096_0_0  |
| Number of attempts                                                                                                     | n_4291_0_0  |
| Average acceleration 05:00 - 05:59                                                                                     | n_90032_0_0 |
| Fraction acceleration <= 4 milli-gravities                                                                             | n_90095_0_0 |
| Duration to entering value                                                                                             | n_20230_0_0 |
| Fresh fruit intake                                                                                                     | n_1309_0_0  |
| Error tolerance before calibration                                                                                     | n_90159_0_0 |
| Other maternal diseases classifiable elsewhere but complicating pregnancy, childbirth and the puerperium (ICD-10: O99) | groupO99    |
| Calibration coefficients - mean temperature                                                                            | n_90170_0_0 |
| 6mm strong meridian (left)                                                                                             | n_5134_0_0  |
| Cutaneous abscess, furuncle and carbuncle (ICD-10: L02)                                                                | groupL02    |
| Ever had laser treatment for glaucoma or high eye pressure                                                             | n_5327_0_0  |
| 6mm regularity index (left)                                                                                            | n_5162_0_0  |
| Pulse wave Arterial Stiffness index                                                                                    | n_21021_0_0 |
| logMAR, final (right)                                                                                                  | n_5201_0_0  |
| Trunk predicted mass                                                                                                   | n_23130_0_0 |
| Cancer year/age first occurred                                                                                         | n_84_0_0    |
| Number of symbol digit matches attempted                                                                               | n_20195_0_0 |
| Monday average acceleration                                                                                            | n_90019_0_0 |
| Atrial fibrillation and flutter (ICD-10: I48)                                                                          | groupI48    |
| Lymphocyte percentage                                                                                                  | n_30180_0_0 |
| Cough (ICD-10: R05)                                                                                                    | groupR05    |
| Snoring                                                                                                                | n_1210_0_0  |
| Pairs matching completion status                                                                                       | n_20244_0_0 |
| Method of recording time when cancer first diagnosed                                                                   | n_20012_0_0 |
| Contra-indications for spirometry                                                                                      | n_3088_0_0  |
| Which eye(s) affected by presbyopia                                                                                    | n_5610_0_0  |
| Inflammatory disease of uterus, except cervix (ICD-10: N71)                                                            | groupN71    |
| Why reduced smoking                                                                                                    | n_6158_0_0  |
| Bread intake                                                                                                           | n_1438_0_0  |
| Reason for skipping spirometry                                                                                         | n_20042_0_0 |
| Cheese intake                                                                                                          | n_1408_0_0  |
| Coxarthrosis [arthrosis of hip] (ICD-10: M16)                                                                          | groupM16    |
| Wear duration during 10:00 - 10:59                                                                                     | n_90070_0_0 |
| Total errors traversing numeric path (trail #1)                                                                        | n_20247_0_0 |

|                                                                             |              |
|-----------------------------------------------------------------------------|--------------|
| Temperature average                                                         | n_90192_0_0  |
| Skin changes due to chronic exposure to nonionizing radiation (ICD-10: L57) | groupL57     |
| Acanthosis nigricans (ICD-10: L83)                                          | groupL83     |
| Other interstitial pulmonary diseases (ICD-10: J84)                         | groupJ84     |
| op_icd                                                                      | op_icd       |
| Duration to first press of snap-button in each round                        | n_404_0_0    |
| Never eat eggs, dairy, wheat, sugar                                         | n_6144_0_0   |
| Body fat percentage                                                         | n_23099_0_0  |
| 6mm weak meridian angle (right)                                             | n_5101_0_0   |
| Leg fat mass (right)                                                        | n_23112_0_0  |
| Other venous embolism and thrombosis (ICD-10: I82)                          | groupI82     |
| Speech-reception-threshold (SRT) estimate (left)                            | n_20019_0_0  |
| Other disorders of gingiva and edentulous alveolar ridge (ICD-10: K06)      | groupK06     |
| Happiness                                                                   | n_4526_0_0   |
| Loneliness, isolation                                                       | n_2020_0_0   |
| Smoking status                                                              | n_20116_0_0  |
| Fraction acceleration <= 6 milli-gravities                                  | n_90097_0_0  |
| Average weekly fortified wine intake                                        | n_1608_0_0   |
| Leg predicted mass (right)                                                  | n_23114_0_0  |
| Average monthly fortified wine intake                                       | n_4451_0_0   |
| Fraction acceleration <= 45 milli-gravities                                 | n_90116_0_0  |
| Noisy workplace                                                             | n_4825_0_0   |
| Eosinophill percentage                                                      | n_30210_0_0  |
| Smoking/smokers in household                                                | n_1259_0_0   |
| Cylindrical power (left)                                                    | n_5086_0_0   |
| Eosinophill count                                                           | n_30150_0_0  |
| Calibration coefficients - y slope                                          | n_90165_0_0  |
| Fraction acceleration <= 25 milli-gravities                                 | n_90112_0_0  |
| Intracerebral haemorrhage (ICD-10: I61)                                     | groupI61     |
| Tobacco smoking                                                             | n_22506_0_0  |
| 3mm asymmetry angle (right)                                                 | n_5108_0_0   |
| Creatinine (enzymatic) in urine                                             | n_30510_0_0  |
| Whole body fat-free mass                                                    | n_23101_0_0  |
| Weight                                                                      | n_23098_0_0  |
| Heel bone mineral density (BMD) (right)                                     | n_4124_0_0   |
| Gestational diabetes only                                                   | n_4041_0_0   |
| Minimum carotid IMT (intima-medial thickness) at 150 degrees                | n_22673_0_0  |
| Hypospadias (ICD-10: Q54)                                                   | groupQ54     |
| Frequency of stair climbing in last 4 weeks                                 | n_943_0_0    |
| Other disorders of binocular movement (ICD-10: H51)                         | groupH51     |
| Mean corpuscular haemoglobin                                                | n_30050_0_0  |
| Reason for skipping visual acuity (right)                                   | n_20056_0_0  |
| Age stopped smoking                                                         | n_2897_0_0   |
| Bread type/intake (pilot)                                                   | n_10776_0_0  |
| Foreign body in alimentary tract (ICD-10: T18)                              | groupT18     |
| When pairs test completed                                                   | ts_20134_0_0 |
| Status asthmaticus (ICD-10: J46)                                            | groupJ46     |
| Other disorders of carbohydrate metabolism (ICD-10: E74)                    | groupE74     |
| OCT measured (right)                                                        | n_6070_0_0   |
| Other congenital malformations of ear (ICD-10: Q17)                         | groupQ17     |
| Vascular syndromes of brain in cerebrovascular diseases (ICD-10: G46)       | groupG46     |
| Abnormal involuntary movements (ICD-10: R25)                                | groupR25     |
| Fraction acceleration <= 35 milli-gravities                                 | n_90114_0_0  |
| Other noninflammatory disorders of vagina (ICD-10: N89)                     | groupN89     |
| Symptoms and signs concerning food and fluid intake (ICD-10: R63)           | groupR63     |
| Exposure to tobacco smoke at home                                           | n_1269_0_0   |
| Doctor diagnosed chronic bronchitis                                         | n_22129_0_0  |
| Heel broadband ultrasound attenuation (BUA), manual entry (left)            | n_4141_0_0   |
| 3mm cylindrical power (left)                                                | n_5119_0_0   |
| Type of tobacco previously smoked                                           | n_2877_0_0   |
| Average acceleration 16:00 - 16:59                                          | n_90043_0_0  |
| Non-butter spread type details                                              | n_2654_0_0   |
| Age of primiparous women at birth of child                                  | n_3872_0_0   |
| Wear duration during 20:00 - 20:59                                          | n_90080_0_0  |
| Rheumatic mitral valve diseases (ICD-10: I05)                               | groupI05     |
| F17 : synonym                                                               | n_5001_0_0   |
| Open wound of abdomen, lower back and pelvis (ICD-10: S31)                  | groupS31     |
| Data recording errors                                                       | n_90182_0_0  |
| Reason for skipping grip strength (right)                                   | n_20043_0_0  |
| Start of requested wear period                                              | ts_90003_0_0 |
| Fraction acceleration <= 1500 milli-gravities                               | n_90153_0_0  |
| Other local infections of skin and subcutaneous tissue (ICD-10: L08)        | groupL08     |
| Diseases of capillaries (ICD-10: I78)                                       | groupI78     |
| Other anxiety disorders (ICD-10: F41)                                       | groupF41     |
| Chronic tubulo-interstitial nephritis (ICD-10: N11)                         | groupN11     |
| Ethnic background                                                           | n_21000_0_0  |
| Age when periods started (menarche)                                         | n_2714_0_0   |

|                                                                                                   |              |
|---------------------------------------------------------------------------------------------------|--------------|
| op_breast                                                                                         | op_breast    |
| Trunk fat-free mass                                                                               | n_23129_0_0  |
| Diverticular disease of intestine (ICD-10: K57)                                                   | groupK57     |
| op_brain                                                                                          | op_brain     |
| Arm fat mass (left)                                                                               | n_23124_0_0  |
| Unspecified mental retardation (ICD-10: F79)                                                      | groupF79     |
| Which eye(s) affected by other eye condition                                                      | n_5877_0_0   |
| Systolic blood pressure, manual reading                                                           | n_93_0_0     |
| Urethritis and urethral syndrome (ICD-10: N34)                                                    | groupN34     |
| Benign mammary dysplasia (ICD-10: N60)                                                            | groupN60     |
| Long-standing illness, disability or infirmity                                                    | n_2188_0_0   |
| Fracture of rib(s), sternum and thoracic spine (ICD-10: S22)                                      | groupS22     |
| Refractometry result unreliable (left)                                                            | s_5090_0_0   |
| Ankle spacing width (right)                                                                       | n_4119_0_0   |
| Time screen exited                                                                                | ts_4289_0_0  |
| Daytime dozing / sleeping (narcolepsy)                                                            | n_1220_0_0   |
| Other and unspecified injuries of thorax (ICD-10: S29)                                            | groupS29     |
| Dermatophytosis (ICD-10: B35)                                                                     | groupB35     |
| Age emphysema diagnosed by doctor                                                                 | n_22148_0_0  |
| Date of attending assessment centre                                                               | ts_53_0_0    |
| Other disorders of nose and nasal sinuses (ICD-10: J34)                                           | groupJ34     |
| Age at menopause (last menstrual period)                                                          | n_3581_0_0   |
| Endocarditis, valve unspecified (ICD-10: I38)                                                     | groupI38     |
| Age chronic bronchitis diagnosed by doctor                                                        | n_22149_0_0  |
| Abnormal findings on antenatal screening of mother (ICD-10: O28)                                  | groupO28     |
| Past tobacco smoking                                                                              | n_1249_0_0   |
| 6mm strong meridian (right)                                                                       | n_5133_0_0   |
| Non-follicular lymphoma (ICD-10: C83)                                                             | groupC83     |
| Sample rate maximum                                                                               | n_90191_0_0  |
| Other erythematous conditions (ICD-10: L53)                                                       | groupL53     |
| Exposure to tobacco smoke outside home                                                            | n_1279_0_0   |
| Average acceleration 23:00 - 23:59                                                                | n_90050_0_0  |
| logMAR, final (left)                                                                              | n_5208_0_0   |
| Dyspepsia (ICD-10: K30)                                                                           | groupK30     |
| Benign neoplasm of breast (ICD-10: D24)                                                           | groupD24     |
| Non-oily fish intake                                                                              | n_1339_0_0   |
| Other predominantly sexually transmitted diseases, not elsewhere classified (ICD-10: A63)         | groupA63     |
| Method of recording time when non-cancer illness first diagnosed                                  | n_20013_0_0  |
| Dislocation, sprain and strain of joints and ligaments at ankle and foot level (ICD-10: S93)      | groupS93     |
| Dermatitis due to substances taken internally (ICD-10: L27)                                       | groupL27     |
| Maternal smoking around birth                                                                     | n_1787_0_0   |
| Recent medication for bronchiectasis                                                              | n_22174_0_0  |
| Keratitis (ICD-10: H16)                                                                           | groupH16     |
| Malignant neoplasm of liver and intrahepatic bile ducts (ICD-10: C22)                             | groupC22     |
| 3mm cylindrical power angle (left)                                                                | n_5112_0_0   |
| Longest period of depression                                                                      | n_4609_0_0   |
| Car occupant injured in other and unspecified transport accidents (ICD-10: V49)                   | groupV49     |
| Years of bringing up phlegm/sputum/mucus on most days                                             | n_22505_0_0  |
| Readings exceeding +/-8 gravities after calibration                                               | n_90185_0_0  |
| Primarily systemic agents (ICD-10: Y43)                                                           | groupY43     |
| Average monthly champagne plus white wine intake                                                  | n_4418_0_0   |
| Average monthly spirits intake                                                                    | n_4440_0_0   |
| Duration of moderate physical activity (pilot)                                                    | n_10962_0_0  |
| Abnormal serum enzyme levels (ICD-10: R74)                                                        | groupR74     |
| Basophil percentage                                                                               | n_30220_0_0  |
| Body mass index (BMI)                                                                             | n_23104_0_0  |
| Heel bone mineral density (BMD) (left)                                                            | n_4105_0_0   |
| Age stopped smoking cigarettes (current cigar/pipe or previous cigarette smoker)                  | n_6194_0_0   |
| Duration of light DIY                                                                             | n_1021_0_0   |
| Likelihood of resuming smoking                                                                    | n_2936_0_0   |
| Cardiac murmurs and other cardiac sounds (ICD-10: R01)                                            | groupR01     |
| Age asthma diagnosed by doctor                                                                    | n_22147_0_0  |
| Health satisfaction                                                                               | n_4548_0_0   |
| Never eat eggs, dairy, wheat, sugar (pilot)                                                       | n_10855_0_0  |
| Oesophageal varices (ICD-10: I85)                                                                 | groupI85     |
| Heel ultrasound method                                                                            | n_19_0_0     |
| Average acceleration 19:00 - 19:59                                                                | n_90046_0_0  |
| Pain and other conditions associated with female genital organs and menstrual cycle (ICD-10: N94) | groupN94     |
| 3mm regularity index (right)                                                                      | n_5160_0_0   |
| FI10 : arithmetic sequence recognition                                                            | n_20183_0_0  |
| Number of full brothers                                                                           | n_1873_0_0   |
| Ever stopped smoking for 6+ months                                                                | n_2907_0_0   |
| Reticulocyte percentage acquisition time                                                          | ts_30242_0_0 |
| Other eye problems                                                                                | n_2227_0_0   |
| Heel broadband ultrasound attenuation (left)                                                      | n_4101_0_0   |
| Microalbumin in urine result flag                                                                 | s_30505_0_0  |
| Potassium in urine result flag                                                                    | s_30525_0_0  |

|                                                                |              |
|----------------------------------------------------------------|--------------|
| Sodium in urine result flag                                    | s_30535_0_0  |
| Creatinine (enzymatic) in urine acquisition time               | ts_30512_0_0 |
| Potassium in urine acquisition time                            | ts_30522_0_0 |
| Weight method                                                  | n_21_0_0     |
| Spirometry method                                              | n_23_0_0     |
| Sex                                                            | n_31_0_0     |
| Hand grip strength (left)                                      | n_46_0_0     |
| Hand grip strength (right)                                     | n_47_0_0     |
| Heel bone ultrasound T-score, manual entry                     | n_77_0_0     |
| Pulse rate (during blood-pressure measurement)                 | n_95_0_0     |
| Birth weight known                                             | n_120_0_0    |
| Number of self-reported cancers                                | n_134_0_0    |
| Number of self-reported non-cancer illnesses                   | n_135_0_0    |
| Number of times snap-button pressed                            | n_403_0_0    |
| Number of days/week of vigorous physical activity 10+ minutes  | n_904_0_0    |
| Duration of vigorous activity                                  | n_914_0_0    |
| Duration walking for pleasure                                  | n_981_0_0    |
| Frequency of strenuous sports in last 4 weeks                  | n_991_0_0    |
| Frequency of light DIY in last 4 weeks                         | n_1011_0_0   |
| Frequency of friend/family visits                              | n_1031_0_0   |
| Time spent watching television (TV)                            | n_1070_0_0   |
| Drive faster than motorway speed limit                         | n_1100_0_0   |
| Sleep duration                                                 | n_1160_0_0   |
| Getting up in morning                                          | n_1170_0_0   |
| Morning/evening person (chronotype)                            | n_1180_0_0   |
| Nap during day                                                 | n_1190_0_0   |
| Current tobacco smoking                                        | n_1239_0_0   |
| Dried fruit intake                                             | n_1319_0_0   |
| Oily fish intake                                               | n_1329_0_0   |
| Poultry intake                                                 | n_1359_0_0   |
| Lamb/mutton intake                                             | n_1379_0_0   |
| Pork intake                                                    | n_1389_0_0   |
| Milk type used                                                 | n_1418_0_0   |
| Spread type                                                    | n_1428_0_0   |
| Tea intake                                                     | n_1488_0_0   |
| Coffee intake                                                  | n_1498_0_0   |
| Hot drink temperature                                          | n_1518_0_0   |
| Water intake                                                   | n_1528_0_0   |
| Major dietary changes in the last 5 years                      | n_1538_0_0   |
| Alcohol usually taken with meals                               | n_1618_0_0   |
| Alcohol intake versus 10 years previously                      | n_1628_0_0   |
| Country of birth (UK/elsewhere)                                | n_1647_0_0   |
| Breastfed as a baby                                            | n_1677_0_0   |
| Adopted as a child                                             | n_1767_0_0   |
| Part of a multiple birth                                       | n_1777_0_0   |
| Father still alive                                             | n_1797_0_0   |
| Mother still alive                                             | n_1835_0_0   |
| Mother's age                                                   | n_1845_0_0   |
| Mood swings                                                    | n_1920_0_0   |
| Miserableness                                                  | n_1930_0_0   |
| Irritability                                                   | n_1940_0_0   |
| Sensitivity / hurt feelings                                    | n_1950_0_0   |
| Fed-up feelings                                                | n_1960_0_0   |
| Nervous feelings                                               | n_1970_0_0   |
| Worrier / anxious feelings                                     | n_1980_0_0   |
| Tense / 'highly strung'                                        | n_1990_0_0   |
| Suffer from 'nerves'                                           | n_2010_0_0   |
| Guilty feelings                                                | n_2030_0_0   |
| Risk taking                                                    | n_2040_0_0   |
| Frequency of depressed mood in last 2 weeks                    | n_2050_0_0   |
| Frequency of unenthusiasm / disinterest in last 2 weeks        | n_2060_0_0   |
| Frequency of tenseness / restlessness in last 2 weeks          | n_2070_0_0   |
| Frequency of tiredness / lethargy in last 2 weeks              | n_2080_0_0   |
| Seen doctor (GP) for nerves, anxiety, tension or depression    | n_2090_0_0   |
| Seen a psychiatrist for nerves, anxiety, tension or depression | n_2100_0_0   |
| Able to confide                                                | n_2110_0_0   |
| Overall health rating                                          | n_2178_0_0   |
| Wears glasses or contact lenses                                | n_2207_0_0   |
| Hearing difficulty/problems                                    | n_2247_0_0   |
| Hearing difficulty/problems with background noise              | n_2257_0_0   |
| Falls in the last year                                         | n_2296_0_0   |
| Weight change compared with 1 year ago                         | n_2306_0_0   |
| Wheeze or whistling in the chest in last year                  | n_2316_0_0   |
| Chest pain or discomfort                                       | n_2335_0_0   |
| Relative age of first facial hair                              | n_2375_0_0   |
| Relative age voice broke                                       | n_2385_0_0   |
| Hair/balding pattern                                           | n_2395_0_0   |

|                                                                         |            |
|-------------------------------------------------------------------------|------------|
| Number of children fathered                                             | n_2405_0_0 |
| Cancer diagnosed by doctor                                              | n_2453_0_0 |
| Fractured/broken bones in last 5 years                                  | n_2463_0_0 |
| Other serious medical condition/disability diagnosed by doctor          | n_2473_0_0 |
| Taking other prescription medications                                   | n_2492_0_0 |
| Frequency of heavy DIY in last 4 weeks                                  | n_2624_0_0 |
| Duration of heavy DIY                                                   | n_2634_0_0 |
| Ever had breast cancer screening / mammogram                            | n_2674_0_0 |
| Ever had cervical smear test                                            | n_2694_0_0 |
| Had menopause                                                           | n_2724_0_0 |
| Ever had stillbirth, spontaneous miscarriage or termination             | n_2774_0_0 |
| Ever taken oral contraceptive pill                                      | n_2784_0_0 |
| Ever used hormone-replacement therapy (HRT)                             | n_2814_0_0 |
| Bilateral oophorectomy (both ovaries removed)                           | n_2834_0_0 |
| Age started smoking in former smokers                                   | n_2867_0_0 |
| Number of unsuccessful stop-smoking attempts                            | n_2926_0_0 |
| General pain for 3+ months                                              | n_2956_0_0 |
| Fracture resulting from simple fall                                     | n_3005_0_0 |
| Ordering of blows                                                       | n_3065_0_0 |
| Foot measured for bone density                                          | n_3081_0_0 |
| Fractured heel                                                          | n_3082_0_0 |
| Heel quantitative ultrasound index (QUI), manual entry                  | n_3083_0_0 |
| Heel Broadband ultrasound attenuation (BUA), manual entry               | n_3085_0_0 |
| Caffeine drink within last hour                                         | n_3089_0_0 |
| Used an inhaler for chest within last hour                              | n_3090_0_0 |
| Number of measurements made                                             | n_3137_0_0 |
| Pregnant                                                                | n_3140_0_0 |
| Heel quantitative ultrasound index (QUI), direct entry                  | n_3147_0_0 |
| Heel bone mineral density (BMD)                                         | n_3148_0_0 |
| Hearing aid user                                                        | n_3393_0_0 |
| Neck/shoulder pain for 3+ months                                        | n_3404_0_0 |
| Hip pain for 3+ months                                                  | n_3414_0_0 |
| Age started smoking in current smokers                                  | n_3436_0_0 |
| Type of tobacco currently smoked                                        | n_3446_0_0 |
| Number of cigarettes currently smoked daily (current cigarette smokers) | n_3456_0_0 |
| Difficulty not smoking for 1 day                                        | n_3476_0_0 |
| Ever tried to stop smoking                                              | n_3486_0_0 |
| Wants to stop smoking                                                   | n_3496_0_0 |
| Smoking compared to 10 years previous                                   | n_3506_0_0 |
| Chest pain or discomfort walking normally                               | n_3606_0_0 |
| Frequency of other exercises in last 4 weeks                            | n_3637_0_0 |
| Age when last ate meat                                                  | n_3680_0_0 |
| Time since last menstrual period                                        | n_3700_0_0 |
| Length of menstrual cycle                                               | n_3710_0_0 |
| Menstruating today                                                      | n_3720_0_0 |
| Former alcohol drinker                                                  | n_3731_0_0 |
| Stomach/abdominal pain for 3+ months                                    | n_3741_0_0 |
| Knee pain for 3+ months                                                 | n_3773_0_0 |
| Headaches for 3+ months                                                 | n_3799_0_0 |
| Number of stillbirths                                                   | n_3829_0_0 |
| Number of spontaneous miscarriages                                      | n_3839_0_0 |
| Number of pregnancy terminations                                        | n_3849_0_0 |
| Reason former drinker stopped drinking alcohol                          | n_3859_0_0 |
| Age at bilateral oophorectomy (both ovaries removed)                    | n_3882_0_0 |
| Age heart attack diagnosed                                              | n_3894_0_0 |
| Adopted father still alive                                              | n_3912_0_0 |
| Adopted mother still alive                                              | n_3942_0_0 |
| Number of adopted brothers                                              | n_3972_0_0 |
| Number of adopted sisters                                               | n_3982_0_0 |
| Age emphysema/chronic bronchitis diagnosed                              | n_3992_0_0 |
| Age pulmonary embolism (blood clot in lung) diagnosed                   | n_4022_0_0 |
| Age stroke diagnosed                                                    | n_4056_0_0 |
| Diastolic blood pressure, automated reading                             | n_4079_0_0 |
| Heel ultrasound method (left)                                           | n_4092_0_0 |
| Fractured heel (left)                                                   | n_4093_0_0 |
| Heel ultrasound method (right)                                          | n_4095_0_0 |
| Fractured heel (right)                                                  | n_4096_0_0 |
| Heel quantitative ultrasound index (QUI), direct entry (left)           | n_4104_0_0 |
| Heel bone mineral density (BMD) T-score, automated (left)               | n_4106_0_0 |
| Heel broadband ultrasound attenuation (right)                           | n_4120_0_0 |
| Heel quantitative ultrasound index (QUI), direct entry (right)          | n_4123_0_0 |
| Heel bone mineral density (BMD) T-score, automated (right)              | n_4125_0_0 |
| Heel bone mineral density (BMD) T-score, manual entry (left)            | n_4138_0_0 |
| Heel bone mineral density (BMD), manual entry (left)                    | n_4140_0_0 |
| Heel bone mineral density (BMD) T-score, manual entry (right)           | n_4143_0_0 |
| Heel quantitative ultrasound index (QUI), manual entry (right)          | n_4144_0_0 |
| Heel bone mineral density (BMD), manual entry (right)                   | n_4145_0_0 |

|                                                                   |            |
|-------------------------------------------------------------------|------------|
| Heel broadband ultrasound attenuation (BUA), manual entry (right) | n_4146_0_0 |
| Stiffness method                                                  | n_4186_0_0 |
| Pulse rate                                                        | n_4194_0_0 |
| Number entered by participant                                     | s_4258_0_0 |
| Digits entered correctly                                          | n_4259_0_0 |
| Completion status (left)                                          | n_4268_0_0 |
| Number of triplets attempted (left)                               | n_4269_0_0 |
| Volume level set by participant (left)                            | n_4270_0_0 |
| Completion status (right)                                         | n_4275_0_0 |
| Number of triplets attempted (right)                              | n_4276_0_0 |
| Volume level set by participant (right)                           | n_4277_0_0 |
| Completion status of numeric memory test                          | n_4281_0_0 |
| Maximum digits remembered correctly                               | n_4282_0_0 |
| Test completion status                                            | n_4287_0_0 |
| Time to answer                                                    | n_4288_0_0 |
| PM: initial answer                                                | n_4292_0_0 |
| PM: final answer                                                  | n_4293_0_0 |
| Final attempt correct                                             | n_4294_0_0 |
| History of attempts                                               | s_4295_0_0 |
| Average monthly red wine intake                                   | n_4407_0_0 |
| Average monthly beer plus cider intake                            | n_4429_0_0 |
| Average monthly intake of other alcoholic drinks                  | n_4462_0_0 |
| Non-accidental death in close genetic family                      | n_4501_0_0 |
| Work/job satisfaction                                             | n_4537_0_0 |
| Family relationship satisfaction                                  | n_4559_0_0 |
| Friendships satisfaction                                          | n_4570_0_0 |
| Financial situation satisfaction                                  | n_4581_0_0 |
| Ever depressed for a whole week                                   | n_4598_0_0 |
| Number of depression episodes                                     | n_4620_0_0 |
| Ever unenthusiastic/disinterested for a whole week                | n_4631_0_0 |
| Ever manic/hyper for 2 days                                       | n_4642_0_0 |
| Ever highly irritable/argumentative for 2 days                    | n_4653_0_0 |
| Shortness of breath walking on level ground                       | n_4717_0_0 |
| Leg pain on walking                                               | n_4728_0_0 |
| Cochlear implant                                                  | n_4792_0_0 |
| Tinnitus                                                          | n_4803_0_0 |
| Tinnitus severity/nuisance                                        | n_4814_0_0 |
| Loud music exposure frequency                                     | n_4836_0_0 |
| Hearing test done                                                 | n_4849_0_0 |
| Attempted fluid intelligence (FI) test.                           | n_4924_0_0 |
| FI1 : numeric addition test                                       | n_4935_0_0 |
| FI2 : identify largest number                                     | n_4946_0_0 |
| FI3 : word interpolation                                          | n_4957_0_0 |
| FI4 : positional arithmetic                                       | n_4968_0_0 |
| FI6 : conditional arithmetic                                      | n_4990_0_0 |
| FI8 : chained arithmetic                                          | n_5012_0_0 |
| Number of older siblings                                          | n_5057_0_0 |
| Cylindrical power (right)                                         | n_5087_0_0 |
| Astigmatism angle (right)                                         | n_5088_0_0 |
| 3mm weak meridian angle (right)                                   | n_5100_0_0 |
| 6mm weak meridian angle (left)                                    | n_5102_0_0 |
| 3mm weak meridian angle (left)                                    | n_5103_0_0 |
| 3mm strong meridian angle (left)                                  | n_5104_0_0 |
| 3mm strong meridian angle (right)                                 | n_5107_0_0 |
| 6mm asymmetry angle (left)                                        | n_5110_0_0 |
| 3mm asymmetry angle (left)                                        | n_5111_0_0 |
| 6mm cylindrical power angle (left)                                | n_5113_0_0 |
| 6mm cylindrical power angle (right)                               | n_5114_0_0 |
| 3mm cylindrical power angle (right)                               | n_5115_0_0 |
| 3mm cylindrical power (right)                                     | n_5116_0_0 |
| 6mm cylindrical power (right)                                     | n_5117_0_0 |
| 6mm cylindrical power (left)                                      | n_5118_0_0 |
| 3mm keratometry result unreliable (left)                          | s_5136_0_0 |
| 6mm keratometry result unreliable (left)                          | s_5138_0_0 |
| 6mm keratometry result unreliable (right)                         | s_5139_0_0 |
| 3mm keratometry result unreliable (right)                         | s_5140_0_0 |
| 3mm asymmetry index unreliable (left)                             | s_5141_0_0 |
| 6mm asymmetry index unreliable (left)                             | s_5142_0_0 |
| 6mm asymmetry index unreliable (right)                            | s_5143_0_0 |
| 3mm asymmetry index unreliable (right)                            | s_5144_0_0 |
| 3mm regularity index unreliable (right)                           | s_5145_0_0 |
| 6mm regularity index unreliable (right)                           | s_5146_0_0 |
| 6mm regularity index unreliable (left)                            | s_5147_0_0 |
| 3mm regularity index unreliable (left)                            | s_5148_0_0 |
| 3mm regularity index for irregular astigmatism level (left)       | n_5149_0_0 |
| 3mm asymmetry index for irregular astigmatism level (right)       | n_5152_0_0 |
| 3mm asymmetry index for irregular astigmatism level (left)        | n_5155_0_0 |

|                                                                       |            |
|-----------------------------------------------------------------------|------------|
| 3mm asymmetry index (left)                                            | n_5156_0_0 |
| 3mm asymmetry index (right)                                           | n_5159_0_0 |
| 6mm regularity index (right)                                          | n_5161_0_0 |
| 3mm regularity index for irregular astigmatism level (right)          | n_5164_0_0 |
| Ever had eye surgery                                                  | n_5181_0_0 |
| Both eyes present                                                     | n_5182_0_0 |
| Current eye infection                                                 | n_5183_0_0 |
| Visual acuity measured (right)                                        | n_5185_0_0 |
| Visual acuity measured (left)                                         | n_5187_0_0 |
| Auto-refraction method (right)                                        | n_5189_0_0 |
| Auto-refraction method (left)                                         | n_5191_0_0 |
| Intra-ocular pressure (IOP) method (right)                            | n_5194_0_0 |
| Intra-ocular pressure (IOP) method (left)                             | n_5196_0_0 |
| Index of best refractometry result (right)                            | n_5221_0_0 |
| 3mm index of best keratometry results (right)                         | n_5237_0_0 |
| 6mm index of best keratometry results (right)                         | n_5251_0_0 |
| Corneal resistance factor (right)                                     | n_5257_0_0 |
| Vertex distance (left)                                                | n_5274_0_0 |
| 3mm index of best keratometry results (left)                          | n_5292_0_0 |
| 6mm index of best keratometry results (left)                          | n_5306_0_0 |
| Ever had cataract surgery                                             | n_5324_0_0 |
| Ever had refractive laser eye surgery                                 | n_5325_0_0 |
| Ever had surgery for glaucoma or high eye pressure                    | n_5326_0_0 |
| Ever had corneal graft surgery                                        | n_5328_0_0 |
| Average weekly intake of other alcoholic drinks                       | n_5364_0_0 |
| Longest period of unenthusiasm / disinterest                          | n_5375_0_0 |
| Number of unenthusiastic/disinterested episodes                       | n_5386_0_0 |
| Which eye(s) affected by injury or trauma resulting in loss of vision | n_5419_0_0 |
| Age when loss of vision due to injury or trauma diagnosed             | n_5430_0_0 |
| Which eye(s) are affected by cataract                                 | n_5441_0_0 |
| Leg pain when standing still or sitting                               | n_5452_0_0 |
| Leg pain in calf/calves                                               | n_5463_0_0 |
| Leg pain when walking normally                                        | n_5485_0_0 |
| Leg pain when walking ever disappears while walking                   | n_5496_0_0 |
| Leg pain on walking : effect of standing still                        | n_5518_0_0 |
| Surgery/amputation of toe or leg                                      | n_5540_0_0 |
| FI9 : concept interpolation                                           | n_5556_0_0 |
| Length of longest manic/irritable episode                             | n_5663_0_0 |
| Severity of manic/irritable episodes                                  | n_5674_0_0 |
| FI10 : arithmetic sequence recognition                                | n_5699_0_0 |
| FI11 : antonym                                                        | n_5779_0_0 |
| FI12 : square sequence recognition                                    | n_5790_0_0 |
| Which eye(s) affected by hypermetropia (long sight)                   | n_5832_0_0 |
| Which eye(s) affected by myopia (short sight)                         | n_5843_0_0 |
| Which eye(s) affected by astigmatism                                  | n_5855_0_0 |
| FI13 : subset inclusion logic                                         | n_5866_0_0 |
| Which eye(s) affected by diabetes-related eye disease                 | n_5890_0_0 |
| Age when diabetes-related eye disease diagnosed                       | n_5901_0_0 |
| Which eye(s) affected by macular degeneration                         | n_5912_0_0 |
| Age macular degeneration diagnosed                                    | n_5923_0_0 |
| Which eye(s) affected by other serious eye condition                  | n_5934_0_0 |
| Age other serious eye condition diagnosed                             | n_5945_0_0 |
| Previously smoked cigarettes on most/all days                         | n_5959_0_0 |
| ECG, heart rate                                                       | n_5983_0_0 |
| ECG, trend phase name                                                 | s_5987_0_0 |
| ECG, stage name                                                       | s_5988_0_0 |
| ECG, phase name                                                       | s_5991_0_0 |
| ECG, phase duration                                                   | n_5992_0_0 |
| ECG, number of stages in a phase                                      | n_5993_0_0 |
| Doctor restricts physical activity due to heart condition             | n_6014_0_0 |
| Chest pain felt during physical activity                              | n_6015_0_0 |
| Chest pain felt outside physical activity                             | n_6016_0_0 |
| Able to walk or cycle unaided for 10 minutes                          | n_6017_0_0 |
| Completion status of test                                             | n_6020_0_0 |
| Program category                                                      | n_6024_0_0 |
| Maximum workload during fitness test                                  | n_6032_0_0 |
| Maximum heart rate during fitness test                                | n_6033_0_0 |
| Target heart rate achieved                                            | n_6034_0_0 |
| Number of trend entries                                               | n_6038_0_0 |
| Duration of fitness test                                              | n_6039_0_0 |
| OCT measured (left)                                                   | n_6072_0_0 |
| Glasses worn/required (right)                                         | n_6074_0_0 |
| Glasses worn/required (left)                                          | n_6075_0_0 |
| Which eye(s) affected by glaucoma                                     | n_6119_0_0 |
| Illness, injury, bereavement, stress in last 2 years                  | n_6145_0_0 |
| Eye problems/disorders                                                | n_6148_0_0 |
| Fractured bone site(s)                                                | n_6151_0_0 |

|                                                                                               |             |
|-----------------------------------------------------------------------------------------------|-------------|
| Blood clot, DVT, bronchitis, emphysema, asthma, rhinitis, eczema, allergy diagnosed by doctor | n_6152_0_0  |
| Medication for cholesterol, blood pressure, diabetes, or take exogenous hormones              | n_6153_0_0  |
| Medication for pain relief, constipation, heartburn                                           | n_6154_0_0  |
| Vitamin and mineral supplements                                                               | n_6155_0_0  |
| Manic/hyper symptoms                                                                          | n_6156_0_0  |
| Pain type(s) experienced in last month                                                        | n_6159_0_0  |
| Medication for cholesterol, blood pressure or diabetes                                        | n_6177_0_0  |
| Number of cigarettes previously smoked daily (current cigar/pipe smokers)                     | n_6183_0_0  |
| Which eye(s) affected by strabismus (squint)                                                  | n_6205_0_0  |
| Medication for pain relief, constipation, heartburn (pilot)                                   | n_10004_0_0 |
| Medication for smoking cessation, constipation, heartburn, allergies (pilot)                  | n_10005_0_0 |
| Mouth/teeth dental problems (pilot)                                                           | n_10006_0_0 |
| Vitamin and mineral supplements (pilot)                                                       | n_10007_0_0 |
| Why stopped smoking (pilot)                                                                   | n_10115_0_0 |
| Type of progestan-only oral contraceptive used (pilot)                                        | n_10132_0_0 |
| Number of times snap-button pressed (pilot)                                                   | n_10141_0_0 |
| Duration to first press of snap-button in each round (pilot)                                  | n_10147_0_0 |
| Words answer array (pilot)                                                                    | n_10609_0_0 |
| Word count (pilot)                                                                            | n_10610_0_0 |
| Number of words beginning with 'S' (pilot)                                                    | n_10612_0_0 |
| Spirometry method (pilot)                                                                     | n_10711_0_0 |
| Illness, injury, bereavement, stress in last 2 years (pilot)                                  | n_10721_0_0 |
| Qualifications (pilot)                                                                        | n_10722_0_0 |
| Vitamin supplements (pilot)                                                                   | n_10723_0_0 |
| Frequency of friend/family visits (pilot)                                                     | n_10740_0_0 |
| Spread type (pilot)                                                                           | n_10767_0_0 |
| Hearing difficulty/problems (pilot)                                                           | n_10793_0_0 |
| Ever stopped smoking for 6+ months (pilot)                                                    | n_10827_0_0 |
| Gestational diabetes only (pilot)                                                             | n_10844_0_0 |
| Reason former drinker stopped drinking alcohol (pilot)                                        | n_10853_0_0 |
| Other dietary supplements (pilot)                                                             | n_10854_0_0 |
| Average total household income before tax (pilot)                                             | n_10877_0_0 |
| Light smokers, at least 100 smokes in lifetime (pilot)                                        | n_10895_0_0 |
| Variation in diet (pilot)                                                                     | n_10912_0_0 |
| Duration of walks (pilot)                                                                     | n_10953_0_0 |
| Duration of vigorous physical activity (pilot)                                                | n_10971_0_0 |
| Cancer code, self-reported                                                                    | n_20001_0_0 |
| Non-cancer illness code, self-reported                                                        | n_20002_0_0 |
| Treatment/medication code                                                                     | n_20003_0_0 |
| Interpolated Year when cancer first diagnosed                                                 | n_20006_0_0 |
| Interpolated Year when non-cancer illness first diagnosed                                     | n_20008_0_0 |
| Sitting height                                                                                | n_20015_0_0 |
| Fluid intelligence score                                                                      | n_20016_0_0 |
| Prospective memory result                                                                     | n_20018_0_0 |
| Reason for skipping weight                                                                    | n_20041_0_0 |
| Reason for skipping grip strength (left)                                                      | n_20044_0_0 |
| Reason for skipping waist                                                                     | n_20045_0_0 |
| Reason for skipping hip measurement                                                           | n_20046_0_0 |
| Reason for skipping standing height                                                           | n_20047_0_0 |
| Reason for skipping sitting height                                                            | n_20048_0_0 |
| Reason for skipping arterial stiffness                                                        | n_20051_0_0 |
| Reason for skipping refractometry (left)                                                      | n_20052_0_0 |
| Reason for skipping IOP (right)                                                               | n_20053_0_0 |
| Reason for skipping IOP (left)                                                                | n_20054_0_0 |
| Reason for skipping refractometry (right)                                                     | n_20055_0_0 |
| Reason for skipping visual acuity (left)                                                      | n_20057_0_0 |
| Reason for skipping ECG                                                                       | n_20058_0_0 |
| Reason ECG not completed                                                                      | n_20059_0_0 |
| Reason at-rest ECG performed without bicycle                                                  | n_20060_0_0 |
| Reason for skipping OCT (right)                                                               | n_20061_0_0 |
| Reason for skipping OCT (left)                                                                | n_20062_0_0 |
| Illnesses of father                                                                           | n_20107_0_0 |
| Illnesses of mother                                                                           | n_20110_0_0 |
| Illnesses of siblings                                                                         | n_20111_0_0 |
| Illnesses of adopted father                                                                   | n_20112_0_0 |
| Illnesses of adopted mother                                                                   | n_20113_0_0 |
| Illnesses of adopted siblings                                                                 | n_20114_0_0 |
| Alcohol drinker status                                                                        | n_20117_0_0 |
| Cascot confidence score                                                                       | n_20121_0_0 |
| Bipolar disorder status                                                                       | n_20122_0_0 |
| Bipolar and major depression status                                                           | n_20126_0_0 |
| Number of fluid intelligence questions attempted within time limit                            | n_20128_0_0 |
| Number of correct matches in round                                                            | n_20131_0_0 |
| Number of incorrect matches in round                                                          | n_20132_0_0 |
| Forced expiratory volume in 1-second (FEV1), Best measure                                     | n_20150_0_0 |
| Reproducibility of spirometry measurement using ERS/ATS criteria                              | n_20152_0_0 |
| Duration to complete alphanumeric path (trail #2)                                             | n_20157_0_0 |



|                                                                     |             |
|---------------------------------------------------------------------|-------------|
| Number of symbol digit matches made correctly                       | n_20159_0_0 |
| Ever smoked                                                         | n_20160_0_0 |
| FI1 : numeric addition test                                         | n_20165_0_0 |
| FI2 : identify largest number                                       | n_20167_0_0 |
| FI3 : word interpolation                                            | n_20169_0_0 |
| FI4 : positional arithmetic                                         | n_20171_0_0 |
| FI5 : family relationship calculation                               | n_20173_0_0 |
| FI6 : conditional arithmetic                                        | n_20175_0_0 |
| FI7 : synonym                                                       | n_20177_0_0 |
| FI8 : chained arithmetic                                            | n_20179_0_0 |
| FI9 : concept interpolation                                         | n_20181_0_0 |
| FI11 : antonym                                                      | n_20185_0_0 |
| FI12 : square sequence recognition                                  | n_20187_0_0 |
| FI13 : subset inclusion logic                                       | n_20189_0_0 |
| Fluid intelligence score                                            | n_20191_0_0 |
| FI14 : alphanumeric substitution                                    | n_20193_0_0 |
| Code array presented                                                | n_20196_0_0 |
| Value entered                                                       | n_20229_0_0 |
| Maximum digits remembered correctly                                 | n_20240_0_0 |
| Fluid intelligence completion status                                | n_20242_0_0 |
| Symbol digit completion status                                      | n_20245_0_0 |
| Trail making completion status                                      | n_20246_0_0 |
| Total errors traversing alphanumeric path (trail #2)                | n_20248_0_0 |
| Doctor diagnosed hayfever or allergic rhinitis                      | n_22126_0_0 |
| Doctor diagnosed asthma                                             | n_22127_0_0 |
| Doctor diagnosed emphysema                                          | n_22128_0_0 |
| Doctor diagnosed COPD (chronic obstructive pulmonary disease)       | n_22130_0_0 |
| Doctor diagnosed cystic fibrosis                                    | n_22131_0_0 |
| Doctor diagnosed alpha-1 antitrypsin deficiency                     | n_22132_0_0 |
| Doctor diagnosed sarcoidosis                                        | n_22133_0_0 |
| Doctor diagnosed bronchiectasis                                     | n_22134_0_0 |
| Doctor diagnosed idiopathic pulmonary fibrosis                      | n_22135_0_0 |
| Doctor diagnosed fibrosing alveolitis/unspecified alveolitis        | n_22136_0_0 |
| Doctor diagnosed tuberculosis                                       | n_22137_0_0 |
| Doctor diagnosed silicosis                                          | n_22138_0_0 |
| Doctor diagnosed asbestosis                                         | n_22139_0_0 |
| Doctor diagnosed lung cancer (not mesothelioma)                     | n_22140_0_0 |
| Doctor diagnosed mesothelioma of the lung                           | n_22141_0_0 |
| Age hayfever or allergic rhinitis diagnosed by doctor               | n_22146_0_0 |
| Age cystic fibrosis diagnosed by doctor                             | n_22151_0_0 |
| Age alpha-1 antitrypsin deficiency diagnosed by doctor              | n_22152_0_0 |
| Age sarcoidosis diagnosed by doctor                                 | n_22153_0_0 |
| Age bronchiectasis diagnosed by doctor                              | n_22154_0_0 |
| Age idiopathic pulmonary fibrosis diagnosed by doctor               | n_22155_0_0 |
| Age fibrosing alveolitis/unspecified alveolitis diagnosed by doctor | n_22156_0_0 |
| Age tuberculosis diagnosed by doctor                                | n_22157_0_0 |
| Age silicosis diagnosed by doctor                                   | n_22158_0_0 |
| Age asbestosis diagnosed by doctor                                  | n_22159_0_0 |
| Age lung cancer (not mesothelioma) diagnosed by doctor              | n_22160_0_0 |
| Age mesothelioma of the lung diagnosed by doctor                    | n_22161_0_0 |
| Recent medication for hayfever or allergic rhinitis                 | n_22166_0_0 |
| Recent medication for asthma                                        | n_22167_0_0 |
| Recent medication for emphysema                                     | n_22168_0_0 |
| Recent medication for chronic bronchitis                            | n_22169_0_0 |
| Recent medication for COPD (Chronic Obstructive Pulmonary Disease)  | n_22170_0_0 |
| Recent medication for cystic fibrosis                               | n_22171_0_0 |
| Recent medication for alpha-1 antitrypsin deficiency                | n_22172_0_0 |
| Recent medication for sarcoidosis                                   | n_22173_0_0 |
| Recent medication for idiopathic pulmonary fibrosis                 | n_22175_0_0 |
| Recent medication for fibrosing alveolitis/unspecified alveolitis   | n_22176_0_0 |
| Recent medication for tuberculosis                                  | n_22177_0_0 |
| Recent medication for silicosis                                     | n_22178_0_0 |
| Recent medication for asbestosis                                    | n_22179_0_0 |
| Recent medication for lung cancer (not mesothelioma)                | n_22180_0_0 |
| Recent medication for mesothelioma of the lung                      | n_22181_0_0 |
| Cough on most days                                                  | n_22502_0_0 |
| Years of cough on most days                                         | n_22503_0_0 |
| Bring up phlegm/sputum/mucus on most days                           | n_22504_0_0 |
| Age of stopping smoking                                             | n_22507_0_0 |
| Amount of tobacco currently smoked                                  | n_22508_0_0 |
| Minimum carotid IMT (intima-medial thickness) at 120 degrees        | n_22670_0_0 |
| Mean carotid IMT (intima-medial thickness) at 120 degrees           | n_22671_0_0 |
| Maximum carotid IMT (intima-medial thickness) at 120 degrees        | n_22672_0_0 |
| Mean carotid IMT (intima-medial thickness) at 150 degrees           | n_22674_0_0 |
| Maximum carotid IMT (intima-medial thickness) at 150 degrees        | n_22675_0_0 |
| Minimum carotid IMT (intima-medial thickness) at 210 degrees        | n_22676_0_0 |
| Mean carotid IMT (intima-medial thickness) at 210 degrees           | n_22677_0_0 |

|                                                                   |             |
|-------------------------------------------------------------------|-------------|
| Maximum carotid IMT (intima-medial thickness) at 210 degrees      | n_22678_0_0 |
| Minimum carotid IMT (intima-medial thickness) at 240 degrees      | n_22679_0_0 |
| Mean carotid IMT (intima-medial thickness) at 240 degrees         | n_22680_0_0 |
| Maximum carotid IMT (intima-medial thickness) at 240 degrees      | n_22681_0_0 |
| Quality control indicator for IMT at 120 degrees                  | n_22682_0_0 |
| Quality control indicator for IMT at 150 degrees                  | n_22683_0_0 |
| Quality control indicator for IMT at 210 degrees                  | n_22684_0_0 |
| Quality control indicator for IMT at 240 degrees                  | n_22685_0_0 |
| Whole body fat mass                                               | n_23100_0_0 |
| Whole body water mass                                             | n_23102_0_0 |
| Basal metabolic rate                                              | n_23105_0_0 |
| Leg fat mass (left)                                               | n_23116_0_0 |
| Leg fat-free mass (left)                                          | n_23117_0_0 |
| Leg predicted mass (left)                                         | n_23118_0_0 |
| Arm fat-free mass (right)                                         | n_23121_0_0 |
| Arm predicted mass (right)                                        | n_23122_0_0 |
| Arm fat percentage (left)                                         | n_23123_0_0 |
| Arm fat-free mass (left)                                          | n_23125_0_0 |
| Arm predicted mass (left)                                         | n_23126_0_0 |
| White blood cell (leukocyte) count acquisition route              | n_30004_0_0 |
| Red blood cell (erythrocyte) count device ID                      | s_30013_0_0 |
| Red blood cell (erythrocyte) count acquisition route              | n_30014_0_0 |
| Haemoglobin concentration device ID                               | s_30023_0_0 |
| Haemoglobin concentration acquisition route                       | n_30024_0_0 |
| Haematocrit percentage device ID                                  | s_30033_0_0 |
| Haematocrit percentage acquisition route                          | n_30034_0_0 |
| Mean corpuscular volume device ID                                 | s_30043_0_0 |
| Mean corpuscular volume acquisition route                         | n_30044_0_0 |
| Mean corpuscular haemoglobin device ID                            | s_30053_0_0 |
| Mean corpuscular haemoglobin acquisition route                    | n_30054_0_0 |
| Mean corpuscular haemoglobin concentration device ID              | s_30063_0_0 |
| Mean corpuscular haemoglobin concentration acquisition route      | n_30064_0_0 |
| Red blood cell (erythrocyte) distribution width device ID         | s_30073_0_0 |
| Red blood cell (erythrocyte) distribution width acquisition route | n_30074_0_0 |
| Platelet count device ID                                          | s_30083_0_0 |
| Platelet count acquisition route                                  | n_30084_0_0 |
| Platelet crit device ID                                           | s_30093_0_0 |
| Platelet crit acquisition route                                   | n_30094_0_0 |
| Mean platelet (thrombocyte) volume device ID                      | s_30103_0_0 |
| Mean platelet (thrombocyte) volume acquisition route              | n_30104_0_0 |
| Platelet distribution width device ID                             | s_30113_0_0 |
| Platelet distribution width acquisition route                     | n_30114_0_0 |
| Lymphocyte count device ID                                        | s_30123_0_0 |
| Lymphocyte count acquisition route                                | n_30124_0_0 |
| Monocyte count device ID                                          | s_30133_0_0 |
| Monocyte count acquisition route                                  | n_30134_0_0 |
| Neutrophill count device ID                                       | s_30143_0_0 |
| Neutrophill count acquisition route                               | n_30144_0_0 |
| Eosinophill count device ID                                       | s_30153_0_0 |
| Eosinophill count acquisition route                               | n_30154_0_0 |
| Basophill count device ID                                         | s_30163_0_0 |
| Basophill count acquisition route                                 | n_30164_0_0 |
| Nucleated red blood cell count                                    | n_30170_0_0 |
| Nucleated red blood cell count device ID                          | s_30173_0_0 |
| Nucleated red blood cell count acquisition route                  | n_30174_0_0 |
| Lymphocyte percentage device ID                                   | s_30183_0_0 |
| Lymphocyte percentage acquisition route                           | n_30184_0_0 |
| Monocyte percentage device ID                                     | s_30193_0_0 |
| Monocyte percentage acquisition route                             | n_30194_0_0 |
| Neutrophill percentage device ID                                  | s_30203_0_0 |
| Neutrophill percentage acquisition route                          | n_30204_0_0 |
| Eosinophill percentage device ID                                  | s_30213_0_0 |
| Eosinophill percentage acquisition route                          | n_30214_0_0 |
| Basophill percentage device ID                                    | s_30223_0_0 |
| Basophill percentage acquisition route                            | n_30224_0_0 |
| Nucleated red blood cell percentage                               | n_30230_0_0 |
| Nucleated red blood cell percentage device ID                     | s_30233_0_0 |
| Nucleated red blood cell percentage acquisition route             | n_30234_0_0 |
| Reticulocyte percentage                                           | n_30240_0_0 |
| Reticulocyte percentage device ID                                 | s_30243_0_0 |
| Reticulocyte percentage acquisition route                         | n_30244_0_0 |
| Reticulocyte count                                                | n_30250_0_0 |
| Reticulocyte count device ID                                      | s_30253_0_0 |
| Reticulocyte count acquisition route                              | n_30254_0_0 |
| Mean reticulocyte volume                                          | n_30260_0_0 |
| Mean reticulocyte volume device ID                                | s_30263_0_0 |
| Mean reticulocyte volume acquisition route                        | n_30264_0_0 |

|                                                                          |             |
|--------------------------------------------------------------------------|-------------|
| Mean spheroid cell volume                                                | n_30270_0_0 |
| Mean spheroid cell volume device ID                                      | s_30273_0_0 |
| Mean spheroid cell volume acquisition route                              | n_30274_0_0 |
| Immature reticulocyte fraction device ID                                 | s_30283_0_0 |
| Immature reticulocyte fraction acquisition route                         | n_30284_0_0 |
| High light scatter reticulocyte percentage device ID                     | s_30293_0_0 |
| High light scatter reticulocyte percentage acquisition route             | n_30294_0_0 |
| High light scatter reticulocyte count device ID                          | s_30303_0_0 |
| High light scatter reticulocyte count acquisition route                  | n_30304_0_0 |
| Acceleration data - cwa format                                           | s_90001_0_0 |
| Data problem indicator                                                   | n_90002_0_0 |
| Overall acceleration average                                             | n_90012_0_0 |
| Standard deviation of acceleration                                       | n_90013_0_0 |
| Data quality, good wear time                                             | n_90015_0_0 |
| Data quality, good calibration                                           | n_90016_0_0 |
| Data quality, calibrated on own data                                     | n_90017_0_0 |
| Daylight savings crossover                                               | n_90018_0_0 |
| Tuesday average acceleration                                             | n_90020_0_0 |
| Wednesday average acceleration                                           | n_90021_0_0 |
| Thursday average acceleration                                            | n_90022_0_0 |
| Friday average acceleration                                              | n_90023_0_0 |
| Saturday average acceleration                                            | n_90024_0_0 |
| Sunday average acceleration                                              | n_90025_0_0 |
| First weekday of wear                                                    | n_90026_0_0 |
| Average acceleration 02:00 - 02:59                                       | n_90029_0_0 |
| Average acceleration 03:00 - 03:59                                       | n_90030_0_0 |
| Average acceleration 04:00 - 04:59                                       | n_90031_0_0 |
| Average acceleration 06:00 - 06:59                                       | n_90033_0_0 |
| Average acceleration 08:00 - 08:59                                       | n_90035_0_0 |
| Average acceleration 09:00 - 09:59                                       | n_90036_0_0 |
| Average acceleration 10:00 - 10:59                                       | n_90037_0_0 |
| Average acceleration 11:00 - 11:59                                       | n_90038_0_0 |
| Average acceleration 14:00 - 14:59                                       | n_90041_0_0 |
| Average acceleration 15:00 - 15:59                                       | n_90042_0_0 |
| Average acceleration 18:00 - 18:59                                       | n_90045_0_0 |
| Average acceleration 22:00 - 22:59                                       | n_90049_0_0 |
| Wear duration overall                                                    | n_90051_0_0 |
| Non wear duration overall                                                | n_90052_0_0 |
| Wear duration during Monday                                              | n_90053_0_0 |
| Wear duration during Tuesday                                             | n_90054_0_0 |
| Wear duration during Wednesday                                           | n_90055_0_0 |
| Wear duration during Thursday                                            | n_90056_0_0 |
| Wear duration during Friday                                              | n_90057_0_0 |
| Wear duration during Saturday                                            | n_90058_0_0 |
| Wear duration during Sunday                                              | n_90059_0_0 |
| Wear duration during 00:00 - 00:59                                       | n_90060_0_0 |
| Wear duration during 02:00 - 02:59                                       | n_90062_0_0 |
| Wear duration during 03:00 - 03:59                                       | n_90063_0_0 |
| Wear duration during 04:00 - 04:59                                       | n_90064_0_0 |
| Wear duration during 05:00 - 05:59                                       | n_90065_0_0 |
| Wear duration during 06:00 - 06:59                                       | n_90066_0_0 |
| Wear duration during 08:00 - 08:59                                       | n_90068_0_0 |
| Wear duration during 09:00 - 09:59                                       | n_90069_0_0 |
| Wear duration during 11:00 - 11:59                                       | n_90071_0_0 |
| Wear duration during 12:00 - 12:59                                       | n_90072_0_0 |
| Wear duration during 13:00 - 13:59                                       | n_90073_0_0 |
| Wear duration during 14:00 - 14:59                                       | n_90074_0_0 |
| Wear duration during 15:00 - 15:59                                       | n_90075_0_0 |
| Wear duration during 16:00 - 16:59                                       | n_90076_0_0 |
| Wear duration during 17:00 - 17:59                                       | n_90077_0_0 |
| Wear duration during 18:00 - 18:59                                       | n_90078_0_0 |
| Wear duration during 19:00 - 19:59                                       | n_90079_0_0 |
| Wear duration during 21:00 - 21:59                                       | n_90081_0_0 |
| Wear duration during 22:00 - 22:59                                       | n_90082_0_0 |
| Wear duration during 23:00 - 23:59                                       | n_90083_0_0 |
| Unique hours of wear in a 24 hour cycle (scattered over multiple days)   | n_90084_0_0 |
| Unique minutes of wear in a 24 hour cycle (scattered over multiple days) | n_90085_0_0 |
| Non wear episodes over 1 hour duration                                   | n_90086_0_0 |
| No-wear time bias adjusted average acceleration                          | n_90087_0_0 |
| No-wear time bias adjusted acceleration standard deviation               | n_90088_0_0 |
| No-wear time bias adjusted acceleration median                           | n_90089_0_0 |
| No-wear time bias adjusted acceleration minimum                          | n_90090_0_0 |
| Fraction acceleration <= 1 milli-gravities                               | n_90092_0_0 |
| Fraction acceleration <= 2 milli-gravities                               | n_90093_0_0 |
| Fraction acceleration <= 5 milli-gravities                               | n_90096_0_0 |
| Fraction acceleration <= 10 milli-gravities                              | n_90101_0_0 |
| Fraction acceleration <= 11 milli-gravities                              | n_90102_0_0 |

|                                                                                  |              |
|----------------------------------------------------------------------------------|--------------|
| Fraction acceleration <= 12 milli-gravities                                      | n_90103_0_0  |
| Fraction acceleration <= 13 milli-gravities                                      | n_90104_0_0  |
| Fraction acceleration <= 14 milli-gravities                                      | n_90105_0_0  |
| Fraction acceleration <= 15 milli-gravities                                      | n_90106_0_0  |
| Fraction acceleration <= 16 milli-gravities                                      | n_90107_0_0  |
| Fraction acceleration <= 17 milli-gravities                                      | n_90108_0_0  |
| Fraction acceleration <= 18 milli-gravities                                      | n_90109_0_0  |
| Fraction acceleration <= 19 milli-gravities                                      | n_90110_0_0  |
| Fraction acceleration <= 20 milli-gravities                                      | n_90111_0_0  |
| Fraction acceleration <= 30 milli-gravities                                      | n_90113_0_0  |
| Fraction acceleration <= 50 milli-gravities                                      | n_90117_0_0  |
| Fraction acceleration <= 55 milli-gravities                                      | n_90118_0_0  |
| Fraction acceleration <= 60 milli-gravities                                      | n_90119_0_0  |
| Fraction acceleration <= 65 milli-gravities                                      | n_90120_0_0  |
| Fraction acceleration <= 70 milli-gravities                                      | n_90121_0_0  |
| Fraction acceleration <= 75 milli-gravities                                      | n_90122_0_0  |
| Fraction acceleration <= 80 milli-gravities                                      | n_90123_0_0  |
| Fraction acceleration <= 90 milli-gravities                                      | n_90125_0_0  |
| Fraction acceleration <= 95 milli-gravities                                      | n_90126_0_0  |
| Fraction acceleration <= 125 milli-gravities                                     | n_90128_0_0  |
| Fraction acceleration <= 150 milli-gravities                                     | n_90129_0_0  |
| Fraction acceleration <= 175 milli-gravities                                     | n_90130_0_0  |
| Fraction acceleration <= 200 milli-gravities                                     | n_90131_0_0  |
| Fraction acceleration <= 225 milli-gravities                                     | n_90132_0_0  |
| Fraction acceleration <= 250 milli-gravities                                     | n_90133_0_0  |
| Fraction acceleration <= 275 milli-gravities                                     | n_90134_0_0  |
| Fraction acceleration <= 300 milli-gravities                                     | n_90135_0_0  |
| Fraction acceleration <= 325 milli-gravities                                     | n_90136_0_0  |
| Fraction acceleration <= 350 milli-gravities                                     | n_90137_0_0  |
| Fraction acceleration <= 375 milli-gravities                                     | n_90138_0_0  |
| Fraction acceleration <= 400 milli-gravities                                     | n_90139_0_0  |
| Fraction acceleration <= 425 milli-gravities                                     | n_90140_0_0  |
| Fraction acceleration <= 450 milli-gravities                                     | n_90141_0_0  |
| Fraction acceleration <= 475 milli-gravities                                     | n_90142_0_0  |
| Fraction acceleration <= 500 milli-gravities                                     | n_90143_0_0  |
| Fraction acceleration <= 600 milli-gravities                                     | n_90144_0_0  |
| Fraction acceleration <= 700 milli-gravities                                     | n_90145_0_0  |
| Fraction acceleration <= 800 milli-gravities                                     | n_90146_0_0  |
| Fraction acceleration <= 900 milli-gravities                                     | n_90147_0_0  |
| Fraction acceleration <= 1000 milli-gravities                                    | n_90148_0_0  |
| Fraction acceleration <= 1100 milli-gravities                                    | n_90149_0_0  |
| Fraction acceleration <= 1200 milli-gravities                                    | n_90150_0_0  |
| Fraction acceleration <= 1400 milli-gravities                                    | n_90152_0_0  |
| Fraction acceleration <= 1600 milli-gravities                                    | n_90154_0_0  |
| Fraction acceleration <= 1700 milli-gravities                                    | n_90155_0_0  |
| Fraction acceleration <= 1800 milli-gravities                                    | n_90156_0_0  |
| Fraction acceleration <= 1900 milli-gravities                                    | n_90157_0_0  |
| Fraction acceleration <= 2000 milli-gravities                                    | n_90158_0_0  |
| Calibration coefficients - x offset                                              | n_90161_0_0  |
| Calibration coefficients - z offset                                              | n_90163_0_0  |
| Calibration coefficients - z slope                                               | n_90166_0_0  |
| Calibration coefficients - x temp                                                | n_90167_0_0  |
| Calibration coefficients - y temp                                                | n_90168_0_0  |
| Calibration coefficients - z temp                                                | n_90169_0_0  |
| Calibration - number of static points                                            | n_90171_0_0  |
| Calibration - minimum x stationary value                                         | n_90172_0_0  |
| Calibration - minimum y stationary value                                         | n_90174_0_0  |
| Calibration - maximum y stationary value                                         | n_90175_0_0  |
| Calibration - minimum z stationary value                                         | n_90176_0_0  |
| Calibration - maximum z stationary value                                         | n_90177_0_0  |
| Device ID                                                                        | n_90179_0_0  |
| Interrupted recording periods                                                    | n_90180_0_0  |
| Duration of interrupted recording periods                                        | n_90181_0_0  |
| Readings exceeding +/-8 gravities before calibration                             | n_90183_0_0  |
| Maximum readings exceeding +/-8 gravities before calibration in a 5 second epoch | n_90184_0_0  |
| Maximum readings exceeding +/-8 gravities after calibration in a 5 second epoch  | n_90186_0_0  |
| Sample rate average                                                              | n_90188_0_0  |
| Sample rate standard deviation                                                   | n_90189_0_0  |
| Sample rate minimum                                                              | n_90190_0_0  |
| Temperature standard deviation                                                   | n_90193_0_0  |
| Temperature minimum                                                              | n_90194_0_0  |
| Invitation to physical activity study, acceptance                                | n_110005_0_0 |
| When fluid intelligence test completed                                           | ts_20135_0_0 |
| When trail making test completed                                                 | ts_20136_0_0 |
| When symbol digit substitution test completed                                    | ts_20137_0_0 |
| White blood cell (leukocyte) count acquisition time                              | ts_30002_0_0 |
| Red blood cell (erythrocyte) count acquisition time                              | ts_30012_0_0 |

|                                                                                           |              |
|-------------------------------------------------------------------------------------------|--------------|
| Haemoglobin concentration acquisition time                                                | ts_30022_0_0 |
| Haematocrit acquisition time                                                              | ts_30032_0_0 |
| Mean corpuscular volume acquisition time                                                  | ts_30042_0_0 |
| Mean corpuscular haemoglobin acquisition time                                             | ts_30052_0_0 |
| Mean corpuscular haemoglobin concentration acquisition time                               | ts_30062_0_0 |
| Red blood cell (erythrocyte) distribution width acquisition time                          | ts_30072_0_0 |
| Platelet count acquisition time                                                           | ts_30082_0_0 |
| Platelet crit acquisition time                                                            | ts_30092_0_0 |
| Mean platelet (thrombocyte) volume acquisition time                                       | ts_30102_0_0 |
| Platelet distribution width acquisition time                                              | ts_30112_0_0 |
| Lymphocyte count acquisition time                                                         | ts_30122_0_0 |
| Monocyte count acquisition time                                                           | ts_30132_0_0 |
| Neutrophil count acquisition time                                                         | ts_30142_0_0 |
| Eosinophil count acquisition time                                                         | ts_30152_0_0 |
| Basophil count acquisition time                                                           | ts_30162_0_0 |
| Nucleated red blood cell count acquisition time                                           | ts_30172_0_0 |
| Lymphocyte percentage acquisition time                                                    | ts_30182_0_0 |
| Monocyte percentage acquisition time                                                      | ts_30192_0_0 |
| Neutrophil percentage acquisition time                                                    | ts_30202_0_0 |
| Eosinophil percentage acquisition time                                                    | ts_30212_0_0 |
| Basophil percentage acquisition time                                                      | ts_30222_0_0 |
| Nucleated red blood cell percentage acquisition time                                      | ts_30232_0_0 |
| Reticulocyte count acquisition time                                                       | ts_30252_0_0 |
| Mean reticulocyte volume acquisition time                                                 | ts_30262_0_0 |
| Mean spheroid cell volume acquisition time                                                | ts_30272_0_0 |
| Immature reticulocyte fraction acquisition time                                           | ts_30282_0_0 |
| High light scatter reticulocyte percentage acquisition time                               | ts_30292_0_0 |
| High light scatter reticulocyte count acquisition time                                    | ts_30302_0_0 |
| Start time of wear                                                                        | ts_90010_0_0 |
| End time of wear                                                                          | ts_90011_0_0 |
| Typhoid and paratyphoid fevers (ICD-10: A01)                                              | groupA01     |
| Other salmonella infections (ICD-10: A02)                                                 | groupA02     |
| Shigellosis (ICD-10: A03)                                                                 | groupA03     |
| Other bacterial intestinal infections (ICD-10: A04)                                       | groupA04     |
| Other bacterial foodborne intoxications, not elsewhere classified (ICD-10: A05)           | groupA05     |
| Amoebiasis (ICD-10: A06)                                                                  | groupA06     |
| Other protozoal intestinal diseases (ICD-10: A07)                                         | groupA07     |
| Viral and other specified intestinal infections (ICD-10: A08)                             | groupA08     |
| Other gastroenteritis and colitis of infectious and unspecified origin (ICD-10: A09)      | groupA09     |
| Respiratory tuberculosis, bacteriologically and histologically confirmed (ICD-10: A15)    | groupA15     |
| Respiratory tuberculosis, not confirmed bacteriologically or histologically (ICD-10: A16) | groupA16     |
| Tuberculosis of nervous system (ICD-10: A17)                                              | groupA17     |
| Tuberculosis of other organs (ICD-10: A18)                                                | groupA18     |
| Miliary tuberculosis (ICD-10: A19)                                                        | groupA19     |
| Plague (ICD-10: A20)                                                                      | groupA20     |
| Anthrax (ICD-10: A22)                                                                     | groupA22     |
| Erysipeloid (ICD-10: A26)                                                                 | groupA26     |
| Leptospirosis (ICD-10: A27)                                                               | groupA27     |
| Other zoonotic bacterial diseases, not elsewhere classified (ICD-10: A28)                 | groupA28     |
| Infection due to other mycobacteria (ICD-10: A31)                                         | groupA31     |
| Listeriosis (ICD-10: A32)                                                                 | groupA32     |
| Diphtheria (ICD-10: A36)                                                                  | groupA36     |
| Whooping cough (ICD-10: A37)                                                              | groupA37     |
| Scarlet fever (ICD-10: A38)                                                               | groupA38     |
| Meningococcal infection (ICD-10: A39)                                                     | groupA39     |
| Streptococcal sepsis (ICD-10: A40)                                                        | groupA40     |
| Other sepsis (ICD-10: A41)                                                                | groupA41     |
| Actinomycosis (ICD-10: A42)                                                               | groupA42     |
| Bartonellosis (ICD-10: A44)                                                               | groupA44     |
| Erysipelas (ICD-10: A46)                                                                  | groupA46     |
| Other bacterial diseases, not elsewhere classified (ICD-10: A48)                          | groupA48     |
| Bacterial infection of unspecified site (ICD-10: A49)                                     | groupA49     |
| Early syphilis (ICD-10: A51)                                                              | groupA51     |
| Late syphilis (ICD-10: A52)                                                               | groupA52     |
| Other and unspecified syphilis (ICD-10: A53)                                              | groupA53     |
| Gonococcal infection (ICD-10: A54)                                                        | groupA54     |
| Other sexually transmitted chlamydial diseases (ICD-10: A56)                              | groupA56     |
| Anogenital herpesviral [herpes simplex] infection (ICD-10: A60)                           | groupA60     |
| Unspecified sexually transmitted disease (ICD-10: A64)                                    | groupA64     |
| Yaws (ICD-10: A66)                                                                        | groupA66     |
| Pinta [carate] (ICD-10: A67)                                                              | groupA67     |
| Other spirochaetal infections (ICD-10: A69)                                               | groupA69     |
| Chlamydia psittaci infection (ICD-10: A70)                                                | groupA70     |
| Trachoma (ICD-10: A71)                                                                    | groupA71     |
| Other diseases caused by chlamydiae (ICD-10: A74)                                         | groupA74     |
| Typhus fever (ICD-10: A75)                                                                | groupA75     |
| Spotted fever [tick-borne rickettsioses] (ICD-10: A77)                                    | groupA77     |

|                                                                                                                  |          |
|------------------------------------------------------------------------------------------------------------------|----------|
| Q fever (ICD-10: A78)                                                                                            | groupA78 |
| Acute poliomyelitis (ICD-10: A80)                                                                                | groupA80 |
| Atypical virus infections of central nervous system (ICD-10: A81)                                                | groupA81 |
| Other viral encephalitis, not elsewhere classified (ICD-10: A85)                                                 | groupA85 |
| Unspecified viral encephalitis (ICD-10: A86)                                                                     | groupA86 |
| Viral meningitis (ICD-10: A87)                                                                                   | groupA87 |
| Unspecified viral infection of central nervous system (ICD-10: A89)                                              | groupA89 |
| Dengue fever [classical dengue] (ICD-10: A90)                                                                    | groupA90 |
| Other mosquito-borne viral fevers (ICD-10: A92)                                                                  | groupA92 |
| Other arthropod-borne viral fevers, not elsewhere classified (ICD-10: A93)                                       | groupA93 |
| Unspecified arthropod-borne viral fever (ICD-10: A94)                                                            | groupA94 |
| Herpesviral [herpes simplex] infections (ICD-10: B00)                                                            | groupB00 |
| Varicella [chickenpox] (ICD-10: B01)                                                                             | groupB01 |
| Zoster [herpes zoster] (ICD-10: B02)                                                                             | groupB02 |
| Rubella [German measles] (ICD-10: B06)                                                                           | groupB06 |
| Viral warts (ICD-10: B07)                                                                                        | groupB07 |
| Other viral infections characterized by skin and mucous membrane lesions, not elsewhere classified (ICD-10: B08) | groupB08 |
| Unspecified viral infection characterized by skin and mucous membrane lesions (ICD-10: B09)                      | groupB09 |
| Acute hepatitis A (ICD-10: B15)                                                                                  | groupB15 |
| Acute hepatitis B (ICD-10: B16)                                                                                  | groupB16 |
| Other acute viral hepatitis (ICD-10: B17)                                                                        | groupB17 |
| Chronic viral hepatitis (ICD-10: B18)                                                                            | groupB18 |
| Unspecified viral hepatitis (ICD-10: B19)                                                                        | groupB19 |
| Human immunodeficiency virus [HIV] disease resulting in infectious and parasitic diseases (ICD-10: B20)          | groupB20 |
| Human immunodeficiency virus [HIV] disease resulting in malignant neoplasms (ICD-10: B21)                        | groupB21 |
| Human immunodeficiency virus [HIV] disease resulting in other specified diseases (ICD-10: B22)                   | groupB22 |
| Human immunodeficiency virus [HIV] disease resulting in other conditions (ICD-10: B23)                           | groupB23 |
| Unspecified human immunodeficiency virus [HIV] disease (ICD-10: B24)                                             | groupB24 |
| Cytomegaloviral disease (ICD-10: B25)                                                                            | groupB25 |
| Mumps (ICD-10: B26)                                                                                              | groupB26 |
| Infectious mononucleosis (ICD-10: B27)                                                                           | groupB27 |
| Viral conjunctivitis (ICD-10: B30)                                                                               | groupB30 |
| Other viral diseases, not elsewhere classified (ICD-10: B33)                                                     | groupB33 |
| Viral infection of unspecified site (ICD-10: B34)                                                                | groupB34 |
| Other superficial mycoses (ICD-10: B36)                                                                          | groupB36 |
| Candidiasis (ICD-10: B37)                                                                                        | groupB37 |
| Histoplasmosis (ICD-10: B39)                                                                                     | groupB39 |
| Blastomycosis (ICD-10: B40)                                                                                      | groupB40 |
| Chromomycosis and phaeomycotic abscess (ICD-10: B43)                                                             | groupB43 |
| Aspergillosis (ICD-10: B44)                                                                                      | groupB44 |
| Cryptococcosis (ICD-10: B45)                                                                                     | groupB45 |
| Mycetoma (ICD-10: B47)                                                                                           | groupB47 |
| Other mycoses, not elsewhere classified (ICD-10: B48)                                                            | groupB48 |
| Unspecified mycosis (ICD-10: B49)                                                                                | groupB49 |
| Plasmodium falciparum malaria (ICD-10: B50)                                                                      | groupB50 |
| Plasmodium vivax malaria (ICD-10: B51)                                                                           | groupB51 |
| Plasmodium malariae malaria (ICD-10: B52)                                                                        | groupB52 |
| Other parasitologically confirmed malaria (ICD-10: B53)                                                          | groupB53 |
| Unspecified malaria (ICD-10: B54)                                                                                | groupB54 |
| Leishmaniasis (ICD-10: B55)                                                                                      | groupB55 |
| Chagas disease (ICD-10: B57)                                                                                     | groupB57 |
| Toxoplasmosis (ICD-10: B58)                                                                                      | groupB58 |
| Pneumocystosis (ICD-10: B59)                                                                                     | groupB59 |
| Other protozoal diseases, not elsewhere classified (ICD-10: B60)                                                 | groupB60 |
| Schistosomiasis [bilharziasis] (ICD-10: B65)                                                                     | groupB65 |
| Other fluke infections (ICD-10: B66)                                                                             | groupB66 |
| Echinococcosis (ICD-10: B67)                                                                                     | groupB67 |
| Hookworm diseases (ICD-10: B76)                                                                                  | groupB76 |
| Strongyloidiasis (ICD-10: B78)                                                                                   | groupB78 |
| Enterobiasis (ICD-10: B80)                                                                                       | groupB80 |
| Other intestinal helminthiasis, not elsewhere classified (ICD-10: B81)                                           | groupB81 |
| Unspecified intestinal parasitism (ICD-10: B82)                                                                  | groupB82 |
| Other helminthiasis (ICD-10: B83)                                                                                | groupB83 |
| Pediculosis and phthiriasis (ICD-10: B85)                                                                        | groupB85 |
| Scabies (ICD-10: B86)                                                                                            | groupB86 |
| Myiasis (ICD-10: B87)                                                                                            | groupB87 |
| Other infestations (ICD-10: B88)                                                                                 | groupB88 |
| Sequelae of tuberculosis (ICD-10: B90)                                                                           | groupB90 |
| Sequelae of poliomyelitis (ICD-10: B91)                                                                          | groupB91 |
| Sequelae of other and unspecified infectious and parasitic diseases (ICD-10: B94)                                | groupB94 |
| Streptococcus and staphylococcus as the cause of diseases classified to other chapters (ICD-10: B95)             | groupB95 |
| Other specified bacterial agents as the cause of diseases classified to other chapters (ICD-10: B96)             | groupB96 |
| Viral agents as the cause of diseases classified to other chapters (ICD-10: B97)                                 | groupB97 |
| Other specified infectious agents as the cause of diseases classified to other chapters (ICD-10: B98)            | groupB98 |
| Other and unspecified infectious diseases (ICD-10: B99)                                                          | groupB99 |
| Malignant neoplasm of lip (ICD-10: C00)                                                                          | groupC00 |
| Malignant neoplasm of base of tongue (ICD-10: C01)                                                               | groupC01 |

|                                                                                                                    |          |
|--------------------------------------------------------------------------------------------------------------------|----------|
| Malignant neoplasm of other and unspecified parts of tongue (ICD-10: C02)                                          | groupC02 |
| Malignant neoplasm of gum (ICD-10: C03)                                                                            | groupC03 |
| Malignant neoplasm of floor of mouth (ICD-10: C04)                                                                 | groupC04 |
| Malignant neoplasm of palate (ICD-10: C05)                                                                         | groupC05 |
| Malignant neoplasm of other and unspecified parts of mouth (ICD-10: C06)                                           | groupC06 |
| Malignant neoplasm of parotid gland (ICD-10: C07)                                                                  | groupC07 |
| Malignant neoplasm of other and unspecified major salivary glands (ICD-10: C08)                                    | groupC08 |
| Malignant neoplasm of tonsil (ICD-10: C09)                                                                         | groupC09 |
| Malignant neoplasm of oropharynx (ICD-10: C10)                                                                     | groupC10 |
| Malignant neoplasm of nasopharynx (ICD-10: C11)                                                                    | groupC11 |
| Malignant neoplasm of piriform sinus (ICD-10: C12)                                                                 | groupC12 |
| Malignant neoplasm of hypopharynx (ICD-10: C13)                                                                    | groupC13 |
| Malignant neoplasm of other and ill-defined sites in the lip, oral cavity and pharynx (ICD-10: C14)                | groupC14 |
| Malignant neoplasm of oesophagus (ICD-10: C15)                                                                     | groupC15 |
| Malignant neoplasm of stomach (ICD-10: C16)                                                                        | groupC16 |
| Malignant neoplasm of small intestine (ICD-10: C17)                                                                | groupC17 |
| Malignant neoplasm of colon (ICD-10: C18)                                                                          | groupC18 |
| Malignant neoplasm of rectosigmoid junction (ICD-10: C19)                                                          | groupC19 |
| Malignant neoplasm of rectum (ICD-10: C20)                                                                         | groupC20 |
| Malignant neoplasm of anus and anal canal (ICD-10: C21)                                                            | groupC21 |
| Malignant neoplasm of gallbladder (ICD-10: C23)                                                                    | groupC23 |
| Malignant neoplasm of other and unspecified parts of biliary tract (ICD-10: C24)                                   | groupC24 |
| Malignant neoplasm of pancreas (ICD-10: C25)                                                                       | groupC25 |
| Malignant neoplasm of other and ill-defined digestive organs (ICD-10: C26)                                         | groupC26 |
| Malignant neoplasm of nasal cavity and middle ear (ICD-10: C30)                                                    | groupC30 |
| Malignant neoplasm of accessory sinuses (ICD-10: C31)                                                              | groupC31 |
| Malignant neoplasm of larynx (ICD-10: C32)                                                                         | groupC32 |
| Malignant neoplasm of trachea (ICD-10: C33)                                                                        | groupC33 |
| Malignant neoplasm of bronchus and lung (ICD-10: C34)                                                              | groupC34 |
| Malignant neoplasm of thymus (ICD-10: C37)                                                                         | groupC37 |
| Malignant neoplasm of heart, mediastinum and pleura (ICD-10: C38)                                                  | groupC38 |
| Malignant neoplasm of other and ill-defined sites in the respiratory system and intrathoracic organs (ICD-10: C39) | groupC39 |
| Malignant neoplasm of bone and articular cartilage of limbs (ICD-10: C40)                                          | groupC40 |
| Malignant neoplasm of bone and articular cartilage of other and unspecified sites (ICD-10: C41)                    | groupC41 |
| Malignant melanoma of skin (ICD-10: C43)                                                                           | groupC43 |
| Other malignant neoplasms of skin (ICD-10: C44)                                                                    | groupC44 |
| Mesothelioma (ICD-10: C45)                                                                                         | groupC45 |
| Kaposi sarcoma (ICD-10: C46)                                                                                       | groupC46 |
| Malignant neoplasm of peripheral nerves and autonomic nervous system (ICD-10: C47)                                 | groupC47 |
| Malignant neoplasm of retroperitoneum and peritoneum (ICD-10: C48)                                                 | groupC48 |
| Malignant neoplasm of other connective and soft tissue (ICD-10: C49)                                               | groupC49 |
| Malignant neoplasm of breast (ICD-10: C50)                                                                         | groupC50 |
| Malignant neoplasm of vulva (ICD-10: C51)                                                                          | groupC51 |
| Malignant neoplasm of vagina (ICD-10: C52)                                                                         | groupC52 |
| Malignant neoplasm of cervix uteri (ICD-10: C53)                                                                   | groupC53 |
| Malignant neoplasm of corpus uteri (ICD-10: C54)                                                                   | groupC54 |
| Malignant neoplasm of uterus, part unspecified (ICD-10: C55)                                                       | groupC55 |
| Malignant neoplasm of ovary (ICD-10: C56)                                                                          | groupC56 |
| Malignant neoplasm of other and unspecified female genital organs (ICD-10: C57)                                    | groupC57 |
| Malignant neoplasm of placenta (ICD-10: C58)                                                                       | groupC58 |
| Malignant neoplasm of penis (ICD-10: C60)                                                                          | groupC60 |
| Malignant neoplasm of prostate (ICD-10: C61)                                                                       | groupC61 |
| Malignant neoplasm of testis (ICD-10: C62)                                                                         | groupC62 |
| Malignant neoplasm of other and unspecified male genital organs (ICD-10: C63)                                      | groupC63 |
| Malignant neoplasm of kidney, except renal pelvis (ICD-10: C64)                                                    | groupC64 |
| Malignant neoplasm of renal pelvis (ICD-10: C65)                                                                   | groupC65 |
| Malignant neoplasm of ureter (ICD-10: C66)                                                                         | groupC66 |
| Malignant neoplasm of bladder (ICD-10: C67)                                                                        | groupC67 |
| Malignant neoplasm of other and unspecified urinary organs (ICD-10: C68)                                           | groupC68 |
| Malignant neoplasm of eye and adnexa (ICD-10: C69)                                                                 | groupC69 |
| Malignant neoplasm of meninges (ICD-10: C70)                                                                       | groupC70 |
| Malignant neoplasm of brain (ICD-10: C71)                                                                          | groupC71 |
| Malignant neoplasm of spinal cord, cranial nerves and other parts of central nervous system (ICD-10: C72)          | groupC72 |
| Malignant neoplasm of thyroid gland (ICD-10: C73)                                                                  | groupC73 |
| Malignant neoplasm of adrenal gland (ICD-10: C74)                                                                  | groupC74 |
| Malignant neoplasm of other endocrine glands and related structures (ICD-10: C75)                                  | groupC75 |
| Malignant neoplasm of other and ill-defined sites (ICD-10: C76)                                                    | groupC76 |
| Secondary and unspecified malignant neoplasm of lymph nodes (ICD-10: C77)                                          | groupC77 |
| Secondary malignant neoplasm of respiratory and digestive organs (ICD-10: C78)                                     | groupC78 |
| Secondary malignant neoplasm of other and unspecified sites (ICD-10: C79)                                          | groupC79 |
| Malignant neoplasm, without specification of site (ICD-10: C80)                                                    | groupC80 |
| Hodgkin lymphoma (ICD-10: C81)                                                                                     | groupC81 |
| Follicular lymphoma (ICD-10: C82)                                                                                  | groupC82 |
| Mature T/NK-cell lymphomas (ICD-10: C84)                                                                           | groupC84 |
| Other and unspecified types of non-Hodgkin lymphoma (ICD-10: C85)                                                  | groupC85 |
| Other specified types of T/NK-cell lymphoma (ICD-10: C86)                                                          | groupC86 |
| Malignant immunoproliferative diseases (ICD-10: C88)                                                               | groupC88 |

|                                                                                                                 |          |
|-----------------------------------------------------------------------------------------------------------------|----------|
| Multiple myeloma and malignant plasma cell neoplasms (ICD-10: C90)                                              | groupC90 |
| Lymphoid leukaemia (ICD-10: C91)                                                                                | groupC91 |
| Myeloid leukaemia (ICD-10: C92)                                                                                 | groupC92 |
| Monocytic leukaemia (ICD-10: C93)                                                                               | groupC93 |
| Other leukaemias of specified cell type (ICD-10: C94)                                                           | groupC94 |
| Leukaemia of unspecified cell type (ICD-10: C95)                                                                | groupC95 |
| Other and unspecified malignant neoplasms of lymphoid, haematopoietic and related tissue (ICD-10: C96)          | groupC96 |
| Malignant neoplasms of independent (primary) multiple sites (ICD-10: C97)                                       | groupC97 |
| Carcinoma in situ of oral cavity, oesophagus and stomach (ICD-10: D00)                                          | groupD00 |
| Carcinoma in situ of other and unspecified digestive organs (ICD-10: D01)                                       | groupD01 |
| Carcinoma in situ of middle ear and respiratory system (ICD-10: D02)                                            | groupD02 |
| Melanoma in situ (ICD-10: D03)                                                                                  | groupD03 |
| Carcinoma in situ of skin (ICD-10: D04)                                                                         | groupD04 |
| Carcinoma in situ of breast (ICD-10: D05)                                                                       | groupD05 |
| Carcinoma in situ of cervix uteri (ICD-10: D06)                                                                 | groupD06 |
| Carcinoma in situ of other and unspecified genital organs (ICD-10: D07)                                         | groupD07 |
| Carcinoma in situ of other and unspecified sites (ICD-10: D09)                                                  | groupD09 |
| Benign neoplasm of mouth and pharynx (ICD-10: D10)                                                              | groupD10 |
| Benign neoplasm of major salivary glands (ICD-10: D11)                                                          | groupD11 |
| Benign neoplasm of colon, rectum, anus and anal canal (ICD-10: D12)                                             | groupD12 |
| Benign neoplasm of other and ill-defined parts of digestive system (ICD-10: D13)                                | groupD13 |
| Benign neoplasm of middle ear and respiratory system (ICD-10: D14)                                              | groupD14 |
| Benign neoplasm of other and unspecified intrathoracic organs (ICD-10: D15)                                     | groupD15 |
| Benign neoplasm of bone and articular cartilage (ICD-10: D16)                                                   | groupD16 |
| Haemangioma and lymphangioma, any site (ICD-10: D18)                                                            | groupD18 |
| Benign neoplasm of mesothelial tissue (ICD-10: D19)                                                             | groupD19 |
| Benign neoplasm of soft tissue of retroperitoneum and peritoneum (ICD-10: D20)                                  | groupD20 |
| Other benign neoplasms of connective and other soft tissue (ICD-10: D21)                                        | groupD21 |
| Melanocytic naevi (ICD-10: D22)                                                                                 | groupD22 |
| Other benign neoplasms of skin (ICD-10: D23)                                                                    | groupD23 |
| Leiomyoma of uterus (ICD-10: D25)                                                                               | groupD25 |
| Other benign neoplasms of uterus (ICD-10: D26)                                                                  | groupD26 |
| Benign neoplasm of ovary (ICD-10: D27)                                                                          | groupD27 |
| Benign neoplasm of other and unspecified female genital organs (ICD-10: D28)                                    | groupD28 |
| Benign neoplasm of male genital organs (ICD-10: D29)                                                            | groupD29 |
| Benign neoplasm of urinary organs (ICD-10: D30)                                                                 | groupD30 |
| Benign neoplasm of meninges (ICD-10: D32)                                                                       | groupD32 |
| Benign neoplasm of brain and other parts of central nervous system (ICD-10: D33)                                | groupD33 |
| Benign neoplasm of thyroid gland (ICD-10: D34)                                                                  | groupD34 |
| Benign neoplasm of other and unspecified endocrine glands (ICD-10: D35)                                         | groupD35 |
| Benign neoplasm of other and unspecified sites (ICD-10: D36)                                                    | groupD36 |
| Neoplasm of uncertain or unknown behaviour of oral cavity and digestive organs (ICD-10: D37)                    | groupD37 |
| Neoplasm of uncertain or unknown behaviour of middle ear and respiratory and intrathoracic organs (ICD-10: D38) | groupD38 |
| Neoplasm of uncertain or unknown behaviour of female genital organs (ICD-10: D39)                               | groupD39 |
| Neoplasm of uncertain or unknown behaviour of male genital organs (ICD-10: D40)                                 | groupD40 |
| Neoplasm of uncertain or unknown behaviour of urinary organs (ICD-10: D41)                                      | groupD41 |
| Neoplasm of uncertain or unknown behaviour of meninges (ICD-10: D42)                                            | groupD42 |
| Neoplasm of uncertain or unknown behaviour of brain and central nervous system (ICD-10: D43)                    | groupD43 |
| Neoplasm of uncertain or unknown behaviour of endocrine glands (ICD-10: D44)                                    | groupD44 |
| Polycythaemia vera (ICD-10: D45)                                                                                | groupD45 |
| Myelodysplastic syndromes (ICD-10: D46)                                                                         | groupD46 |
| Other neoplasms of uncertain or unknown behaviour of lymphoid, haematopoietic and related tissue (ICD-10: D47)  | groupD47 |
| Neoplasm of uncertain or unknown behaviour of other and unspecified sites (ICD-10: D48)                         | groupD48 |
| Iron deficiency anaemia (ICD-10: D50)                                                                           | groupD50 |
| Vitamin B12 deficiency anaemia (ICD-10: D51)                                                                    | groupD51 |
| Folate deficiency anaemia (ICD-10: D52)                                                                         | groupD52 |
| Other nutritional anaemias (ICD-10: D53)                                                                        | groupD53 |
| Anaemia due to enzyme disorders (ICD-10: D55)                                                                   | groupD55 |
| Thalassaemia (ICD-10: D56)                                                                                      | groupD56 |
| Sickle-cell disorders (ICD-10: D57)                                                                             | groupD57 |
| Other hereditary haemolytic anaemias (ICD-10: D58)                                                              | groupD58 |
| Acquired haemolytic anaemia (ICD-10: D59)                                                                       | groupD59 |
| Acquired pure red cell aplasia [erythroblastopenia] (ICD-10: D60)                                               | groupD60 |
| Other aplastic anaemias (ICD-10: D61)                                                                           | groupD61 |
| Acute posthaemorrhagic anaemia (ICD-10: D62)                                                                    | groupD62 |
| Anaemia in chronic diseases classified elsewhere (ICD-10: D63)                                                  | groupD63 |
| Other anaemias (ICD-10: D64)                                                                                    | groupD64 |
| Disseminated intravascular coagulation [defibrination syndrome] (ICD-10: D65)                                   | groupD65 |
| Hereditary factor VIII deficiency (ICD-10: D66)                                                                 | groupD66 |
| Hereditary factor IX deficiency (ICD-10: D67)                                                                   | groupD67 |
| Other coagulation defects (ICD-10: D68)                                                                         | groupD68 |
| Purpura and other haemorrhagic conditions (ICD-10: D69)                                                         | groupD69 |
| Functional disorders of polymorphonuclear neutrophils (ICD-10: D71)                                             | groupD71 |
| Other disorders of white blood cells (ICD-10: D72)                                                              | groupD72 |
| Diseases of spleen (ICD-10: D73)                                                                                | groupD73 |
| Methaemoglobinaemia (ICD-10: D74)                                                                               | groupD74 |
| Other diseases of blood and blood-forming organs (ICD-10: D75)                                                  | groupD75 |



|                                                                                                             |          |
|-------------------------------------------------------------------------------------------------------------|----------|
| Other specified diseases with participation of lymphoreticular and reticulohistiocytic tissue (ICD-10: D76) | groupD76 |
| Other disorders of blood and blood-forming organs in diseases classified elsewhere (ICD-10: D77)            | groupD77 |
| Immunodeficiency with predominantly antibody defects (ICD-10: D80)                                          | groupD80 |
| Combined immunodeficiencies (ICD-10: D81)                                                                   | groupD81 |
| Immunodeficiency associated with other major defects (ICD-10: D82)                                          | groupD82 |
| Common variable immunodeficiency (ICD-10: D83)                                                              | groupD83 |
| Other immunodeficiencies (ICD-10: D84)                                                                      | groupD84 |
| Sarcoidosis (ICD-10: D86)                                                                                   | groupD86 |
| Other disorders involving the immune mechanism, not elsewhere classified (ICD-10: D89)                      | groupD89 |
| Iodine-deficiency-related thyroid disorders and allied conditions (ICD-10: E01)                             | groupE01 |
| Subclinical iodine-deficiency hypothyroidism (ICD-10: E02)                                                  | groupE02 |
| Other nontoxic goitre (ICD-10: E04)                                                                         | groupE04 |
| Thyrotoxicosis [hyperthyroidism] (ICD-10: E05)                                                              | groupE05 |
| Other disorders of thyroid (ICD-10: E07)                                                                    | groupE07 |
| Insulin-dependent diabetes mellitus (ICD-10: E10)                                                           | groupE10 |
| Non-insulin-dependent diabetes mellitus (ICD-10: E11)                                                       | groupE11 |
| Malnutrition-related diabetes mellitus (ICD-10: E12)                                                        | groupE12 |
| Other specified diabetes mellitus (ICD-10: E13)                                                             | groupE13 |
| Unspecified diabetes mellitus (ICD-10: E14)                                                                 | groupE14 |
| Nondiabetic hypoglycaemic coma (ICD-10: E15)                                                                | groupE15 |
| Other disorders of pancreatic internal secretion (ICD-10: E16)                                              | groupE16 |
| Hypoparathyroidism (ICD-10: E20)                                                                            | groupE20 |
| Hyperparathyroidism and other disorders of parathyroid gland (ICD-10: E21)                                  | groupE21 |
| Hyperfunction of pituitary gland (ICD-10: E22)                                                              | groupE22 |
| Hypofunction and other disorders of pituitary gland (ICD-10: E23)                                           | groupE23 |
| Cushing syndrome (ICD-10: E24)                                                                              | groupE24 |
| Adrenogenital disorders (ICD-10: E25)                                                                       | groupE25 |
| Hyperaldosteronism (ICD-10: E26)                                                                            | groupE26 |
| Other disorders of adrenal gland (ICD-10: E27)                                                              | groupE27 |
| Ovarian dysfunction (ICD-10: E28)                                                                           | groupE28 |
| Testicular dysfunction (ICD-10: E29)                                                                        | groupE29 |
| Disorders of puberty, not elsewhere classified (ICD-10: E30)                                                | groupE30 |
| Polyglandular dysfunction (ICD-10: E31)                                                                     | groupE31 |
| Diseases of thymus (ICD-10: E32)                                                                            | groupE32 |
| Other endocrine disorders (ICD-10: E34)                                                                     | groupE34 |
| Disorders of endocrine glands in diseases classified elsewhere (ICD-10: E35)                                | groupE35 |
| Nutritional marasmus (ICD-10: E41)                                                                          | groupE41 |
| Unspecified severe protein-energy malnutrition (ICD-10: E43)                                                | groupE43 |
| Protein-energy malnutrition of moderate and mild degree (ICD-10: E44)                                       | groupE44 |
| Unspecified protein-energy malnutrition (ICD-10: E46)                                                       | groupE46 |
| Vitamin A deficiency (ICD-10: E50)                                                                          | groupE50 |
| Thiamine deficiency (ICD-10: E51)                                                                           | groupE51 |
| Niacin deficiency [pellagra] (ICD-10: E52)                                                                  | groupE52 |
| Deficiency of other B group vitamins (ICD-10: E53)                                                          | groupE53 |
| Ascorbic acid deficiency (ICD-10: E54)                                                                      | groupE54 |
| Vitamin D deficiency (ICD-10: E55)                                                                          | groupE55 |
| Other vitamin deficiencies (ICD-10: E56)                                                                    | groupE56 |
| Dietary calcium deficiency (ICD-10: E58)                                                                    | groupE58 |
| Dietary selenium deficiency (ICD-10: E59)                                                                   | groupE59 |
| Other nutritional deficiencies (ICD-10: E63)                                                                | groupE63 |
| Sequelae of malnutrition and other nutritional deficiencies (ICD-10: E64)                                   | groupE64 |
| Localized adiposity (ICD-10: E65)                                                                           | groupE65 |
| Other hyperalimentation (ICD-10: E67)                                                                       | groupE67 |
| Disorders of aromatic amino-acid metabolism (ICD-10: E70)                                                   | groupE70 |
| Disorders of branched-chain amino-acid metabolism and fatty-acid metabolism (ICD-10: E71)                   | groupE71 |
| Other disorders of amino-acid metabolism (ICD-10: E72)                                                      | groupE72 |
| Lactose intolerance (ICD-10: E73)                                                                           | groupE73 |
| Disorders of sphingolipid metabolism and other lipid storage disorders (ICD-10: E75)                        | groupE75 |
| Disorders of glycosaminoglycan metabolism (ICD-10: E76)                                                     | groupE76 |
| Disorders of glycoprotein metabolism (ICD-10: E77)                                                          | groupE77 |
| Disorders of lipoprotein metabolism and other lipidaemias (ICD-10: E78)                                     | groupE78 |
| Disorders of purine and pyrimidine metabolism (ICD-10: E79)                                                 | groupE79 |
| Disorders of porphyrin and bilirubin metabolism (ICD-10: E80)                                               | groupE80 |
| Disorders of mineral metabolism (ICD-10: E83)                                                               | groupE83 |
| Cystic fibrosis (ICD-10: E84)                                                                               | groupE84 |
| Amyloidosis (ICD-10: E85)                                                                                   | groupE85 |
| Volume depletion (ICD-10: E86)                                                                              | groupE86 |
| Other disorders of fluid, electrolyte and acid-base balance (ICD-10: E87)                                   | groupE87 |
| Other metabolic disorders (ICD-10: E88)                                                                     | groupE88 |
| Postprocedural endocrine and metabolic disorders, not elsewhere classified (ICD-10: E89)                    | groupE89 |
| Dementia in Alzheimer disease (ICD-10: F00)                                                                 | groupF00 |
| Vascular dementia (ICD-10: F01)                                                                             | groupF01 |
| Dementia in other diseases classified elsewhere (ICD-10: F02)                                               | groupF02 |
| Unspecified dementia (ICD-10: F03)                                                                          | groupF03 |
| Organic amnesic syndrome, not induced by alcohol and other psychoactive substances (ICD-10: F04)            | groupF04 |
| Delirium, not induced by alcohol and other psychoactive substances (ICD-10: F05)                            | groupF05 |
| Other mental disorders due to brain damage and dysfunction and to physical disease (ICD-10: F06)            | groupF06 |

|                                                                                                                   |          |
|-------------------------------------------------------------------------------------------------------------------|----------|
| Personality and behavioural disorders due to brain disease, damage and dysfunction (ICD-10: F07)                  | groupF07 |
| Unspecified organic or symptomatic mental disorder (ICD-10: F09)                                                  | groupF09 |
| Mental and behavioural disorders due to use of alcohol (ICD-10: F10)                                              | groupF10 |
| Mental and behavioural disorders due to use of opioids (ICD-10: F11)                                              | groupF11 |
| Mental and behavioural disorders due to use of cannabinoids (ICD-10: F12)                                         | groupF12 |
| Mental and behavioural disorders due to use of sedatives or hypnotics (ICD-10: F13)                               | groupF13 |
| Mental and behavioural disorders due to use of cocaine (ICD-10: F14)                                              | groupF14 |
| Mental and behavioural disorders due to use of other stimulants, including caffeine (ICD-10: F15)                 | groupF15 |
| Mental and behavioural disorders due to use of hallucinogens (ICD-10: F16)                                        | groupF16 |
| Mental and behavioural disorders due to use of tobacco (ICD-10: F17)                                              | groupF17 |
| Mental and behavioural disorders due to use of volatile solvents (ICD-10: F18)                                    | groupF18 |
| Mental and behavioural disorders due to multiple drug use and use of other psychoactive substances (ICD-10: F19)  | groupF19 |
| Schizophrenia (ICD-10: F20)                                                                                       | groupF20 |
| Schizotypal disorder (ICD-10: F21)                                                                                | groupF21 |
| Persistent delusional disorders (ICD-10: F22)                                                                     | groupF22 |
| Acute and transient psychotic disorders (ICD-10: F23)                                                             | groupF23 |
| Induced delusional disorder (ICD-10: F24)                                                                         | groupF24 |
| Schizoaffective disorders (ICD-10: F25)                                                                           | groupF25 |
| Other nonorganic psychotic disorders (ICD-10: F28)                                                                | groupF28 |
| Unspecified nonorganic psychosis (ICD-10: F29)                                                                    | groupF29 |
| Manic episode (ICD-10: F30)                                                                                       | groupF30 |
| Bipolar affective disorder (ICD-10: F31)                                                                          | groupF31 |
| Depressive episode (ICD-10: F32)                                                                                  | groupF32 |
| Recurrent depressive disorder (ICD-10: F33)                                                                       | groupF33 |
| Persistent mood [affective] disorders (ICD-10: F34)                                                               | groupF34 |
| Other mood [affective] disorders (ICD-10: F38)                                                                    | groupF38 |
| Unspecified mood [affective] disorder (ICD-10: F39)                                                               | groupF39 |
| Phobic anxiety disorders (ICD-10: F40)                                                                            | groupF40 |
| Obsessive-compulsive disorder (ICD-10: F42)                                                                       | groupF42 |
| Reaction to severe stress, and adjustment disorders (ICD-10: F43)                                                 | groupF43 |
| Dissociative [conversion] disorders (ICD-10: F44)                                                                 | groupF44 |
| Somatoform disorders (ICD-10: F45)                                                                                | groupF45 |
| Other neurotic disorders (ICD-10: F48)                                                                            | groupF48 |
| Eating disorders (ICD-10: F50)                                                                                    | groupF50 |
| Nonorganic sleep disorders (ICD-10: F51)                                                                          | groupF51 |
| Sexual dysfunction, not caused by organic disorder or disease (ICD-10: F52)                                       | groupF52 |
| Mental and behavioural disorders associated with the puerperium, not elsewhere classified (ICD-10: F53)           | groupF53 |
| Psychological and behavioural factors associated with disorders or diseases classified elsewhere (ICD-10: F54)    | groupF54 |
| Abuse of non-dependence-producing substances (ICD-10: F55)                                                        | groupF55 |
| Unspecified behavioural syndromes associated with physiological disturbances and physical factors (ICD-10: F59)   | groupF59 |
| Specific personality disorders (ICD-10: F60)                                                                      | groupF60 |
| Mixed and other personality disorders (ICD-10: F61)                                                               | groupF61 |
| Enduring personality changes, not attributable to brain damage and disease (ICD-10: F62)                          | groupF62 |
| Habit and impulse disorders (ICD-10: F63)                                                                         | groupF63 |
| Gender identity disorders (ICD-10: F64)                                                                           | groupF64 |
| Disorders of sexual preference (ICD-10: F65)                                                                      | groupF65 |
| Psychological and behavioural disorders associated with sexual development and orientation (ICD-10: F66)          | groupF66 |
| Other disorders of adult personality and behaviour (ICD-10: F68)                                                  | groupF68 |
| Unspecified disorder of adult personality and behaviour (ICD-10: F69)                                             | groupF69 |
| Mild mental retardation (ICD-10: F70)                                                                             | groupF70 |
| Moderate mental retardation (ICD-10: F71)                                                                         | groupF71 |
| Other mental retardation (ICD-10: F78)                                                                            | groupF78 |
| Specific developmental disorders of speech and language (ICD-10: F80)                                             | groupF80 |
| Specific developmental disorders of scholastic skills (ICD-10: F81)                                               | groupF81 |
| Specific developmental disorder of motor function (ICD-10: F82)                                                   | groupF82 |
| Pervasive developmental disorders (ICD-10: F84)                                                                   | groupF84 |
| Unspecified disorder of psychological development (ICD-10: F89)                                                   | groupF89 |
| Hyperkinetic disorders (ICD-10: F90)                                                                              | groupF90 |
| Conduct disorders (ICD-10: F91)                                                                                   | groupF91 |
| Mixed disorders of conduct and emotions (ICD-10: F92)                                                             | groupF92 |
| Disorders of social functioning with onset specific to childhood and adolescence (ICD-10: F94)                    | groupF94 |
| Tic disorders (ICD-10: F95)                                                                                       | groupF95 |
| Other behavioural and emotional disorders with onset usually occurring in childhood and adolescence (ICD-10: F98) | groupF98 |
| Mental disorder, not otherwise specified (ICD-10: F99)                                                            | groupF99 |
| Bacterial meningitis, not elsewhere classified (ICD-10: G00)                                                      | groupG00 |
| Meningitis in bacterial diseases classified elsewhere (ICD-10: G01)                                               | groupG01 |
| Meningitis in other infectious and parasitic diseases classified elsewhere (ICD-10: G02)                          | groupG02 |
| Meningitis due to other and unspecified causes (ICD-10: G03)                                                      | groupG03 |
| Encephalitis, myelitis and encephalomyelitis (ICD-10: G04)                                                        | groupG04 |
| Encephalitis, myelitis and encephalomyelitis in diseases classified elsewhere (ICD-10: G05)                       | groupG05 |
| Intracranial and intraspinal abscess and granuloma (ICD-10: G06)                                                  | groupG06 |
| Intracranial and intraspinal abscess and granuloma in diseases classified elsewhere (ICD-10: G07)                 | groupG07 |
| Intracranial and intraspinal phlebitis and thrombophlebitis (ICD-10: G08)                                         | groupG08 |
| Sequelae of inflammatory diseases of central nervous system (ICD-10: G09)                                         | groupG09 |
| Huntington disease (ICD-10: G10)                                                                                  | groupG10 |
| Hereditary ataxia (ICD-10: G11)                                                                                   | groupG11 |
| Spinal muscular atrophy and related syndromes (ICD-10: G12)                                                       | groupG12 |

|                                                                                                              |          |
|--------------------------------------------------------------------------------------------------------------|----------|
| Systemic atrophies primarily affecting central nervous system in diseases classified elsewhere (ICD-10: G13) | groupG13 |
| Postpolio syndrome (ICD-10: G14)                                                                             | groupG14 |
| Parkinson disease (ICD-10: G20)                                                                              | groupG20 |
| Secondary parkinsonism (ICD-10: G21)                                                                         | groupG21 |
| Other degenerative diseases of basal ganglia (ICD-10: G23)                                                   | groupG23 |
| Dystonia (ICD-10: G24)                                                                                       | groupG24 |
| Other extrapyramidal and movement disorders (ICD-10: G25)                                                    | groupG25 |
| Alzheimer disease (ICD-10: G30)                                                                              | groupG30 |
| Other degenerative diseases of nervous system, not elsewhere classified (ICD-10: G31)                        | groupG31 |
| Other degenerative disorders of nervous system in diseases classified elsewhere (ICD-10: G32)                | groupG32 |
| Multiple sclerosis (ICD-10: G35)                                                                             | groupG35 |
| Other acute disseminated demyelination (ICD-10: G36)                                                         | groupG36 |
| Other demyelinating diseases of central nervous system (ICD-10: G37)                                         | groupG37 |
| Epilepsy (ICD-10: G40)                                                                                       | groupG40 |
| Status epilepticus (ICD-10: G41)                                                                             | groupG41 |
| Other headache syndromes (ICD-10: G44)                                                                       | groupG44 |
| Transient cerebral ischaemic attacks and related syndromes (ICD-10: G45)                                     | groupG45 |
| Sleep disorders (ICD-10: G47)                                                                                | groupG47 |
| Disorders of trigeminal nerve (ICD-10: G50)                                                                  | groupG50 |
| Facial nerve disorders (ICD-10: G51)                                                                         | groupG51 |
| Disorders of other cranial nerves (ICD-10: G52)                                                              | groupG52 |
| Cranial nerve disorders in diseases classified elsewhere (ICD-10: G53)                                       | groupG53 |
| Nerve root and plexus disorders (ICD-10: G54)                                                                | groupG54 |
| Nerve root and plexus compressions in diseases classified elsewhere (ICD-10: G55)                            | groupG55 |
| Mononeuropathies of upper limb (ICD-10: G56)                                                                 | groupG56 |
| Mononeuropathies of lower limb (ICD-10: G57)                                                                 | groupG57 |
| Other mononeuropathies (ICD-10: G58)                                                                         | groupG58 |
| Mononeuropathy in diseases classified elsewhere (ICD-10: G59)                                                | groupG59 |
| Hereditary and idiopathic neuropathy (ICD-10: G60)                                                           | groupG60 |
| Inflammatory polyneuropathy (ICD-10: G61)                                                                    | groupG61 |
| Other polyneuropathies (ICD-10: G62)                                                                         | groupG62 |
| Polyneuropathy in diseases classified elsewhere (ICD-10: G63)                                                | groupG63 |
| Other disorders of peripheral nervous system (ICD-10: G64)                                                   | groupG64 |
| Myasthenia gravis and other myoneural disorders (ICD-10: G70)                                                | groupG70 |
| Primary disorders of muscles (ICD-10: G71)                                                                   | groupG71 |
| Other myopathies (ICD-10: G72)                                                                               | groupG72 |
| Disorders of myoneural junction and muscle in diseases classified elsewhere (ICD-10: G73)                    | groupG73 |
| Cerebral palsy (ICD-10: G80)                                                                                 | groupG80 |
| Hemiplegia (ICD-10: G81)                                                                                     | groupG81 |
| Paraplegia and tetraplegia (ICD-10: G82)                                                                     | groupG82 |
| Other paralytic syndromes (ICD-10: G83)                                                                      | groupG83 |
| Disorders of autonomic nervous system (ICD-10: G90)                                                          | groupG90 |
| Hydrocephalus (ICD-10: G91)                                                                                  | groupG91 |
| Toxic encephalopathy (ICD-10: G92)                                                                           | groupG92 |
| Other disorders of brain (ICD-10: G93)                                                                       | groupG93 |
| Other disorders of brain in diseases classified elsewhere (ICD-10: G94)                                      | groupG94 |
| Other diseases of spinal cord (ICD-10: G95)                                                                  | groupG95 |
| Other disorders of central nervous system (ICD-10: G96)                                                      | groupG96 |
| Postprocedural disorders of nervous system, not elsewhere classified (ICD-10: G97)                           | groupG97 |
| Other disorders of nervous system, not elsewhere classified (ICD-10: G98)                                    | groupG98 |
| Other disorders of nervous system in diseases classified elsewhere (ICD-10: G99)                             | groupG99 |
| Hordeolum and chalazion (ICD-10: H00)                                                                        | groupH00 |
| Other inflammation of eyelid (ICD-10: H01)                                                                   | groupH01 |
| Other disorders of eyelid (ICD-10: H02)                                                                      | groupH02 |
| Disorders of eyelid in diseases classified elsewhere (ICD-10: H03)                                           | groupH03 |
| Disorders of lacrimal system (ICD-10: H04)                                                                   | groupH04 |
| Disorders of orbit (ICD-10: H05)                                                                             | groupH05 |
| Disorders of lacrimal system and orbit in diseases classified elsewhere (ICD-10: H06)                        | groupH06 |
| Conjunctivitis (ICD-10: H10)                                                                                 | groupH10 |
| Other disorders of conjunctiva (ICD-10: H11)                                                                 | groupH11 |
| Disorders of conjunctiva in diseases classified elsewhere (ICD-10: H13)                                      | groupH13 |
| Disorders of sclera (ICD-10: H15)                                                                            | groupH15 |
| Corneal scars and opacities (ICD-10: H17)                                                                    | groupH17 |
| Other disorders of cornea (ICD-10: H18)                                                                      | groupH18 |
| Disorders of sclera and cornea in diseases classified elsewhere (ICD-10: H19)                                | groupH19 |
| Iridocyclitis (ICD-10: H20)                                                                                  | groupH20 |
| Other disorders of iris and ciliary body (ICD-10: H21)                                                       | groupH21 |
| Disorders of iris and ciliary body in diseases classified elsewhere (ICD-10: H22)                            | groupH22 |
| Senile cataract (ICD-10: H25)                                                                                | groupH25 |
| Other cataract (ICD-10: H26)                                                                                 | groupH26 |
| Other disorders of lens (ICD-10: H27)                                                                        | groupH27 |
| Cataract and other disorders of lens in diseases classified elsewhere (ICD-10: H28)                          | groupH28 |
| Chorioretinal inflammation (ICD-10: H30)                                                                     | groupH30 |
| Other disorders of choroid (ICD-10: H31)                                                                     | groupH31 |
| Chorioretinal disorders in diseases classified elsewhere (ICD-10: H32)                                       | groupH32 |
| Retinal detachments and breaks (ICD-10: H33)                                                                 | groupH33 |
| Retinal vascular occlusions (ICD-10: H34)                                                                    | groupH34 |

|                                                                                                   |          |
|---------------------------------------------------------------------------------------------------|----------|
| Other retinal disorders (ICD-10: H35)                                                             | groupH35 |
| Retinal disorders in diseases classified elsewhere (ICD-10: H36)                                  | groupH36 |
| Glaucoma (ICD-10: H40)                                                                            | groupH40 |
| Glaucoma in diseases classified elsewhere (ICD-10: H42)                                           | groupH42 |
| Disorders of vitreous body (ICD-10: H43)                                                          | groupH43 |
| Disorders of globe (ICD-10: H44)                                                                  | groupH44 |
| Disorders of vitreous body and globe in diseases classified elsewhere (ICD-10: H45)               | groupH45 |
| Optic neuritis (ICD-10: H46)                                                                      | groupH46 |
| Other disorders of optic [2nd] nerve and visual pathways (ICD-10: H47)                            | groupH47 |
| Disorders of optic [2nd] nerve and visual pathways in diseases classified elsewhere (ICD-10: H48) | groupH48 |
| Paralytic strabismus (ICD-10: H49)                                                                | groupH49 |
| Other strabismus (ICD-10: H50)                                                                    | groupH50 |
| Disorders of refraction and accommodation (ICD-10: H52)                                           | groupH52 |
| Visual disturbances (ICD-10: H53)                                                                 | groupH53 |
| Visual impairment including blindness (binocular or monocular) (ICD-10: H54)                      | groupH54 |
| Nystagmus and other irregular eye movements (ICD-10: H55)                                         | groupH55 |
| Other disorders of eye and adnexa (ICD-10: H57)                                                   | groupH57 |
| Other disorders of eye and adnexa in diseases classified elsewhere (ICD-10: H58)                  | groupH58 |
| Postprocedural disorders of eye and adnexa, not elsewhere classified (ICD-10: H59)                | groupH59 |
| Otitis externa (ICD-10: H60)                                                                      | groupH60 |
| Other disorders of external ear (ICD-10: H61)                                                     | groupH61 |
| Disorders of external ear in diseases classified elsewhere (ICD-10: H62)                          | groupH62 |
| Nonsuppurative otitis media (ICD-10: H65)                                                         | groupH65 |
| Suppurative and unspecified otitis media (ICD-10: H66)                                            | groupH66 |
| Otitis media in diseases classified elsewhere (ICD-10: H67)                                       | groupH67 |
| Eustachian salpingitis and obstruction (ICD-10: H68)                                              | groupH68 |
| Other disorders of Eustachian tube (ICD-10: H69)                                                  | groupH69 |
| Mastoiditis and related conditions (ICD-10: H70)                                                  | groupH70 |
| Cholesteatoma of middle ear (ICD-10: H71)                                                         | groupH71 |
| Perforation of tympanic membrane (ICD-10: H72)                                                    | groupH72 |
| Other disorders of tympanic membrane (ICD-10: H73)                                                | groupH73 |
| Other disorders of middle ear and mastoid (ICD-10: H74)                                           | groupH74 |
| Other disorders of middle ear and mastoid in diseases classified elsewhere (ICD-10: H75)          | groupH75 |
| Otosclerosis (ICD-10: H80)                                                                        | groupH80 |
| Disorders of vestibular function (ICD-10: H81)                                                    | groupH81 |
| Other diseases of inner ear (ICD-10: H83)                                                         | groupH83 |
| Conductive and sensorineural hearing loss (ICD-10: H90)                                           | groupH90 |
| Other hearing loss (ICD-10: H91)                                                                  | groupH91 |
| Otalgia and effusion of ear (ICD-10: H92)                                                         | groupH92 |
| Other disorders of ear, not elsewhere classified (ICD-10: H93)                                    | groupH93 |
| Other disorders of ear in diseases classified elsewhere (ICD-10: H94)                             | groupH94 |
| Postprocedural disorders of ear and mastoid process, not elsewhere classified (ICD-10: H95)       | groupH95 |
| Rheumatic fever without mention of heart involvement (ICD-10: I00)                                | groupI00 |
| Rheumatic fever with heart involvement (ICD-10: I01)                                              | groupI01 |
| Rheumatic chorea (ICD-10: I02)                                                                    | groupI02 |
| Rheumatic aortic valve diseases (ICD-10: I06)                                                     | groupI06 |
| Rheumatic tricuspid valve diseases (ICD-10: I07)                                                  | groupI07 |
| Multiple valve diseases (ICD-10: I08)                                                             | groupI08 |
| Other rheumatic heart diseases (ICD-10: I09)                                                      | groupI09 |
| Hypertensive heart disease (ICD-10: I11)                                                          | groupI11 |
| Hypertensive renal disease (ICD-10: I12)                                                          | groupI12 |
| Hypertensive heart and renal disease (ICD-10: I13)                                                | groupI13 |
| Secondary hypertension (ICD-10: I15)                                                              | groupI15 |
| Angina pectoris (ICD-10: I20)                                                                     | groupI20 |
| Acute myocardial infarction (ICD-10: I21)                                                         | groupI21 |
| Subsequent myocardial infarction (ICD-10: I22)                                                    | groupI22 |
| Certain current complications following acute myocardial infarction (ICD-10: I23)                 | groupI23 |
| Other acute ischaemic heart diseases (ICD-10: I24)                                                | groupI24 |
| Chronic ischaemic heart disease (ICD-10: I25)                                                     | groupI25 |
| Pulmonary embolism (ICD-10: I26)                                                                  | groupI26 |
| Other pulmonary heart diseases (ICD-10: I27)                                                      | groupI27 |
| Other diseases of pulmonary vessels (ICD-10: I28)                                                 | groupI28 |
| Acute pericarditis (ICD-10: I30)                                                                  | groupI30 |
| Other diseases of pericardium (ICD-10: I31)                                                       | groupI31 |
| Pericarditis in diseases classified elsewhere (ICD-10: I32)                                       | groupI32 |
| Acute and subacute endocarditis (ICD-10: I33)                                                     | groupI33 |
| Nonrheumatic mitral valve disorders (ICD-10: I34)                                                 | groupI34 |
| Nonrheumatic aortic valve disorders (ICD-10: I35)                                                 | groupI35 |
| Nonrheumatic tricuspid valve disorders (ICD-10: I36)                                              | groupI36 |
| Pulmonary valve disorders (ICD-10: I37)                                                           | groupI37 |
| Endocarditis and heart valve disorders in diseases classified elsewhere (ICD-10: I39)             | groupI39 |
| Acute myocarditis (ICD-10: I40)                                                                   | groupI40 |
| Myocarditis in diseases classified elsewhere (ICD-10: I41)                                        | groupI41 |
| Cardiomyopathy (ICD-10: I42)                                                                      | groupI42 |
| Cardiomyopathy in diseases classified elsewhere (ICD-10: I43)                                     | groupI43 |
| Atrioventricular and left bundle-branch block (ICD-10: I44)                                       | groupI44 |
| Other conduction disorders (ICD-10: I45)                                                          | groupI45 |

|                                                                                                    |          |
|----------------------------------------------------------------------------------------------------|----------|
| Cardiac arrest (ICD-10: I46)                                                                       | groupI46 |
| Paroxysmal tachycardia (ICD-10: I47)                                                               | groupI47 |
| Other cardiac arrhythmias (ICD-10: I49)                                                            | groupI49 |
| Heart failure (ICD-10: I50)                                                                        | groupI50 |
| Complications and ill-defined descriptions of heart disease (ICD-10: I51)                          | groupI51 |
| Other heart disorders in diseases classified elsewhere (ICD-10: I52)                               | groupI52 |
| Subarachnoid haemorrhage (ICD-10: I60)                                                             | groupI60 |
| Other nontraumatic intracranial haemorrhage (ICD-10: I62)                                          | groupI62 |
| Cerebral infarction (ICD-10: I63)                                                                  | groupI63 |
| Stroke, not specified as haemorrhage or infarction (ICD-10: I64)                                   | groupI64 |
| Occlusion and stenosis of precerebral arteries, not resulting in cerebral infarction (ICD-10: I65) | groupI65 |
| Occlusion and stenosis of cerebral arteries, not resulting in cerebral infarction (ICD-10: I66)    | groupI66 |
| Other cerebrovascular diseases (ICD-10: I67)                                                       | groupI67 |
| Cerebrovascular disorders in diseases classified elsewhere (ICD-10: I68)                           | groupI68 |
| Sequelae of cerebrovascular disease (ICD-10: I69)                                                  | groupI69 |
| Atherosclerosis (ICD-10: I70)                                                                      | groupI70 |
| Aortic aneurysm and dissection (ICD-10: I71)                                                       | groupI71 |
| Other aneurysm and dissection (ICD-10: I72)                                                        | groupI72 |
| Arterial embolism and thrombosis (ICD-10: I74)                                                     | groupI74 |
| Other disorders of arteries and arterioles (ICD-10: I77)                                           | groupI77 |
| Disorders of arteries, arterioles and capillaries in diseases classified elsewhere (ICD-10: I79)   | groupI79 |
| Hypotension (ICD-10: I95)                                                                          | groupI95 |
| Postprocedural disorders of circulatory system, not elsewhere classified (ICD-10: I97)             | groupI97 |
| Other disorders of circulatory system in diseases classified elsewhere (ICD-10: I98)               | groupI98 |
| Other and unspecified disorders of circulatory system (ICD-10: I99)                                | groupI99 |
| Acute nasopharyngitis [common cold] (ICD-10: J00)                                                  | groupJ00 |
| Acute sinusitis (ICD-10: J01)                                                                      | groupJ01 |
| Acute pharyngitis (ICD-10: J02)                                                                    | groupJ02 |
| Acute tonsillitis (ICD-10: J03)                                                                    | groupJ03 |
| Acute laryngitis and tracheitis (ICD-10: J04)                                                      | groupJ04 |
| Acute obstructive laryngitis [croup] and epiglottitis (ICD-10: J05)                                | groupJ05 |
| Acute upper respiratory infections of multiple and unspecified sites (ICD-10: J06)                 | groupJ06 |
| Influenza due to certain identified influenza virus (ICD-10: J09)                                  | groupJ09 |
| Influenza due to other identified influenza virus (ICD-10: J10)                                    | groupJ10 |
| Influenza, virus not identified (ICD-10: J11)                                                      | groupJ11 |
| Viral pneumonia, not elsewhere classified (ICD-10: J12)                                            | groupJ12 |
| Pneumonia due to Streptococcus pneumoniae (ICD-10: J13)                                            | groupJ13 |
| Pneumonia due to Haemophilus influenzae (ICD-10: J14)                                              | groupJ14 |
| Bacterial pneumonia, not elsewhere classified (ICD-10: J15)                                        | groupJ15 |
| Pneumonia due to other infectious organisms, not elsewhere classified (ICD-10: J16)                | groupJ16 |
| Pneumonia in diseases classified elsewhere (ICD-10: J17)                                           | groupJ17 |
| Pneumonia, organism unspecified (ICD-10: J18)                                                      | groupJ18 |
| Acute bronchitis (ICD-10: J20)                                                                     | groupJ20 |
| Acute bronchiolitis (ICD-10: J21)                                                                  | groupJ21 |
| Unspecified acute lower respiratory infection (ICD-10: J22)                                        | groupJ22 |
| Vasomotor and allergic rhinitis (ICD-10: J30)                                                      | groupJ30 |
| Chronic rhinitis, nasopharyngitis and pharyngitis (ICD-10: J31)                                    | groupJ31 |
| Chronic sinusitis (ICD-10: J32)                                                                    | groupJ32 |
| Nasal polyp (ICD-10: J33)                                                                          | groupJ33 |
| Chronic diseases of tonsils and adenoids (ICD-10: J35)                                             | groupJ35 |
| Peritonsillar abscess (ICD-10: J36)                                                                | groupJ36 |
| Chronic laryngitis and laryngotracheitis (ICD-10: J37)                                             | groupJ37 |
| Diseases of vocal cords and larynx, not elsewhere classified (ICD-10: J38)                         | groupJ38 |
| Other diseases of upper respiratory tract (ICD-10: J39)                                            | groupJ39 |
| Bronchitis, not specified as acute or chronic (ICD-10: J40)                                        | groupJ40 |
| Simple and mucopurulent chronic bronchitis (ICD-10: J41)                                           | groupJ41 |
| Unspecified chronic bronchitis (ICD-10: J42)                                                       | groupJ42 |
| Emphysema (ICD-10: J43)                                                                            | groupJ43 |
| Other chronic obstructive pulmonary disease (ICD-10: J44)                                          | groupJ44 |
| Asthma (ICD-10: J45)                                                                               | groupJ45 |
| Bronchiectasis (ICD-10: J47)                                                                       | groupJ47 |
| Coalworker pneumoconiosis (ICD-10: J60)                                                            | groupJ60 |
| Pneumoconiosis due to asbestos and other mineral fibres (ICD-10: J61)                              | groupJ61 |
| Pneumoconiosis due to dust containing silica (ICD-10: J62)                                         | groupJ62 |
| Pneumoconiosis due to other inorganic dusts (ICD-10: J63)                                          | groupJ63 |
| Unspecified pneumoconiosis (ICD-10: J64)                                                           | groupJ64 |
| Airway disease due to specific organic dust (ICD-10: J66)                                          | groupJ66 |
| Hypersensitivity pneumonitis due to organic dust (ICD-10: J67)                                     | groupJ67 |
| Respiratory conditions due to inhalation of chemicals, gases, fumes and vapours (ICD-10: J68)      | groupJ68 |
| Pneumonitis due to solids and liquids (ICD-10: J69)                                                | groupJ69 |
| Respiratory conditions due to other external agents (ICD-10: J70)                                  | groupJ70 |
| Adult respiratory distress syndrome (ICD-10: J80)                                                  | groupJ80 |
| Pulmonary oedema (ICD-10: J81)                                                                     | groupJ81 |
| Pulmonary eosinophilia, not elsewhere classified (ICD-10: J82)                                     | groupJ82 |
| Abscess of lung and mediastinum (ICD-10: J85)                                                      | groupJ85 |
| Pyothorax (ICD-10: J86)                                                                            | groupJ86 |
| Pleural effusion, not elsewhere classified (ICD-10: J90)                                           | groupJ90 |

|                                                                                                     |          |
|-----------------------------------------------------------------------------------------------------|----------|
| Pleural effusion in conditions classified elsewhere (ICD-10: J91)                                   | groupJ91 |
| Pleural plaque (ICD-10: J92)                                                                        | groupJ92 |
| Pneumothorax (ICD-10: J93)                                                                          | groupJ93 |
| Other pleural conditions (ICD-10: J94)                                                              | groupJ94 |
| Postprocedural respiratory disorders, not elsewhere classified (ICD-10: J95)                        | groupJ95 |
| Respiratory failure, not elsewhere classified (ICD-10: J96)                                         | groupJ96 |
| Other respiratory disorders (ICD-10: J98)                                                           | groupJ98 |
| Respiratory disorders in diseases classified elsewhere (ICD-10: J99)                                | groupJ99 |
| Disorders of tooth development and eruption (ICD-10: K00)                                           | groupK00 |
| Embedded and impacted teeth (ICD-10: K01)                                                           | groupK01 |
| Dental caries (ICD-10: K02)                                                                         | groupK02 |
| Other diseases of hard tissues of teeth (ICD-10: K03)                                               | groupK03 |
| Diseases of pulp and periapical tissues (ICD-10: K04)                                               | groupK04 |
| Gingivitis and periodontal diseases (ICD-10: K05)                                                   | groupK05 |
| Other disorders of teeth and supporting structures (ICD-10: K08)                                    | groupK08 |
| Cysts of oral region, not elsewhere classified (ICD-10: K09)                                        | groupK09 |
| Other diseases of jaws (ICD-10: K10)                                                                | groupK10 |
| Diseases of salivary glands (ICD-10: K11)                                                           | groupK11 |
| Stomatitis and related lesions (ICD-10: K12)                                                        | groupK12 |
| Other diseases of lip and oral mucosa (ICD-10: K13)                                                 | groupK13 |
| Diseases of tongue (ICD-10: K14)                                                                    | groupK14 |
| Oesophagitis (ICD-10: K20)                                                                          | groupK20 |
| Other diseases of oesophagus (ICD-10: K22)                                                          | groupK22 |
| Disorders of oesophagus in diseases classified elsewhere (ICD-10: K23)                              | groupK23 |
| Gastric ulcer (ICD-10: K25)                                                                         | groupK25 |
| Duodenal ulcer (ICD-10: K26)                                                                        | groupK26 |
| Peptic ulcer, site unspecified (ICD-10: K27)                                                        | groupK27 |
| Gastrojejunal ulcer (ICD-10: K28)                                                                   | groupK28 |
| Other diseases of stomach and duodenum (ICD-10: K31)                                                | groupK31 |
| Acute appendicitis (ICD-10: K35)                                                                    | groupK35 |
| Other appendicitis (ICD-10: K36)                                                                    | groupK36 |
| Unspecified appendicitis (ICD-10: K37)                                                              | groupK37 |
| Other diseases of appendix (ICD-10: K38)                                                            | groupK38 |
| Ventral hernia (ICD-10: K43)                                                                        | groupK43 |
| Diaphragmatic hernia (ICD-10: K44)                                                                  | groupK44 |
| Other abdominal hernia (ICD-10: K45)                                                                | groupK45 |
| Unspecified abdominal hernia (ICD-10: K46)                                                          | groupK46 |
| Crohn disease [regional enteritis] (ICD-10: K50)                                                    | groupK50 |
| Ulcerative colitis (ICD-10: K51)                                                                    | groupK51 |
| Other noninfective gastroenteritis and colitis (ICD-10: K52)                                        | groupK52 |
| Vascular disorders of intestine (ICD-10: K55)                                                       | groupK55 |
| Paralytic ileus and intestinal obstruction without hernia (ICD-10: K56)                             | groupK56 |
| Irritable bowel syndrome (ICD-10: K58)                                                              | groupK58 |
| Other functional intestinal disorders (ICD-10: K59)                                                 | groupK59 |
| Fissure and fistula of anal and rectal regions (ICD-10: K60)                                        | groupK60 |
| Abscess of anal and rectal regions (ICD-10: K61)                                                    | groupK61 |
| Other diseases of anus and rectum (ICD-10: K62)                                                     | groupK62 |
| Peritonitis (ICD-10: K65)                                                                           | groupK65 |
| Other disorders of peritoneum (ICD-10: K66)                                                         | groupK66 |
| Disorders of peritoneum in infectious diseases classified elsewhere (ICD-10: K67)                   | groupK67 |
| Alcoholic liver disease (ICD-10: K70)                                                               | groupK70 |
| Toxic liver disease (ICD-10: K71)                                                                   | groupK71 |
| Hepatic failure, not elsewhere classified (ICD-10: K72)                                             | groupK72 |
| Chronic hepatitis, not elsewhere classified (ICD-10: K73)                                           | groupK73 |
| Fibrosis and cirrhosis of liver (ICD-10: K74)                                                       | groupK74 |
| Other inflammatory liver diseases (ICD-10: K75)                                                     | groupK75 |
| Other diseases of liver (ICD-10: K76)                                                               | groupK76 |
| Liver disorders in diseases classified elsewhere (ICD-10: K77)                                      | groupK77 |
| Cholelithiasis (ICD-10: K80)                                                                        | groupK80 |
| Cholecystitis (ICD-10: K81)                                                                         | groupK81 |
| Other diseases of gallbladder (ICD-10: K82)                                                         | groupK82 |
| Other diseases of biliary tract (ICD-10: K83)                                                       | groupK83 |
| Acute pancreatitis (ICD-10: K85)                                                                    | groupK85 |
| Other diseases of pancreas (ICD-10: K86)                                                            | groupK86 |
| Disorders of gallbladder, biliary tract and pancreas in diseases classified elsewhere (ICD-10: K87) | groupK87 |
| Intestinal malabsorption (ICD-10: K90)                                                              | groupK90 |
| Postprocedural disorders of digestive system, not elsewhere classified (ICD-10: K91)                | groupK91 |
| Disorders of other digestive organs in diseases classified elsewhere (ICD-10: K93)                  | groupK93 |
| Staphylococcal scalded skin syndrome (ICD-10: L00)                                                  | groupL00 |
| Impetigo (ICD-10: L01)                                                                              | groupL01 |
| Acute lymphadenitis (ICD-10: L04)                                                                   | groupL04 |
| Pilonidal cyst (ICD-10: L05)                                                                        | groupL05 |
| Pemphigus (ICD-10: L10)                                                                             | groupL10 |
| Other acantholytic disorders (ICD-10: L11)                                                          | groupL11 |
| Pemphigoid (ICD-10: L12)                                                                            | groupL12 |
| Other bullous disorders (ICD-10: L13)                                                               | groupL13 |
| Bullous disorders in diseases classified elsewhere (ICD-10: L14)                                    | groupL14 |

|                                                                                                    |          |
|----------------------------------------------------------------------------------------------------|----------|
| Atopic dermatitis (ICD-10: L20)                                                                    | groupL20 |
| Seborrheic dermatitis (ICD-10: L21)                                                                | groupL21 |
| Diaper [napkin] dermatitis (ICD-10: L22)                                                           | groupL22 |
| Irritant contact dermatitis (ICD-10: L24)                                                          | groupL24 |
| Unspecified contact dermatitis (ICD-10: L25)                                                       | groupL25 |
| Exfoliative dermatitis (ICD-10: L26)                                                               | groupL26 |
| Lichen simplex chronicus and prurigo (ICD-10: L28)                                                 | groupL28 |
| Pruritus (ICD-10: L29)                                                                             | groupL29 |
| Psoriasis (ICD-10: L40)                                                                            | groupL40 |
| Parapsoriasis (ICD-10: L41)                                                                        | groupL41 |
| Pityriasis rosea (ICD-10: L42)                                                                     | groupL42 |
| Lichen planus (ICD-10: L43)                                                                        | groupL43 |
| Other papulosquamous disorders (ICD-10: L44)                                                       | groupL44 |
| Erythema multiforme (ICD-10: L51)                                                                  | groupL51 |
| Erythema nodosum (ICD-10: L52)                                                                     | groupL52 |
| Erythema in diseases classified elsewhere (ICD-10: L54)                                            | groupL54 |
| Sunburn (ICD-10: L55)                                                                              | groupL55 |
| Other acute skin changes due to ultraviolet radiation (ICD-10: L56)                                | groupL56 |
| Radiodermatitis (ICD-10: L58)                                                                      | groupL58 |
| Nail disorders (ICD-10: L60)                                                                       | groupL60 |
| Alopecia areata (ICD-10: L63)                                                                      | groupL63 |
| Androgenic alopecia (ICD-10: L64)                                                                  | groupL64 |
| Other nonscarring hair loss (ICD-10: L65)                                                          | groupL65 |
| Cicatricial alopecia [scarring hair loss] (ICD-10: L66)                                            | groupL66 |
| Hypertrichosis (ICD-10: L68)                                                                       | groupL68 |
| Acne (ICD-10: L70)                                                                                 | groupL70 |
| Rosacea (ICD-10: L71)                                                                              | groupL71 |
| Follicular cysts of skin and subcutaneous tissue (ICD-10: L72)                                     | groupL72 |
| Other follicular disorders (ICD-10: L73)                                                           | groupL73 |
| Eccrine sweat disorders (ICD-10: L74)                                                              | groupL74 |
| Apocrine sweat disorders (ICD-10: L75)                                                             | groupL75 |
| Other disorders of pigmentation (ICD-10: L81)                                                      | groupL81 |
| Seborrheic keratosis (ICD-10: L82)                                                                 | groupL82 |
| Corns and callosities (ICD-10: L84)                                                                | groupL84 |
| Other epidermal thickening (ICD-10: L85)                                                           | groupL85 |
| Transepidermal elimination disorders (ICD-10: L87)                                                 | groupL87 |
| Pyoderma gangrenosum (ICD-10: L88)                                                                 | groupL88 |
| Decubitus ulcer and pressure area (ICD-10: L89)                                                    | groupL89 |
| Atrophic disorders of skin (ICD-10: L90)                                                           | groupL90 |
| Hypertrophic disorders of skin (ICD-10: L91)                                                       | groupL91 |
| Granulomatous disorders of skin and subcutaneous tissue (ICD-10: L92)                              | groupL92 |
| Lupus erythematosus (ICD-10: L93)                                                                  | groupL93 |
| Other localized connective tissue disorders (ICD-10: L94)                                          | groupL94 |
| Vasculitis limited to skin, not elsewhere classified (ICD-10: L95)                                 | groupL95 |
| Other disorders of skin and subcutaneous tissue in diseases classified elsewhere (ICD-10: L99)     | groupL99 |
| Pyogenic arthritis (ICD-10: M00)                                                                   | groupM00 |
| Direct infections of joint in infectious and parasitic diseases classified elsewhere (ICD-10: M01) | groupM01 |
| Reactive arthropathies (ICD-10: M02)                                                               | groupM02 |
| Postinfective and reactive arthropathies in diseases classified elsewhere (ICD-10: M03)            | groupM03 |
| Seropositive rheumatoid arthritis (ICD-10: M05)                                                    | groupM05 |
| Other rheumatoid arthritis (ICD-10: M06)                                                           | groupM06 |
| Psoriatic and enteropathic arthropathies (ICD-10: M07)                                             | groupM07 |
| Juvenile arthritis (ICD-10: M08)                                                                   | groupM08 |
| Gout (ICD-10: M10)                                                                                 | groupM10 |
| Other crystal arthropathies (ICD-10: M11)                                                          | groupM11 |
| Other specific arthropathies (ICD-10: M12)                                                         | groupM12 |
| Arthropathies in other diseases classified elsewhere (ICD-10: M14)                                 | groupM14 |
| Gonarthrosis [arthrosis of knee] (ICD-10: M17)                                                     | groupM17 |
| Arthrosis of first carpometacarpal joint (ICD-10: M18)                                             | groupM18 |
| Other acquired deformities of limbs (ICD-10: M21)                                                  | groupM21 |
| Disorders of patella (ICD-10: M22)                                                                 | groupM22 |
| Other specific joint derangements (ICD-10: M24)                                                    | groupM24 |
| Other joint disorders, not elsewhere classified (ICD-10: M25)                                      | groupM25 |
| Polyarteritis nodosa and related conditions (ICD-10: M30)                                          | groupM30 |
| Other necrotizing vasculopathies (ICD-10: M31)                                                     | groupM31 |
| Systemic lupus erythematosus (ICD-10: M32)                                                         | groupM32 |
| Dermatopolymyositis (ICD-10: M33)                                                                  | groupM33 |
| Systemic sclerosis (ICD-10: M34)                                                                   | groupM34 |
| Other systemic involvement of connective tissue (ICD-10: M35)                                      | groupM35 |
| Systemic disorders of connective tissue in diseases classified elsewhere (ICD-10: M36)             | groupM36 |
| Kyphosis and lordosis (ICD-10: M40)                                                                | groupM40 |
| Scoliosis (ICD-10: M41)                                                                            | groupM41 |
| Spinal osteochondrosis (ICD-10: M42)                                                               | groupM42 |
| Other deforming dorsopathies (ICD-10: M43)                                                         | groupM43 |
| Ankylosing spondylitis (ICD-10: M45)                                                               | groupM45 |
| Other inflammatory spondylopathies (ICD-10: M46)                                                   | groupM46 |
| Spondylolysis (ICD-10: M47)                                                                        | groupM47 |

|                                                                                          |          |
|------------------------------------------------------------------------------------------|----------|
| Other spondylopathies (ICD-10: M48)                                                      | groupM48 |
| Spondylopathies in diseases classified elsewhere (ICD-10: M49)                           | groupM49 |
| Cervical disc disorders (ICD-10: M50)                                                    | groupM50 |
| Other intervertebral disc disorders (ICD-10: M51)                                        | groupM51 |
| Other dorsopathies, not elsewhere classified (ICD-10: M53)                               | groupM53 |
| Dorsalgia (ICD-10: M54)                                                                  | groupM54 |
| Myositis (ICD-10: M60)                                                                   | groupM60 |
| Calcification and ossification of muscle (ICD-10: M61)                                   | groupM61 |
| Other disorders of muscle (ICD-10: M62)                                                  | groupM62 |
| Synovitis and tenosynovitis (ICD-10: M65)                                                | groupM65 |
| Spontaneous rupture of synovium and tendon (ICD-10: M66)                                 | groupM66 |
| Other disorders of synovium and tendon (ICD-10: M67)                                     | groupM67 |
| Disorders of synovium and tendon in diseases classified elsewhere (ICD-10: M68)          | groupM68 |
| Soft tissue disorders related to use, overuse and pressure (ICD-10: M70)                 | groupM70 |
| Other bursopathies (ICD-10: M71)                                                         | groupM71 |
| Fibroblastic disorders (ICD-10: M72)                                                     | groupM72 |
| Shoulder lesions (ICD-10: M75)                                                           | groupM75 |
| Enthesopathies of lower limb, excluding foot (ICD-10: M76)                               | groupM76 |
| Other enthesopathies (ICD-10: M77)                                                       | groupM77 |
| Osteoporosis with pathological fracture (ICD-10: M80)                                    | groupM80 |
| Osteoporosis in diseases classified elsewhere (ICD-10: M82)                              | groupM82 |
| Adult osteomalacia (ICD-10: M83)                                                         | groupM83 |
| Disorders of continuity of bone (ICD-10: M84)                                            | groupM84 |
| Other disorders of bone density and structure (ICD-10: M85)                              | groupM85 |
| Osteomyelitis (ICD-10: M86)                                                              | groupM86 |
| Osteonecrosis (ICD-10: M87)                                                              | groupM87 |
| Paget disease of bone [osteitis deformans] (ICD-10: M88)                                 | groupM88 |
| Other disorders of bone (ICD-10: M89)                                                    | groupM89 |
| Osteopathies in diseases classified elsewhere (ICD-10: M90)                              | groupM90 |
| Juvenile osteochondrosis of hip and pelvis (ICD-10: M91)                                 | groupM91 |
| Other juvenile osteochondrosis (ICD-10: M92)                                             | groupM92 |
| Other osteochondropathies (ICD-10: M93)                                                  | groupM93 |
| Other disorders of cartilage (ICD-10: M94)                                               | groupM94 |
| Other acquired deformities of musculoskeletal system and connective tissue (ICD-10: M95) | groupM95 |
| Postprocedural musculoskeletal disorders, not elsewhere classified (ICD-10: M96)         | groupM96 |
| Biomechanical lesions, not elsewhere classified (ICD-10: M99)                            | groupM99 |
| Acute nephritic syndrome (ICD-10: N00)                                                   | groupN00 |
| Rapidly progressive nephritic syndrome (ICD-10: N01)                                     | groupN01 |
| Recurrent and persistent haematuria (ICD-10: N02)                                        | groupN02 |
| Chronic nephritic syndrome (ICD-10: N03)                                                 | groupN03 |
| Nephrotic syndrome (ICD-10: N04)                                                         | groupN04 |
| Unspecified nephritic syndrome (ICD-10: N05)                                             | groupN05 |
| Isolated proteinuria with specified morphological lesion (ICD-10: N06)                   | groupN06 |
| Hereditary nephropathy, not elsewhere classified (ICD-10: N07)                           | groupN07 |
| Glomerular disorders in diseases classified elsewhere (ICD-10: N08)                      | groupN08 |
| Acute tubulo-interstitial nephritis (ICD-10: N10)                                        | groupN10 |
| Tubulo-interstitial nephritis, not specified as acute or chronic (ICD-10: N12)           | groupN12 |
| Obstructive and reflux uropathy (ICD-10: N13)                                            | groupN13 |
| Drug- and heavy-metal-induced tubulo-interstitial and tubular conditions (ICD-10: N14)   | groupN14 |
| Other renal tubulo-interstitial diseases (ICD-10: N15)                                   | groupN15 |
| Renal tubulo-interstitial disorders in diseases classified elsewhere (ICD-10: N16)       | groupN16 |
| Acute renal failure (ICD-10: N17)                                                        | groupN17 |
| Chronic kidney disease (ICD-10: N18)                                                     | groupN18 |
| Unspecified kidney failure (ICD-10: N19)                                                 | groupN19 |
| Calculus of kidney and ureter (ICD-10: N20)                                              | groupN20 |
| Calculus of lower urinary tract (ICD-10: N21)                                            | groupN21 |
| Unspecified renal colic (ICD-10: N23)                                                    | groupN23 |
| Disorders resulting from impaired renal tubular function (ICD-10: N25)                   | groupN25 |
| Unspecified contracted kidney (ICD-10: N26)                                              | groupN26 |
| Small kidney of unknown cause (ICD-10: N27)                                              | groupN27 |
| Other disorders of kidney and ureter, not elsewhere classified (ICD-10: N28)             | groupN28 |
| Other disorders of kidney and ureter in diseases classified elsewhere (ICD-10: N29)      | groupN29 |
| Cystitis (ICD-10: N30)                                                                   | groupN30 |
| Neuromuscular dysfunction of bladder, not elsewhere classified (ICD-10: N31)             | groupN31 |
| Other disorders of bladder (ICD-10: N32)                                                 | groupN32 |
| Bladder disorders in diseases classified elsewhere (ICD-10: N33)                         | groupN33 |
| Urethral stricture (ICD-10: N35)                                                         | groupN35 |
| Other disorders of urethra (ICD-10: N36)                                                 | groupN36 |
| Urethral disorders in diseases classified elsewhere (ICD-10: N37)                        | groupN37 |
| Hyperplasia of prostate (ICD-10: N40)                                                    | groupN40 |
| Inflammatory diseases of prostate (ICD-10: N41)                                          | groupN41 |
| Other disorders of prostate (ICD-10: N42)                                                | groupN42 |
| Hydrocele and spermatocele (ICD-10: N43)                                                 | groupN43 |
| Torsion of testis (ICD-10: N44)                                                          | groupN44 |
| Orchitis and epididymitis (ICD-10: N45)                                                  | groupN45 |
| Male infertility (ICD-10: N46)                                                           | groupN46 |
| Redundant prepuce, phimosis and paraphimosis (ICD-10: N47)                               | groupN47 |



|                                                                                                    |          |
|----------------------------------------------------------------------------------------------------|----------|
| Other disorders of penis (ICD-10: N48)                                                             | groupN48 |
| Inflammatory disorders of male genital organs, not elsewhere classified (ICD-10: N49)              | groupN49 |
| Other disorders of male genital organs (ICD-10: N50)                                               | groupN50 |
| Disorders of male genital organs in diseases classified elsewhere (ICD-10: N51)                    | groupN51 |
| Inflammatory disorders of breast (ICD-10: N61)                                                     | groupN61 |
| Hypertrophy of breast (ICD-10: N62)                                                                | groupN62 |
| Other disorders of breast (ICD-10: N64)                                                            | groupN64 |
| Salpingitis and oophoritis (ICD-10: N70)                                                           | groupN70 |
| Inflammatory disease of cervix uteri (ICD-10: N72)                                                 | groupN72 |
| Other female pelvic inflammatory diseases (ICD-10: N73)                                            | groupN73 |
| Female pelvic inflammatory disorders in diseases classified elsewhere (ICD-10: N74)                | groupN74 |
| Diseases of Bartholin gland (ICD-10: N75)                                                          | groupN75 |
| Other inflammation of vagina and vulva (ICD-10: N76)                                               | groupN76 |
| Endometriosis (ICD-10: N80)                                                                        | groupN80 |
| Fistulae involving female genital tract (ICD-10: N82)                                              | groupN82 |
| Noninflammatory disorders of ovary, fallopian tube and broad ligament (ICD-10: N83)                | groupN83 |
| Polyp of female genital tract (ICD-10: N84)                                                        | groupN84 |
| Other noninflammatory disorders of uterus, except cervix (ICD-10: N85)                             | groupN85 |
| Dysplasia of cervix uteri (ICD-10: N87)                                                            | groupN87 |
| Other noninflammatory disorders of cervix uteri (ICD-10: N88)                                      | groupN88 |
| Other noninflammatory disorders of vulva and perineum (ICD-10: N90)                                | groupN90 |
| Absent, scanty and rare menstruation (ICD-10: N91)                                                 | groupN91 |
| Excessive, frequent and irregular menstruation (ICD-10: N92)                                       | groupN92 |
| Other abnormal uterine and vaginal bleeding (ICD-10: N93)                                          | groupN93 |
| Menopausal and other perimenopausal disorders (ICD-10: N95)                                        | groupN95 |
| Habitual aborter (ICD-10: N96)                                                                     | groupN96 |
| Female infertility (ICD-10: N97)                                                                   | groupN97 |
| Complications associated with artificial fertilization (ICD-10: N98)                               | groupN98 |
| Postprocedural disorders of genitourinary system, not elsewhere classified (ICD-10: N99)           | groupN99 |
| Ectopic pregnancy (ICD-10: O00)                                                                    | groupO00 |
| Hydatidiform mole (ICD-10: O01)                                                                    | groupO01 |
| Other abnormal products of conception (ICD-10: O02)                                                | groupO02 |
| Spontaneous abortion (ICD-10: O03)                                                                 | groupO03 |
| Medical abortion (ICD-10: O04)                                                                     | groupO04 |
| Unspecified abortion (ICD-10: O06)                                                                 | groupO06 |
| Failed attempted abortion (ICD-10: O07)                                                            | groupO07 |
| Complications following abortion and ectopic and molar pregnancy (ICD-10: O08)                     | groupO08 |
| Pre-existing hypertension complicating pregnancy, childbirth and the puerperium (ICD-10: O10)      | groupO10 |
| Pre-existing hypertensive disorder with superimposed proteinuria (ICD-10: O11)                     | groupO11 |
| Gestational [pregnancy-induced] oedema and proteinuria without hypertension (ICD-10: O12)          | groupO12 |
| Gestational [pregnancy-induced] hypertension without significant proteinuria (ICD-10: O13)         | groupO13 |
| Gestational [pregnancy-induced] hypertension with significant proteinuria (ICD-10: O14)            | groupO14 |
| Eclampsia (ICD-10: O15)                                                                            | groupO15 |
| Unspecified maternal hypertension (ICD-10: O16)                                                    | groupO16 |
| Haemorrhage in early pregnancy (ICD-10: O20)                                                       | groupO20 |
| Excessive vomiting in pregnancy (ICD-10: O21)                                                      | groupO21 |
| Venous complications in pregnancy (ICD-10: O22)                                                    | groupO22 |
| Infections of genitourinary tract in pregnancy (ICD-10: O23)                                       | groupO23 |
| Diabetes mellitus in pregnancy (ICD-10: O24)                                                       | groupO24 |
| Malnutrition in pregnancy (ICD-10: O25)                                                            | groupO25 |
| Maternal care for other conditions predominantly related to pregnancy (ICD-10: O26)                | groupO26 |
| Complications of anaesthesia during pregnancy (ICD-10: O29)                                        | groupO29 |
| Multiple gestation (ICD-10: O30)                                                                   | groupO30 |
| Complications specific to multiple gestation (ICD-10: O31)                                         | groupO31 |
| Maternal care for known or suspected malpresentation of fetus (ICD-10: O32)                        | groupO32 |
| Maternal care for known or suspected disproportion (ICD-10: O33)                                   | groupO33 |
| Maternal care for known or suspected abnormality of pelvic organs (ICD-10: O34)                    | groupO34 |
| Maternal care for known or suspected fetal abnormality and damage (ICD-10: O35)                    | groupO35 |
| Maternal care for other known or suspected fetal problems (ICD-10: O36)                            | groupO36 |
| Polyhydramnios (ICD-10: O40)                                                                       | groupO40 |
| Other disorders of amniotic fluid and membranes (ICD-10: O41)                                      | groupO41 |
| Premature rupture of membranes (ICD-10: O42)                                                       | groupO42 |
| Placental disorders (ICD-10: O43)                                                                  | groupO43 |
| Placenta praevia (ICD-10: O44)                                                                     | groupO44 |
| Premature separation of placenta [abruptio placentae] (ICD-10: O45)                                | groupO45 |
| Antepartum haemorrhage, not elsewhere classified (ICD-10: O46)                                     | groupO46 |
| False labour (ICD-10: O47)                                                                         | groupO47 |
| Prolonged pregnancy (ICD-10: O48)                                                                  | groupO48 |
| Preterm labour and delivery (ICD-10: O60)                                                          | groupO60 |
| Failed induction of labour (ICD-10: O61)                                                           | groupO61 |
| Abnormalities of forces of labour (ICD-10: O62)                                                    | groupO62 |
| Long labour (ICD-10: O63)                                                                          | groupO63 |
| Obstructed labour due to malposition and malpresentation of fetus (ICD-10: O64)                    | groupO64 |
| Obstructed labour due to maternal pelvic abnormality (ICD-10: O65)                                 | groupO65 |
| Other obstructed labour (ICD-10: O66)                                                              | groupO66 |
| Labour and delivery complicated by intrapartum haemorrhage, not elsewhere classified (ICD-10: O67) | groupO67 |
| Labour and delivery complicated by fetal stress [distress] (ICD-10: O68)                           | groupO68 |

|                                                                                                                             |          |
|-----------------------------------------------------------------------------------------------------------------------------|----------|
| Labour and delivery complicated by umbilical cord complications (ICD-10: O69)                                               | groupO69 |
| Perineal laceration during delivery (ICD-10: O70)                                                                           | groupO70 |
| Other obstetric trauma (ICD-10: O71)                                                                                        | groupO71 |
| Postpartum haemorrhage (ICD-10: O72)                                                                                        | groupO72 |
| Retained placenta and membranes, without haemorrhage (ICD-10: O73)                                                          | groupO73 |
| Complications of anaesthesia during labour and delivery (ICD-10: O74)                                                       | groupO74 |
| Other complications of labour and delivery, not elsewhere classified (ICD-10: O75)                                          | groupO75 |
| Single spontaneous delivery (ICD-10: O80)                                                                                   | groupO80 |
| Single delivery by forceps and vacuum extractor (ICD-10: O81)                                                               | groupO81 |
| Single delivery by caesarean section (ICD-10: O82)                                                                          | groupO82 |
| Other assisted single delivery (ICD-10: O83)                                                                                | groupO83 |
| Multiple delivery (ICD-10: O84)                                                                                             | groupO84 |
| Puerperal sepsis (ICD-10: O85)                                                                                              | groupO85 |
| Other puerperal infections (ICD-10: O86)                                                                                    | groupO86 |
| Obstetric embolism (ICD-10: O88)                                                                                            | groupO88 |
| Complications of anaesthesia during the puerperium (ICD-10: O89)                                                            | groupO89 |
| Complications of the puerperium, not elsewhere classified (ICD-10: O90)                                                     | groupO90 |
| Infections of breast associated with childbirth (ICD-10: O91)                                                               | groupO91 |
| Other disorders of breast and lactation associated with childbirth (ICD-10: O92)                                            | groupO92 |
| Sequelae of complication of pregnancy, childbirth and the puerperium (ICD-10: O94)                                          | groupO94 |
| Maternal infectious and parasitic diseases classifiable elsewhere but complicating pregnancy, childbirth and the puerperium | groupO98 |
| Fetus and newborn affected by other complications of labour and delivery (ICD-10: P03)                                      | groupP03 |
| Slow fetal growth and fetal malnutrition (ICD-10: P05)                                                                      | groupP05 |
| Disorders related to short gestation and low birth weight, not elsewhere classified (ICD-10: P07)                           | groupP07 |
| Birth injury to peripheral nervous system (ICD-10: P14)                                                                     | groupP14 |
| Other birth injuries (ICD-10: P15)                                                                                          | groupP15 |
| Intrauterine hypoxia (ICD-10: P20)                                                                                          | groupP20 |
| Congenital pneumonia (ICD-10: P23)                                                                                          | groupP23 |
| Interstitial emphysema and related conditions originating in the perinatal period (ICD-10: P25)                             | groupP25 |
| Other respiratory conditions originating in the perinatal period (ICD-10: P28)                                              | groupP28 |
| Congenital viral diseases (ICD-10: P35)                                                                                     | groupP35 |
| Bacterial sepsis of newborn (ICD-10: P36)                                                                                   | groupP36 |
| Other congenital infectious and parasitic diseases (ICD-10: P37)                                                            | groupP37 |
| Neonatal jaundice from other and unspecified causes (ICD-10: P59)                                                           | groupP59 |
| Other perinatal haematological disorders (ICD-10: P61)                                                                      | groupP61 |
| Other conditions of integument specific to fetus and newborn (ICD-10: P83)                                                  | groupP83 |
| Feeding problems of newborn (ICD-10: P92)                                                                                   | groupP92 |
| Encephalocele (ICD-10: Q01)                                                                                                 | groupQ01 |
| Microcephaly (ICD-10: Q02)                                                                                                  | groupQ02 |
| Congenital hydrocephalus (ICD-10: Q03)                                                                                      | groupQ03 |
| Other congenital malformations of brain (ICD-10: Q04)                                                                       | groupQ04 |
| Spina bifida (ICD-10: Q05)                                                                                                  | groupQ05 |
| Other congenital malformations of spinal cord (ICD-10: Q06)                                                                 | groupQ06 |
| Other congenital malformations of nervous system (ICD-10: Q07)                                                              | groupQ07 |
| Congenital malformations of eyelid, lacrimal apparatus and orbit (ICD-10: Q10)                                              | groupQ10 |
| Anophthalmos, microphthalmos and macrophthalmos (ICD-10: Q11)                                                               | groupQ11 |
| Congenital lens malformations (ICD-10: Q12)                                                                                 | groupQ12 |
| Congenital malformations of anterior segment of eye (ICD-10: Q13)                                                           | groupQ13 |
| Congenital malformations of posterior segment of eye (ICD-10: Q14)                                                          | groupQ14 |
| Other congenital malformations of eye (ICD-10: Q15)                                                                         | groupQ15 |
| Congenital malformations of ear causing impairment of hearing (ICD-10: Q16)                                                 | groupQ16 |
| Other congenital malformations of face and neck (ICD-10: Q18)                                                               | groupQ18 |
| Congenital malformations of cardiac chambers and connections (ICD-10: Q20)                                                  | groupQ20 |
| Congenital malformations of pulmonary and tricuspid valves (ICD-10: Q22)                                                    | groupQ22 |
| Congenital malformations of aortic and mitral valves (ICD-10: Q23)                                                          | groupQ23 |
| Other congenital malformations of heart (ICD-10: Q24)                                                                       | groupQ24 |
| Congenital malformations of great arteries (ICD-10: Q25)                                                                    | groupQ25 |
| Congenital malformations of great veins (ICD-10: Q26)                                                                       | groupQ26 |
| Other congenital malformations of peripheral vascular system (ICD-10: Q27)                                                  | groupQ27 |
| Other congenital malformations of circulatory system (ICD-10: Q28)                                                          | groupQ28 |
| Congenital malformations of nose (ICD-10: Q30)                                                                              | groupQ30 |
| Congenital malformations of larynx (ICD-10: Q31)                                                                            | groupQ31 |
| Congenital malformations of lung (ICD-10: Q33)                                                                              | groupQ33 |
| Other congenital malformations of respiratory system (ICD-10: Q34)                                                          | groupQ34 |
| Cleft palate (ICD-10: Q35)                                                                                                  | groupQ35 |
| Cleft lip (ICD-10: Q36)                                                                                                     | groupQ36 |
| Cleft palate with cleft lip (ICD-10: Q37)                                                                                   | groupQ37 |
| Other congenital malformations of tongue, mouth and pharynx (ICD-10: Q38)                                                   | groupQ38 |
| Congenital malformations of oesophagus (ICD-10: Q39)                                                                        | groupQ39 |
| Other congenital malformations of upper alimentary tract (ICD-10: Q40)                                                      | groupQ40 |
| Congenital absence, atresia and stenosis of small intestine (ICD-10: Q41)                                                   | groupQ41 |
| Congenital absence, atresia and stenosis of large intestine (ICD-10: Q42)                                                   | groupQ42 |
| Other congenital malformations of intestine (ICD-10: Q43)                                                                   | groupQ43 |
| Congenital malformations of gallbladder, bile ducts and liver (ICD-10: Q44)                                                 | groupQ44 |
| Other congenital malformations of digestive system (ICD-10: Q45)                                                            | groupQ45 |
| Congenital malformations of ovaries, fallopian tubes and broad ligaments (ICD-10: Q50)                                      | groupQ50 |
| Congenital malformations of uterus and cervix (ICD-10: Q51)                                                                 | groupQ51 |

|                                                                                                         |          |
|---------------------------------------------------------------------------------------------------------|----------|
| Other congenital malformations of female genitalia (ICD-10: Q52)                                        | groupQ52 |
| Undescended testicle (ICD-10: Q53)                                                                      | groupQ53 |
| Other congenital malformations of male genital organs (ICD-10: Q55)                                     | groupQ55 |
| Indeterminate sex and pseudohermaphroditism (ICD-10: Q56)                                               | groupQ56 |
| Renal agenesis and other reduction defects of kidney (ICD-10: Q60)                                      | groupQ60 |
| Cystic kidney disease (ICD-10: Q61)                                                                     | groupQ61 |
| Congenital obstructive defects of renal pelvis and congenital malformations of ureter (ICD-10: Q62)     | groupQ62 |
| Other congenital malformations of kidney (ICD-10: Q63)                                                  | groupQ63 |
| Other congenital malformations of urinary system (ICD-10: Q64)                                          | groupQ64 |
| Congenital deformities of hip (ICD-10: Q65)                                                             | groupQ65 |
| Congenital deformities of feet (ICD-10: Q66)                                                            | groupQ66 |
| Congenital musculoskeletal deformities of head, face, spine and chest (ICD-10: Q67)                     | groupQ67 |
| Other congenital musculoskeletal deformities (ICD-10: Q68)                                              | groupQ68 |
| Polydactyly (ICD-10: Q69)                                                                               | groupQ69 |
| Syndactyly (ICD-10: Q70)                                                                                | groupQ70 |
| Reduction defects of upper limb (ICD-10: Q71)                                                           | groupQ71 |
| Reduction defects of lower limb (ICD-10: Q72)                                                           | groupQ72 |
| Reduction defects of unspecified limb (ICD-10: Q73)                                                     | groupQ73 |
| Other congenital malformations of limb(s) (ICD-10: Q74)                                                 | groupQ74 |
| Other congenital malformations of skull and face bones (ICD-10: Q75)                                    | groupQ75 |
| Congenital malformations of spine and bony thorax (ICD-10: Q76)                                         | groupQ76 |
| Osteochondrodysplasia with defects of growth of tubular bones and spine (ICD-10: Q77)                   | groupQ77 |
| Other osteochondrodysplasias (ICD-10: Q78)                                                              | groupQ78 |
| Congenital malformations of the musculoskeletal system, not elsewhere classified (ICD-10: Q79)          | groupQ79 |
| Congenital ichthyosis (ICD-10: Q80)                                                                     | groupQ80 |
| Epidermolysis bullosa (ICD-10: Q81)                                                                     | groupQ81 |
| Other congenital malformations of skin (ICD-10: Q82)                                                    | groupQ82 |
| Congenital malformations of breast (ICD-10: Q83)                                                        | groupQ83 |
| Other congenital malformations of integument (ICD-10: Q84)                                              | groupQ84 |
| Phakomatoses, not elsewhere classified (ICD-10: Q85)                                                    | groupQ85 |
| Congenital malformation syndromes due to known exogenous causes, not elsewhere classified (ICD-10: Q86) | groupQ86 |
| Other specified congenital malformation syndromes affecting multiple systems (ICD-10: Q87)              | groupQ87 |
| Other congenital malformations, not elsewhere classified (ICD-10: Q89)                                  | groupQ89 |
| Down syndrome (ICD-10: Q90)                                                                             | groupQ90 |
| Edwards syndrome and Patau syndrome (ICD-10: Q91)                                                       | groupQ91 |
| Other trisomies and partial trisomies of the autosomes, not elsewhere classified (ICD-10: Q92)          | groupQ92 |
| Monosomies and deletions from the autosomes, not elsewhere classified (ICD-10: Q93)                     | groupQ93 |
| Turner syndrome (ICD-10: Q96)                                                                           | groupQ96 |
| Other sex chromosome abnormalities, female phenotype, not elsewhere classified (ICD-10: Q97)            | groupQ97 |
| Other sex chromosome abnormalities, male phenotype, not elsewhere classified (ICD-10: Q98)              | groupQ98 |
| Other chromosome abnormalities, not elsewhere classified (ICD-10: Q99)                                  | groupQ99 |
| Abnormalities of heart beat (ICD-10: R00)                                                               | groupR00 |
| Gangrene, not elsewhere classified (ICD-10: R02)                                                        | groupR02 |
| Abnormal blood-pressure reading, without diagnosis (ICD-10: R03)                                        | groupR03 |
| Haemorrhage from respiratory passages (ICD-10: R04)                                                     | groupR04 |
| Abnormalities of breathing (ICD-10: R06)                                                                | groupR06 |
| Pain in throat and chest (ICD-10: R07)                                                                  | groupR07 |
| Other symptoms and signs involving the circulatory and respiratory systems (ICD-10: R09)                | groupR09 |
| Abdominal and pelvic pain (ICD-10: R10)                                                                 | groupR10 |
| Nausea and vomiting (ICD-10: R11)                                                                       | groupR11 |
| Heartburn (ICD-10: R12)                                                                                 | groupR12 |
| Dysphagia (ICD-10: R13)                                                                                 | groupR13 |
| Flatulence and related conditions (ICD-10: R14)                                                         | groupR14 |
| Faecal incontinence (ICD-10: R15)                                                                       | groupR15 |
| Hepatomegaly and splenomegaly, not elsewhere classified (ICD-10: R16)                                   | groupR16 |
| Unspecified jaundice (ICD-10: R17)                                                                      | groupR17 |
| Ascites (ICD-10: R18)                                                                                   | groupR18 |
| Other symptoms and signs involving the digestive system and abdomen (ICD-10: R19)                       | groupR19 |
| Disturbances of skin sensation (ICD-10: R20)                                                            | groupR20 |
| Localized swelling, mass and lump of skin and subcutaneous tissue (ICD-10: R22)                         | groupR22 |
| Other skin changes (ICD-10: R23)                                                                        | groupR23 |
| Abnormalities of gait and mobility (ICD-10: R26)                                                        | groupR26 |
| Other lack of coordination (ICD-10: R27)                                                                | groupR27 |
| Other symptoms and signs involving the nervous and musculoskeletal systems (ICD-10: R29)                | groupR29 |
| Pain associated with micturition (ICD-10: R30)                                                          | groupR30 |
| Unspecified haematuria (ICD-10: R31)                                                                    | groupR31 |
| Unspecified urinary incontinence (ICD-10: R32)                                                          | groupR32 |
| Retention of urine (ICD-10: R33)                                                                        | groupR33 |
| Anuria and oliguria (ICD-10: R34)                                                                       | groupR34 |
| Polyuria (ICD-10: R35)                                                                                  | groupR35 |
| Urethral discharge (ICD-10: R36)                                                                        | groupR36 |
| Other symptoms and signs involving the urinary system (ICD-10: R39)                                     | groupR39 |
| Somnolence, stupor and coma (ICD-10: R40)                                                               | groupR40 |
| Other symptoms and signs involving cognitive functions and awareness (ICD-10: R41)                      | groupR41 |
| Dizziness and giddiness (ICD-10: R42)                                                                   | groupR42 |
| Disturbances of smell and taste (ICD-10: R43)                                                           | groupR43 |
| Other symptoms and signs involving general sensations and perceptions (ICD-10: R44)                     | groupR44 |

|                                                                                                 |          |
|-------------------------------------------------------------------------------------------------|----------|
| Symptoms and signs involving emotional state (ICD-10: R45)                                      | groupR45 |
| Symptoms and signs involving appearance and behaviour (ICD-10: R46)                             | groupR46 |
| Speech disturbances, not elsewhere classified (ICD-10: R47)                                     | groupR47 |
| Dyslexia and other symbolic dysfunctions, not elsewhere classified (ICD-10: R48)                | groupR48 |
| Voice disturbances (ICD-10: R49)                                                                | groupR49 |
| Fever of other and unknown origin (ICD-10: R50)                                                 | groupR50 |
| Headache (ICD-10: R51)                                                                          | groupR51 |
| Pain, not elsewhere classified (ICD-10: R52)                                                    | groupR52 |
| Malaise and fatigue (ICD-10: R53)                                                               | groupR53 |
| Senility (ICD-10: R54)                                                                          | groupR54 |
| Syncope and collapse (ICD-10: R55)                                                              | groupR55 |
| Convulsions, not elsewhere classified (ICD-10: R56)                                             | groupR56 |
| Shock, not elsewhere classified (ICD-10: R57)                                                   | groupR57 |
| Haemorrhage, not elsewhere classified (ICD-10: R58)                                             | groupR58 |
| Enlarged lymph nodes (ICD-10: R59)                                                              | groupR59 |
| Oedema, not elsewhere classified (ICD-10: R60)                                                  | groupR60 |
| Hyperhidrosis (ICD-10: R61)                                                                     | groupR61 |
| Lack of expected normal physiological development (ICD-10: R62)                                 | groupR62 |
| Cachexia (ICD-10: R64)                                                                          | groupR64 |
| Systemic Inflammatory Response Syndrome [SIRS] (ICD-10: R65)                                    | groupR65 |
| Other general symptoms and signs (ICD-10: R68)                                                  | groupR68 |
| Unknown and unspecified causes of morbidity (ICD-10: R69)                                       | groupR69 |
| Elevated erythrocyte sedimentation rate and abnormality of plasma viscosity (ICD-10: R70)       | groupR70 |
| Abnormality of red blood cells (ICD-10: R71)                                                    | groupR71 |
| Abnormality of white blood cells, not elsewhere classified (ICD-10: R72)                        | groupR72 |
| Elevated blood glucose level (ICD-10: R73)                                                      | groupR73 |
| Other abnormal immunological findings in serum (ICD-10: R76)                                    | groupR76 |
| Other abnormalities of plasma proteins (ICD-10: R77)                                            | groupR77 |
| Findings of drugs and other substances, not normally found in blood (ICD-10: R78)               | groupR78 |
| Other abnormal findings of blood chemistry (ICD-10: R79)                                        | groupR79 |
| Isolated proteinuria (ICD-10: R80)                                                              | groupR80 |
| Glycosuria (ICD-10: R81)                                                                        | groupR81 |
| Other abnormal findings in urine (ICD-10: R82)                                                  | groupR82 |
| Abnormal findings in cerebrospinal fluid (ICD-10: R83)                                          | groupR83 |
| Abnormal findings in specimens from respiratory organs and thorax (ICD-10: R84)                 | groupR84 |
| Abnormal findings in specimens from digestive organs and abdominal cavity (ICD-10: R85)         | groupR85 |
| Abnormal findings in specimens from male genital organs (ICD-10: R86)                           | groupR86 |
| Abnormal findings in specimens from female genital organs (ICD-10: R87)                         | groupR87 |
| Abnormal findings in specimens from other organs, systems and tissues (ICD-10: R89)             | groupR89 |
| Abnormal findings on diagnostic imaging of central nervous system (ICD-10: R90)                 | groupR90 |
| Abnormal findings on diagnostic imaging of lung (ICD-10: R91)                                   | groupR91 |
| Abnormal findings on diagnostic imaging of breast (ICD-10: R92)                                 | groupR92 |
| Abnormal findings on diagnostic imaging of other body structures (ICD-10: R93)                  | groupR93 |
| Abnormal results of function studies (ICD-10: R94)                                              | groupR94 |
| Other sudden death, cause unknown (ICD-10: R96)                                                 | groupR96 |
| Other ill-defined and unspecified causes of mortality (ICD-10: R99)                             | groupR99 |
| Superficial injury of head (ICD-10: S00)                                                        | groupS00 |
| Open wound of head (ICD-10: S01)                                                                | groupS01 |
| Fracture of skull and facial bones (ICD-10: S02)                                                | groupS02 |
| Dislocation, sprain and strain of joints and ligaments of head (ICD-10: S03)                    | groupS03 |
| Injury of cranial nerves (ICD-10: S04)                                                          | groupS04 |
| Injury of eye and orbit (ICD-10: S05)                                                           | groupS05 |
| Intracranial injury (ICD-10: S06)                                                               | groupS06 |
| Crushing injury of head (ICD-10: S07)                                                           | groupS07 |
| Traumatic amputation of part of head (ICD-10: S08)                                              | groupS08 |
| Superficial injury of neck (ICD-10: S10)                                                        | groupS10 |
| Open wound of neck (ICD-10: S11)                                                                | groupS11 |
| Fracture of neck (ICD-10: S12)                                                                  | groupS12 |
| Dislocation, sprain and strain of joints and ligaments at neck level (ICD-10: S13)              | groupS13 |
| Injury of nerves and spinal cord at neck level (ICD-10: S14)                                    | groupS14 |
| Injury of blood vessels at neck level (ICD-10: S15)                                             | groupS15 |
| Injury of muscle and tendon at neck level (ICD-10: S16)                                         | groupS16 |
| Other and unspecified injuries of neck (ICD-10: S19)                                            | groupS19 |
| Superficial injury of thorax (ICD-10: S20)                                                      | groupS20 |
| Open wound of thorax (ICD-10: S21)                                                              | groupS21 |
| Dislocation, sprain and strain of joints and ligaments of thorax (ICD-10: S23)                  | groupS23 |
| Injury of nerves and spinal cord at thorax level (ICD-10: S24)                                  | groupS24 |
| Injury of blood vessels of thorax (ICD-10: S25)                                                 | groupS25 |
| Injury of heart (ICD-10: S26)                                                                   | groupS26 |
| Injury of other and unspecified intrathoracic organs (ICD-10: S27)                              | groupS27 |
| Crushing injury of thorax and traumatic amputation of part of thorax (ICD-10: S28)              | groupS28 |
| Superficial injury of abdomen, lower back and pelvis (ICD-10: S30)                              | groupS30 |
| Fracture of lumbar spine and pelvis (ICD-10: S32)                                               | groupS32 |
| Dislocation, sprain and strain of joints and ligaments of lumbar spine and pelvis (ICD-10: S33) | groupS33 |
| Injury of nerves and lumbar spinal cord at abdomen, lower back and pelvis level (ICD-10: S34)   | groupS34 |
| Injury of blood vessels at abdomen, lower back and pelvis level (ICD-10: S35)                   | groupS35 |
| Injury of intra-abdominal organs (ICD-10: S36)                                                  | groupS36 |

|                                                                                                  |          |
|--------------------------------------------------------------------------------------------------|----------|
| Injury of urinary and pelvic organs (ICD-10: S37)                                                | groupS37 |
| Crushing injury and traumatic amputation of part of abdomen, lower back and pelvis (ICD-10: S38) | groupS38 |
| Other and unspecified injuries of abdomen, lower back and pelvis (ICD-10: S39)                   | groupS39 |
| Superficial injury of shoulder and upper arm (ICD-10: S40)                                       | groupS40 |
| Open wound of shoulder and upper arm (ICD-10: S41)                                               | groupS41 |
| Fracture of shoulder and upper arm (ICD-10: S42)                                                 | groupS42 |
| Dislocation, sprain and strain of joints and ligaments of shoulder girdle (ICD-10: S43)          | groupS43 |
| Injury of nerves at shoulder and upper arm level (ICD-10: S44)                                   | groupS44 |
| Injury of blood vessels at shoulder and upper arm level (ICD-10: S45)                            | groupS45 |
| Injury of muscle and tendon at shoulder and upper arm level (ICD-10: S46)                        | groupS46 |
| Crushing injury of shoulder and upper arm (ICD-10: S47)                                          | groupS47 |
| Traumatic amputation of shoulder and upper arm (ICD-10: S48)                                     | groupS48 |
| Other and unspecified injuries of shoulder and upper arm (ICD-10: S49)                           | groupS49 |
| Superficial injury of forearm (ICD-10: S50)                                                      | groupS50 |
| Open wound of forearm (ICD-10: S51)                                                              | groupS51 |
| Fracture of forearm (ICD-10: S52)                                                                | groupS52 |
| Dislocation, sprain and strain of joints and ligaments of elbow (ICD-10: S53)                    | groupS53 |
| Injury of nerves at forearm level (ICD-10: S54)                                                  | groupS54 |
| Injury of blood vessels at forearm level (ICD-10: S55)                                           | groupS55 |
| Injury of muscle and tendon at forearm level (ICD-10: S56)                                       | groupS56 |
| Crushing injury of forearm (ICD-10: S57)                                                         | groupS57 |
| Traumatic amputation of forearm (ICD-10: S58)                                                    | groupS58 |
| Other and unspecified injuries of forearm (ICD-10: S59)                                          | groupS59 |
| Superficial injury of wrist and hand (ICD-10: S60)                                               | groupS60 |
| Open wound of wrist and hand (ICD-10: S61)                                                       | groupS61 |
| Fracture at wrist and hand level (ICD-10: S62)                                                   | groupS62 |
| Dislocation, sprain and strain of joints and ligaments at wrist and hand level (ICD-10: S63)     | groupS63 |
| Injury of nerves at wrist and hand level (ICD-10: S64)                                           | groupS64 |
| Injury of blood vessels at wrist and hand level (ICD-10: S65)                                    | groupS65 |
| Injury of muscle and tendon at wrist and hand level (ICD-10: S66)                                | groupS66 |
| Crushing injury of wrist and hand (ICD-10: S67)                                                  | groupS67 |
| Traumatic amputation of wrist and hand (ICD-10: S68)                                             | groupS68 |
| Superficial injury of hip and thigh (ICD-10: S70)                                                | groupS70 |
| Open wound of hip and thigh (ICD-10: S71)                                                        | groupS71 |
| Fracture of femur (ICD-10: S72)                                                                  | groupS72 |
| Dislocation, sprain and strain of joint and ligaments of hip (ICD-10: S73)                       | groupS73 |
| Injury of nerves at hip and thigh level (ICD-10: S74)                                            | groupS74 |
| Injury of blood vessels at hip and thigh level (ICD-10: S75)                                     | groupS75 |
| Injury of muscle and tendon at hip and thigh level (ICD-10: S76)                                 | groupS76 |
| Other and specified injuries of hip and thigh (ICD-10: S79)                                      | groupS79 |
| Superficial injury of lower leg (ICD-10: S80)                                                    | groupS80 |
| Open wound of lower leg (ICD-10: S81)                                                            | groupS81 |
| Fracture of lower leg, including ankle (ICD-10: S82)                                             | groupS82 |
| Dislocation, sprain and strain of joints and ligaments of knee (ICD-10: S83)                     | groupS83 |
| Injury of nerves at lower leg level (ICD-10: S84)                                                | groupS84 |
| Injury of blood vessels at lower leg level (ICD-10: S85)                                         | groupS85 |
| Injury of muscle and tendon at lower leg level (ICD-10: S86)                                     | groupS86 |
| Crushing injury of lower leg (ICD-10: S87)                                                       | groupS87 |
| Traumatic amputation of lower leg (ICD-10: S88)                                                  | groupS88 |
| Other and unspecified injuries of lower leg (ICD-10: S89)                                        | groupS89 |
| Superficial injury of ankle and foot (ICD-10: S90)                                               | groupS90 |
| Open wound of ankle and foot (ICD-10: S91)                                                       | groupS91 |
| Fracture of foot, except ankle (ICD-10: S92)                                                     | groupS92 |
| Injury of nerves at ankle and foot level (ICD-10: S94)                                           | groupS94 |
| Injury of blood vessels at ankle and foot level (ICD-10: S95)                                    | groupS95 |
| Injury of muscle and tendon at ankle and foot level (ICD-10: S96)                                | groupS96 |
| Crushing injury of ankle and foot (ICD-10: S97)                                                  | groupS97 |
| Traumatic amputation of ankle and foot (ICD-10: S98)                                             | groupS98 |
| Other and unspecified injuries of ankle and foot (ICD-10: S99)                                   | groupS99 |
| Superficial injuries involving multiple body regions (ICD-10: T00)                               | groupT00 |
| Open wounds involving multiple body regions (ICD-10: T01)                                        | groupT01 |
| Fractures involving multiple body regions (ICD-10: T02)                                          | groupT02 |
| Dislocations, sprains and strains involving multiple body regions (ICD-10: T03)                  | groupT03 |
| Crushing injuries involving multiple body regions (ICD-10: T04)                                  | groupT04 |
| Traumatic amputations involving multiple body regions (ICD-10: T05)                              | groupT05 |
| Other injuries involving multiple body regions, not elsewhere classified (ICD-10: T06)           | groupT06 |
| Unspecified multiple injuries (ICD-10: T07)                                                      | groupT07 |
| Fracture of spine, level unspecified (ICD-10: T08)                                               | groupT08 |
| Other injuries of spine and trunk, level unspecified (ICD-10: T09)                               | groupT09 |
| Fracture of upper limb, level unspecified (ICD-10: T10)                                          | groupT10 |
| Other injuries of upper limb, level unspecified (ICD-10: T11)                                    | groupT11 |
| Fracture of lower limb, level unspecified (ICD-10: T12)                                          | groupT12 |
| Other injuries of lower limb, level unspecified (ICD-10: T13)                                    | groupT13 |
| Foreign body on external eye (ICD-10: T15)                                                       | groupT15 |
| Foreign body in ear (ICD-10: T16)                                                                | groupT16 |
| Foreign body in respiratory tract (ICD-10: T17)                                                  | groupT17 |
| Foreign body in genitourinary tract (ICD-10: T19)                                                | groupT19 |

|                                                                                                                                                            |          |
|------------------------------------------------------------------------------------------------------------------------------------------------------------|----------|
| Burn and corrosion of head and neck (ICD-10: T20)                                                                                                          | groupT20 |
| Burn and corrosion of trunk (ICD-10: T21)                                                                                                                  | groupT21 |
| Burn and corrosion of shoulder and upper limb, except wrist and hand (ICD-10: T22)                                                                         | groupT22 |
| Burn and corrosion of wrist and hand (ICD-10: T23)                                                                                                         | groupT23 |
| Burn and corrosion of hip and lower limb, except ankle and foot (ICD-10: T24)                                                                              | groupT24 |
| Burn and corrosion of ankle and foot (ICD-10: T25)                                                                                                         | groupT25 |
| Burn and corrosion confined to eye and adnexa (ICD-10: T26)                                                                                                | groupT26 |
| Burn and corrosion of respiratory tract (ICD-10: T27)                                                                                                      | groupT27 |
| Burn and corrosion of other internal organs (ICD-10: T28)                                                                                                  | groupT28 |
| Burns and corrosions of multiple body regions (ICD-10: T29)                                                                                                | groupT29 |
| Burn and corrosion, body region unspecified (ICD-10: T30)                                                                                                  | groupT30 |
| Burns classified according to extent of body surface involved (ICD-10: T31)                                                                                | groupT31 |
| Corrosions classified according to extent of body surface involved (ICD-10: T32)                                                                           | groupT32 |
| Superficial frostbite (ICD-10: T33)                                                                                                                        | groupT33 |
| Frostbite with tissue necrosis (ICD-10: T34)                                                                                                               | groupT34 |
| Frostbite involving multiple body regions and unspecified frostbite (ICD-10: T35)                                                                          | groupT35 |
| Poisoning by systemic antibiotics (ICD-10: T36)                                                                                                            | groupT36 |
| Poisoning by other systemic anti-infectives and antiparasitics (ICD-10: T37)                                                                               | groupT37 |
| Poisoning by hormones and their synthetic substitutes and antagonists, not elsewhere classified (ICD-10: T38)                                              | groupT38 |
| Poisoning by nonopioid analgesics, antipyretics and antirheumatics (ICD-10: T39)                                                                           | groupT39 |
| Poisoning by narcotics and psychodysleptics [hallucinogens] (ICD-10: T40)                                                                                  | groupT40 |
| Poisoning by anaesthetics and therapeutic gases (ICD-10: T41)                                                                                              | groupT41 |
| Poisoning by antiepileptic, sedative-hypnotic and antiparkinsonism drugs (ICD-10: T42)                                                                     | groupT42 |
| Poisoning by psychotropic drugs, not elsewhere classified (ICD-10: T43)                                                                                    | groupT43 |
| Poisoning by drugs primarily affecting the autonomic nervous system (ICD-10: T44)                                                                          | groupT44 |
| Poisoning by primarily systemic and haematological agents, not elsewhere classified (ICD-10: T45)                                                          | groupT45 |
| Poisoning by agents primarily affecting the cardiovascular system (ICD-10: T46)                                                                            | groupT46 |
| Poisoning by agents primarily affecting the gastrointestinal system (ICD-10: T47)                                                                          | groupT47 |
| Poisoning by agents primarily acting on smooth and skeletal muscles and the respiratory system (ICD-10: T48)                                               | groupT48 |
| Poisoning by topical agents primarily affecting skin and mucous membrane and by ophthalmological, otorhinolaryngological and ototoxic agents (ICD-10: T49) | groupT49 |
| Poisoning by diuretics and other and unspecified drugs, medicaments and biological substances (ICD-10: T50)                                                | groupT50 |
| Toxic effect of alcohol (ICD-10: T51)                                                                                                                      | groupT51 |
| Toxic effect of organic solvents (ICD-10: T52)                                                                                                             | groupT52 |
| Toxic effect of halogen derivatives of aliphatic and aromatic hydrocarbons (ICD-10: T53)                                                                   | groupT53 |
| Toxic effect of corrosive substances (ICD-10: T54)                                                                                                         | groupT54 |
| Toxic effect of soaps and detergents (ICD-10: T55)                                                                                                         | groupT55 |
| Toxic effect of metals (ICD-10: T56)                                                                                                                       | groupT56 |
| Toxic effect of other inorganic substances (ICD-10: T57)                                                                                                   | groupT57 |
| Toxic effect of carbon monoxide (ICD-10: T58)                                                                                                              | groupT58 |
| Toxic effect of other gases, fumes and vapours (ICD-10: T59)                                                                                               | groupT59 |
| Toxic effect of pesticides (ICD-10: T60)                                                                                                                   | groupT60 |
| Toxic effect of noxious substances eaten as seafood (ICD-10: T61)                                                                                          | groupT61 |
| Toxic effect of other noxious substances eaten as food (ICD-10: T62)                                                                                       | groupT62 |
| Toxic effect of contact with venomous animals (ICD-10: T63)                                                                                                | groupT63 |
| Toxic effect of other and unspecified substances (ICD-10: T65)                                                                                             | groupT65 |
| Unspecified effects of radiation (ICD-10: T66)                                                                                                             | groupT66 |
| Effects of heat and light (ICD-10: T67)                                                                                                                    | groupT67 |
| Hypothermia (ICD-10: T68)                                                                                                                                  | groupT68 |
| Other effects of reduced temperature (ICD-10: T69)                                                                                                         | groupT69 |
| Effects of air pressure and water pressure (ICD-10: T70)                                                                                                   | groupT70 |
| Asphyxiation (ICD-10: T71)                                                                                                                                 | groupT71 |
| Effects of other deprivation (ICD-10: T73)                                                                                                                 | groupT73 |
| Maltreatment syndromes (ICD-10: T74)                                                                                                                       | groupT74 |
| Effects of other external causes (ICD-10: T75)                                                                                                             | groupT75 |
| Adverse effects, not elsewhere classified (ICD-10: T78)                                                                                                    | groupT78 |
| Certain early complications of trauma, not elsewhere classified (ICD-10: T79)                                                                              | groupT79 |
| Complications following infusion, transfusion and therapeutic injection (ICD-10: T80)                                                                      | groupT80 |
| Complications of cardiac and vascular prosthetic devices, implants and grafts (ICD-10: T82)                                                                | groupT82 |
| Complications of genitourinary prosthetic devices, implants and grafts (ICD-10: T83)                                                                       | groupT83 |
| Complications of internal orthopaedic prosthetic devices, implants and grafts (ICD-10: T84)                                                                | groupT84 |
| Complications of other internal prosthetic devices, implants and grafts (ICD-10: T85)                                                                      | groupT85 |
| Failure and rejection of transplanted organs and tissues (ICD-10: T86)                                                                                     | groupT86 |
| Complications peculiar to reattachment and amputation (ICD-10: T87)                                                                                        | groupT87 |
| Other complications of surgical and medical care, not elsewhere classified (ICD-10: T88)                                                                   | groupT88 |
| Sequelae of injuries of head (ICD-10: T90)                                                                                                                 | groupT90 |
| Sequelae of injuries of neck and trunk (ICD-10: T91)                                                                                                       | groupT91 |
| Sequelae of injuries of upper limb (ICD-10: T92)                                                                                                           | groupT92 |
| Sequelae of injuries of lower limb (ICD-10: T93)                                                                                                           | groupT93 |
| Sequelae of injuries involving multiple and unspecified body regions (ICD-10: T94)                                                                         | groupT94 |
| Sequelae of burns, corrosions and frostbite (ICD-10: T95)                                                                                                  | groupT95 |
| Sequelae of poisoning by drugs, medicaments and biological substances (ICD-10: T96)                                                                        | groupT96 |
| Sequelae of toxic effects of substances chiefly nonmedicinal as to source (ICD-10: T97)                                                                    | groupT97 |
| Sequelae of other and unspecified effects of external causes (ICD-10: T98)                                                                                 | groupT98 |
| Pedestrian injured in collision with pedal cycle (ICD-10: V01)                                                                                             | groupV01 |
| Pedestrian injured in collision with two- or three-wheeled motor vehicle (ICD-10: V02)                                                                     | groupV02 |
| Pedestrian injured in collision with car, pick-up truck or van (ICD-10: V03)                                                                               | groupV03 |
| Pedestrian injured in collision with heavy transport vehicle or bus (ICD-10: V04)                                                                          | groupV04 |

|                                                                                                                                         |          |
|-----------------------------------------------------------------------------------------------------------------------------------------|----------|
| Pedestrian injured in collision with railway train or railway vehicle (ICD-10: V05)                                                     | groupV05 |
| Pedestrian injured in collision with other nonmotor vehicle (ICD-10: V06)                                                               | groupV06 |
| Pedestrian injured in other and unspecified transport accidents (ICD-10: V09)                                                           | groupV09 |
| Pedal cyclist injured in collision with pedestrian or animal (ICD-10: V10)                                                              | groupV10 |
| Pedal cyclist injured in collision with other pedal cycle (ICD-10: V11)                                                                 | groupV11 |
| Pedal cyclist injured in collision with two- or three-wheeled motor vehicle (ICD-10: V12)                                               | groupV12 |
| Pedal cyclist injured in collision with car, pick-up truck or van (ICD-10: V13)                                                         | groupV13 |
| Pedal cyclist injured in collision with heavy transport vehicle or bus (ICD-10: V14)                                                    | groupV14 |
| Pedal cyclist injured in collision with railway train or railway vehicle (ICD-10: V15)                                                  | groupV15 |
| Pedal cyclist injured in collision with other nonmotor vehicle (ICD-10: V16)                                                            | groupV16 |
| Pedal cyclist injured in collision with fixed or stationary object (ICD-10: V17)                                                        | groupV17 |
| Pedal cyclist injured in noncollision transport accident (ICD-10: V18)                                                                  | groupV18 |
| Pedal cyclist injured in other and unspecified transport accidents (ICD-10: V19)                                                        | groupV19 |
| Motorcycle rider injured in collision with pedestrian or animal (ICD-10: V20)                                                           | groupV20 |
| Motorcycle rider injured in collision with pedal cycle (ICD-10: V21)                                                                    | groupV21 |
| Motorcycle rider injured in collision with two- or three-wheeled motor vehicle (ICD-10: V22)                                            | groupV22 |
| Motorcycle rider injured in collision with car, pick-up truck or van (ICD-10: V23)                                                      | groupV23 |
| Motorcycle rider injured in collision with heavy transport vehicle or bus (ICD-10: V24)                                                 | groupV24 |
| Motorcycle rider injured in collision with other nonmotor vehicle (ICD-10: V26)                                                         | groupV26 |
| Motorcycle rider injured in collision with fixed or stationary object (ICD-10: V27)                                                     | groupV27 |
| Motorcycle rider injured in noncollision transport accident (ICD-10: V28)                                                               | groupV28 |
| Motorcycle rider injured in other and unspecified transport accidents (ICD-10: V29)                                                     | groupV29 |
| Occupant of three-wheeled motor vehicle injured in collision with pedal cycle (ICD-10: V31)                                             | groupV31 |
| Occupant of three-wheeled motor vehicle injured in collision with car, pick-up truck or van (ICD-10: V33)                               | groupV33 |
| Occupant of three-wheeled motor vehicle injured in collision with railway train or railway vehicle (ICD-10: V35)                        | groupV35 |
| Occupant of three-wheeled motor vehicle injured in collision with fixed or stationary object (ICD-10: V37)                              | groupV37 |
| Occupant of three-wheeled motor vehicle injured in noncollision transport accident (ICD-10: V38)                                        | groupV38 |
| Occupant of three-wheeled motor vehicle injured in other and unspecified transport accidents (ICD-10: V39)                              | groupV39 |
| Car occupant injured in collision with pedestrian or animal (ICD-10: V40)                                                               | groupV40 |
| Car occupant injured in collision with pedal cycle (ICD-10: V41)                                                                        | groupV41 |
| Car occupant injured in collision with two- or three-wheeled motor vehicle (ICD-10: V42)                                                | groupV42 |
| Car occupant injured in collision with car, pick-up truck or van (ICD-10: V43)                                                          | groupV43 |
| Car occupant injured in collision with heavy transport vehicle or bus (ICD-10: V44)                                                     | groupV44 |
| Car occupant injured in collision with railway train or railway vehicle (ICD-10: V45)                                                   | groupV45 |
| Car occupant injured in collision with other nonmotor vehicle (ICD-10: V46)                                                             | groupV46 |
| Car occupant injured in collision with fixed or stationary object (ICD-10: V47)                                                         | groupV47 |
| Car occupant injured in noncollision transport accident (ICD-10: V48)                                                                   | groupV48 |
| Occupant of pick-up truck or van injured in collision with car, pick-up truck or van (ICD-10: V53)                                      | groupV53 |
| Occupant of pick-up truck or van injured in collision with heavy transport vehicle or bus (ICD-10: V54)                                 | groupV54 |
| Occupant of pick-up truck or van injured in collision with railway train or railway vehicle (ICD-10: V55)                               | groupV55 |
| Occupant of pick-up truck or van injured in collision with fixed or stationary object (ICD-10: V57)                                     | groupV57 |
| Occupant of pick-up truck or van injured in noncollision transport accident (ICD-10: V58)                                               | groupV58 |
| Occupant of pick-up truck or van injured in other and unspecified transport accidents (ICD-10: V59)                                     | groupV59 |
| Occupant of heavy transport vehicle injured in collision with car, pick-up truck or van (ICD-10: V63)                                   | groupV63 |
| Occupant of heavy transport vehicle injured in collision with heavy transport vehicle or bus (ICD-10: V64)                              | groupV64 |
| Occupant of heavy transport vehicle injured in collision with railway train or railway vehicle (ICD-10: V65)                            | groupV65 |
| Occupant of heavy transport vehicle injured in noncollision transport accident (ICD-10: V68)                                            | groupV68 |
| Occupant of heavy transport vehicle injured in other and unspecified transport accidents (ICD-10: V69)                                  | groupV69 |
| Bus occupant injured in collision with pedestrian or animal (ICD-10: V70)                                                               | groupV70 |
| Bus occupant injured in collision with car, pick-up truck or van (ICD-10: V73)                                                          | groupV73 |
| Bus occupant injured in collision with heavy transport vehicle or bus (ICD-10: V74)                                                     | groupV74 |
| Bus occupant injured in collision with other nonmotor vehicle (ICD-10: V76)                                                             | groupV76 |
| Bus occupant injured in collision with fixed or stationary object (ICD-10: V77)                                                         | groupV77 |
| Bus occupant injured in noncollision transport accident (ICD-10: V78)                                                                   | groupV78 |
| Bus occupant injured in other and unspecified transport accidents (ICD-10: V79)                                                         | groupV79 |
| Animal-rider or occupant of animal-drawn vehicle injured in transport accident (ICD-10: V80)                                            | groupV80 |
| Occupant of railway train or railway vehicle injured in transport accident (ICD-10: V81)                                                | groupV81 |
| Occupant of streetcar injured in transport accident (ICD-10: V82)                                                                       | groupV82 |
| Occupant of special vehicle mainly used on industrial premises injured in transport accident (ICD-10: V83)                              | groupV83 |
| Occupant of special vehicle mainly used in agriculture injured in transport accident (ICD-10: V84)                                      | groupV84 |
| Occupant of special construction vehicle injured in transport accident (ICD-10: V85)                                                    | groupV85 |
| Occupant of special all-terrain or other motor vehicle designed primarily for off-road use, injured in transport accident (ICD-10: V86) | groupV86 |
| Traffic accident of specified type but victim's mode of transport unknown (ICD-10: V87)                                                 | groupV87 |
| Nontraffic accident of specified type but victim's mode of transport unknown (ICD-10: V88)                                              | groupV88 |
| Motor- or nonmotor-vehicle accident, type of vehicle unspecified (ICD-10: V89)                                                          | groupV89 |
| Accident to watercraft causing drowning and submersion (ICD-10: V90)                                                                    | groupV90 |
| Accident to watercraft causing other injury (ICD-10: V91)                                                                               | groupV91 |
| Water-transport-related drowning and submersion without accident to watercraft (ICD-10: V92)                                            | groupV92 |
| Accident on board watercraft without accident to watercraft, not causing drowning and submersion (ICD-10: V93)                          | groupV93 |
| Other and unspecified water transport accidents (ICD-10: V94)                                                                           | groupV94 |
| Accident to powered aircraft causing injury to occupant (ICD-10: V95)                                                                   | groupV95 |
| Accident to nonpowered aircraft causing injury to occupant (ICD-10: V96)                                                                | groupV96 |
| Other specified air transport accidents (ICD-10: V97)                                                                                   | groupV97 |
| Other specified transport accidents (ICD-10: V98)                                                                                       | groupV98 |
| Unspecified transport accident (ICD-10: V99)                                                                                            | groupV99 |
| Fall on and from stairs and steps (ICD-10: W10)                                                                                         | groupW10 |
| Fall from cliff (ICD-10: W15)                                                                                                           | groupW15 |

|                                                                                                                                         |                     |
|-----------------------------------------------------------------------------------------------------------------------------------------|---------------------|
| Other fall on same level (ICD-10: W18)                                                                                                  | groupW18            |
| Unspecified fall (ICD-10: W19)                                                                                                          | groupW19            |
| Foreign body or object entering through skin (ICD-10: W45)                                                                              | groupW45            |
| Inhalation and ingestion of food causing obstruction of respiratory tract (ICD-10: W79)                                                 | groupW79            |
| Exposure to uncontrolled fire in building or structure (ICD-10: X00)                                                                    | groupX00            |
| Exposure to excessive natural cold (ICD-10: X31)                                                                                        | groupX31            |
| Accidental poisoning by and exposure to alcohol (ICD-10: X45)                                                                           | groupX45            |
| Exposure to unspecified factor (ICD-10: X59)                                                                                            | groupX59            |
| Intentional self-poisoning by and exposure to narcotics and psychodysleptics [hallucinogens], not elsewhere classified (ICD-10: X62)    | groupX62            |
| Intentional self-poisoning by and exposure to other gases and vapours (ICD-10: X67)                                                     | groupX67            |
| Intentional self-harm by hanging, strangulation and suffocation (ICD-10: X70)                                                           | groupX70            |
| Intentional self-harm by rifle, shotgun and larger firearm discharge (ICD-10: X73)                                                      | groupX73            |
| Intentional self-harm by jumping from a high place (ICD-10: X80)                                                                        | groupX80            |
| Assault by sharp object (ICD-10: X99)                                                                                                   | groupX99            |
| Neglect and abandonment (ICD-10: Y06)                                                                                                   | groupY06            |
| Other maltreatment (ICD-10: Y07)                                                                                                        | groupY07            |
| Poisoning by and exposure to nonopioid analgesics, antipyretics and antirheumatics, undetermined intent (ICD-10: Y10)                   | groupY10            |
| Poisoning by and exposure to narcotics and psychodysleptics [hallucinogens], not elsewhere classified, undetermined intent              | groupY12            |
| Poisoning by and exposure to other and unspecified drugs, medicaments and biological substances, undetermined intent (ICD-10: Y14)      | groupY14            |
| Drowning and submersion, undetermined intent (ICD-10: Y21)                                                                              | groupY21            |
| Falling, jumping or pushed from a high place, undetermined intent (ICD-10: Y30)                                                         | groupY30            |
| Unspecified event, undetermined intent (ICD-10: Y34)                                                                                    | groupY34            |
| Legal intervention (ICD-10: Y35)                                                                                                        | groupY35            |
| Operations of war (ICD-10: Y36)                                                                                                         | groupY36            |
| Systemic antibiotics (ICD-10: Y40)                                                                                                      | groupY40            |
| Other systemic anti-infectives and antiparasitics (ICD-10: Y41)                                                                         | groupY41            |
| Hormones and their synthetic substitutes and antagonists, not elsewhere classified (ICD-10: Y42)                                        | groupY42            |
| Agents primarily affecting blood constituents (ICD-10: Y44)                                                                             | groupY44            |
| Analgesics, antipyretics and anti-inflammatory drugs (ICD-10: Y45)                                                                      | groupY45            |
| Antiepileptics and antiparkinsonism drugs (ICD-10: Y46)                                                                                 | groupY46            |
| Sedatives, hypnotics and antianxiety drugs (ICD-10: Y47)                                                                                | groupY47            |
| Anaesthetics and therapeutic gases (ICD-10: Y48)                                                                                        | groupY48            |
| Psychotropic drugs, not elsewhere classified (ICD-10: Y49)                                                                              | groupY49            |
| Central nervous system stimulants, not elsewhere classified (ICD-10: Y50)                                                               | groupY50            |
| Drugs primarily affecting the autonomic nervous system (ICD-10: Y51)                                                                    | groupY51            |
| Agents primarily affecting the cardiovascular system (ICD-10: Y52)                                                                      | groupY52            |
| Agents primarily affecting the gastrointestinal system (ICD-10: Y53)                                                                    | groupY53            |
| Agents primarily affecting water-balance and mineral and uric acid metabolism (ICD-10: Y54)                                             | groupY54            |
| Agents primarily acting on smooth and skeletal muscles and the respiratory system (ICD-10: Y55)                                         | groupY55            |
| Topical agents primarily affecting skin and mucous membrane and ophthalmological, otorhinolaryngological and dental drugs (ICD-10: Y56) | groupY56            |
| Other and unspecified drugs and medicaments (ICD-10: Y57)                                                                               | groupY57            |
| Bacterial vaccines (ICD-10: Y58)                                                                                                        | groupY58            |
| Other and unspecified vaccines and biological substances (ICD-10: Y59)                                                                  | groupY59            |
| Unintentional cut, puncture, perforation or haemorrhage during surgical and medical care (ICD-10: Y60)                                  | groupY60            |
| Foreign object accidentally left in body during surgical and medical care (ICD-10: Y61)                                                 | groupY61            |
| Failure in dosage during surgical and medical care (ICD-10: Y63)                                                                        | groupY63            |
| Other misadventures during surgical and medical care (ICD-10: Y65)                                                                      | groupY65            |
| Nonadministration of surgical and medical care (ICD-10: Y66)                                                                            | groupY66            |
| Unspecified misadventure during surgical and medical care (ICD-10: Y69)                                                                 | groupY69            |
| Anaesthesiology devices associated with adverse incidents (ICD-10: Y70)                                                                 | groupY70            |
| Cardiovascular devices associated with adverse incidents (ICD-10: Y71)                                                                  | groupY71            |
| Otorhinolaryngological devices associated with adverse incidents (ICD-10: Y72)                                                          | groupY72            |
| Gastroenterology and urology devices associated with adverse incidents (ICD-10: Y73)                                                    | groupY73            |
| General hospital and personal-use devices associated with adverse incidents (ICD-10: Y74)                                               | groupY74            |
| Neurological devices associated with adverse incidents (ICD-10: Y75)                                                                    | groupY75            |
| Obstetric and gynaecological devices associated with adverse incidents (ICD-10: Y76)                                                    | groupY76            |
| Ophthalmic devices associated with adverse incidents (ICD-10: Y77)                                                                      | groupY77            |
| Radiological devices associated with adverse incidents (ICD-10: Y78)                                                                    | groupY78            |
| Orthopaedic devices associated with adverse incidents (ICD-10: Y79)                                                                     | groupY79            |
| Physical medicine devices associated with adverse incidents (ICD-10: Y80)                                                               | groupY80            |
| General- and plastic-surgery devices associated with adverse incidents (ICD-10: Y81)                                                    | groupY81            |
| Other and unspecified medical devices associated with adverse incidents (ICD-10: Y82)                                                   | groupY82            |
| Sequelae of transport accidents (ICD-10: Y85)                                                                                           | groupY85            |
| Sequelae of other accidents (ICD-10: Y86)                                                                                               | groupY86            |
| Sequelae of intentional self-harm, assault and events of undetermined intent (ICD-10: Y87)                                              | groupY87            |
| Sequelae with surgical and medical care as external cause (ICD-10: Y88)                                                                 | groupY88            |
| Sequelae of other external causes (ICD-10: Y89)                                                                                         | groupY89            |
| Evidence of alcohol involvement determined by blood alcohol level (ICD-10: Y90)                                                         | groupY90            |
| Evidence of alcohol involvement determined by level of intoxication (ICD-10: Y91)                                                       | groupY91            |
| Nosocomial condition (ICD-10: Y95)                                                                                                      | groupY95            |
| Work-related condition (ICD-10: Y96)                                                                                                    | groupY96            |
| Environmental-pollution-related condition (ICD-10: Y97)                                                                                 | groupY97            |
| op_peripheral_nerve                                                                                                                     | op_peripheral_nerve |
| op_spinal_root                                                                                                                          | op_spinal_root      |
| op_pituitary                                                                                                                            | op_pituitary        |
| op_thyroid                                                                                                                              | op_thyroid          |
| op_parathyroid                                                                                                                          | op_parathyroid      |



op\_adrenal  
op\_lens  
op\_retina  
op\_lung  
op\_appendix  
op\_colorectal  
op\_liver  
op\_gall\_bladder  
op\_pancreas  
op\_cabg  
op\_pci  
op\_pacemaker  
op\_aorta  
op\_carotid\_artery  
op\_cerebral\_artery  
op\_femoral\_artery  
op\_kidney  
op\_extracorporal\_kidney\_stone  
op\_bladder  
op\_prostate  
op\_uterus\_adnexa  
op\_knee\_replacement

op\_adrenal  
op\_lens  
op\_retina  
op\_lung  
op\_appendix  
op\_colorectal  
op\_liver  
op\_gall\_bladder  
op\_pancreas  
op\_cabg  
op\_pci  
op\_pacemaker  
op\_aorta  
op\_carotid\_artery  
op\_cerebral\_artery  
op\_femoral\_artery  
op\_kidney  
op\_extracorporal\_kidney\_stone  
op\_bladder  
op\_prostate  
op\_uterus\_adnexa  
op\_knee\_replacement

**Supplemental Table 2. Variable importance of the top 200 variables in the GBM model for varicose veins.**

| Variable                                                                   | Importance |
|----------------------------------------------------------------------------|------------|
| 1 Age deep-vein thrombosis diagnosed                                       | 127.66     |
| 2 Impedance of leg (left)                                                  | 83.49      |
| 3 Had other major operations                                               | 62.33      |
| 4 Surgery on leg arteries                                                  | 54.57      |
| 5 Standing height                                                          | 47.72      |
| 6 Ulcer of lower limb, not elsewhere classified (ICD-10: M79)              | 39.51      |
| 7 Age at first live birth                                                  | 36.04      |
| 8 Impedance of leg (right)                                                 | 33.00      |
| 9 Other soft tissue disorders, not elsewhere classified                    | 24.86      |
| 10 Birth weight of first child                                             | 22.59      |
| 11 Cellulitis (ICD-10: L03)                                                | 21.58      |
| 12 Age completed full time education                                       | 20.10      |
| 13 Place of birth in UK - north co-ordinate                                | 19.96      |
| 14 Impedance of arm (left)                                                 | 17.28      |
| 15 Other peripheral vascular diseases (ICD-10: I73)                        | 15.85      |
| 16 Comparative height size at age 10                                       | 15.79      |
| 17 Job code                                                                | 11.80      |
| 18 Impedance of arm (right)                                                | 11.40      |
| 19 Female genital prolapse (ICD-10: N81)                                   | 11.20      |
| 20 Number of days/week walked 10+ minutes                                  | 11.15      |
| 21 Age started wearing glasses or contact lenses                           | 10.55      |
| 22 Age at recruitment                                                      | 10.43      |
| 23 Trunk fat percentage                                                    | 9.49       |
| 24 Had major operations                                                    | 9.25       |
| 25 Venous complications in the puerperium (ICD-10: O88)                    | 9.17       |
| 26 Other dermatitis (ICD-10: L30)                                          | 9.07       |
| 27 Leg fat percentage (left)                                               | 8.98       |
| 28 Average total household income before tax                               | 8.42       |
| 29 Number of live births                                                   | 8.24       |
| 30 Age diabetes diagnosed                                                  | 8.16       |
| 31 Age started hormone-replacement therapy (HRT)                           | 7.97       |
| 32 Red blood cell (erythrocyte) distribution width                         | 7.54       |
| 33 Place of birth in UK - east co-ordinate                                 | 7.48       |
| 34 Platelet distribution width                                             | 7.42       |
| 35 Duration of moderate activity                                           | 7.06       |
| 36 Leg fat percentage (right)                                              | 6.91       |
| 37 Spherical power (left)                                                  | 6.81       |
| 38 Other arthritis (ICD-10: M13)                                           | 6.78       |
| 39 Age at last live birth                                                  | 6.77       |
| 40 Interpolated Age of participant when non-cancer illness first diagnosed | 6.45       |
| 41 Age when last used oral contraceptive pill                              | 6.43       |
| 42 Intra-ocular pressure, Goldmann-correlated (left)                       | 6.35       |
| 43 Neuroticism score                                                       | 6.20       |
| 44 Neutrophil percentage                                                   | 5.98       |
| 45 6mm asymmetry angle (right)                                             | 5.96       |
| 46 Platelet crit                                                           | 5.87       |
| 47 White blood cell (leukocyte) count                                      | 5.85       |
| 48 Ankle spacing width                                                     | 5.68       |
| 49 Mean time to correctly identify matches                                 | 5.67       |
| 50 Polyarthrosis (ICD-10: M15)                                             | 5.53       |
| 51 6mm asymmetry index (right)                                             | 5.50       |
| 52 Acquired deformities of fingers and toes (ICD-10: M20)                  | 5.38       |
| 53 Inguinal hernia (ICD-10: K40)                                           | 5.38       |
| 54 Time spent using computer                                               | 5.36       |
| 55 Ankle spacing width (left)                                              | 5.36       |
| 56 Forced vital capacity (FVC)                                             | 5.28       |
| 57 UK Biobank assessment centre                                            | 5.10       |
| 58 Immature reticulocyte fraction                                          | 5.08       |
| 59 Birth weight                                                            | 4.96       |
| 60 Weight                                                                  | 4.86       |
| 61 Corneal hysteresis (right)                                              | 4.81       |
| 62 Red blood cell (erythrocyte) count                                      | 4.78       |
| 63 Refractometry result unreliable (right)                                 | 4.67       |
| 64 Forced vital capacity (FVC), Best measure                               | 4.60       |
| 65 Frequency of walking for pleasure in last 4 weeks                       | 4.55       |
| 66 Internal derangement of knee (ICD-10: M23)                              | 4.44       |
| 67 Monocyte percentage                                                     | 4.41       |
| 68 Age last used hormone-replacement therapy (HRT)                         | 4.31       |
| 69 Hip circumference                                                       | 4.15       |
| 70 6mm weak meridian (right)                                               | 4.12       |
| 71 Reason for reducing amount of alcohol drunk                             | 4.10       |
| 72 Platelet count                                                          | 4.02       |
| 73 Cereal intake                                                           | 3.88       |
| 74 Alcohol intake frequency.                                               | 3.86       |
| 75 Potassium in urine                                                      | 3.77       |

|     |                                                                   |      |
|-----|-------------------------------------------------------------------|------|
| 76  | Intra-ocular pressure, corneal-compensated (left)                 | 3.68 |
| 77  | Diastolic blood pressure, manual reading                          | 3.65 |
| 78  | Vitiligo (ICD-10: L80)                                            | 3.65 |
| 79  | Calibration coefficients - y offset                               | 3.63 |
| 80  | Time when initial screen shown                                    | 3.61 |
| 81  | Duration screen displayed                                         | 3.59 |
| 82  | Systolic blood pressure, automated reading                        | 3.57 |
| 83  | Arm fat percentage (right)                                        | 3.56 |
| 84  | op skin lesion                                                    | 3.53 |
| 85  | Forced expiratory volume in 1-second (FEV1), predicted percentage | 3.50 |
| 86  | Fraction acceleration <= 9 milli-gravities                        | 3.46 |
| 87  | Age asthma diagnosed                                              | 3.45 |
| 88  | Other disorders of skin and subcutaneous tissue                   | 3.44 |
| 89  | Congenital malformations of cardiac septa (ICD-10: Q21)           | 3.42 |
| 90  | Average acceleration 13:00 - 13:59                                | 3.41 |
| 91  | Age started oral contraceptive pill                               | 3.41 |
| 92  | 3mm weak meridian (right)                                         | 3.41 |
| 93  | Average acceleration 07:00 - 07:59                                | 3.40 |
| 94  | Spherical power (right)                                           | 3.39 |
| 95  | Speech-reception-threshold (SRT) estimate (right)                 | 3.34 |
| 96  | Benign neoplasm of eye and adnexa (ICD-10: D31)                   | 3.27 |
| 97  | Bread type                                                        | 3.26 |
| 98  | Reason for reducing amount of alcohol drunk (pilot)               | 3.24 |
| 99  | Leg fat-free mass (right)                                         | 3.17 |
| 100 | Mineral and other dietary supplements                             | 3.16 |
| 101 | Age COPD (Chronic Obstructive Pulmonary Disease) diagnosed        | 3.14 |
| 102 | Sodium in urine acquisition time                                  | 3.10 |
| 103 | Haematocrit percentage                                            | 3.05 |
| 104 | Number of full sisters                                            | 3.04 |
| 105 | Heel bone mineral density (BMD) T-score, automated                | 2.99 |
| 106 | Average weekly beer plus cider intake                             | 2.99 |
| 107 | Mean corpuscular haemoglobin concentration                        | 2.97 |
| 108 | Invitation to physical activity study, date sent                  | 2.87 |
| 109 | Calibration coefficients - x slope                                | 2.84 |
| 110 | Qualifications                                                    | 2.83 |
| 111 | Monocyte count                                                    | 2.83 |
| 112 | Other disorders of urinary system (ICD-10: N39)                   | 2.81 |
| 113 | Calibration - maximum x stationary value                          | 2.80 |
| 114 | Neutrophil count                                                  | 2.77 |
| 115 | 3mm strong meridian (left)                                        | 2.77 |
| 116 | Why stopped smoking                                               | 2.74 |
| 117 | Fraction acceleration <= 1300 milli-gravities                     | 2.73 |
| 118 | Townsend deprivation index at recruitment                         | 2.69 |
| 119 | Microalbumin in urine                                             | 2.64 |
| 120 | Average acceleration 20:00 - 20:59                                | 2.62 |
| 121 | Umbilical hernia (ICD-10: K42)                                    | 2.61 |
| 122 | Obesity (ICD-10: E66)                                             | 2.57 |
| 123 | Number of days/week of moderate physical activity                 | 2.52 |
| 124 | Time spent driving                                                | 2.49 |
| 125 | ECG/bike method for fitness test                                  | 2.48 |
| 126 | Types of physical activity in last 4 weeks                        | 2.46 |
| 127 | Mouth/teeth dental problems                                       | 2.46 |
| 128 | 6mm strong meridian angle (right)                                 | 2.43 |
| 129 | Lymphocyte count                                                  | 2.42 |
| 130 | High light scatter reticulocyte percentage                        | 2.41 |
| 131 | Average acceleration 17:00 - 17:59                                | 2.39 |
| 132 | Basophil count                                                    | 2.38 |
| 133 | Father's age                                                      | 2.36 |
| 134 | Peak expiratory flow (PEF)                                        | 2.35 |
| 135 | Intra-ocular pressure, corneal-compensated (right)                | 2.35 |
| 136 | Femoral hernia (ICD-10: K41)                                      | 2.35 |
| 137 | Cereal type                                                       | 2.34 |
| 138 | Forced expiratory volume in 1-second (FEV1), predicted            | 2.33 |
| 139 | Pulse wave reflection index                                       | 2.30 |
| 140 | Average acceleration 00:00 - 00:59                                | 2.29 |
| 141 | Pulse rate, automated reading                                     | 2.25 |
| 142 | Other arthrosis (ICD-10: M19)                                     | 2.19 |
| 143 | Heel Broadband ultrasound attenuation, direct entr                | 2.18 |
| 144 | Osteoporosis without pathological fracture (ICD-10: M81)          | 2.17 |
| 145 | Rash and other nonspecific skin eruption (ICD-10: R21)            | 2.17 |
| 146 | Number of cigarettes previously smoked daily                      | 2.17 |
| 147 | Surgical operation and other surgical procedures                  | 2.17 |
| 148 | Light smokers, at least 100 smokes in lifetime                    | 2.15 |
| 149 | Which eye(s) affected by amblyopia (lazy eye)                     | 2.15 |
| 150 | Index of best refractometry result (left)                         | 2.13 |
| 151 | Age high blood pressure diagnosed                                 | 2.11 |
| 152 | Job code - deduced                                                | 2.11 |

|     |                                                                                                                                                                 |      |
|-----|-----------------------------------------------------------------------------------------------------------------------------------------------------------------|------|
| 153 | Handedness (chirality/laterality)                                                                                                                               | 2.09 |
| 154 | Average weekly champagne plus white wine intake                                                                                                                 | 2.07 |
| 155 | Smoked cigarette or pipe within last hour                                                                                                                       | 2.07 |
| 156 | Age when attended assessment centre                                                                                                                             | 2.04 |
| 157 | Age hay fever, rhinitis or eczema diagnosed                                                                                                                     | 2.01 |
| 158 | Leg pain on walking : action taken                                                                                                                              | 2.00 |
| 159 | Astigmatism angle (left)                                                                                                                                        | 2.00 |
| 160 | Salad / raw vegetable intake                                                                                                                                    | 2.00 |
| 161 | Wear duration during 01:00 - 01:59                                                                                                                              | 1.99 |
| 162 | Year of birth                                                                                                                                                   | 1.98 |
| 163 | Other and unspecified injuries of wrist and hand                                                                                                                | 1.97 |
| 164 | Fraction acceleration <= 8 milli-gravities                                                                                                                      | 1.96 |
| 165 | Haemoglobin concentration                                                                                                                                       | 1.96 |
| 166 | Corneal resistance factor (left)                                                                                                                                | 1.96 |
| 167 | Number of treatments/medications taken                                                                                                                          | 1.93 |
| 168 | Microalbumin in urine acquisition time                                                                                                                          | 1.93 |
| 169 | Complications of procedures, not elsewhere classified                                                                                                           | 1.92 |
| 170 | Cooked vegetable intake                                                                                                                                         | 1.90 |
| 171 | Temperature maximum                                                                                                                                             | 1.90 |
| 172 | Other hypothyroidism (ICD-10: E03)                                                                                                                              | 1.88 |
| 173 | Other medical procedures as cause of abnormal reaction of patient, or of later complication, without mention of misadventure at time of procedure (ICD-10: Y84) | 1.87 |
| 174 | Duration of walks                                                                                                                                               | 1.86 |
| 175 | Heel bone mineral density (BMD), manual entry                                                                                                                   | 1.85 |
| 176 | Vascular/heart problems diagnosed by doctor                                                                                                                     | 1.85 |
| 177 | Wear duration during 07:00 - 07:59                                                                                                                              | 1.85 |
| 178 | Diabetes diagnosed by doctor                                                                                                                                    | 1.85 |
| 179 | Coffee type                                                                                                                                                     | 1.85 |
| 180 | Waist circumference                                                                                                                                             | 1.85 |
| 181 | Allergic contact dermatitis (ICD-10: L23)                                                                                                                       | 1.84 |
| 182 | Age cataract diagnosed                                                                                                                                          | 1.84 |
| 183 | Leisure/social activities                                                                                                                                       | 1.84 |
| 184 | Trunk fat mass                                                                                                                                                  | 1.83 |
| 185 | Variation in diet                                                                                                                                               | 1.83 |
| 186 | 3mm strong meridian (right)                                                                                                                                     | 1.81 |
| 187 | Forced expiratory volume in 1-second (FEV1)                                                                                                                     | 1.79 |
| 188 | Processed meat intake                                                                                                                                           | 1.79 |
| 189 | Time to complete round                                                                                                                                          | 1.78 |
| 190 | 6mm weak meridian (left)                                                                                                                                        | 1.77 |
| 191 | Years since last breast cancer screening / mammogram                                                                                                            | 1.76 |
| 192 | Salt added to food                                                                                                                                              | 1.76 |
| 193 | Erosion and ectropion of cervix uteri (ICD-10: N86)                                                                                                             | 1.76 |
| 194 | Sodium in urine                                                                                                                                                 | 1.75 |
| 195 | Fraction acceleration <= 7 milli-gravities                                                                                                                      | 1.74 |
| 196 | Unspecified lump in breast (ICD-10: N63)                                                                                                                        | 1.74 |
| 197 | Other diseases of digestive system (ICD-10: K92)                                                                                                                | 1.72 |
| 198 | Duration to complete numeric path (trail #1)                                                                                                                    | 1.72 |
| 199 | Haemorrhoids (ICD-10: I84)                                                                                                                                      | 1.70 |
| 200 | Mean corpuscular volume                                                                                                                                         | 1.68 |

**Supplemental Table 3. Results from all 3 multivariable-adjusted Cox models.**

| Variable    |                                              | Age- and sex-adjusted<br>HR (95%CI) | Fully adjusted**<br>HR (95%CI) | Fully adjusted** + PC1-5<br>HR (95%CI) |
|-------------|----------------------------------------------|-------------------------------------|--------------------------------|----------------------------------------|
| Traditional | History of DVT                               | 2.71 (2.28-3.23)                    | 2.60 (2.18-3.11)               | 2.68 (1.95-3.68)                       |
|             | Birth weight of first child                  | 1.23 (1.05-1.44)                    | 1.21 (1.03-1.42)               | 1.13 (0.85-1.51)                       |
|             | Number of live births                        | 1.12 (0.99-1.27)                    | 1.12 (0.99-1.27)               | 1.10 (0.88-1.39)                       |
|             | BMI                                          | 1.11 (1.00-1.24)                    | 1.11 (0.99-1.24)               | 0.96 (0.78-1.18)                       |
|             | Waist-hip ratio                              | 1.10 (0.97-1.26)                    | 1.01 (0.88-1.16)               | 1.07 (0.83-1.37)                       |
| Novel       | Leg bioimpedance                             | 0.56 (0.51-0.63)                    | 0.43 (0.39-0.50)               | 0.51 (0.41-0.63)                       |
|             | Height                                       | 1.70 (1.48-1.96)                    | 1.74 (1.51-2.01)               | 1.54 (1.19-1.99)                       |
|             | Major operations                             | 0.75 (0.69-0.82)                    | 0.77 (0.70-0.84)               | 0.84 (0.71-0.98)                       |
|             | Surgery on leg arteries                      | 3.71 (2.46-5.62)                    | 3.50 (2.30-5.33)               | 2.99 (1.34-6.67)                       |
|             | Ulceration of lower limb<br>(ICD-10: L97)    | 4.65 (2.36-9.16)                    | 3.00 (1.36-6.61)               | 6.18 (2.05-18.6)                       |
|             | Other soft tissue disorders<br>(ICD-10: M79) | 2.01 (1.58-2.55)                    | 1.66 (1.30-2.12)               | 1.73 (1.13-2.65)                       |
|             | Cellulitis (ICD-10: L03)                     | 2.09 (1.52-2.87)                    | 1.79 (1.29-2.48)               | 1.90 (1.09-3.30)                       |
| Debated     | Smoking                                      | 1.04 (0.92-1.19)                    | 1.04 (0.91-1.19)               | 1.23 (1.00-1.51)                       |
|             | Systolic blood pressure                      | 0.81 (0.72-0.90)                    | 0.79 (0.71-0.88)               | 0.81 (0.67-0.99)                       |
|             | Age completed full time<br>education         | 0.80 (0.70-0.91)                    | 0.82 (0.72-0.93)               | 0.85 (0.68-1.06)                       |
|             | Oral contraceptive use                       | 0.67 (0.44-1.02)                    | 0.68 (0.44-1.04)               | 0.83 (0.41-1.70)                       |
|             | Hormone replacement<br>therapy               | 1.25 (1.04-1.49)                    | 1.25 (1.04-1.50)               | 1.31 (0.96-1.81)                       |
|             | Days per week walked >10<br>minutes          | 1.32 (1.18-1.47)                    | 1.33 (1.19-1.48)               | 1.43 (1.18-1.75)                       |
|             | Duration of moderate daily<br>activity       | 1.00 (0.87-1.14)                    | 1.00 (0.88-1.15)               | 1.22 (0.95-1.56)                       |

DVT: deep vein thrombosis. BMI: body mass index. HR: hazard ratio. CI: confidence interval. PC: principal components. Associations between candidate variables and varicose veins are reported for as HR and 95% CI for the upper vs. lower quartile for continuous variables, or presence vs. absence for binary variables.

\*\*Fully adjusted model includes age, gender, BMI, history of DVT, and waist-hip ratio. Pregnancy-specific factors, oral contraceptive use, and hormone replacement therapy were only assessed in female study participants.

**Supplemental Table 4. Predictive capacity of multivariable models of varicose veins.**

| Cox model              | Variable                                                                           | C-index |
|------------------------|------------------------------------------------------------------------------------|---------|
| <b>Both genders</b>    | Baseline (age and sex)                                                             | 0.560   |
|                        | History of DVT                                                                     | 0.575   |
|                        | Leg impedance                                                                      | 0.645   |
|                        | Major operation                                                                    | 0.584   |
|                        | Leg artery operation                                                               | 0.583   |
|                        | Height                                                                             | 0.610   |
|                        | Non-pressure chronic ulcer of lower limb, not elsewhere classified (ICD10: L97)    | 0.575   |
|                        | Other and unspecified soft tissue disorders, not elsewhere classified (ICD10: M79) | 0.578   |
|                        | Cellulitis and acute lymphangitis (ICD10: L03)                                     | 0.577   |
|                        | Age finished education                                                             | 0.576   |
| <b>Female only</b>     | History of DVT                                                                     | 0.560   |
|                        | Leg impedance                                                                      | 0.630   |
|                        | Major operation                                                                    | 0.570   |
|                        | Leg artery operation                                                               | 0.580   |
|                        | Height                                                                             | 0.600   |
|                        | Non-pressure chronic ulcer of lower limb, not elsewhere classified (ICD10: L97)    | 0.560   |
|                        | Age at first live birth                                                            | 0.560   |
|                        | Other and unspecified soft tissue disorders, not elsewhere classified (ICD10: M79) | 0.560   |
|                        | Birth weight of first child                                                        | 0.570   |
|                        | Cellulitis and acute lymphangitis (ICD10: L03)                                     | 0.560   |
| Age finished education | 0.560                                                                              |         |
| <b>Male only</b>       | History of DVT                                                                     | 0.57    |
|                        | Leg impedance                                                                      | 0.66    |
|                        | Major operation                                                                    | 0.58    |
|                        | Leg artery operation                                                               | 0.58    |
|                        | Height                                                                             | 0.61    |
|                        | Non-pressure chronic ulcer of lower limb, not elsewhere classified (ICD10: L97)    | 0.57    |
|                        | Other and unspecified soft tissue disorders, not elsewhere classified (ICD10: M79) | 0.57    |
|                        | Cellulitis and acute lymphangitis (ICD10: L03)                                     | 0.57    |
|                        | Age finished education                                                             | 0.57    |

**Supplemental Table 5. Genetic loci associated with varicose veins with genome wide significance at P < 5.0 E-8**

| SNP           | CHR | Position (b37) | Effect allele | non-effect allele | EAF cases | EAF controls | beta   | SE    | P-value  | MACH-Rsq | Nearby genes                                                                                                                                                                                                                                                                                                                       |
|---------------|-----|----------------|---------------|-------------------|-----------|--------------|--------|-------|----------|----------|------------------------------------------------------------------------------------------------------------------------------------------------------------------------------------------------------------------------------------------------------------------------------------------------------------------------------------|
| rs11121615    | 1   | 10825577       | T             | C                 | 0.64      | 0.69         | -0.263 | 0.015 | 3.71E-65 | 0.99     | CASZ1<br>APRT,CBFA2T3,CDT1,CTU2,CYBA,GALNS,IL17C,LOC339059,LOC100129697,LOC100289580,LOC101927793,MIR4722,MVD,PABPN1L,PIEZO1,RNF166,SNAI3,SNAI3-AS1,TRAPPC2L,ZC3H18                                                                                                                                                                |
| rs2911463     | 16  | 88835545       | A             | G                 | 0.65      | 0.69         | -0.174 | 0.016 | 4.81E-29 | 0.98     |                                                                                                                                                                                                                                                                                                                                    |
| rs2861819     | 2   | 68489221       | C             | G                 | 0.69      | 0.65         | 0.159  | 0.016 | 1.40E-23 | 0.99     | CNRIP1,PNO1,PPP3R1,WDR92                                                                                                                                                                                                                                                                                                           |
| rs28558138    | 4   | 26818080       | C             | G                 | 0.39      | 0.42         | -0.135 | 0.015 | 5.00E-19 | 0.98     | LOC105374546,STM2,TBC1D19                                                                                                                                                                                                                                                                                                          |
| rs8053350     | 16  | 88794403       | A             | G                 | 0.53      | 0.56         | -0.132 | 0.015 | 6.78E-19 | 0.99     | CTU2,CYBA,IL17C,LOC339059,LOC100289580,MIR4722,MVD,PIEZO1,RNF166,SNAI3,SNAI3-AS1                                                                                                                                                                                                                                                   |
| rs3101725     | 5   | 127524018      | C             | T                 | 0.73      | 0.76         | -0.143 | 0.017 | 8.93E-18 | 1        | FBN2,LINC01184,SLC12A2                                                                                                                                                                                                                                                                                                             |
| rs11135046    | 5   | 158230013      | T             | G                 | 0.51      | 0.54         | -0.12  | 0.015 | 3.11E-16 | 1        | EBF1<br>BTN1A1,BTN2A1,BTN2A2,BTN2A3P,BTN3A1,BTN3A2,BTN3A3,HCG11,HFE,HIST1H1C,HIST1H1D,HIST1H1E,HIST1H1T,HIST1H2AC,HIST1H2AD,HIST1H2AE,HIST1H2BC,HIST1H2BD,HIST1H2BE,HIST1H2BF,HIST1H2BG,HIST1H2BH,HIST1H2BI,HIST1H3D,HIST1H3E,HIST1H3F,HIST1H3G,HIST1H4C,HIST1H4D,HIST1H4E,HIST1H4F,HIST1H4G,HIST1H4H,HMGN4,LOC285819,LOC108783645 |
| rs7773004     | 6   | 26267755       | G             | A                 | 0.47      | 0.49         | -0.113 | 0.015 | 2.30E-14 | 1        |                                                                                                                                                                                                                                                                                                                                    |
| rs12625547    | 20  | 50154647       | G             | T                 | 0.15      | 0.18         | -0.147 | 0.02  | 6.88E-13 | 0.99     | NFATC2                                                                                                                                                                                                                                                                                                                             |
| rs236597      | 17  | 68235925       | T             | C                 | 0.72      | 0.74         | -0.117 | 0.017 | 1.63E-12 | 0.98     | KCNJ2,KCNJ2-AS1                                                                                                                                                                                                                                                                                                                    |
| rs7614922     | 3   | 128238222      | C             | G                 | 0.16      | 0.14         | 0.14   | 0.02  | 3.67E-12 | 1        | DNAJB8,DNAJB8-AS1,GATA2,GATA2-AS1,LINC01565,LOC90246,RPN1                                                                                                                                                                                                                                                                          |
| rs73107980    | 12  | 48187601       | T             | C                 | 0.26      | 0.24         | 0.11   | 0.017 | 7.61E-11 | 0.98     | HDAC7,RAPGEF3,SLC48A1,VDR                                                                                                                                                                                                                                                                                                          |
| rs7469817     | 9   | 118296829      | C             | G                 | 0.76      | 0.74         | 0.112  | 0.017 | 9.63E-11 | 1        | DEC1,LOC101928775                                                                                                                                                                                                                                                                                                                  |
| rs2241173     | 17  | 70028445       | G             | A                 | 0.55      | 0.58         | -0.095 | 0.015 | 1.62E-10 | 0.99     | LINC01152,LINC02095,LINC02097,LOC102723517,SOX9-AS1,C20orf204,DNAJC5,LKAAEAR1,MIR647,MIR941-1,MIR941-1,MIR941-2,MIR941-2,MIR941-2,MIR941-3,MIR941-3,MIR941-3,MIR941-4,MIR941-4,MIR941-4,MIR941-5,MIR941-5,MIR941-5,MIR941-5,MIR941-5,MIR6813,OPRL1,PRPF6,RGS19,SAMD10,SOX18,TCEA2,UCKL1,UCKL1-AS1,ZNF512B                          |
| rs816943      | 20  | 62676009       | G             | A                 | 0.45      | 0.48         | -0.094 | 0.015 | 1.98E-10 | 0.99     | HCG4B,HCG9,HLA-A,HLA-A,HLA-J,PPP1R11,RNF39,TRIM31,TRIM31-AS1,TRIM40,ZNRD1,ZNRD1ASP                                                                                                                                                                                                                                                 |
| rs1061539     | 6   | 29937555       | C             | T                 | 0.81      | 0.83         | -0.113 | 0.019 | 1.59E-09 | 1        |                                                                                                                                                                                                                                                                                                                                    |
| rs1549063     | 13  | 106264083      | T             | A                 | 0.38      | 0.36         | 0.091  | 0.015 | 2.11E-09 | 1        |                                                                                                                                                                                                                                                                                                                                    |
| rs16828263    | 3   | 118071923      | C             | T                 | 0.0016    | 0.00056      | 1.118  | 0.19  | 4.37E-09 | 0.93     |                                                                                                                                                                                                                                                                                                                                    |
| rs9719461     | 7   | 632715         | T             | C                 | 0.68      | 0.66         | 0.092  | 0.016 | 7.36E-09 | 0.99     | LOC101926963,LOC101927000,PRKAR1B                                                                                                                                                                                                                                                                                                  |
| rs2263321     | 6   | 31340908       | A             | G                 | 0.31      | 0.33         | -0.091 | 0.016 | 8.42E-09 | 1.02     | HLA-B,MICA,MICA-AS1,MIR6891                                                                                                                                                                                                                                                                                                        |
| rs247749      | 5   | 76296735       | C             | T                 | 0.31      | 0.29         | 0.099  | 0.017 | 8.77E-09 | 0.86     | AGGF1,CRHBP                                                                                                                                                                                                                                                                                                                        |
| rs75522736    | 6   | 135015921      | G             | A                 | 0.14      | 0.16         | -0.12  | 0.021 | 1.07E-08 | 1        |                                                                                                                                                                                                                                                                                                                                    |
| rs553399706   | 16  | 74615577       | A             | G                 | 0.0017    | 0.00063      | 1.064  | 0.187 | 1.32E-08 | 0.92     | GLG1,RFWD3                                                                                                                                                                                                                                                                                                                         |
| rs62512472    | 8   | 87595590       | A             | G                 | 0.45      | 0.43         | 0.084  | 0.015 | 1.38E-08 | 0.99     | CNGB3,CPNE3,RMDN1<br>FGF21,FUT1,FUT2,IZUMO1,LOC105447645,MAMSTR,NTN5,RASIP1,SEC1P                                                                                                                                                                                                                                                  |
| rs584768      | 19  | 49213284       | A             | G                 | 0.56      | 0.53         | 0.084  | 0.015 | 1.43E-08 | 1        |                                                                                                                                                                                                                                                                                                                                    |
| Not available | 6   | 127452639      | G             | C                 | 0.48      | 0.5          | -0.083 | 0.015 | 1.82E-08 | 1        | RSPO3                                                                                                                                                                                                                                                                                                                              |
| rs2089657     | 2   | 30470178       | T             | C                 | 0.2       | 0.21         | -0.104 | 0.019 | 2.41E-08 | 0.99     | LBH                                                                                                                                                                                                                                                                                                                                |
| rs12594708    | 15  | 96182066       | T             | C                 | 0.065     | 0.076        | -0.165 | 0.03  | 3.72E-08 | 0.98     |                                                                                                                                                                                                                                                                                                                                    |
| rs186005582   | 6   | 68957548       | T             | C                 | 0.001     | 0.00029      | 1.341  | 0.245 | 4.24E-08 | 0.85     | LINC02549                                                                                                                                                                                                                                                                                                                          |
| rs192647746   | 4   | 182760366      | G             | A                 | 0.0024    | 0.0011       | 0.863  | 0.158 | 4.73E-08 | 0.92     | TEMN3-AS1                                                                                                                                                                                                                                                                                                                          |

**Supplemental Table 6. SNPs associated with varicose veins that reached genome-wide significance.**

| SNP        | CHR | Position (b37) | Effect allele | Other allele | EAF  | beta    | SE     | P-value  | MACH-Rsq |
|------------|-----|----------------|---------------|--------------|------|---------|--------|----------|----------|
| rs11121615 | 1   | 10825577       | T             | C            | 0.69 | -0.2628 | 0.0154 | 3.71E-65 | 0.99     |
| rs36083532 | 1   | 10839085       | T             | C            | 0.69 | -0.2315 | 0.0155 | 2.88E-50 | 0.98     |
| rs7519604  | 1   | 10824835       | C             | T            | 0.76 | -0.2333 | 0.0164 | 5.12E-46 | 0.99     |
| rs10864469 | 1   | 10825334       | C             | A            | 0.76 | -0.2332 | 0.0164 | 5.96E-46 | 0.99     |
| rs7512641  | 1   | 10822171       | A             | T            | 0.74 | -0.2306 | 0.0162 | 1.02E-45 | 0.98     |
| rs10864470 | 1   | 10831408       | T             | C            | 0.71 | -0.22   | 0.0157 | 1.69E-44 | 0.99     |
| rs58064215 | 1   | 10833232       | G             | C            | 0.71 | -0.2169 | 0.0156 | 8.74E-44 | 1        |
| rs12031981 | 1   | 10834579       | C             | T            | 0.73 | -0.2173 | 0.016  | 4.42E-42 | 0.99     |
| rs2235699  | 1   | 10820215       | A             | G            | 0.73 | -0.2171 | 0.0162 | 3.92E-41 | 0.96     |
| rs6540948  | 1   | 10823786       | A             | T            | 0.76 | -0.2111 | 0.0166 | 3.06E-37 | 0.99     |
| rs205472   | 1   | 10832322       | A             | G            | 0.75 | -0.2071 | 0.0163 | 5.04E-37 | 0.99     |
| rs205474   | 1   | 10832861       | T             | C            | 0.75 | -0.2067 | 0.0163 | 7.08E-37 | 1        |
| rs6668047  | 1   | 10828179       | A             | G            | 0.75 | -0.2066 | 0.0164 | 2.29E-36 | 0.98     |
| rs2073017  | 1   | 10822808       | C             | T            | 0.79 | -0.2049 | 0.0173 | 2.12E-32 | 0.98     |
| rs205476   | 1   | 10833717       | A             | G            | 0.78 | -0.1984 | 0.017  | 1.32E-31 | 0.99     |
| rs205477   | 1   | 10833820       | T             | C            | 0.78 | -0.1979 | 0.017  | 1.89E-31 | 0.99     |
| rs11121616 | 1   | 10830428       | C             | T            | 0.13 | 0.2328  | 0.0202 | 7.85E-31 | 0.99     |
| rs172228   | 1   | 10831218       | C             | G            | 0.15 | 0.2189  | 0.0192 | 3.95E-30 | 1        |
| rs2911463  | 16  | 88835545       | A             | G            | 0.69 | -0.1744 | 0.0156 | 4.81E-29 | 0.98     |
| rs9933309  | 16  | 88844932       | C             | T            | 0.7  | -0.1722 | 0.0155 | 1.48E-28 | 1        |
| rs9932423  | 16  | 88846849       | A             | C            | 0.31 | 0.1712  | 0.0155 | 2.18E-28 | 1        |
| rs2002833  | 16  | 88842117       | A             | G            | 0.67 | -0.1696 | 0.0154 | 2.42E-28 | 0.99     |
| rs2911460  | 16  | 88842700       | G             | A            | 0.68 | -0.168  | 0.0154 | 1.49E-27 | 0.99     |
| rs2932690  | 16  | 88842953       | A             | G            | 0.68 | -0.1665 | 0.0154 | 2.82E-27 | 0.99     |
| rs6660242  | 1   | 10845840       | A             | G            | 0.7  | -0.1676 | 0.0156 | 9.29E-27 | 0.99     |
| rs6698228  | 1   | 10842566       | A             | G            | 0.67 | -0.1628 | 0.0157 | 2.37E-25 | 0.96     |
| rs475596   | 16  | 88846951       | C             | G            | 0.62 | -0.1536 | 0.0149 | 7.32E-25 | 1        |
| rs2861819  | 2   | 68489221       | C             | G            | 0.66 | 0.159   | 0.0159 | 1.40E-23 | 0.99     |
| rs13019043 | 2   | 68492786       | G             | A            | 0.66 | 0.159   | 0.0159 | 1.42E-23 | 0.99     |
| rs6546357  | 2   | 68379038       | A             | G            | 0.64 | 0.1567  | 0.0157 | 1.76E-23 | 1        |
| rs2608604  | 16  | 88849421       | G             | A            | 0.62 | -0.149  | 0.0149 | 1.79E-23 | 1        |
| rs4671205  | 2   | 68379388       | A             | G            | 0.64 | 0.1566  | 0.0157 | 1.83E-23 | 1        |
| rs10195757 | 2   | 68493582       | C             | T            | 0.66 | 0.1586  | 0.0159 | 1.89E-23 | 0.99     |
| rs6742014  | 2   | 68385955       | T             | C            | 0.64 | 0.1563  | 0.0157 | 2.11E-23 | 1        |
| rs6712038  | 2   | 68492887       | A             | G            | 0.66 | 0.1584  | 0.0159 | 2.18E-23 | 0.99     |
| rs12713637 | 2   | 68490970       | A             | T            | 0.66 | 0.1583  | 0.0159 | 2.32E-23 | 0.99     |
| rs6546366  | 2   | 68489667       | C             | A            | 0.66 | 0.1583  | 0.0159 | 2.37E-23 | 0.99     |
| rs6759433  | 2   | 68495463       | A             | G            | 0.66 | 0.1583  | 0.0159 | 2.46E-23 | 0.99     |
| rs6546368  | 2   | 68498832       | C             | T            | 0.66 | 0.1584  | 0.0159 | 2.67E-23 | 0.99     |
| rs7594568  | 2   | 68476861       | A             | G            | 0.66 | 0.158   | 0.0159 | 2.69E-23 | 1        |
| rs4671887  | 2   | 68475595       | A             | C            | 0.66 | 0.1579  | 0.0159 | 2.79E-23 | 1        |
| rs12468533 | 2   | 68457573       | T             | C            | 0.66 | 0.1579  | 0.0159 | 2.83E-23 | 1        |
| rs6546364  | 2   | 68475068       | A             | C            | 0.66 | 0.1579  | 0.0159 | 2.84E-23 | 1        |



|            |    |          |   |   |      |         |        |          |      |
|------------|----|----------|---|---|------|---------|--------|----------|------|
| rs4671888  | 2  | 68477248 | C | T | 0.66 | 0.1579  | 0.0159 | 2.87E-23 | 1    |
| rs7579440  | 2  | 68498508 | C | T | 0.66 | 0.1582  | 0.0159 | 2.90E-23 | 0.99 |
| rs1947025  | 2  | 68478919 | G | A | 0.66 | 0.1579  | 0.0159 | 2.96E-23 | 1    |
| rs2278788  | 2  | 68376556 | C | T | 0.64 | 0.1559  | 0.0157 | 3.02E-23 | 1    |
| rs6546363  | 2  | 68467910 | C | A | 0.66 | 0.1578  | 0.0159 | 3.10E-23 | 1    |
| rs5018482  | 2  | 68377612 | C | A | 0.64 | 0.1558  | 0.0157 | 3.33E-23 | 1    |
| rs12329083 | 2  | 68481719 | T | A | 0.66 | 0.1577  | 0.0159 | 3.34E-23 | 0.99 |
| rs7569914  | 2  | 68487109 | G | A | 0.66 | 0.1577  | 0.0159 | 3.37E-23 | 0.99 |
| rs1375371  | 2  | 68463612 | A | G | 0.66 | 0.1576  | 0.0159 | 3.51E-23 | 1    |
| rs6546362  | 2  | 68463321 | T | C | 0.66 | 0.1576  | 0.0159 | 3.51E-23 | 1    |
| rs6711175  | 2  | 68457280 | A | G | 0.66 | 0.1574  | 0.0159 | 3.68E-23 | 1    |
| rs7576010  | 2  | 68473457 | G | A | 0.66 | 0.1574  | 0.0159 | 3.76E-23 | 1    |
| rs10208241 | 2  | 68446936 | T | C | 0.65 | 0.1572  | 0.0159 | 3.90E-23 | 1    |
| rs6721447  | 2  | 68472242 | C | A | 0.66 | 0.1573  | 0.0159 | 4.02E-23 | 1    |
| rs930653   | 2  | 68464271 | T | A | 0.66 | 0.1573  | 0.0159 | 4.02E-23 | 1    |
| rs6546356  | 2  | 68369938 | T | C | 0.64 | 0.1553  | 0.0157 | 4.80E-23 | 1    |
| rs4671877  | 2  | 68399190 | T | C | 0.65 | 0.1567  | 0.0159 | 4.88E-23 | 1    |
| rs8052370  | 16 | 88837298 | T | C | 0.61 | -0.1482 | 0.015  | 5.49E-23 | 0.98 |
| rs12476697 | 2  | 68457854 | G | A | 0.66 | 0.1568  | 0.0159 | 5.89E-23 | 1    |
| rs6730444  | 2  | 68458420 | G | T | 0.66 | 0.1567  | 0.0159 | 5.93E-23 | 1    |
| rs12105301 | 2  | 68448365 | G | A | 0.66 | 0.1565  | 0.0159 | 6.24E-23 | 1    |
| rs10445033 | 16 | 88840462 | A | G | 0.61 | -0.1474 | 0.015  | 7.04E-23 | 0.99 |
| rs4671884  | 2  | 68448235 | G | A | 0.66 | 0.1562  | 0.0159 | 7.55E-23 | 1    |
| rs10191352 | 2  | 68418868 | T | A | 0.66 | 0.1561  | 0.0159 | 8.51E-23 | 1    |
| rs2122126  | 2  | 68417717 | C | A | 0.66 | 0.1561  | 0.0159 | 8.61E-23 | 1    |
| rs4671874  | 2  | 68355640 | C | G | 0.64 | 0.1548  | 0.0158 | 8.66E-23 | 0.99 |
| rs2044693  | 2  | 68385097 | G | A | 0.64 | 0.1544  | 0.0157 | 8.74E-23 | 1    |
| rs6761378  | 2  | 68420070 | T | G | 0.66 | 0.1561  | 0.0159 | 8.76E-23 | 1    |
| rs13004649 | 2  | 68425417 | A | G | 0.66 | 0.1561  | 0.0159 | 8.77E-23 | 1    |
| rs12713635 | 2  | 68423530 | A | G | 0.66 | 0.1561  | 0.0159 | 8.80E-23 | 1    |
| rs6757863  | 2  | 68419487 | A | G | 0.66 | 0.1561  | 0.0159 | 8.82E-23 | 1    |
| rs4671878  | 2  | 68422771 | A | G | 0.66 | 0.1561  | 0.0159 | 8.85E-23 | 1    |
| rs9677635  | 2  | 68421049 | A | G | 0.66 | 0.1561  | 0.0159 | 8.91E-23 | 1    |
| rs12052801 | 2  | 68423218 | A | G | 0.66 | 0.1561  | 0.0159 | 8.92E-23 | 1    |
| rs6719706  | 2  | 68429632 | T | C | 0.66 | 0.156   | 0.0159 | 9.04E-23 | 1    |
| rs11693063 | 2  | 68410372 | A | C | 0.66 | 0.1559  | 0.0159 | 9.41E-23 | 1    |
| rs6546358  | 2  | 68411414 | A | G | 0.66 | 0.1559  | 0.0159 | 9.45E-23 | 1    |
| rs1115793  | 2  | 68411962 | A | G | 0.66 | 0.1559  | 0.0159 | 9.52E-23 | 1    |
| rs6757991  | 2  | 68410660 | G | T | 0.66 | 0.1558  | 0.0159 | 9.62E-23 | 1    |
| rs7573449  | 2  | 68435932 | A | G | 0.66 | 0.1559  | 0.0159 | 9.94E-23 | 1    |
| rs6736178  | 2  | 68433831 | A | G | 0.66 | 0.1558  | 0.0159 | 1.08E-22 | 1    |
| rs12713636 | 2  | 68435431 | G | C | 0.66 | 0.1557  | 0.0159 | 1.09E-22 | 1    |
| rs7599591  | 2  | 68412906 | A | C | 0.66 | 0.1557  | 0.0159 | 1.11E-22 | 1    |
| rs6758449  | 2  | 68437108 | G | A | 0.66 | 0.1557  | 0.0159 | 1.14E-22 | 1    |
| rs6757906  | 2  | 68354727 | A | C | 0.64 | 0.1543  | 0.0158 | 1.17E-22 | 0.99 |

|            |    |          |   |   |       |         |        |          |      |
|------------|----|----------|---|---|-------|---------|--------|----------|------|
| rs6738957  | 2  | 68439960 | T | C | 0.66  | 0.1556  | 0.0159 | 1.18E-22 | 1    |
| rs7572554  | 2  | 68435280 | T | C | 0.66  | 0.1556  | 0.0159 | 1.19E-22 | 1    |
| rs7574378  | 2  | 68430925 | T | C | 0.66  | 0.1556  | 0.0159 | 1.19E-22 | 1    |
| rs7577586  | 2  | 68431259 | A | G | 0.66  | 0.1556  | 0.0159 | 1.20E-22 | 1    |
| rs2861815  | 2  | 68438829 | A | G | 0.66  | 0.1556  | 0.0159 | 1.20E-22 | 1    |
| rs2861816  | 2  | 68439237 | G | A | 0.66  | 0.1556  | 0.0159 | 1.21E-22 | 1    |
| rs2861814  | 2  | 68438614 | T | C | 0.66  | 0.1555  | 0.0159 | 1.23E-22 | 1    |
| rs10192179 | 2  | 68443835 | T | A | 0.66  | 0.1556  | 0.0159 | 1.24E-22 | 1    |
| rs4296409  | 2  | 68439168 | A | C | 0.66  | 0.1555  | 0.0159 | 1.25E-22 | 1    |
| rs10191980 | 2  | 68443651 | G | A | 0.66  | 0.1555  | 0.0159 | 1.25E-22 | 1    |
| rs3961804  | 2  | 68400098 | A | G | 0.66  | 0.1553  | 0.0159 | 1.37E-22 | 1    |
| rs10190515 | 2  | 68400956 | A | G | 0.66  | 0.1552  | 0.0159 | 1.41E-22 | 1    |
| rs12691190 | 2  | 68401557 | G | A | 0.66  | 0.1552  | 0.0159 | 1.43E-22 | 1    |
| rs1060842  | 2  | 68402012 | T | G | 0.66  | 0.1552  | 0.0159 | 1.44E-22 | 1    |
| rs8052231  | 16 | 88837243 | T | C | 0.6   | -0.1461 | 0.015  | 2.01E-22 | 0.98 |
| rs6716271  | 2  | 68398919 | C | G | 0.66  | 0.1547  | 0.0159 | 2.06E-22 | 1    |
| rs10197082 | 2  | 68402830 | C | G | 0.66  | 0.1547  | 0.0159 | 2.16E-22 | 0.99 |
| rs10173197 | 2  | 68402835 | G | A | 0.66  | 0.1547  | 0.0159 | 2.16E-22 | 0.99 |
| rs6753107  | 2  | 68360500 | G | A | 0.64  | 0.1532  | 0.0157 | 2.21E-22 | 0.99 |
| rs1037242  | 2  | 68404828 | A | G | 0.66  | 0.1544  | 0.0159 | 2.51E-22 | 1    |
| rs17035680 | 1  | 10825686 | C | T | 0.069 | 0.259   | 0.0267 | 3.03E-22 | 0.97 |
| rs6540949  | 1  | 10823873 | C | T | 0.82  | -0.1781 | 0.0184 | 3.10E-22 | 1    |
| rs12713633 | 2  | 68396196 | G | A | 0.66  | 0.1537  | 0.0159 | 3.92E-22 | 1    |
| rs6756198  | 2  | 68394184 | T | C | 0.66  | 0.1536  | 0.0159 | 4.22E-22 | 1    |
| rs6540950  | 1  | 10824329 | C | T | 0.82  | -0.1773 | 0.0184 | 4.46E-22 | 1    |
| rs10173501 | 2  | 68395631 | A | G | 0.66  | 0.153   | 0.0159 | 6.27E-22 | 1    |
| rs4671876  | 2  | 68395913 | G | A | 0.66  | 0.1529  | 0.0159 | 6.45E-22 | 1    |
| rs7340307  | 2  | 68393144 | A | T | 0.66  | 0.1528  | 0.0159 | 6.92E-22 | 1    |
| rs2902065  | 2  | 68482327 | G | A | 0.67  | 0.154   | 0.0161 | 9.22E-22 | 0.99 |
| rs10182832 | 2  | 68394984 | C | T | 0.66  | 0.1524  | 0.0159 | 9.59E-22 | 1    |
| rs205488   | 1  | 10827135 | C | T | 0.84  | -0.1826 | 0.0193 | 2.62E-21 | 0.99 |
| rs12709104 | 16 | 88757940 | A | G | 0.9   | -0.2125 | 0.0228 | 1.25E-20 | 0.98 |
| rs4671204  | 2  | 68354964 | T | C | 0.63  | 0.1452  | 0.0156 | 1.53E-20 | 0.99 |
| rs9972645  | 16 | 88796658 | G | A | 0.91  | -0.2217 | 0.0239 | 1.77E-20 | 0.99 |
| rs837763   | 16 | 88853729 | T | C | 0.55  | -0.1363 | 0.0147 | 2.00E-20 | 1    |
| rs11076698 | 16 | 88752693 | G | T | 0.91  | -0.2192 | 0.0237 | 2.31E-20 | 0.99 |
| rs8060579  | 16 | 88751667 | C | G | 0.91  | -0.2182 | 0.0237 | 3.29E-20 | 0.99 |
| rs7193436  | 16 | 88748736 | C | T | 0.91  | -0.2182 | 0.0237 | 3.74E-20 | 0.99 |
| rs551118   | 16 | 88856084 | G | C | 0.58  | -0.1379 | 0.015  | 4.04E-20 | 0.97 |
| rs6500488  | 16 | 88753865 | G | A | 0.91  | -0.2171 | 0.0236 | 4.06E-20 | 0.99 |
| rs7586731  | 2  | 68363899 | T | C | 0.64  | 0.1436  | 0.0156 | 4.08E-20 | 0.99 |
| rs7560014  | 2  | 68363903 | G | A | 0.64  | 0.1433  | 0.0156 | 4.97E-20 | 0.99 |
| rs2926776  | 16 | 88858602 | G | A | 0.58  | -0.1372 | 0.015  | 6.82E-20 | 0.96 |
| rs2968478  | 16 | 88858646 | G | T | 0.58  | -0.1365 | 0.015  | 1.11E-19 | 0.96 |
| rs11076699 | 16 | 88756812 | T | G | 0.91  | -0.2192 | 0.0242 | 1.24E-19 | 0.98 |

|            |    |           |   |   |      |         |        |          |      |
|------------|----|-----------|---|---|------|---------|--------|----------|------|
| rs745326   | 16 | 88755245  | G | C | 0.91 | -0.2172 | 0.0241 | 1.88E-19 | 0.98 |
| rs8060640  | 16 | 88744430  | C | G | 0.91 | -0.2123 | 0.0237 | 2.81E-19 | 1    |
| rs28558138 | 4  | 26818080  | C | G | 0.42 | -0.1353 | 0.0152 | 5.00E-19 | 0.98 |
| rs3826076  | 16 | 88780518  | G | A | 0.89 | -0.1976 | 0.0222 | 5.16E-19 | 1    |
| rs2306046  | 16 | 88781419  | G | A | 0.89 | -0.1973 | 0.0222 | 6.13E-19 | 1    |
| rs4238679  | 16 | 88742688  | C | G | 0.91 | -0.2108 | 0.0237 | 6.41E-19 | 1    |
| rs8050715  | 16 | 88780923  | G | C | 0.89 | -0.197  | 0.0222 | 6.49E-19 | 1    |
| rs8053350  | 16 | 88794403  | A | G | 0.56 | -0.1315 | 0.0148 | 6.78E-19 | 0.99 |
| rs8048897  | 16 | 88744470  | G | T | 0.91 | -0.2096 | 0.0237 | 8.72E-19 | 1    |
| rs7205626  | 16 | 88780472  | C | T | 0.89 | -0.1965 | 0.0222 | 8.76E-19 | 1    |
| rs8060966  | 16 | 88777329  | G | A | 0.89 | -0.1926 | 0.0218 | 9.68E-19 | 0.99 |
| rs6700327  | 1  | 10815673  | G | T | 0.85 | -0.1806 | 0.0204 | 1.00E-18 | 0.91 |
| rs2290902  | 16 | 88782676  | G | A | 0.89 | -0.1957 | 0.0222 | 1.16E-18 | 0.99 |
| rs861400   | 16 | 88862343  | G | C | 0.57 | -0.1322 | 0.015  | 1.42E-18 | 0.96 |
| rs4401037  | 16 | 88786967  | T | C | 0.89 | -0.1928 | 0.0219 | 1.44E-18 | 1    |
| rs8053135  | 16 | 88810129  | G | A | 0.88 | -0.1856 | 0.0212 | 1.77E-18 | 0.99 |
| rs4671892  | 2  | 68503920  | G | A | 0.68 | 0.143   | 0.0163 | 1.84E-18 | 0.97 |
| rs4433802  | 16 | 88784964  | G | A | 0.89 | -0.1933 | 0.0221 | 2.06E-18 | 0.99 |
| rs8043637  | 16 | 88781125  | C | T | 0.89 | -0.1929 | 0.0221 | 2.24E-18 | 0.99 |
| rs8044367  | 16 | 88783374  | G | A | 0.89 | -0.1932 | 0.0223 | 3.91E-18 | 1    |
| rs4597303  | 16 | 88763561  | C | T | 0.92 | -0.2131 | 0.0246 | 3.97E-18 | 0.98 |
| rs4598894  | 16 | 88776141  | A | G | 0.89 | -0.1914 | 0.0221 | 4.67E-18 | 1    |
| rs11076702 | 16 | 88774569  | C | A | 0.89 | -0.1915 | 0.0221 | 5.32E-18 | 0.99 |
| rs837756   | 16 | 88862568  | C | G | 0.58 | -0.1309 | 0.0151 | 5.33E-18 | 0.95 |
| rs6500491  | 16 | 88783521  | C | T | 0.89 | -0.1917 | 0.0223 | 7.36E-18 | 1    |
| rs4238685  | 16 | 88775220  | C | T | 0.89 | -0.1907 | 0.0222 | 7.73E-18 | 0.99 |
| rs11076701 | 16 | 88774525  | G | A | 0.89 | -0.1901 | 0.0221 | 8.12E-18 | 0.99 |
| rs3101725  | 5  | 127524018 | C | T | 0.76 | -0.1431 | 0.0167 | 8.93E-18 | 1    |
| rs4390574  | 16 | 88776297  | C | T | 0.89 | -0.1886 | 0.022  | 1.17E-17 | 1    |
| rs12991777 | 2  | 68351332  | C | T | 0.64 | 0.1339  | 0.0157 | 1.29E-17 | 0.99 |
| rs12928751 | 16 | 88864102  | C | T | 0.57 | -0.1285 | 0.0151 | 1.51E-17 | 0.96 |
| rs4782430  | 16 | 88792047  | G | A | 0.88 | -0.1818 | 0.0214 | 1.68E-17 | 1    |
| rs4782429  | 16 | 88792097  | G | A | 0.88 | -0.1817 | 0.0214 | 1.83E-17 | 1    |
| rs790154   | 5  | 127501235 | G | A | 0.76 | -0.1417 | 0.0167 | 1.96E-17 | 1    |
| rs790155   | 5  | 127498380 | T | C | 0.76 | -0.1416 | 0.0167 | 1.97E-17 | 1    |
| rs2861798  | 2  | 68349183  | G | T | 0.64 | 0.1327  | 0.0157 | 2.36E-17 | 1    |
| rs251393   | 5  | 127533085 | C | T | 0.78 | -0.1452 | 0.0172 | 2.87E-17 | 0.99 |
| rs2250127  | 5  | 127388844 | A | G | 0.25 | 0.1397  | 0.0165 | 3.16E-17 | 0.99 |
| rs1868402  | 2  | 68409037  | A | G | 0.71 | 0.141   | 0.0167 | 3.23E-17 | 1    |
| rs8048714  | 16 | 88809773  | C | G | 0.87 | -0.1741 | 0.0207 | 3.51E-17 | 0.99 |
| rs8059794  | 16 | 88787388  | T | C | 0.88 | -0.1786 | 0.0212 | 3.61E-17 | 1    |
| rs7201439  | 16 | 88808862  | T | C | 0.87 | -0.1739 | 0.0206 | 3.63E-17 | 1    |
| rs34576922 | 5  | 127364103 | G | C | 0.25 | 0.1393  | 0.0165 | 3.71E-17 | 0.99 |
| rs4238687  | 16 | 88788903  | G | T | 0.88 | -0.1787 | 0.0212 | 4.09E-17 | 1    |
| rs17764730 | 5  | 127357526 | T | C | 0.25 | 0.1392  | 0.0166 | 4.15E-17 | 0.99 |

|            |    |           |   |   |      |         |        |          |      |
|------------|----|-----------|---|---|------|---------|--------|----------|------|
| rs2340973  | 16 | 88773396  | A | G | 0.89 | -0.1872 | 0.0223 | 4.18E-17 | 0.99 |
| rs3749748  | 5  | 127350549 | T | C | 0.25 | 0.1391  | 0.0165 | 4.27E-17 | 0.99 |
| rs6888037  | 5  | 127406259 | T | G | 0.75 | -0.1387 | 0.0166 | 5.36E-17 | 0.99 |
| rs6860245  | 5  | 127367998 | C | G | 0.25 | 0.1385  | 0.0165 | 5.39E-17 | 0.99 |
| rs6500495  | 16 | 88808743  | G | A | 0.87 | -0.1724 | 0.0207 | 7.49E-17 | 1    |
| rs8043924  | 16 | 88787704  | C | G | 0.88 | -0.1764 | 0.0212 | 7.64E-17 | 1    |
| rs9935872  | 16 | 88788477  | G | A | 0.88 | -0.1769 | 0.0212 | 8.25E-17 | 1    |
| rs6734622  | 2  | 68350891  | G | A | 0.65 | 0.1302  | 0.0157 | 9.73E-17 | 1    |
| rs7599687  | 2  | 68348011  | T | C | 0.63 | 0.1284  | 0.0156 | 1.62E-16 | 0.99 |
| rs10445034 | 16 | 88840564  | T | C | 0.24 | -0.1489 | 0.0181 | 1.95E-16 | 0.98 |
| rs4520817  | 16 | 88785126  | G | A | 0.57 | -0.1209 | 0.0148 | 2.63E-16 | 1    |
| rs1108141  | 16 | 88841065  | G | T | 0.24 | -0.1465 | 0.0179 | 2.74E-16 | 0.98 |
| rs11135046 | 5  | 158230013 | T | G | 0.54 | -0.1203 | 0.0147 | 3.11E-16 | 1    |
| rs205485   | 1  | 10815702  | T | G | 0.11 | 0.1867  | 0.0229 | 3.15E-16 | 0.9  |
| rs4620939  | 16 | 88785072  | C | G | 0.57 | -0.1205 | 0.0148 | 3.26E-16 | 1    |
| rs8057031  | 16 | 88783449  | G | C | 0.56 | -0.1199 | 0.0147 | 3.50E-16 | 1    |
| rs1560637  | 5  | 127448066 | C | A | 0.75 | -0.135  | 0.0166 | 3.72E-16 | 1    |
| rs2617617  | 5  | 127455008 | T | C | 0.75 | -0.135  | 0.0166 | 3.77E-16 | 1    |
| rs9327468  | 5  | 127441861 | A | C | 0.75 | -0.135  | 0.0166 | 3.81E-16 | 1    |
| rs6889311  | 5  | 127431285 | G | A | 0.75 | -0.135  | 0.0166 | 3.81E-16 | 1    |
| rs1112956  | 5  | 127433798 | G | A | 0.75 | -0.135  | 0.0166 | 3.82E-16 | 1    |
| rs2409110  | 5  | 127433047 | T | A | 0.75 | -0.135  | 0.0166 | 3.84E-16 | 1    |
| rs2568928  | 5  | 127487603 | G | A | 0.76 | -0.1352 | 0.0166 | 3.94E-16 | 1    |
| rs7734927  | 5  | 127453735 | A | T | 0.75 | -0.1347 | 0.0166 | 4.34E-16 | 1    |
| rs1368298  | 5  | 158204425 | G | A | 0.45 | 0.1197  | 0.0147 | 4.36E-16 | 1    |
| rs1993878  | 5  | 127476971 | A | C | 0.75 | -0.1344 | 0.0166 | 5.22E-16 | 1    |
| rs8056374  | 16 | 88790147  | T | G | 0.88 | -0.1728 | 0.0213 | 5.35E-16 | 0.99 |
| rs12332693 | 5  | 158227898 | A | G | 0.55 | -0.1194 | 0.0147 | 5.48E-16 | 1    |
| rs31864    | 5  | 158220193 | G | A | 0.45 | 0.1189  | 0.0147 | 6.71E-16 | 1    |
| rs776912   | 1  | 10847784  | A | T | 0.83 | -0.1545 | 0.0192 | 7.43E-16 | 0.97 |
| rs7404939  | 16 | 88807896  | A | G | 0.12 | 0.1719  | 0.0213 | 7.66E-16 | 1    |
| rs1003136  | 5  | 127347815 | A | G | 0.36 | 0.1204  | 0.0151 | 1.38E-15 | 1    |
| rs28540272 | 5  | 127348899 | G | A | 0.37 | 0.1199  | 0.0151 | 1.64E-15 | 1    |
| rs34145453 | 5  | 127347013 | G | A | 0.37 | 0.1197  | 0.015  | 1.74E-15 | 1    |
| rs6500489  | 16 | 88772046  | C | T | 0.9  | -0.185  | 0.0233 | 1.84E-15 | 0.99 |
| rs17764688 | 5  | 127346879 | C | T | 0.37 | 0.1195  | 0.0151 | 2.18E-15 | 1    |
| rs7184427  | 16 | 88804734  | G | A | 0.85 | -0.1547 | 0.0196 | 2.59E-15 | 0.98 |
| rs67237947 | 16 | 88854779  | T | C | 0.23 | -0.1457 | 0.0185 | 2.86E-15 | 0.97 |
| rs1432679  | 5  | 158244083 | T | C | 0.55 | -0.1159 | 0.0147 | 3.56E-15 | 1    |
| rs4238686  | 16 | 88788934  | G | A | 0.53 | -0.1158 | 0.0147 | 3.88E-15 | 0.99 |
| rs2272443  | 16 | 88854008  | T | C | 0.23 | -0.1438 | 0.0184 | 5.15E-15 | 0.98 |
| rs4782432  | 16 | 88783738  | G | A | 0.88 | -0.1674 | 0.0215 | 6.25E-15 | 0.99 |
| rs8048125  | 16 | 88751207  | C | T | 0.68 | -0.12   | 0.0156 | 1.27E-14 | 0.99 |
| rs35897671 | 5  | 127349745 | T | C | 0.35 | 0.117   | 0.0152 | 1.58E-14 | 1    |
| rs11121627 | 1  | 10856692  | T | C | 0.59 | -0.1193 | 0.0156 | 1.79E-14 | 0.91 |

|            |    |           |   |   |       |         |        |          |      |
|------------|----|-----------|---|---|-------|---------|--------|----------|------|
| rs62048221 | 16 | 88846552  | T | C | 0.23  | -0.1388 | 0.0181 | 1.91E-14 | 1    |
| rs73251033 | 16 | 88844636  | A | G | 0.23  | -0.1392 | 0.0182 | 1.94E-14 | 1    |
| rs7773004  | 6  | 26267755  | G | A | 0.49  | -0.1125 | 0.0147 | 2.30E-14 | 1    |
| rs73251038 | 16 | 88845931  | T | C | 0.24  | -0.1354 | 0.0177 | 2.32E-14 | 1    |
| rs6933139  | 6  | 26327394  | T | A | 0.46  | -0.1132 | 0.0149 | 2.44E-14 | 1    |
| rs59404182 | 16 | 88852866  | G | A | 0.2   | -0.1483 | 0.0195 | 2.59E-14 | 0.97 |
| rs6456713  | 6  | 26325843  | G | A | 0.46  | -0.1128 | 0.0148 | 2.96E-14 | 1    |
| rs1053860  | 6  | 26325228  | T | C | 0.46  | -0.1128 | 0.0148 | 2.96E-14 | 1    |
| rs9393700  | 6  | 26309380  | A | G | 0.46  | -0.1127 | 0.0148 | 2.98E-14 | 1    |
| rs3778279  | 6  | 26325463  | C | T | 0.46  | -0.1128 | 0.0148 | 2.98E-14 | 1    |
| rs994379   | 6  | 26305407  | C | G | 0.46  | -0.1127 | 0.0148 | 3.04E-14 | 1    |
| rs251391   | 5  | 127538116 | T | C | 0.75  | -0.1253 | 0.0165 | 3.06E-14 | 0.99 |
| rs6917995  | 6  | 26327814  | C | T | 0.49  | -0.1121 | 0.0148 | 3.17E-14 | 1    |
| rs6932584  | 6  | 26327081  | C | A | 0.46  | -0.1126 | 0.0149 | 3.48E-14 | 0.99 |
| rs12929576 | 16 | 88749261  | C | T | 0.65  | -0.1152 | 0.0152 | 3.50E-14 | 0.99 |
| rs6932727  | 6  | 26327087  | A | C | 0.46  | -0.1126 | 0.0149 | 3.57E-14 | 0.99 |
| rs251390   | 5  | 127538346 | A | G | 0.75  | -0.125  | 0.0165 | 3.88E-14 | 0.99 |
| rs1155207  | 6  | 26328365  | G | A | 0.49  | -0.112  | 0.0148 | 3.92E-14 | 0.99 |
| rs251389   | 5  | 127541877 | C | A | 0.75  | -0.1247 | 0.0165 | 4.35E-14 | 1    |
| rs251216   | 5  | 127543280 | G | A | 0.75  | -0.1246 | 0.0165 | 4.38E-14 | 1    |
| rs2968482  | 16 | 88844433  | C | T | 0.3   | -0.1244 | 0.0165 | 4.67E-14 | 1    |
| rs2926770  | 16 | 88844527  | G | A | 0.3   | -0.1234 | 0.0165 | 6.50E-14 | 1    |
| rs72813547 | 16 | 88855969  | G | C | 0.17  | 0.1423  | 0.0191 | 9.61E-14 | 0.96 |
| rs7710925  | 5  | 158245634 | C | A | 0.6   | -0.11   | 0.0148 | 1.24E-13 | 1    |
| rs251214   | 5  | 127544738 | T | C | 0.74  | -0.121  | 0.0164 | 1.52E-13 | 1    |
| rs6658023  | 1  | 10847340  | C | T | 0.77  | -0.1249 | 0.0169 | 1.53E-13 | 0.99 |
| rs776911   | 1  | 10847158  | A | C | 0.77  | -0.1243 | 0.0169 | 1.86E-13 | 0.99 |
| rs79582484 | 16 | 88846218  | A | G | 0.26  | -0.127  | 0.0173 | 2.26E-13 | 1    |
| rs76327864 | 16 | 88849754  | A | G | 0.12  | -0.1744 | 0.0239 | 2.97E-13 | 0.99 |
| rs59096032 | 1  | 10838556  | A | C | 0.054 | 0.2152  | 0.0296 | 3.79E-13 | 1    |
| rs12077574 | 1  | 10829971  | A | G | 0.063 | 0.2048  | 0.0282 | 3.88E-13 | 0.98 |
| rs6500500  | 16 | 88829231  | G | A | 0.64  | -0.1106 | 0.0153 | 4.59E-13 | 0.98 |
| rs61459102 | 16 | 88847547  | A | C | 0.23  | -0.1298 | 0.0179 | 4.70E-13 | 1    |
| rs10864471 | 1  | 10849645  | G | A | 0.065 | 0.202   | 0.0279 | 4.74E-13 | 0.97 |
| rs61203850 | 16 | 88847516  | A | G | 0.23  | -0.1297 | 0.0179 | 4.89E-13 | 1    |
| rs6500486  | 16 | 88723629  | T | C | 0.13  | 0.1483  | 0.0205 | 4.91E-13 | 0.99 |
| rs56825100 | 16 | 88847343  | T | C | 0.23  | -0.1296 | 0.0179 | 5.07E-13 | 1    |
| rs4782309  | 16 | 88721538  | T | C | 0.13  | 0.148   | 0.0205 | 5.21E-13 | 1    |
| rs3923192  | 4  | 26819467  | G | A | 0.48  | -0.1075 | 0.0149 | 5.34E-13 | 0.98 |
| rs6500485  | 16 | 88723042  | A | G | 0.13  | 0.1474  | 0.0205 | 5.73E-13 | 1    |
| rs57258486 | 16 | 88847738  | A | G | 0.24  | -0.1293 | 0.0179 | 5.80E-13 | 1    |
| rs10056564 | 5  | 158261256 | T | C | 0.6   | -0.1069 | 0.0149 | 6.24E-13 | 1    |
| rs12625547 | 20 | 50154647  | G | T | 0.17  | -0.1466 | 0.0204 | 6.88E-13 | 0.99 |
| rs761124   | 1  | 10856053  | T | G | 0.8   | -0.1263 | 0.0176 | 7.79E-13 | 1    |
| rs8048658  | 16 | 88751528  | G | T | 0.7   | -0.1134 | 0.0158 | 8.11E-13 | 0.99 |

|            |    |           |   |   |      |         |        |          |      |
|------------|----|-----------|---|---|------|---------|--------|----------|------|
| rs1737617  | 1  | 10850798  | A | G | 0.78 | -0.123  | 0.0172 | 8.94E-13 | 1    |
| rs1152727  | 1  | 10857567  | C | A | 0.8  | -0.1268 | 0.0178 | 1.01E-12 | 0.99 |
| rs1152726  | 1  | 10857455  | C | T | 0.8  | -0.1263 | 0.0177 | 1.09E-12 | 0.99 |
| rs8046018  | 16 | 88719980  | T | G | 0.13 | 0.1459  | 0.0205 | 1.20E-12 | 1    |
| rs1017828  | 16 | 88720611  | A | G | 0.63 | -0.107  | 0.0151 | 1.27E-12 | 1    |
| rs6716006  | 2  | 68516891  | G | A | 0.7  | 0.116   | 0.0164 | 1.32E-12 | 1    |
| rs251387   | 5  | 127547180 | C | T | 0.74 | -0.1163 | 0.0164 | 1.32E-12 | 1    |
| rs1480333  | 16 | 88720678  | A | G | 0.63 | -0.1067 | 0.0151 | 1.42E-12 | 1    |
| rs4671894  | 2  | 68517936  | G | A | 0.7  | 0.1158  | 0.0164 | 1.44E-12 | 1    |
| rs236597   | 17 | 68235925  | T | C | 0.74 | -0.1167 | 0.0165 | 1.63E-12 | 0.98 |
| rs251213   | 5  | 127545605 | T | C | 0.74 | -0.1158 | 0.0164 | 1.68E-12 | 1    |
| rs181850   | 5  | 127547487 | C | T | 0.74 | -0.1157 | 0.0164 | 1.74E-12 | 1    |
| rs251386   | 5  | 127547298 | G | A | 0.74 | -0.1157 | 0.0164 | 1.75E-12 | 1    |
| rs2617621  | 5  | 127546266 | C | A | 0.74 | -0.1157 | 0.0164 | 1.76E-12 | 1    |
| rs185177   | 5  | 127547810 | G | A | 0.74 | -0.1157 | 0.0164 | 1.77E-12 | 1    |
| rs1292700  | 1  | 10850045  | G | T | 0.78 | -0.1203 | 0.0171 | 2.00E-12 | 1    |
| rs57374020 | 16 | 88847523  | C | T | 0.24 | -0.1259 | 0.0179 | 2.05E-12 | 1    |
| rs36693    | 5  | 127548700 | C | T | 0.74 | -0.115  | 0.0164 | 2.29E-12 | 1    |
| rs12935454 | 16 | 88721012  | A | G | 0.61 | -0.1046 | 0.015  | 2.65E-12 | 1    |
| rs3787184  | 20 | 50157837  | G | A | 0.17 | -0.1428 | 0.0204 | 2.82E-12 | 0.98 |
| rs11954193 | 5  | 158256118 | G | A | 0.6  | -0.1037 | 0.0149 | 3.01E-12 | 1    |
| rs236548   | 17 | 68231252  | A | G | 0.75 | -0.115  | 0.0165 | 3.38E-12 | 0.99 |
| rs236530   | 17 | 68217471  | T | C | 0.75 | -0.1154 | 0.0166 | 3.51E-12 | 0.98 |
| rs236533   | 17 | 68219033  | G | A | 0.75 | -0.1153 | 0.0166 | 3.57E-12 | 0.98 |
| rs7614922  | 3  | 128238222 | C | G | 0.14 | 0.1401  | 0.0202 | 3.67E-12 | 1    |
| rs10061900 | 5  | 158253542 | C | T | 0.6  | -0.1033 | 0.0149 | 3.83E-12 | 1    |
| rs17715000 | 5  | 158259583 | C | T | 0.6  | -0.1033 | 0.0149 | 3.85E-12 | 1    |
| rs57392066 | 5  | 158258461 | T | C | 0.6  | -0.1031 | 0.0149 | 4.08E-12 | 1    |
| rs35168311 | 5  | 158257533 | C | T | 0.6  | -0.1031 | 0.0149 | 4.14E-12 | 1    |
| rs36694    | 5  | 127548955 | A | C | 0.74 | -0.1135 | 0.0164 | 4.23E-12 | 1    |
| rs12926212 | 16 | 88719877  | G | C | 0.61 | -0.1036 | 0.015  | 4.48E-12 | 1    |
| rs10072741 | 5  | 158259024 | C | T | 0.6  | -0.1029 | 0.0149 | 4.60E-12 | 1    |
| rs10070743 | 5  | 158258048 | C | T | 0.6  | -0.1029 | 0.0149 | 4.65E-12 | 1    |
| rs17714952 | 5  | 158257153 | A | G | 0.6  | -0.1028 | 0.0149 | 4.67E-12 | 1    |
| rs1368297  | 5  | 158255046 | A | T | 0.6  | -0.1028 | 0.0149 | 4.69E-12 | 1    |
| rs10067225 | 5  | 158257355 | T | A | 0.6  | -0.1028 | 0.0149 | 4.71E-12 | 1    |
| rs10068867 | 5  | 158257560 | G | A | 0.6  | -0.1028 | 0.0149 | 4.73E-12 | 1    |
| rs55779000 | 5  | 158256616 | G | A | 0.6  | -0.1028 | 0.0149 | 4.77E-12 | 1    |
| rs9880192  | 3  | 128297569 | C | G | 0.41 | -0.1047 | 0.0151 | 4.82E-12 | 0.99 |
| rs6546370  | 2  | 68524491  | G | A | 0.69 | 0.1127  | 0.0163 | 4.94E-12 | 0.99 |
| rs11135047 | 5  | 158255975 | T | C | 0.6  | -0.1026 | 0.0149 | 5.05E-12 | 1    |
| rs6546355  | 2  | 68353300  | G | A | 0.72 | 0.1153  | 0.0167 | 5.18E-12 | 1    |
| rs10067607 | 5  | 158261475 | C | T | 0.6  | -0.1025 | 0.0149 | 5.61E-12 | 1    |
| rs236526   | 17 | 68214336  | T | A | 0.75 | -0.1145 | 0.0166 | 5.71E-12 | 0.98 |
| rs36700    | 5  | 127551273 | G | A | 0.74 | -0.1128 | 0.0164 | 5.88E-12 | 1    |

|            |    |           |   |   |      |         |        |          |      |
|------------|----|-----------|---|---|------|---------|--------|----------|------|
| rs36697    | 5  | 127549613 | G | A | 0.74 | -0.1127 | 0.0164 | 6.08E-12 | 1    |
| rs36698    | 5  | 127549749 | A | T | 0.74 | -0.1125 | 0.0164 | 6.63E-12 | 1    |
| rs11949842 | 5  | 158254804 | A | C | 0.6  | -0.102  | 0.0149 | 6.85E-12 | 1    |
| rs40527    | 5  | 127550252 | G | T | 0.74 | -0.1124 | 0.0164 | 6.99E-12 | 1    |
| rs2713575  | 3  | 128294355 | A | G | 0.5  | -0.1017 | 0.0148 | 7.38E-12 | 0.98 |
| rs11121617 | 1  | 10842021  | G | A | 0.26 | -0.1174 | 0.0172 | 8.25E-12 | 1    |
| rs152906   | 5  | 127551840 | C | T | 0.74 | -0.1117 | 0.0164 | 9.42E-12 | 1    |
| rs42916    | 5  | 127560659 | A | C | 0.74 | -0.1116 | 0.0164 | 1.00E-11 | 0.99 |
| rs36712    | 5  | 127561133 | C | G | 0.74 | -0.1117 | 0.0164 | 1.01E-11 | 0.99 |
| rs17715065 | 5  | 158261163 | T | C | 0.51 | -0.0996 | 0.0147 | 1.28E-11 | 1    |
| rs11646394 | 16 | 88812279  | A | C | 0.13 | -0.1566 | 0.0231 | 1.29E-11 | 0.99 |
| rs36711    | 5  | 127559833 | T | C | 0.74 | -0.1107 | 0.0164 | 1.32E-11 | 1    |
| rs6021277  | 20 | 50156873  | T | C | 0.46 | 0.0998  | 0.0148 | 1.36E-11 | 0.99 |
| rs13306296 | 16 | 88717957  | A | G | 0.37 | -0.1048 | 0.0156 | 1.65E-11 | 0.98 |
| rs236564   | 17 | 68237256  | T | G | 0.75 | -0.1113 | 0.0165 | 1.69E-11 | 0.99 |
| rs4704968  | 5  | 158264020 | G | A | 0.6  | -0.1001 | 0.0149 | 1.86E-11 | 1    |
| rs4782409  | 16 | 88803500  | C | G | 0.13 | -0.1552 | 0.0231 | 1.91E-11 | 0.99 |
| rs36706    | 5  | 127556698 | A | C | 0.74 | -0.1099 | 0.0164 | 1.94E-11 | 1    |
| rs4782413  | 16 | 88801770  | A | G | 0.13 | -0.1553 | 0.0232 | 2.01E-11 | 1    |
| rs2546147  | 5  | 127552590 | A | G | 0.74 | -0.1095 | 0.0163 | 2.01E-11 | 1    |
| rs36705    | 5  | 127554486 | G | A | 0.74 | -0.1096 | 0.0164 | 2.16E-11 | 1    |
| rs36710    | 5  | 127559444 | G | A | 0.74 | -0.1095 | 0.0164 | 2.22E-11 | 1    |
| rs36702    | 5  | 127552723 | A | T | 0.74 | -0.1094 | 0.0164 | 2.32E-11 | 1    |
| rs36714    | 5  | 127562531 | G | A | 0.74 | -0.1098 | 0.0164 | 2.39E-11 | 0.99 |
| rs3787185  | 20 | 50156198  | A | T | 0.46 | 0.0985  | 0.0147 | 2.42E-11 | 1    |
| rs36715    | 5  | 127562880 | A | G | 0.74 | -0.1096 | 0.0164 | 2.57E-11 | 0.99 |
| rs11649478 | 16 | 88800176  | T | G | 0.13 | -0.1543 | 0.0232 | 2.76E-11 | 0.99 |
| rs638538   | 17 | 68216128  | C | A | 0.73 | -0.1086 | 0.0163 | 2.93E-11 | 0.98 |
| rs36701    | 5  | 127552529 | T | C | 0.76 | -0.1122 | 0.0169 | 2.96E-11 | 1    |
| rs2617613  | 5  | 127552589 | A | G | 0.74 | -0.1086 | 0.0163 | 3.08E-11 | 1    |
| rs236567   | 17 | 68242546  | G | A | 0.75 | -0.1093 | 0.0165 | 3.81E-11 | 0.99 |
| rs1427933  | 5  | 158184710 | G | C | 0.37 | 0.0993  | 0.015  | 3.94E-11 | 1    |
| rs750739   | 16 | 88807608  | G | A | 0.17 | -0.1352 | 0.0205 | 4.52E-11 | 1    |
| rs1152728  | 1  | 10859513  | G | A | 0.71 | -0.1091 | 0.0166 | 4.97E-11 | 0.92 |
| rs11644443 | 16 | 88808872  | A | G | 0.17 | -0.1349 | 0.0205 | 5.10E-11 | 1    |
| rs31863    | 5  | 158220492 | G | A | 0.31 | 0.1023  | 0.0156 | 5.47E-11 | 1    |
| rs36713    | 5  | 127561432 | G | A | 0.77 | -0.1109 | 0.0169 | 6.02E-11 | 0.99 |
| rs2028667  | 2  | 68509748  | G | A | 0.65 | 0.1022  | 0.0156 | 6.35E-11 | 1    |
| rs790156   | 5  | 127491565 | A | G | 0.55 | -0.0962 | 0.0147 | 6.54E-11 | 1    |
| rs56158123 | 16 | 88797110  | G | C | 0.25 | -0.1145 | 0.0175 | 6.62E-11 | 0.99 |
| rs251217   | 5  | 127512064 | G | A | 0.54 | -0.0962 | 0.0147 | 6.79E-11 | 0.99 |
| rs11646193 | 16 | 88797307  | A | G | 0.25 | -0.1142 | 0.0175 | 7.17E-11 | 0.99 |
| rs73107980 | 12 | 48187601  | T | C | 0.24 | 0.1096  | 0.0168 | 7.61E-11 | 0.98 |
| rs2340981  | 16 | 88797471  | C | T | 0.25 | -0.114  | 0.0175 | 7.73E-11 | 0.99 |
| rs11549837 | 16 | 88779739  | G | A | 0.33 | -0.1031 | 0.0159 | 7.77E-11 | 1    |

|             |    |           |   |   |       |         |        |          |      |
|-------------|----|-----------|---|---|-------|---------|--------|----------|------|
| rs12102880  | 16 | 88796897  | T | G | 0.25  | -0.1139 | 0.0175 | 8.15E-11 | 0.99 |
| rs8062812   | 16 | 88814456  | T | C | 0.18  | -0.1298 | 0.02   | 8.94E-11 | 0.99 |
| rs2340983   | 16 | 88797628  | G | A | 0.25  | -0.114  | 0.0176 | 9.15E-11 | 0.99 |
| rs7469817   | 9  | 118296829 | C | G | 0.74  | 0.1121  | 0.0173 | 9.63E-11 | 1    |
| rs112759862 | 16 | 88814210  | A | G | 0.17  | -0.1307 | 0.0202 | 1.01E-10 | 0.99 |
| rs11645303  | 16 | 88814504  | A | G | 0.17  | -0.1308 | 0.0202 | 1.02E-10 | 0.99 |
| rs77376965  | 16 | 88800477  | A | G | 0.14  | -0.1417 | 0.0219 | 1.04E-10 | 1    |
| rs550269    | 16 | 88881635  | C | T | 0.85  | -0.1304 | 0.0202 | 1.09E-10 | 0.96 |
| rs3795239   | 3  | 128296223 | C | T | 0.44  | -0.0968 | 0.015  | 1.14E-10 | 0.98 |
| rs34908386  | 16 | 88800913  | T | C | 0.14  | -0.1413 | 0.0219 | 1.19E-10 | 1    |
| rs7469165   | 9  | 118296322 | C | G | 0.74  | 0.1113  | 0.0173 | 1.29E-10 | 1    |
| rs55924432  | 4  | 26812737  | T | C | 0.4   | -0.0974 | 0.0152 | 1.40E-10 | 0.99 |
| rs13325550  | 3  | 128260819 | C | G | 0.11  | 0.1421  | 0.0222 | 1.44E-10 | 1    |
| rs10124673  | 9  | 118286802 | T | C | 0.74  | 0.111   | 0.0173 | 1.46E-10 | 1    |
| rs17035713  | 1  | 10840905  | G | A | 0.056 | 0.195   | 0.0304 | 1.46E-10 | 0.95 |
| rs2027929   | 9  | 118297073 | G | A | 0.74  | 0.1111  | 0.0173 | 1.46E-10 | 1    |
| rs78905828  | 16 | 88802573  | A | G | 0.14  | -0.1402 | 0.0219 | 1.55E-10 | 1    |
| rs6021275   | 20 | 50155124  | G | A | 0.46  | 0.094   | 0.0147 | 1.56E-10 | 1    |
| rs73107993  | 12 | 48195873  | T | C | 0.25  | 0.1061  | 0.0166 | 1.59E-10 | 1    |
| rs916554    | 9  | 118288966 | C | T | 0.74  | 0.1108  | 0.0173 | 1.60E-10 | 1    |
| rs2241173   | 17 | 70028445  | G | A | 0.58  | -0.0948 | 0.0148 | 1.62E-10 | 0.99 |
| rs916555    | 9  | 118289168 | A | G | 0.74  | 0.1108  | 0.0173 | 1.62E-10 | 1    |
| rs11860864  | 16 | 88802830  | G | A | 0.14  | -0.1401 | 0.0219 | 1.65E-10 | 1    |
| rs7033287   | 9  | 118287525 | G | A | 0.74  | 0.1108  | 0.0173 | 1.65E-10 | 1    |
| rs36100417  | 16 | 88802511  | T | G | 0.14  | -0.1399 | 0.0219 | 1.66E-10 | 1    |
| rs113010486 | 16 | 88798398  | G | A | 0.15  | -0.1401 | 0.0219 | 1.69E-10 | 0.99 |
| rs6478181   | 9  | 118289606 | T | G | 0.74  | 0.1103  | 0.0173 | 1.97E-10 | 1    |
| rs816943    | 20 | 62676009  | G | A | 0.48  | -0.0943 | 0.0148 | 1.98E-10 | 0.99 |
| rs55726902  | 12 | 48196982  | A | G | 0.24  | 0.1063  | 0.0167 | 2.01E-10 | 1    |
| rs2001524   | 5  | 127443291 | G | A | 0.54  | -0.0935 | 0.0147 | 2.02E-10 | 1    |
| rs9922996   | 16 | 88800670  | C | G | 0.14  | -0.1393 | 0.0219 | 2.06E-10 | 1    |
| rs8079939   | 17 | 70032967  | T | G | 0.57  | -0.0943 | 0.0148 | 2.07E-10 | 0.99 |
| rs4782412   | 16 | 88802058  | G | A | 0.14  | -0.1391 | 0.0219 | 2.08E-10 | 1    |
| rs4428270   | 4  | 26793681  | C | A | 0.4   | -0.0963 | 0.0152 | 2.11E-10 | 1    |
| rs7692829   | 4  | 26822377  | A | G | 0.41  | -0.0962 | 0.0152 | 2.15E-10 | 0.99 |
| rs79366242  | 16 | 88802167  | G | C | 0.14  | -0.139  | 0.0219 | 2.17E-10 | 1    |
| rs3744316   | 17 | 70030138  | T | C | 0.58  | -0.0942 | 0.0148 | 2.20E-10 | 0.99 |
| rs35265318  | 16 | 88800785  | T | C | 0.14  | -0.139  | 0.0219 | 2.27E-10 | 1    |
| rs10067555  | 5  | 127427533 | C | T | 0.54  | -0.0932 | 0.0147 | 2.33E-10 | 1    |
| rs806100    | 5  | 127468177 | C | T | 0.54  | -0.0932 | 0.0147 | 2.34E-10 | 1    |
| rs28667801  | 4  | 26785356  | T | A | 0.41  | -0.0962 | 0.0152 | 2.38E-10 | 0.99 |
| rs9930994   | 16 | 88800693  | T | C | 0.14  | -0.1388 | 0.0219 | 2.39E-10 | 1    |
| rs4782322   | 16 | 88797669  | G | T | 0.15  | -0.1367 | 0.0216 | 2.70E-10 | 0.99 |
| rs8081315   | 17 | 70032555  | A | T | 0.57  | -0.0937 | 0.0148 | 2.70E-10 | 0.99 |
| rs10063647  | 5  | 127371588 | G | A | 0.48  | 0.0929  | 0.0147 | 2.71E-10 | 1    |



|             |    |           |   |   |      |         |        |          |      |
|-------------|----|-----------|---|---|------|---------|--------|----------|------|
| rs6887276   | 5  | 127378294 | G | C | 0.48 | 0.0929  | 0.0147 | 2.72E-10 | 1    |
| rs7856039   | 9  | 118385117 | C | T | 0.67 | 0.1008  | 0.016  | 2.74E-10 | 1    |
| rs809841    | 5  | 127460082 | G | A | 0.54 | -0.0928 | 0.0147 | 2.79E-10 | 1    |
| rs7405367   | 16 | 88814773  | T | C | 0.17 | -0.1296 | 0.0205 | 2.79E-10 | 0.97 |
| rs10039525  | 5  | 127453720 | T | C | 0.54 | -0.0927 | 0.0147 | 2.92E-10 | 1    |
| rs2544026   | 12 | 48186563  | A | T | 0.26 | 0.1043  | 0.0166 | 2.99E-10 | 0.99 |
| rs790153    | 5  | 127458770 | G | A | 0.54 | -0.0926 | 0.0147 | 3.03E-10 | 1    |
| rs1105315   | 5  | 127444321 | G | A | 0.54 | -0.0926 | 0.0147 | 3.06E-10 | 1    |
| rs7405368   | 16 | 88814776  | T | C | 0.17 | -0.1293 | 0.0206 | 3.16E-10 | 0.97 |
| rs35353288  | 16 | 88800814  | A | G | 0.14 | -0.1377 | 0.0219 | 3.20E-10 | 1    |
| rs6731373   | 2  | 68503044  | A | G | 0.36 | 0.0952  | 0.0152 | 3.30E-10 | 1    |
| rs13030605  | 2  | 68499651  | G | A | 0.27 | 0.1021  | 0.0162 | 3.33E-10 | 1    |
| rs13031571  | 2  | 68499827  | A | G | 0.27 | 0.1021  | 0.0162 | 3.35E-10 | 1    |
| rs4626681   | 9  | 118284335 | T | G | 0.67 | 0.1003  | 0.016  | 3.41E-10 | 1    |
| rs11168244  | 12 | 48202941  | T | C | 0.24 | 0.1055  | 0.0168 | 3.49E-10 | 0.99 |
| rs4979567   | 9  | 118383211 | G | A | 0.67 | 0.1002  | 0.016  | 3.49E-10 | 1    |
| rs35516283  | 4  | 26806736  | T | C | 0.4  | -0.0947 | 0.0151 | 3.65E-10 | 1    |
| rs236565    | 17 | 68237589  | C | T | 0.78 | -0.1091 | 0.0174 | 3.71E-10 | 0.97 |
| rs9302943   | 17 | 70034189  | T | A | 0.57 | -0.093  | 0.0148 | 3.71E-10 | 0.99 |
| rs11871949  | 17 | 70029448  | T | C | 0.57 | -0.0928 | 0.0148 | 3.86E-10 | 0.99 |
| rs56389811  | 12 | 48205358  | T | C | 0.24 | 0.1052  | 0.0168 | 3.92E-10 | 1    |
| rs11168250  | 12 | 48209165  | T | G | 0.24 | 0.1051  | 0.0168 | 3.93E-10 | 1    |
| rs7219056   | 17 | 70031856  | T | C | 0.57 | -0.0928 | 0.0148 | 3.96E-10 | 0.99 |
| rs7215105   | 17 | 70034963  | A | G | 0.57 | -0.0928 | 0.0148 | 4.00E-10 | 0.99 |
| rs35107212  | 4  | 26799390  | G | A | 0.4  | -0.0947 | 0.0151 | 4.13E-10 | 1    |
| rs7218051   | 17 | 70031984  | A | G | 0.57 | -0.0927 | 0.0148 | 4.16E-10 | 0.99 |
| rs776910    | 1  | 10846540  | G | A | 0.83 | -0.1176 | 0.0188 | 4.22E-10 | 1    |
| rs7216609   | 17 | 70035155  | T | C | 0.57 | -0.0927 | 0.0148 | 4.23E-10 | 0.99 |
| rs13009759  | 2  | 68496451  | A | G | 0.27 | 0.1017  | 0.0163 | 4.33E-10 | 1    |
| rs7217200   | 17 | 70035176  | G | A | 0.57 | -0.0926 | 0.0148 | 4.34E-10 | 0.99 |
| rs7662342   | 4  | 26805393  | A | G | 0.4  | -0.0946 | 0.0152 | 4.35E-10 | 1    |
| rs2058745   | 17 | 70035440  | T | C | 0.57 | -0.0926 | 0.0148 | 4.38E-10 | 0.99 |
| rs9898839   | 17 | 70034387  | G | C | 0.57 | -0.0926 | 0.0148 | 4.39E-10 | 0.99 |
| rs8081868   | 17 | 70033466  | G | C | 0.57 | -0.0925 | 0.0148 | 4.63E-10 | 0.99 |
| rs13148360  | 4  | 26797659  | A | G | 0.4  | -0.0945 | 0.0152 | 4.67E-10 | 1    |
| rs11168252  | 12 | 48210318  | A | T | 0.24 | 0.1046  | 0.0168 | 5.26E-10 | 0.99 |
| rs2058747   | 17 | 70035396  | A | G | 0.57 | -0.0921 | 0.0148 | 5.37E-10 | 0.99 |
| rs1061247   | 16 | 88781791  | C | A | 0.15 | -0.1317 | 0.0212 | 5.50E-10 | 1    |
| rs9299230   | 9  | 118388685 | C | A | 0.67 | 0.0991  | 0.016  | 5.61E-10 | 1    |
| rs61742623  | 16 | 88802748  | T | C | 0.14 | -0.1372 | 0.0221 | 5.61E-10 | 1    |
| rs11168245  | 12 | 48204499  | G | C | 0.24 | 0.1043  | 0.0168 | 5.63E-10 | 1    |
| rs112689589 | 12 | 48190269  | T | C | 0.23 | 0.1058  | 0.0171 | 5.64E-10 | 0.99 |
| rs9807105   | 17 | 70028838  | C | T | 0.57 | -0.0919 | 0.0148 | 5.69E-10 | 0.99 |
| rs11168251  | 12 | 48209663  | A | G | 0.24 | 0.1042  | 0.0168 | 5.74E-10 | 0.99 |
| rs776909    | 1  | 10845821  | C | A | 0.82 | -0.1157 | 0.0187 | 5.75E-10 | 0.99 |

|             |    |           |   |   |      |         |        |          |      |
|-------------|----|-----------|---|---|------|---------|--------|----------|------|
| rs4782321   | 16 | 88780175  | A | G | 0.15 | -0.1329 | 0.0214 | 5.83E-10 | 1    |
| rs7687234   | 4  | 26808829  | T | C | 0.4  | -0.0938 | 0.0152 | 5.97E-10 | 1    |
| rs776907    | 1  | 10845538  | A | T | 0.82 | -0.1155 | 0.0187 | 5.99E-10 | 0.99 |
| rs6478197   | 9  | 118391057 | C | T | 0.67 | 0.0989  | 0.016  | 6.03E-10 | 1    |
| rs4979570   | 9  | 118392208 | C | T | 0.67 | 0.0988  | 0.016  | 6.14E-10 | 1    |
| rs12994861  | 2  | 68494223  | T | C | 0.27 | 0.1006  | 0.0163 | 6.36E-10 | 1    |
| rs78579285  | 16 | 88813060  | T | C | 0.18 | -0.1215 | 0.0197 | 6.51E-10 | 1    |
| rs759495    | 17 | 70027021  | C | T | 0.57 | -0.0916 | 0.0148 | 6.53E-10 | 0.99 |
| rs2734047   | 3  | 128292844 | G | A | 0.63 | 0.0961  | 0.0156 | 6.62E-10 | 0.98 |
| rs4978645   | 9  | 118389134 | C | T | 0.67 | 0.0986  | 0.016  | 6.68E-10 | 1    |
| rs236569    | 17 | 68222505  | G | C | 0.71 | -0.0984 | 0.0159 | 6.70E-10 | 0.99 |
| rs11549835  | 16 | 88781073  | A | G | 0.15 | -0.1319 | 0.0214 | 6.71E-10 | 1    |
| rs776908    | 1  | 10845785  | G | A | 0.82 | -0.1151 | 0.0187 | 6.92E-10 | 0.99 |
| rs766406    | 6  | 26319588  | T | G | 0.63 | -0.0928 | 0.0151 | 7.34E-10 | 1    |
| rs4782320   | 16 | 88779865  | A | G | 0.15 | -0.1315 | 0.0214 | 8.07E-10 | 1    |
| rs74033390  | 16 | 88812708  | G | A | 0.19 | -0.1196 | 0.0195 | 8.17E-10 | 1    |
| rs12328417  | 2  | 68482210  | T | C | 0.27 | 0.1     | 0.0163 | 8.21E-10 | 1    |
| rs236527    | 17 | 68215574  | C | G | 0.7  | -0.098  | 0.016  | 8.66E-10 | 0.98 |
| rs13035506  | 2  | 68477609  | C | G | 0.27 | 0.0996  | 0.0163 | 9.34E-10 | 1    |
| rs13004394  | 2  | 68476547  | C | T | 0.27 | 0.0996  | 0.0163 | 9.47E-10 | 1    |
| rs4782399   | 16 | 88812682  | G | C | 0.19 | -0.1191 | 0.0195 | 9.68E-10 | 1    |
| rs875023    | 12 | 48194435  | T | C | 0.23 | 0.1039  | 0.017  | 9.77E-10 | 1    |
| rs2279258   | 16 | 88724347  | T | G | 0.65 | -0.0942 | 0.0154 | 9.78E-10 | 0.98 |
| rs111504162 | 16 | 88864897  | A | G | 0.14 | -0.1404 | 0.023  | 9.97E-10 | 0.96 |
| rs13013780  | 2  | 68472510  | C | T | 0.27 | 0.0994  | 0.0163 | 1.02E-09 | 1    |
| rs12473051  | 2  | 68461258  | C | G | 0.27 | 0.0994  | 0.0163 | 1.02E-09 | 1    |
| rs74033387  | 16 | 88811725  | T | C | 0.19 | -0.1188 | 0.0195 | 1.03E-09 | 1    |
| rs6731036   | 2  | 68437945  | G | C | 0.27 | 0.0995  | 0.0163 | 1.04E-09 | 1    |
| rs4671885   | 2  | 68468112  | C | G | 0.27 | 0.0993  | 0.0163 | 1.05E-09 | 1    |
| rs4671886   | 2  | 68468297  | C | T | 0.27 | 0.0993  | 0.0163 | 1.05E-09 | 1    |
| rs13028330  | 2  | 68446669  | T | C | 0.27 | 0.0994  | 0.0163 | 1.07E-09 | 1    |
| rs12997705  | 2  | 68462002  | T | A | 0.27 | 0.0993  | 0.0163 | 1.08E-09 | 1    |
| rs1443650   | 2  | 68466387  | A | T | 0.27 | 0.0992  | 0.0163 | 1.09E-09 | 1    |
| rs1443649   | 2  | 68466618  | C | T | 0.27 | 0.0992  | 0.0163 | 1.10E-09 | 1    |
| rs4671879   | 2  | 68422897  | G | T | 0.27 | 0.0992  | 0.0163 | 1.14E-09 | 1    |
| rs4671883   | 2  | 68441559  | T | C | 0.27 | 0.0993  | 0.0163 | 1.14E-09 | 1    |
| rs12995659  | 2  | 68373142  | T | C | 0.27 | 0.0991  | 0.0163 | 1.14E-09 | 1    |
| rs13013416  | 2  | 68465085  | C | T | 0.27 | 0.099   | 0.0163 | 1.17E-09 | 1    |
| rs77276646  | 16 | 88977193  | A | G | 0.18 | -0.1231 | 0.0202 | 1.19E-09 | 0.96 |
| rs1061238   | 16 | 88781850  | T | C | 0.15 | -0.13   | 0.0214 | 1.20E-09 | 1    |
| rs6546359   | 2  | 68418078  | G | C | 0.27 | 0.0991  | 0.0163 | 1.21E-09 | 1    |
| rs13003609  | 2  | 68423221  | C | T | 0.27 | 0.099   | 0.0163 | 1.24E-09 | 1    |
| rs7595076   | 2  | 68376253  | T | G | 0.27 | 0.0988  | 0.0163 | 1.25E-09 | 1    |
| rs10817804  | 9  | 118387316 | A | C | 0.66 | 0.096   | 0.0158 | 1.25E-09 | 1    |
| rs35636878  | 2  | 68420423  | G | T | 0.27 | 0.099   | 0.0163 | 1.25E-09 | 1    |

|             |    |           |   |   |       |         |        |          |      |
|-------------|----|-----------|---|---|-------|---------|--------|----------|------|
| rs7577500   | 2  | 68431296  | T | C | 0.27  | 0.099   | 0.0163 | 1.26E-09 | 1    |
| rs6750215   | 2  | 68433129  | C | T | 0.27  | 0.099   | 0.0163 | 1.27E-09 | 1    |
| rs4467549   | 4  | 26819519  | A | G | 0.4   | -0.0923 | 0.0152 | 1.27E-09 | 0.99 |
| rs7566066   | 2  | 68425049  | G | T | 0.27  | 0.0989  | 0.0163 | 1.29E-09 | 1    |
| rs13004407  | 2  | 68402652  | T | C | 0.27  | 0.0989  | 0.0163 | 1.31E-09 | 1    |
| rs7608984   | 2  | 68441258  | C | T | 0.27  | 0.0989  | 0.0163 | 1.33E-09 | 1    |
| rs6760646   | 2  | 68416529  | C | T | 0.27  | 0.0988  | 0.0163 | 1.33E-09 | 1    |
| rs12468156  | 2  | 68409670  | G | A | 0.27  | 0.0988  | 0.0163 | 1.34E-09 | 1    |
| rs13003580  | 2  | 68402360  | G | A | 0.27  | 0.0988  | 0.0163 | 1.34E-09 | 1    |
| rs3999543   | 6  | 26259807  | A | G | 0.29  | -0.1015 | 0.0168 | 1.36E-09 | 0.98 |
| rs12994570  | 2  | 68413348  | T | G | 0.27  | 0.0988  | 0.0163 | 1.36E-09 | 1    |
| rs13029910  | 2  | 68434345  | C | A | 0.27  | 0.0987  | 0.0163 | 1.42E-09 | 1    |
| rs35645227  | 2  | 68382038  | A | G | 0.27  | 0.0985  | 0.0163 | 1.44E-09 | 1    |
| rs113385327 | 16 | 88785242  | C | A | 0.15  | -0.1289 | 0.0213 | 1.45E-09 | 1    |
| rs13027276  | 2  | 68453291  | A | G | 0.27  | 0.0986  | 0.0163 | 1.47E-09 | 1    |
| rs79311053  | 16 | 88785206  | T | C | 0.15  | -0.1288 | 0.0213 | 1.50E-09 | 1    |
| rs10759810  | 9  | 118385164 | G | T | 0.66  | 0.0956  | 0.0158 | 1.52E-09 | 1    |
| rs6935954   | 6  | 26255451  | G | A | 0.58  | -0.0892 | 0.0148 | 1.57E-09 | 1    |
| rs7606087   | 2  | 68389919  | T | C | 0.27  | 0.0982  | 0.0163 | 1.57E-09 | 1    |
| rs1061539   | 6  | 29937555  | C | T | 0.83  | -0.1132 | 0.0188 | 1.59E-09 | 1    |
| rs17543640  | 5  | 158305076 | A | T | 0.39  | -0.092  | 0.0152 | 1.61E-09 | 1    |
| rs4671875   | 2  | 68381136  | G | C | 0.27  | 0.0982  | 0.0163 | 1.61E-09 | 1    |
| rs4671880   | 2  | 68428016  | C | T | 0.27  | 0.0983  | 0.0163 | 1.62E-09 | 1    |
| rs13030185  | 2  | 68425257  | C | T | 0.27  | 0.0983  | 0.0163 | 1.63E-09 | 1    |
| rs809871    | 6  | 26256526  | G | C | 0.58  | -0.0891 | 0.0148 | 1.63E-09 | 1    |
| rs2058744   | 17 | 70040308  | A | G | 0.6   | -0.09   | 0.0149 | 1.67E-09 | 0.99 |
| rs1065248   | 2  | 68458777  | C | T | 0.27  | 0.098   | 0.0163 | 1.69E-09 | 1    |
| rs3849280   | 1  | 10826619  | A | G | 0.035 | 0.2228  | 0.037  | 1.70E-09 | 0.97 |
| rs13183342  | 5  | 127502389 | C | T | 0.099 | 0.1423  | 0.0236 | 1.71E-09 | 0.98 |
| rs34842123  | 2  | 68356917  | C | T | 0.27  | 0.0982  | 0.0163 | 1.78E-09 | 0.99 |
| rs6062619   | 20 | 62683002  | G | A | 0.27  | -0.1042 | 0.0173 | 1.79E-09 | 0.96 |
| rs10169751  | 2  | 68394409  | T | C | 0.27  | 0.098   | 0.0163 | 1.80E-09 | 1    |
| rs10866709  | 5  | 158300126 | T | C | 0.39  | -0.0916 | 0.0152 | 1.85E-09 | 1    |
| rs12465372  | 2  | 68354213  | A | C | 0.27  | 0.0982  | 0.0163 | 1.88E-09 | 0.99 |
| rs9467703   | 6  | 26318903  | G | A | 0.63  | -0.0901 | 0.015  | 1.96E-09 | 1    |
| rs12713631  | 2  | 68391087  | G | A | 0.27  | 0.0978  | 0.0163 | 2.00E-09 | 1    |
| rs10153623  | 2  | 68390910  | T | G | 0.27  | 0.0977  | 0.0163 | 2.01E-09 | 1    |
| rs9393701   | 6  | 26309521  | C | T | 0.62  | -0.09   | 0.015  | 2.04E-09 | 1    |
| rs1549063   | 13 | 106264083 | T | A | 0.36  | 0.0907  | 0.0152 | 2.11E-09 | 1    |
| rs6899452   | 6  | 26307651  | C | T | 0.62  | -0.0899 | 0.015  | 2.11E-09 | 1    |
| rs4145910   | 6  | 26313305  | C | T | 0.63  | -0.0899 | 0.015  | 2.11E-09 | 1    |
| rs1549062   | 13 | 106264061 | A | G | 0.36  | 0.0907  | 0.0152 | 2.12E-09 | 1    |
| rs4772696   | 13 | 106264567 | G | A | 0.36  | 0.0907  | 0.0151 | 2.13E-09 | 1    |
| rs9461242   | 6  | 26314619  | C | T | 0.63  | -0.0899 | 0.015  | 2.13E-09 | 1    |
| rs4772697   | 13 | 106264893 | G | A | 0.36  | 0.0906  | 0.0151 | 2.18E-09 | 1    |

|             |    |           |   |   |         |         |        |          |      |
|-------------|----|-----------|---|---|---------|---------|--------|----------|------|
| rs766407    | 6  | 26319534  | C | T | 0.63    | -0.0898 | 0.015  | 2.20E-09 | 1    |
| rs10817792  | 9  | 118311318 | A | G | 0.74    | 0.1045  | 0.0175 | 2.34E-09 | 0.97 |
| rs11756673  | 6  | 26323505  | G | A | 0.63    | -0.0896 | 0.015  | 2.37E-09 | 1    |
| rs7582466   | 2  | 68390236  | G | A | 0.27    | 0.0971  | 0.0163 | 2.38E-09 | 1    |
| rs6062618   | 20 | 62682529  | G | T | 0.27    | -0.1017 | 0.017  | 2.40E-09 | 0.98 |
| rs2179152   | 6  | 26325888  | C | T | 0.63    | -0.0896 | 0.015  | 2.45E-09 | 1    |
| rs13009282  | 2  | 68364478  | C | T | 0.27    | 0.0966  | 0.0162 | 2.61E-09 | 1    |
| rs6939048   | 6  | 26327953  | A | G | 0.63    | -0.0896 | 0.015  | 2.62E-09 | 1    |
| rs1422798   | 5  | 158320877 | G | C | 0.38    | -0.0913 | 0.0153 | 2.67E-09 | 0.99 |
| rs7863684   | 9  | 118455827 | A | G | 0.094   | -0.1595 | 0.0268 | 2.72E-09 | 0.99 |
| rs1422797   | 5  | 158320876 | A | T | 0.38    | -0.0912 | 0.0153 | 2.79E-09 | 0.99 |
| rs7736883   | 5  | 158343969 | G | A | 0.38    | -0.0906 | 0.0153 | 3.01E-09 | 1    |
| rs76661599  | 16 | 88788544  | A | G | 0.15    | -0.1258 | 0.0212 | 3.05E-09 | 1    |
| rs8051150   | 16 | 88734904  | C | T | 0.65    | -0.0905 | 0.0153 | 3.09E-09 | 0.99 |
| rs3829494   | 16 | 88730007  | A | G | 0.58    | -0.088  | 0.0149 | 3.17E-09 | 0.99 |
| rs78759106  | 16 | 88788535  | C | T | 0.15    | -0.1257 | 0.0212 | 3.19E-09 | 1    |
| rs2712421   | 3  | 128287743 | T | G | 0.65    | 0.0927  | 0.0157 | 3.21E-09 | 1    |
| rs62385385  | 5  | 158367249 | A | T | 0.38    | -0.0904 | 0.0153 | 3.27E-09 | 1    |
| rs10982846  | 9  | 118378191 | T | G | 0.76    | 0.1039  | 0.0176 | 3.34E-09 | 1    |
| rs4997383   | 9  | 118378025 | C | T | 0.76    | 0.1038  | 0.0176 | 3.41E-09 | 1    |
| rs8050636   | 16 | 88898786  | T | C | 0.17    | -0.1218 | 0.0206 | 3.52E-09 | 0.97 |
| rs113907912 | 16 | 88793872  | C | T | 0.15    | -0.1269 | 0.0215 | 3.63E-09 | 0.98 |
| rs963115    | 9  | 118372937 | T | C | 0.76    | 0.1036  | 0.0176 | 3.68E-09 | 1    |
| rs6478196   | 9  | 118377417 | T | C | 0.76    | 0.1035  | 0.0176 | 3.75E-09 | 1    |
| rs3899074   | 9  | 118379101 | T | G | 0.76    | 0.1035  | 0.0176 | 3.80E-09 | 1    |
| rs7737500   | 5  | 158317804 | C | G | 0.39    | -0.0899 | 0.0153 | 3.92E-09 | 1    |
| rs10817803  | 9  | 118381411 | G | A | 0.65    | 0.0925  | 0.0157 | 4.09E-09 | 0.99 |
| rs205475    | 1  | 10833105  | A | G | 0.068   | 0.1628  | 0.0277 | 4.23E-09 | 0.99 |
| rs251388    | 5  | 127541903 | T | C | 0.51    | -0.0867 | 0.0148 | 4.25E-09 | 0.99 |
| rs7024456   | 9  | 118373854 | G | T | 0.76    | 0.1031  | 0.0176 | 4.28E-09 | 1    |
| rs11577258  | 1  | 10855315  | T | C | 0.055   | 0.1766  | 0.0301 | 4.31E-09 | 0.99 |
| rs4246910   | 9  | 118343998 | C | G | 0.75    | 0.1026  | 0.0175 | 4.35E-09 | 1    |
| rs16828263  | 3  | 118071923 | C | T | 0.00059 | 1.118   | 0.1905 | 4.37E-09 | 0.93 |
| rs7724989   | 5  | 158318147 | G | T | 0.38    | -0.0896 | 0.0153 | 4.47E-09 | 1    |
| rs7021677   | 9  | 118347088 | T | C | 0.75    | 0.1027  | 0.0175 | 4.49E-09 | 1    |
| rs1018845   | 9  | 118311164 | A | G | 0.6     | 0.089   | 0.0152 | 4.54E-09 | 1    |
| rs4645      | 6  | 26124634  | T | C | 0.22    | 0.1043  | 0.0178 | 4.55E-09 | 0.95 |
| rs4979562   | 9  | 118344685 | T | C | 0.75    | 0.1026  | 0.0175 | 4.56E-09 | 1    |
| rs62385377  | 5  | 158319479 | A | G | 0.38    | -0.0895 | 0.0153 | 4.64E-09 | 1    |
| rs112028717 | 16 | 88827338  | A | G | 0.15    | -0.129  | 0.022  | 4.67E-09 | 0.97 |
| rs7466771   | 9  | 118292629 | A | G | 0.76    | 0.103   | 0.0176 | 4.68E-09 | 1    |
| rs7186902   | 16 | 88735038  | C | A | 0.83    | -0.1109 | 0.0189 | 4.69E-09 | 0.98 |
| rs6762732   | 3  | 128292858 | C | T | 0.49    | 0.0869  | 0.0148 | 4.72E-09 | 0.98 |
| rs12713628  | 2  | 68377074  | G | A | 0.27    | 0.0951  | 0.0162 | 4.76E-09 | 1    |
| rs251215    | 5  | 127543622 | A | C | 0.51    | -0.0863 | 0.0147 | 4.77E-09 | 0.99 |

|            |    |           |   |   |       |         |        |          |      |
|------------|----|-----------|---|---|-------|---------|--------|----------|------|
| rs10116519 | 9  | 118381244 | T | C | 0.76  | 0.1028  | 0.0176 | 4.77E-09 | 1    |
| rs58007649 | 3  | 128289541 | A | G | 0.099 | 0.1375  | 0.0235 | 4.79E-09 | 1    |
| rs1422799  | 5  | 158321121 | G | C | 0.38  | -0.0894 | 0.0153 | 4.83E-09 | 1    |
| rs12929177 | 16 | 88736363  | G | A | 0.65  | -0.0894 | 0.0153 | 5.14E-09 | 0.99 |
| rs7858000  | 9  | 118302557 | G | T | 0.76  | 0.1025  | 0.0176 | 5.23E-09 | 1    |
| rs7027022  | 9  | 118311371 | A | G | 0.75  | 0.1021  | 0.0175 | 5.24E-09 | 1    |
| rs17543752 | 5  | 158332380 | C | T | 0.38  | -0.0892 | 0.0153 | 5.26E-09 | 1    |
| rs2418377  | 9  | 118338903 | C | G | 0.75  | 0.1021  | 0.0175 | 5.33E-09 | 1    |
| rs2188052  | 9  | 118295296 | C | T | 0.76  | 0.1026  | 0.0176 | 5.37E-09 | 1    |
| rs7026805  | 9  | 118311362 | T | C | 0.75  | 0.1019  | 0.0175 | 5.50E-09 | 1    |
| rs7470070  | 9  | 118402959 | T | A | 0.76  | 0.1024  | 0.0176 | 5.53E-09 | 1    |
| rs976499   | 9  | 118400853 | T | A | 0.76  | 0.1024  | 0.0176 | 5.61E-09 | 1    |
| rs6478180  | 9  | 118285411 | G | A | 0.75  | 0.1023  | 0.0176 | 5.63E-09 | 1    |
| rs12924566 | 16 | 88735044  | C | T | 0.83  | -0.1102 | 0.0189 | 5.64E-09 | 0.98 |
| rs2188053  | 9  | 118299750 | C | T | 0.76  | 0.1024  | 0.0176 | 5.71E-09 | 1    |
| rs4979551  | 9  | 118314193 | C | T | 0.75  | 0.1017  | 0.0175 | 5.82E-09 | 1    |
| rs6478191  | 9  | 118339551 | C | A | 0.75  | 0.1018  | 0.0175 | 5.83E-09 | 1    |
| rs10123924 | 9  | 118301290 | G | T | 0.76  | 0.1023  | 0.0176 | 5.94E-09 | 1    |
| rs1006008  | 9  | 118397066 | A | C | 0.76  | 0.1021  | 0.0176 | 5.99E-09 | 1    |
| rs4979550  | 9  | 118303147 | G | A | 0.76  | 0.1025  | 0.0176 | 6.04E-09 | 1    |
| rs752843   | 16 | 88769104  | T | C | 0.23  | 0.1027  | 0.0177 | 6.06E-09 | 0.93 |
| rs7468290  | 9  | 118316027 | G | T | 0.75  | 0.1016  | 0.0175 | 6.13E-09 | 1    |
| rs4979569  | 9  | 118391825 | A | C | 0.76  | 0.1019  | 0.0175 | 6.18E-09 | 1    |
| rs10982789 | 9  | 118309655 | T | A | 0.75  | 0.1016  | 0.0175 | 6.21E-09 | 1    |
| rs4246911  | 9  | 118393078 | T | A | 0.76  | 0.1019  | 0.0175 | 6.24E-09 | 1    |
| rs7466595  | 9  | 118305193 | T | C | 0.75  | 0.1016  | 0.0175 | 6.26E-09 | 1    |
| rs7855143  | 9  | 118393518 | T | C | 0.76  | 0.1019  | 0.0175 | 6.28E-09 | 1    |
| rs11999332 | 9  | 118315688 | A | T | 0.75  | 0.1015  | 0.0175 | 6.30E-09 | 1    |
| rs10759796 | 9  | 118320676 | A | T | 0.75  | 0.1015  | 0.0175 | 6.33E-09 | 1    |
| rs7469875  | 9  | 118320155 | T | C | 0.75  | 0.1015  | 0.0175 | 6.34E-09 | 1    |
| rs2734045  | 3  | 128292060 | A | G | 0.48  | 0.0859  | 0.0148 | 6.40E-09 | 0.99 |
| rs7469418  | 9  | 118305281 | C | T | 0.75  | 0.1015  | 0.0175 | 6.42E-09 | 1    |
| rs6478183  | 9  | 118308875 | C | T | 0.75  | 0.1015  | 0.0175 | 6.48E-09 | 1    |
| rs969832   | 9  | 118405048 | C | T | 0.76  | 0.102   | 0.0176 | 6.50E-09 | 0.99 |
| rs6478184  | 9  | 118310448 | A | C | 0.75  | 0.1014  | 0.0175 | 6.53E-09 | 1    |
| rs6478185  | 9  | 118310458 | T | C | 0.75  | 0.1014  | 0.0175 | 6.54E-09 | 1    |
| rs4546365  | 5  | 158267958 | T | C | 0.39  | -0.0885 | 0.0153 | 6.62E-09 | 0.99 |
| rs10759803 | 9  | 118331070 | T | C | 0.75  | 0.1014  | 0.0175 | 6.68E-09 | 1    |
| rs7029913  | 9  | 118311456 | G | A | 0.75  | 0.1013  | 0.0175 | 6.77E-09 | 1    |
| rs2106050  | 9  | 118326434 | C | G | 0.75  | 0.1013  | 0.0175 | 6.77E-09 | 1    |
| rs10817790 | 9  | 118311213 | T | C | 0.75  | 0.1013  | 0.0175 | 6.82E-09 | 1    |
| rs7467026  | 9  | 118310903 | C | A | 0.75  | 0.1013  | 0.0175 | 6.85E-09 | 1    |
| rs2418367  | 9  | 118329688 | G | A | 0.75  | 0.1013  | 0.0175 | 6.88E-09 | 1    |
| rs17643057 | 5  | 158274491 | G | A | 0.39  | -0.0881 | 0.0152 | 6.90E-09 | 1    |
| rs10817791 | 9  | 118311239 | C | T | 0.75  | 0.1012  | 0.0175 | 6.94E-09 | 1    |

|            |    |           |   |   |       |         |        |          |      |
|------------|----|-----------|---|---|-------|---------|--------|----------|------|
| rs2713571  | 3  | 128300998 | T | C | 0.3   | -0.0951 | 0.0164 | 6.98E-09 | 0.99 |
| rs7030481  | 9  | 118311629 | T | G | 0.75  | 0.1012  | 0.0175 | 7.06E-09 | 1    |
| rs3794624  | 16 | 88717074  | A | G | 0.36  | -0.0899 | 0.0155 | 7.12E-09 | 1    |
| rs7046356  | 9  | 118311498 | G | T | 0.75  | 0.1011  | 0.0175 | 7.17E-09 | 1    |
| rs718019   | 9  | 118312053 | C | T | 0.75  | 0.1011  | 0.0175 | 7.21E-09 | 1    |
| rs7707918  | 5  | 158270225 | C | A | 0.39  | -0.088  | 0.0152 | 7.27E-09 | 1    |
| rs7031849  | 9  | 118306898 | C | A | 0.67  | 0.092   | 0.0159 | 7.36E-09 | 1    |
| rs9719461  | 7  | 632715    | T | C | 0.66  | 0.0915  | 0.0158 | 7.36E-09 | 0.99 |
| rs891905   | 5  | 158267423 | C | T | 0.39  | -0.088  | 0.0152 | 7.45E-09 | 1    |
| rs10119624 | 9  | 118305438 | A | G | 0.67  | 0.0919  | 0.0159 | 7.56E-09 | 1    |
| rs10759791 | 9  | 118305735 | G | A | 0.67  | 0.0919  | 0.0159 | 7.57E-09 | 1    |
| rs7043680  | 9  | 118307518 | A | G | 0.67  | 0.0919  | 0.0159 | 7.60E-09 | 1    |
| rs7470033  | 9  | 118328537 | C | T | 0.68  | 0.0928  | 0.0161 | 7.77E-09 | 1    |
| rs78465403 | 16 | 88833116  | G | A | 0.14  | -0.1287 | 0.0223 | 7.78E-09 | 0.97 |
| rs10124057 | 9  | 118333897 | G | A | 0.75  | 0.1009  | 0.0175 | 7.86E-09 | 1    |
| rs2418393  | 9  | 118390987 | A | G | 0.76  | 0.1012  | 0.0175 | 8.02E-09 | 1    |
| rs61045787 | 5  | 158290225 | T | C | 0.39  | -0.0876 | 0.0152 | 8.31E-09 | 1    |
| rs4594837  | 5  | 158267974 | C | A | 0.39  | -0.0879 | 0.0153 | 8.34E-09 | 0.99 |
| rs2263321  | 6  | 31340908  | A | G | 0.33  | -0.0905 | 0.0157 | 8.42E-09 | 1.02 |
| rs4413606  | 6  | 26338257  | G | A | 0.63  | -0.0874 | 0.0152 | 8.44E-09 | 0.98 |
| rs247749   | 5  | 76296735  | C | T | 0.29  | 0.0987  | 0.0172 | 8.77E-09 | 0.86 |
| rs4978643  | 9  | 118303464 | G | A | 0.67  | 0.0918  | 0.016  | 8.79E-09 | 0.99 |
| rs4145474  | 9  | 118166976 | A | G | 0.51  | 0.085   | 0.0148 | 8.94E-09 | 0.99 |
| rs2544030  | 12 | 48195451  | A | G | 0.27  | 0.0932  | 0.0162 | 8.96E-09 | 1    |
| rs9861608  | 3  | 128283469 | T | C | 0.097 | 0.1366  | 0.0238 | 9.00E-09 | 0.99 |
| rs6500501  | 16 | 88829416  | G | A | 0.69  | -0.0912 | 0.0159 | 9.21E-09 | 0.97 |
| rs17715535 | 5  | 158269734 | A | G | 0.39  | -0.0874 | 0.0152 | 9.50E-09 | 1    |
| rs62385360 | 5  | 158269591 | T | C | 0.39  | -0.0873 | 0.0152 | 9.76E-09 | 1    |
| rs7635966  | 3  | 128220224 | A | G | 0.8   | -0.1049 | 0.0183 | 9.81E-09 | 0.95 |
| rs2072495  | 5  | 158296996 | T | C | 0.39  | -0.0871 | 0.0152 | 9.92E-09 | 1    |
| rs10052777 | 5  | 158269081 | C | T | 0.39  | -0.0872 | 0.0152 | 1.01E-08 | 1    |
| rs891904   | 5  | 158267473 | A | G | 0.39  | -0.0872 | 0.0152 | 1.01E-08 | 1    |
| rs6875710  | 5  | 158268426 | T | C | 0.39  | -0.0871 | 0.0152 | 1.04E-08 | 1    |
| rs4979554  | 9  | 118314378 | G | A | 0.68  | 0.0919  | 0.0161 | 1.05E-08 | 1    |
| rs75522736 | 6  | 135015921 | G | A | 0.16  | -0.1197 | 0.0209 | 1.07E-08 | 1    |
| rs4979552  | 9  | 118314283 | G | A | 0.68  | 0.0918  | 0.0161 | 1.08E-08 | 1    |
| rs7600326  | 2  | 68518280  | T | C | 0.62  | 0.0875  | 0.0153 | 1.09E-08 | 1    |
| rs4420519  | 16 | 88734268  | G | A | 0.64  | -0.0863 | 0.0151 | 1.11E-08 | 1    |
| rs7856953  | 9  | 118314930 | G | T | 0.68  | 0.0917  | 0.0161 | 1.13E-08 | 1    |
| rs72643233 | 1  | 10851035  | G | A | 0.12  | 0.1226  | 0.0215 | 1.13E-08 | 0.99 |
| rs7856947  | 9  | 118314920 | C | T | 0.68  | 0.0917  | 0.0161 | 1.13E-08 | 1    |
| rs58141054 | 6  | 135016942 | A | T | 0.16  | -0.1193 | 0.0209 | 1.20E-08 | 1    |
| rs9408866  | 9  | 118206082 | A | G | 0.13  | -0.1321 | 0.0232 | 1.21E-08 | 1    |
| rs2418363  | 9  | 118322434 | G | A | 0.68  | 0.0915  | 0.0161 | 1.24E-08 | 1    |
| rs1549061  | 13 | 106263705 | C | T | 0.35  | 0.0868  | 0.0152 | 1.24E-08 | 1    |

|             |    |           |   |   |         |        |        |          |      |
|-------------|----|-----------|---|---|---------|--------|--------|----------|------|
| rs2544029   | 12 | 48194957  | T | C | 0.27    | 0.0922 | 0.0162 | 1.25E-08 | 1    |
| rs2418362   | 9  | 118322429 | C | T | 0.68    | 0.0914 | 0.0161 | 1.27E-08 | 1    |
| rs2418361   | 9  | 118322396 | A | G | 0.68    | 0.0914 | 0.0161 | 1.28E-08 | 1    |
| rs12353511  | 9  | 118323278 | A | G | 0.68    | 0.0913 | 0.0161 | 1.29E-08 | 1    |
| rs2188063   | 9  | 118318597 | C | T | 0.68    | 0.0913 | 0.0161 | 1.30E-08 | 1    |
| rs10114683  | 9  | 118324383 | T | C | 0.68    | 0.0913 | 0.0161 | 1.31E-08 | 1    |
| rs10982798  | 9  | 118315559 | A | C | 0.68    | 0.0913 | 0.0161 | 1.31E-08 | 1    |
| rs12005078  | 9  | 118315641 | T | C | 0.68    | 0.0913 | 0.0161 | 1.31E-08 | 1    |
| rs553399706 | 16 | 74615577  | A | G | 0.00066 | 1.0645 | 0.1873 | 1.32E-08 | 0.92 |
| rs7467339   | 9  | 118320043 | G | T | 0.68    | 0.0913 | 0.0161 | 1.32E-08 | 1    |
| rs10817794  | 9  | 118317780 | A | G | 0.68    | 0.0913 | 0.0161 | 1.32E-08 | 1    |
| rs7470877   | 9  | 118316238 | A | G | 0.68    | 0.0913 | 0.0161 | 1.32E-08 | 1    |
| rs10817793  | 9  | 118316396 | T | C | 0.68    | 0.0913 | 0.0161 | 1.32E-08 | 1    |
| rs2157669   | 9  | 118316990 | C | T | 0.68    | 0.0913 | 0.0161 | 1.32E-08 | 1    |
| rs2040481   | 9  | 118316627 | G | C | 0.68    | 0.0913 | 0.0161 | 1.33E-08 | 1    |
| rs10759794  | 9  | 118318205 | G | T | 0.68    | 0.0912 | 0.0161 | 1.33E-08 | 1    |
| rs2188064   | 9  | 118318695 | T | C | 0.68    | 0.0912 | 0.0161 | 1.33E-08 | 1    |
| rs10759797  | 9  | 118320706 | A | G | 0.68    | 0.0912 | 0.0161 | 1.33E-08 | 1    |
| rs2418359   | 9  | 118319318 | G | A | 0.68    | 0.0912 | 0.0161 | 1.34E-08 | 1    |
| rs10739448  | 9  | 118320986 | A | G | 0.68    | 0.0912 | 0.0161 | 1.34E-08 | 1    |
| rs6478187   | 9  | 118321889 | C | A | 0.68    | 0.0912 | 0.0161 | 1.35E-08 | 1    |
| rs10117360  | 9  | 118327978 | T | C | 0.68    | 0.0912 | 0.0161 | 1.35E-08 | 1    |
| rs10118599  | 9  | 118317145 | C | A | 0.68    | 0.0912 | 0.0161 | 1.36E-08 | 1    |
| rs62512472  | 8  | 87595590  | A | G | 0.43    | 0.0843 | 0.0148 | 1.38E-08 | 0.99 |
| rs2418373   | 9  | 118330039 | C | T | 0.68    | 0.0911 | 0.0161 | 1.38E-08 | 1    |
| rs10759793  | 9  | 118316516 | C | A | 0.68    | 0.0912 | 0.0161 | 1.39E-08 | 1    |
| rs7466470   | 9  | 118327574 | G | A | 0.68    | 0.0911 | 0.0161 | 1.40E-08 | 1    |
| rs10114731  | 9  | 118324412 | C | G | 0.68    | 0.0911 | 0.0161 | 1.40E-08 | 1    |
| rs2213925   | 9  | 118323098 | C | T | 0.68    | 0.0911 | 0.0161 | 1.41E-08 | 1    |
| rs2188069   | 9  | 118323060 | G | A | 0.68    | 0.0911 | 0.0161 | 1.41E-08 | 1    |
| rs2106049   | 9  | 118326283 | A | G | 0.68    | 0.0911 | 0.0161 | 1.41E-08 | 1    |
| rs10739451  | 9  | 118324640 | T | C | 0.68    | 0.0911 | 0.0161 | 1.42E-08 | 1    |
| rs10120633  | 9  | 118327911 | C | T | 0.68    | 0.0911 | 0.0161 | 1.42E-08 | 1    |
| rs10759804  | 9  | 118331418 | G | A | 0.68    | 0.0911 | 0.0161 | 1.42E-08 | 1    |
| rs10116419  | 9  | 118326565 | T | C | 0.68    | 0.0911 | 0.0161 | 1.42E-08 | 1    |
| rs10117874  | 9  | 118324536 | C | T | 0.68    | 0.0911 | 0.0161 | 1.42E-08 | 1    |
| rs6478188   | 9  | 118325276 | C | G | 0.68    | 0.091  | 0.0161 | 1.43E-08 | 1    |
| rs584768    | 19 | 49213284  | A | G | 0.53    | 0.0842 | 0.0149 | 1.43E-08 | 1    |
| rs7469908   | 9  | 118327349 | A | G | 0.68    | 0.091  | 0.0161 | 1.43E-08 | 1    |
| rs10739452  | 9  | 118324729 | C | T | 0.68    | 0.091  | 0.0161 | 1.43E-08 | 1    |
| rs2418366   | 9  | 118329681 | T | C | 0.68    | 0.091  | 0.0161 | 1.43E-08 | 1    |
| rs2418369   | 9  | 118329724 | A | G | 0.68    | 0.091  | 0.0161 | 1.43E-08 | 1    |
| rs2188057   | 9  | 118311929 | A | G | 0.68    | 0.0911 | 0.0161 | 1.43E-08 | 1    |
| rs10759799  | 9  | 118324749 | C | T | 0.68    | 0.091  | 0.0161 | 1.44E-08 | 1    |
| rs2157665   | 9  | 118326058 | C | T | 0.68    | 0.091  | 0.0161 | 1.45E-08 | 1    |

|             |    |           |   |   |          |         |        |          |      |
|-------------|----|-----------|---|---|----------|---------|--------|----------|------|
| rs2452170   | 19 | 49213504  | A | G | 0.53     | 0.0842  | 0.0149 | 1.46E-08 | 1    |
| rs7470007   | 9  | 118328467 | C | T | 0.68     | 0.091   | 0.0161 | 1.46E-08 | 1    |
| rs10121361  | 9  | 118328288 | C | T | 0.68     | 0.091   | 0.0161 | 1.46E-08 | 1    |
| rs10739454  | 9  | 118330643 | C | T | 0.68     | 0.0909  | 0.0161 | 1.49E-08 | 1    |
| rs2418372   | 9  | 118329974 | G | A | 0.68     | 0.0909  | 0.0161 | 1.56E-08 | 1    |
| rs2213922   | 9  | 118325574 | G | A | 0.68     | 0.0908  | 0.0161 | 1.59E-08 | 1    |
| rs2638282   | 19 | 49213833  | A | G | 0.53     | 0.0839  | 0.0149 | 1.59E-08 | 1    |
| rs9409154   | 9  | 118202716 | C | T | 0.13     | -0.1311 | 0.0232 | 1.66E-08 | 1    |
| rs281377    | 19 | 49206603  | T | C | 0.43     | -0.0847 | 0.015  | 1.68E-08 | 1    |
| rs676388    | 19 | 49211969  | C | T | 0.53     | 0.0837  | 0.0148 | 1.73E-08 | 1    |
| rs36695     | 5  | 127549187 | A | G | 0.5      | -0.0829 | 0.0147 | 1.75E-08 | 1    |
| rs6914876   | 6  | 135014966 | A | G | 0.16     | -0.1176 | 0.0209 | 1.78E-08 | 1    |
| rs7752010   | 6  | 135015122 | G | A | 0.16     | -0.1177 | 0.0209 | 1.78E-08 | 1    |
| rs12491576  | 3  | 128308113 | G | A | 0.29     | -0.0928 | 0.0165 | 1.79E-08 | 1    |
| rs9491696   | 6  | 127452639 | G | C | 0.5      | -0.0829 | 0.0147 | 1.82E-08 | 1    |
| rs10504825  | 8  | 87567848  | C | A | 0.41     | 0.0836  | 0.0149 | 1.84E-08 | 1    |
| rs544034    | 16 | 88909376  | T | C | 0.2      | -0.1088 | 0.0193 | 1.88E-08 | 0.97 |
| rs6569963   | 6  | 135015049 | G | A | 0.16     | -0.1173 | 0.0209 | 1.90E-08 | 1    |
| rs75935779  | 3  | 118044978 | T | A | 6.00E-04 | 1.0775  | 0.1918 | 1.93E-08 | 0.93 |
| rs11577305  | 1  | 10855638  | G | C | 0.056    | 0.1677  | 0.0298 | 1.94E-08 | 1    |
| rs9494035   | 6  | 135013117 | A | T | 0.16     | -0.1173 | 0.0209 | 1.95E-08 | 1    |
| rs10817802  | 9  | 118362166 | A | G | 0.74     | 0.0969  | 0.0173 | 1.99E-08 | 1    |
| rs62512471  | 8  | 87593079  | C | T | 0.41     | 0.0835  | 0.0149 | 2.01E-08 | 1    |
| rs10982794  | 9  | 118312655 | G | T | 0.31     | 0.0881  | 0.0157 | 2.02E-08 | 0.99 |
| rs62510852  | 8  | 87585908  | G | C | 0.41     | 0.0834  | 0.0149 | 2.04E-08 | 1    |
| rs10118264  | 9  | 118484799 | G | T | 0.081    | -0.1606 | 0.0287 | 2.11E-08 | 0.99 |
| rs7767726   | 6  | 135016316 | C | G | 0.16     | -0.1169 | 0.0209 | 2.17E-08 | 1    |
| rs9482771   | 6  | 127446610 | C | G | 0.5      | -0.0824 | 0.0147 | 2.19E-08 | 1    |
| rs12002061  | 9  | 118485479 | C | T | 0.081    | -0.1603 | 0.0287 | 2.22E-08 | 0.99 |
| rs36696     | 5  | 127549576 | T | G | 0.5      | -0.0823 | 0.0147 | 2.24E-08 | 1    |
| rs7467728   | 9  | 118372026 | T | C | 0.75     | 0.0967  | 0.0173 | 2.26E-08 | 1    |
| rs115634775 | 4  | 26702526  | T | C | 0.062    | 0.1632  | 0.0292 | 2.27E-08 | 0.96 |
| rs510862    | 16 | 88872511  | C | T | 0.78     | -0.0986 | 0.0177 | 2.30E-08 | 0.95 |
| rs35709454  | 9  | 118469852 | G | C | 0.081    | -0.1601 | 0.0287 | 2.33E-08 | 0.99 |
| rs34395873  | 9  | 118469300 | C | T | 0.081    | -0.1601 | 0.0287 | 2.33E-08 | 0.99 |
| rs36699     | 5  | 127551261 | T | G | 0.5      | -0.0821 | 0.0147 | 2.35E-08 | 1    |
| rs2188067   | 9  | 118371019 | C | A | 0.75     | 0.0965  | 0.0173 | 2.36E-08 | 1    |
| rs12338936  | 9  | 118481042 | A | G | 0.081    | -0.16   | 0.0287 | 2.36E-08 | 0.99 |
| rs2058740   | 17 | 70040660  | A | G | 0.59     | -0.0832 | 0.0149 | 2.37E-08 | 1    |
| rs34637389  | 6  | 26377991  | G | C | 0.14     | 0.1136  | 0.0203 | 2.38E-08 | 0.98 |
| rs10125656  | 9  | 118483185 | A | G | 0.081    | -0.16   | 0.0287 | 2.39E-08 | 0.99 |
| rs12344772  | 9  | 118490315 | T | G | 0.081    | -0.1607 | 0.0288 | 2.40E-08 | 0.99 |
| rs11650401  | 17 | 70037444  | A | G | 0.59     | -0.083  | 0.0149 | 2.41E-08 | 1    |
| rs2089657   | 2  | 30470178  | T | C | 0.21     | -0.1039 | 0.0186 | 2.41E-08 | 0.99 |
| rs2713587   | 3  | 128290848 | G | A | 0.48     | 0.0822  | 0.0147 | 2.43E-08 | 1    |



|             |    |           |   |   |          |         |        |          |      |
|-------------|----|-----------|---|---|----------|---------|--------|----------|------|
| rs12603032  | 17 | 70037793  | G | T | 0.59     | -0.0829 | 0.0149 | 2.43E-08 | 1    |
| rs11077593  | 17 | 70037826  | T | A | 0.59     | -0.0829 | 0.0149 | 2.49E-08 | 1    |
| rs7590842   | 2  | 68531813  | C | T | 0.7      | 0.0928  | 0.0166 | 2.49E-08 | 0.97 |
| rs2342302   | 17 | 70036546  | A | G | 0.6      | -0.0833 | 0.0149 | 2.54E-08 | 1    |
| rs11121624  | 1  | 10850371  | A | G | 0.13     | 0.1182  | 0.0212 | 2.55E-08 | 1    |
| rs2290116   | 2  | 68365561  | C | T | 0.23     | 0.0952  | 0.0171 | 2.56E-08 | 1    |
| rs759493    | 17 | 70036558  | T | C | 0.6      | -0.0832 | 0.015  | 2.67E-08 | 1    |
| rs7766106   | 6  | 127455138 | T | C | 0.5      | -0.0818 | 0.0147 | 2.71E-08 | 1    |
| rs9519725   | 13 | 106252332 | A | G | 0.6      | -0.083  | 0.0149 | 2.75E-08 | 0.99 |
| rs4857858   | 3  | 128314931 | T | C | 0.71     | 0.0913  | 0.0164 | 2.78E-08 | 1    |
| rs55964643  | 6  | 26340872  | A | G | 0.5      | 0.0838  | 0.0151 | 2.80E-08 | 0.95 |
| rs6416802   | 16 | 88725283  | A | C | 0.17     | 0.1049  | 0.0189 | 2.84E-08 | 0.99 |
| rs72787716  | 2  | 30472355  | T | C | 0.21     | -0.1032 | 0.0186 | 2.85E-08 | 0.99 |
| rs11121623  | 1  | 10850287  | C | G | 0.13     | 0.1178  | 0.0212 | 2.87E-08 | 1    |
| rs62510848  | 8  | 87569710  | G | A | 0.41     | 0.0824  | 0.0149 | 2.90E-08 | 1    |
| rs10817820  | 9  | 118453106 | G | A | 0.1      | -0.1434 | 0.0258 | 2.91E-08 | 0.99 |
| rs9260761   | 6  | 29935469  | C | T | 0.87     | -0.1168 | 0.0211 | 2.91E-08 | 1    |
| rs4782394   | 16 | 88726726  | G | T | 0.17     | 0.1047  | 0.0189 | 2.91E-08 | 0.99 |
| rs12347132  | 9  | 118488899 | C | T | 0.081    | -0.1591 | 0.0287 | 3.01E-08 | 0.99 |
| rs198852    | 6  | 26104448  | G | A | 0.37     | 0.0835  | 0.0151 | 3.01E-08 | 1    |
| rs35866622  | 19 | 49218060  | T | C | 0.5      | 0.0821  | 0.0148 | 3.06E-08 | 0.99 |
| rs17035196  | 2  | 68518614  | A | G | 0.62     | 0.0847  | 0.0153 | 3.09E-08 | 1    |
| rs4857911   | 3  | 128314776 | C | T | 0.71     | 0.091   | 0.0164 | 3.12E-08 | 1    |
| rs3893463   | 6  | 29935405  | T | C | 0.43     | -0.0827 | 0.015  | 3.17E-08 | 1    |
| rs236561    | 17 | 68256221  | C | A | 0.75     | -0.0956 | 0.0173 | 3.37E-08 | 0.92 |
| rs9260743   | 6  | 29933550  | C | T | 0.87     | -0.117  | 0.0212 | 3.38E-08 | 0.99 |
| rs2010527   | 3  | 128303083 | C | G | 0.7      | 0.0903  | 0.0164 | 3.44E-08 | 1    |
| rs9260742   | 6  | 29933549  | G | T | 0.87     | -0.117  | 0.0212 | 3.52E-08 | 0.99 |
| rs2712414   | 3  | 128305217 | G | C | 0.7      | 0.0901  | 0.0164 | 3.54E-08 | 1    |
| rs4857857   | 3  | 128313880 | A | G | 0.3      | -0.0905 | 0.0164 | 3.55E-08 | 1    |
| rs2058743   | 17 | 70040327  | C | G | 0.57     | -0.0816 | 0.0148 | 3.56E-08 | 1    |
| rs36707     | 5  | 127557404 | A | G | 0.51     | -0.081  | 0.0147 | 3.56E-08 | 1    |
| rs9261402   | 6  | 30069137  | T | C | 0.87     | -0.1158 | 0.021  | 3.62E-08 | 1    |
| rs36708     | 5  | 127558258 | A | G | 0.51     | -0.081  | 0.0147 | 3.63E-08 | 1    |
| rs2800709   | 6  | 127439297 | G | T | 0.52     | -0.081  | 0.0147 | 3.64E-08 | 1    |
| rs1936800   | 6  | 127436064 | T | C | 0.53     | -0.081  | 0.0147 | 3.67E-08 | 1    |
| rs59693338  | 2  | 30473177  | C | T | 0.21     | -0.1025 | 0.0186 | 3.68E-08 | 0.99 |
| rs12102677  | 16 | 89016494  | C | A | 0.37     | -0.0847 | 0.0154 | 3.71E-08 | 1    |
| rs12594708  | 15 | 96182066  | T | C | 0.076    | -0.1645 | 0.0299 | 3.72E-08 | 0.98 |
| rs4857910   | 3  | 128306323 | T | C | 0.3      | -0.09   | 0.0164 | 3.76E-08 | 1    |
| rs17035686  | 1  | 10825699  | T | C | 0.032    | 0.2161  | 0.0393 | 3.80E-08 | 0.96 |
| rs1936801   | 6  | 127436313 | G | A | 0.53     | -0.0808 | 0.0147 | 3.84E-08 | 1    |
| rs3893465   | 6  | 29935049  | G | T | 0.87     | -0.1158 | 0.0211 | 3.87E-08 | 1    |
| rs2010054   | 3  | 128305302 | G | A | 0.59     | 0.0832  | 0.0151 | 3.87E-08 | 0.99 |
| rs576153896 | 16 | 74557771  | A | C | 5.00E-04 | 1.1823  | 0.2152 | 3.91E-08 | 0.85 |

|             |    |           |   |   |         |         |        |          |      |
|-------------|----|-----------|---|---|---------|---------|--------|----------|------|
| rs7860973   | 9  | 118376030 | C | T | 0.62    | 0.084   | 0.0153 | 3.96E-08 | 1    |
| rs7763159   | 6  | 30067681  | G | A | 0.87    | -0.1159 | 0.0211 | 3.98E-08 | 1    |
| rs9260685   | 6  | 29926668  | G | C | 0.87    | -0.1157 | 0.0211 | 4.01E-08 | 1    |
| rs12644549  | 4  | 26821836  | A | G | 0.39    | -0.0835 | 0.0152 | 4.01E-08 | 1    |
| rs9260676   | 6  | 29926139  | C | A | 0.87    | -0.1157 | 0.0211 | 4.08E-08 | 1    |
| rs4472395   | 6  | 29932169  | T | A | 0.87    | -0.1156 | 0.0211 | 4.10E-08 | 1    |
| rs9260702   | 6  | 29928309  | C | A | 0.87    | -0.1156 | 0.0211 | 4.13E-08 | 1    |
| rs6775731   | 3  | 128306894 | C | T | 0.7     | 0.0897  | 0.0163 | 4.14E-08 | 1    |
| rs10982884  | 9  | 118462904 | T | C | 0.091   | -0.1483 | 0.027  | 4.15E-08 | 0.99 |
| rs12344818  | 9  | 118490568 | T | C | 0.081   | -0.1579 | 0.0288 | 4.18E-08 | 0.98 |
| rs40624     | 5  | 127557471 | G | T | 0.51    | -0.0806 | 0.0147 | 4.18E-08 | 1    |
| rs4959036   | 6  | 29936135  | T | G | 0.87    | -0.1154 | 0.0211 | 4.23E-08 | 1    |
| rs186005582 | 6  | 68957548  | T | C | 0.00031 | 1.3412  | 0.2447 | 4.24E-08 | 0.85 |
| rs3893259   | 6  | 29934454  | G | A | 0.87    | -0.1154 | 0.0211 | 4.25E-08 | 1    |
| rs36709     | 5  | 127558585 | G | A | 0.51    | -0.0806 | 0.0147 | 4.27E-08 | 1    |
| rs9260737   | 6  | 29932923  | A | G | 0.87    | -0.1154 | 0.0211 | 4.32E-08 | 1    |
| rs198834    | 6  | 26114372  | A | G | 0.37    | 0.0827  | 0.0151 | 4.36E-08 | 1    |
| rs1001204   | 2  | 30478779  | G | A | 0.21    | -0.1015 | 0.0186 | 4.44E-08 | 1    |
| rs198845    | 6  | 26107790  | T | G | 0.37    | 0.0826  | 0.0151 | 4.45E-08 | 1    |
| rs6569966   | 6  | 135020784 | T | C | 0.16    | -0.1149 | 0.021  | 4.46E-08 | 0.99 |
| rs7428052   | 3  | 128311404 | C | T | 0.7     | 0.0894  | 0.0163 | 4.46E-08 | 1    |
| rs2712393   | 3  | 128312647 | C | T | 0.7     | 0.0894  | 0.0163 | 4.47E-08 | 1    |
| rs1549059   | 13 | 106249309 | C | T | 0.64    | -0.0833 | 0.0152 | 4.47E-08 | 0.99 |
| rs7205116   | 16 | 88729008  | A | G | 0.17    | 0.1036  | 0.0189 | 4.49E-08 | 1    |
| rs11121614  | 1  | 10823855  | T | G | 0.031   | 0.2156  | 0.0394 | 4.50E-08 | 0.95 |
| rs2546150   | 5  | 127557916 | T | C | 0.51    | -0.0804 | 0.0147 | 4.54E-08 | 1    |
| rs36704     | 5  | 127554218 | T | C | 0.51    | -0.0804 | 0.0147 | 4.54E-08 | 1    |
| rs42915     | 5  | 127557891 | T | C | 0.51    | -0.0804 | 0.0147 | 4.55E-08 | 1    |
| rs6708792   | 2  | 30468860  | T | C | 0.21    | -0.1017 | 0.0186 | 4.57E-08 | 0.99 |
| rs166327    | 6  | 30002881  | C | T | 0.43    | -0.0817 | 0.0149 | 4.59E-08 | 1    |
| rs12073890  | 1  | 10822357  | A | G | 0.032   | 0.2161  | 0.0395 | 4.62E-08 | 0.95 |
| rs1549058   | 13 | 106249259 | C | T | 0.64    | -0.0832 | 0.0152 | 4.62E-08 | 0.99 |
| rs1061536   | 6  | 29937826  | C | T | 0.87    | -0.1151 | 0.0211 | 4.62E-08 | 1    |
| rs1642687   | 13 | 106249821 | G | C | 0.61    | -0.0819 | 0.015  | 4.64E-08 | 1    |
| rs4782422   | 16 | 88754670  | A | G | 0.12    | -0.1303 | 0.0238 | 4.67E-08 | 0.96 |
| rs1549060   | 13 | 106249489 | T | C | 0.64    | -0.0832 | 0.0152 | 4.68E-08 | 0.99 |
| rs192647746 | 4  | 182760366 | G | A | 0.0011  | 0.863   | 0.158  | 4.73E-08 | 0.92 |
| rs2394251   | 6  | 29943688  | C | G | 0.74    | -0.0896 | 0.0164 | 4.78E-08 | 1    |
| rs11121613  | 1  | 10823774  | A | G | 0.031   | 0.2153  | 0.0394 | 4.82E-08 | 0.95 |
| rs60694428  | 1  | 10822546  | A | G | 0.031   | 0.2159  | 0.0396 | 4.85E-08 | 0.95 |
| rs476328    | 16 | 89004360  | T | C | 0.37    | -0.0841 | 0.0154 | 4.86E-08 | 1    |
| rs11805825  | 1  | 10823388  | G | C | 0.032   | 0.2153  | 0.0395 | 4.87E-08 | 0.95 |
| rs906865    | 2  | 30478173  | T | C | 0.21    | -0.1014 | 0.0186 | 4.88E-08 | 1    |
| rs77510037  | 1  | 10825410  | T | C | 0.031   | 0.2148  | 0.0394 | 4.90E-08 | 0.96 |
| rs2275294   | 20 | 62594247  | A | G | 0.25    | 0.0932  | 0.0171 | 4.90E-08 | 0.95 |

|            |   |          |   |   |       |        |        |          |      |
|------------|---|----------|---|---|-------|--------|--------|----------|------|
| rs13194984 | 6 | 26500563 | T | G | 0.14  | 0.1094 | 0.0201 | 4.97E-08 | 1    |
| rs72862933 | 1 | 10826595 | T | G | 0.031 | 0.2143 | 0.0393 | 4.98E-08 | 0.96 |

**Supplemental Table 7. Results from eQTL analysis of varicose vein-associated loci.**

| rsID      | Variant ID      | Database | Tissue                          | Symbol              | P-value   | FDR         |
|-----------|-----------------|----------|---------------------------------|---------------------|-----------|-------------|
| rs2861819 | 2:68489221:C:G  | BIOSQTL  | BIOS_eQTL_geneLevel             | <i>PNO1</i>         | 1.28E-46  | 0           |
| rs2861819 | 2:68489221:C:G  | BIOSQTL  | BIOS_eQTL_geneLevel             | <i>PNO1</i>         | 6.20E-19  | 0           |
| rs2861819 | 2:68489221:C:G  | BIOSQTL  | BIOS_eQTL_geneLevel             | <i>PLEK</i>         | 2.24E-08  | 3.46E-05    |
| rs2861819 | 2:68489221:C:G  | BIOSQTL  | BIOS_eQTL_geneLevel             | <i>CNRIP1</i>       | 3.38E-05  | 0.020489957 |
| rs2861819 | 2:68489221:C:G  | BIOSQTL  | BIOS_eQTL_geneLevel             | <i>PPP3R1</i>       | 2.24E-08  | 3.46E-05    |
| rs2861819 | 2:68489221:C:G  | BIOSQTL  | BIOS_eQTL_geneLevel             | <i>PPP3R1</i>       | 6.20E-19  | 0           |
| rs2861819 | 2:68489221:C:G  | BIOSQTL  | BIOS_eQTL_geneLevel             | <i>WDR92</i>        | 2.08E-05  | 0.013341165 |
| rs2861819 | 2:68489221:C:G  | GTEEx    | Artery -Tibial                  | <i>PPP3R1</i>       | 1.73E-08  | 0.000263002 |
| rs2911463 | 16:88835545:A:G | BIOSQTL  | BIOS_eQTL_geneLevel             | <i>GALNS</i>        | 4.75E-09  | 5.97E-06    |
| rs2911463 | 16:88835545:A:G | BIOSQTL  | BIOS_eQTL_geneLevel             | <i>APRT</i>         | 5.82E-05  | 0.033495232 |
| rs2911463 | 16:88835545:A:G | GTEEx    | Muscle - Skeletal               | <i>RNF166</i>       | 1.87E-06  | 0.00030405  |
| rs2911463 | 16:88835545:A:G | GTEEx    | Cells - Transformed fibroblasts | <i>PIEZO1</i>       | 1.50E-05  |             |
| rs8053350 | 16:88794403:A:G | BIOSQTL  | BIOS_eQTL_geneLevel             | <i>PIEZO1</i>       | 1.62E-11  | 0           |
| rs8053350 | 16:88794403:A:G | BIOSQTL  | BIOS_eQTL_geneLevel             | <i>PIEZO1</i>       | 1.49E-13  | 0           |
| rs8053350 | 16:88794403:A:G | BIOSQTL  | BIOS_eQTL_geneLevel             | <i>PIEZO1</i>       | 1.45E-17  | 0           |
| rs8053350 | 16:88794403:A:G | BIOSQTL  | BIOS_eQTL_geneLevel             | <i>PIEZO1</i>       | 5.72E-23  | 0           |
| rs8053350 | 16:88794403:A:G | BIOSQTL  | BIOS_eQTL_geneLevel             | <i>RNF166</i>       | 2.27E-48  | 0           |
| rs8053350 | 16:88794403:A:G | BIOSQTL  | BIOS_eQTL_geneLevel             | <i>RNF166</i>       | 3.01E-70  | 0           |
| rs8053350 | 16:88794403:A:G | BIOSQTL  | BIOS_eQTL_geneLevel             | <i>CTU2</i>         | 1.62E-11  | 0           |
| rs8053350 | 16:88794403:A:G | BIOSQTL  | BIOS_eQTL_geneLevel             | <i>CTU2</i>         | 5.91E-17  | 0           |
| rs8053350 | 16:88794403:A:G | BIOSQTL  | BIOS_eQTL_geneLevel             | <i>SNAI3</i>        | 4.83E-14  | 0           |
| rs8053350 | 16:88794403:A:G | BIOSQTL  | BIOS_eQTL_geneLevel             | <i>MIR4722</i>      | 1.49E-13  | 0           |
| rs8053350 | 16:88794403:A:G | GTEEx    | Skin_Sun_Exposed_Lower_leg      | <i>RNF166</i>       | 1.05E-06  | 0.000288    |
| rs3101725 | 5:127524018:C:T | BIOSQTL  | BIOS_eQTL_geneLevel             | <i>SLC12A2</i>      | 6.73E-10  | 0           |
| rs3101725 | 5:127524018:C:T | BIOSQTL  | BIOS_eQTL_geneLevel             | <i>CTC-228N24.1</i> | 7.90E-16  | 0           |
| rs3101725 | 5:127524018:C:T | BIOSQTL  | BIOS_eQTL_geneLevel             | <i>CTC-228N24.3</i> | 3.67E-100 | 0           |
| rs3101725 | 5:127524018:C:T | BIOSQTL  | BIOS_eQTL_geneLevel             | <i>CTC-228N24.3</i> | 7.90E-16  | 0           |
| rs3101725 | 5:127524018:C:T | GTEEx    | Skin_Sun_Exposed_Lower_leg      | <i>CTC-228N24.3</i> | 9.75E-15  | 0.00028813  |
| rs3101725 | 5:127524018:C:T | GTEEx    | Skin_Not_Sun_Exposed_Suprapubic | <i>CTC-228N24.3</i> | 2.23E-11  | 0.000506735 |
| rs3101725 | 5:127524018:C:T | GTEEx    | Cells_Transformed_fibroblasts   | <i>CTC-228N24.3</i> | 2.48E-11  | 0.00020866  |
| rs3101725 | 5:127524018:C:T | GTEEx    | Pancreas                        | <i>CTC-228N24.3</i> | 3.43E-10  | 0.00061307  |
| rs3101725 | 5:127524018:C:T | GTEEx    | Nerve_Tibial                    | <i>CTC-228N24.3</i> | 2.45E-08  | 0.000222679 |
| rs3101725 | 5:127524018:C:T | GTEEx    | Muscle_Skeletal                 | <i>CTC-228N24.3</i> | 4.23E-22  | 0.00030405  |
| rs3101725 | 5:127524018:C:T | GTEEx    | Lung                            | <i>CTC-228N24.3</i> | 5.23E-13  | 0.00038378  |
| rs3101725 | 5:127524018:C:T | GTEEx    | Heart_Atrial_Appendage          | <i>CTC-228N24.3</i> | 7.41E-11  | 0.000720745 |
| rs3101725 | 5:127524018:C:T | GTEEx    | Testis                          | <i>CTC-228N24.3</i> | 6.83E-06  | 0.000378299 |
| rs3101725 | 5:127524018:C:T | GTEEx    | Esophagus_Muscularis            | <i>CTC-228N24.3</i> | 1.83E-06  | 0.000335986 |
| rs3101725 | 5:127524018:C:T | GTEEx    | Esophagus_Mucosa                | <i>CTC-228N24.3</i> | 4.81E-07  | 0.000312239 |
| rs3101725 | 5:127524018:C:T | GTEEx    | Colon_Sigmoid                   | <i>CTC-228N24.3</i> | 6.16E-08  | 0.001104115 |
| rs3101725 | 5:127524018:C:T | GTEEx    | Artery_Tibial                   | <i>CTC-228N24.3</i> | 2.07E-10  | 0.000263002 |
| rs3101725 | 5:127524018:C:T | GTEEx    | Whole_Blood                     | <i>CTC-228N24.3</i> | 3.46E-07  | 0.000333874 |
| rs3101725 | 5:127524018:C:T | GTEEx    | Adipose_Subcutaneous            | <i>CTC-228N24.3</i> | 2.98E-17  | 0.000270753 |
| rs3101725 | 5:127524018:C:T | GTEEx    | Heart_Left_Ventricle            | <i>CTC-228N24.3</i> | 4.81E-10  | 0.000596884 |

|            |                     |         |                                 |                     |           |             |
|------------|---------------------|---------|---------------------------------|---------------------|-----------|-------------|
| rs3101725  | 5:127524018:C:T     | GTEEx   | Thyroid                         | <i>CTC-228N24.3</i> | 2.07E-10  | 0.00022     |
| rs3101725  | 5:127524018:C:T     | BIOSQTL | BIOS_eQTL_geneLevel             | <i>SLC12A2</i>      | 6.73E-10  | 0           |
| rs3101725  | 5:127524018:C:T     | BIOSQTL | BIOS_eQTL_geneLevel             | <i>CTC-228N24.1</i> | 7.90E-16  | 0           |
| rs3101725  | 5:127524018:C:T     | BIOSQTL | BIOS_eQTL_geneLevel             | <i>CTC-228N24.3</i> | 3.67E-100 | 0           |
| rs3101725  | 5:127524018:C:T     | BIOSQTL | BIOS_eQTL_geneLevel             | <i>CTC-228N24.3</i> | 7.90E-16  | 0           |
| rs3101725  | 5:127524018:C:T     | GTEEx   | Skin_Sun_Exposed_Lower_leg      | <i>CTC-228N24.3</i> | 9.75E-15  | 0.00028813  |
| rs3101725  | 5:127524018:C:T     | GTEEx   | Skin_Not_Sun_Exposed_Suprapubic | <i>CTC-228N24.3</i> | 2.23E-11  | 0.000506735 |
| rs3101725  | 5:127524018:C:T     | GTEEx   | Cells_Transformed_fibroblasts   | <i>CTC-228N24.3</i> | 2.48E-11  | 0.00020866  |
| rs3101725  | 5:127524018:C:T     | GTEEx   | Thyroid                         | <i>FBN2</i>         | 9.50E-07  |             |
| rs7773004  | 6_26267755_A_G_b37  | GTEEx   | Testis                          | <i>BTN3A2</i>       | 7.30E-07  |             |
| rs7773004  | 6_26267755_A_G_b37  | GTEEx   | Artery - Aorta                  | <i>BTN3A2</i>       | 0.0000011 |             |
| rs7773004  | 6_26267755_A_G_b37  | GTEEx   | Heart - Atrial Appendage        | <i>BTN3A2</i>       | 0.0000012 |             |
| rs7773004  | 6_26267755_A_G_b37  | GTEEx   | Artery - Tibial                 | <i>BTN3A2</i>       | 0.0000023 |             |
| rs7773004  | 6_26267755_A_G_b37  | GTEEx   | Skin - Sun Exposed (Lower leg)  | <i>BTN3A2</i>       | 0.0000035 |             |
| rs7773004  | 6_26267755_A_G_b37  | GTEEx   | Skin - Sun Exposed (Lower leg)  | <i>BTN2A2</i>       | 0.0000041 |             |
| rs7773004  | 6_26267755_A_G_b37  | GTEEx   | Heart - Left Ventricle          | <i>BTN3A2</i>       | 0.0000086 |             |
| rs7773004  | 6_26267755_A_G_b37  | GTEEx   | Whole Blood                     | <i>HIST1H2BD</i>    | 0.000028  |             |
| rs7773004  | 6_26267755_A_G_b37  | GTEEx   | Colon - Transverse              | <i>BTN3A2</i>       | 0.000061  |             |
| rs7614922  | 3:128238222:C:G     | BIOSQTL | BIOS_eQTL_geneLevel             | <i>C3orf27</i>      | 1.62E-05  | 0.010544088 |
| rs7614922  | 3:128238222:C:G     | BIOSQTL | BIOS_eQTL_geneLevel             | <i>POU5F1P6</i>     | 4.27E-05  | 0.025350579 |
| rs7614922  | 3_128238222_G_C_b37 | GTEEx   | Testis                          | <i>TMED10P2</i>     | 0.0000076 |             |
| rs7614922  | 3_128238222_G_C_b37 | GTEEx   | Whole Blood                     | <i>IFT122</i>       | 0.000013  |             |
| rs7614922  | 3_128238222_G_C_b37 | GTEEx   | Esophagus - Mucosa              | <i>ACAD9</i>        | 0.000027  |             |
| rs73107980 | 12:48187601:C:T     | BIOSQTL | BIOS_eQTL_geneLevel             | <i>RPAP3</i>        | 7.64E-08  | 6.17E-05    |
| rs73107980 | 12:48187601:C:T     | BIOSQTL | BIOS_eQTL_geneLevel             | <i>RAPGEF3</i>      | 2.58E-05  | 0.01601657  |
| rs73107980 | 12:48187601:C:T     | BIOSQTL | BIOS_eQTL_geneLevel             | <i>RAPGEF3</i>      | 2.34E-13  | 0           |
| rs73107980 | 12:48187601:C:T     | BIOSQTL | BIOS_eQTL_geneLevel             | <i>RP1-197B17.3</i> | 2.58E-05  | 0.01601657  |
| rs73107980 | 12:48187601:C:T     | BIOSQTL | BIOS_eQTL_geneLevel             | <i>RP1-197B17.3</i> | 3.60E-14  | 0           |
| rs7469817  | 9_118296829_G_C_b37 | GTEEx   | Artery - Tibial                 | <i>RP11-445L6.3</i> | 0.0000023 |             |
| rs2241173  | 17:70028445:A:G     | GTEEx   | Pancreas                        | <i>AC005152.3</i>   | 7.76E-07  | 0.00061307  |
| rs2241173  | 17:70028445:A:G     | GTEEx   | Skin_Not_Sun_Exposed_Suprapubic | <i>AC005152.3</i>   | 2.88E-10  | 0.000506735 |
| rs2241173  | 17:70028445:A:G     | GTEEx   | Skin_Sun_Exposed_Lower_leg      | <i>AC005152.3</i>   | 6.69E-15  | 0.00028813  |
| rs2241173  | 17:70028445:A:G     | GTEEx   | Skin_Sun_Exposed_Lower_leg      | <i>LINC01152</i>    | 9.14E-09  | 0.00028813  |
| rs816943   | 20:62676009:A:G     | BIOSQTL | BIOS_eQTL_geneLevel             | <i>PRPF6</i>        | 7.44E-20  | 0           |
| rs816943   | 20:62676009:A:G     | BIOSQTL | BIOS_eQTL_geneLevel             | <i>SAMD10</i>       | 2.03E-59  | 0           |
| rs816943   | 20:62676009:A:G     | BIOSQTL | BIOS_eQTL_geneLevel             | <i>LINC00176</i>    | 4.69E-65  | 0           |
| rs816943   | 20:62676009:A:G     | BIOSQTL | BIOS_eQTL_geneLevel             | <i>LINC00176</i>    | 3.96E-86  | 0           |
| rs816943   | 20:62676009:A:G     | BIOSQTL | BIOS_eQTL_geneLevel             | <i>ZNF512B</i>      | 4.69E-65  | 0           |
| rs816943   | 20:62676009:A:G     | BIOSQTL | BIOS_eQTL_geneLevel             | <i>ZNF512B</i>      | 4.90E-06  | 0.003455153 |
| rs816943   | 20:62676009:A:G     | BIOSQTL | BIOS_eQTL_geneLevel             | <i>ZNF512B</i>      | 2.68E-06  | 0.002030018 |
| rs816943   | 20:62676009:A:G     | BIOSQTL | BIOS_eQTL_geneLevel             | <i>UCKL1</i>        | 3.06E-19  | 0           |
| rs816943   | 20:62676009:A:G     | BIOSQTL | BIOS_eQTL_geneLevel             | <i>SOX18</i>        | 2.68E-06  | 0.002030018 |
| rs816943   | 20:62676009:A:G     | GTEEx   | Whole_Blood                     | <i>LINC00176</i>    | 6.38E-07  | 0.000333874 |
| rs816943   | 20:62676009:A:G     | GTEEx   | Esophagus_Mucosa                | <i>SAMD10</i>       | 7.35E-06  | 0.022561787 |
| rs1061539  | 6_29937555_T_C_b37  | GTEEx   | Adipose - Subcutaneous          | <i>HLA-H</i>        | 2.00E-18  | 0.65        |

|           |                    |       |                                       |                  |          |       |
|-----------|--------------------|-------|---------------------------------------|------------------|----------|-------|
| rs1061539 | 6_29937555_T_C_b37 | GTEEx | Muscle - Skeletal                     | <i>HLA-H</i>     | 3.60E-18 | 0.59  |
| rs1061539 | 6_29937555_T_C_b37 | GTEEx | Cells - Transformed fibroblasts       | <i>HLA-H</i>     | 2.90E-17 | 0.72  |
| rs1061539 | 6_29937555_T_C_b37 | GTEEx | Nerve - Tibial                        | <i>HLA-H</i>     | 2.30E-16 | 0.66  |
| rs1061539 | 6_29937555_T_C_b37 | GTEEx | Adipose - Subcutaneous                | <i>HCG4P7</i>    | 2.50E-16 | -0.65 |
| rs1061539 | 6_29937555_T_C_b37 | GTEEx | Artery - Tibial                       | <i>HLA-H</i>     | 1.00E-15 | 0.51  |
| rs1061539 | 6_29937555_T_C_b37 | GTEEx | Adipose - Visceral (Omentum)          | <i>HCG4P7</i>    | 3.00E-13 | -0.53 |
| rs1061539 | 6_29937555_T_C_b37 | GTEEx | Cells - Transformed fibroblasts       | <i>HLA-A</i>     | 2.20E-12 | -0.57 |
| rs1061539 | 6_29937555_T_C_b37 | GTEEx | Lung                                  | <i>HCG4P7</i>    | 6.50E-12 | -0.55 |
| rs1061539 | 6_29937555_T_C_b37 | GTEEx | Heart - Left Ventricle                | <i>HLA-H</i>     | 2.80E-11 | 0.55  |
| rs1061539 | 6_29937555_T_C_b37 | GTEEx | Esophagus - Mucosa                    | <i>HLA-H</i>     | 3.80E-11 | 0.5   |
| rs1061539 | 6_29937555_T_C_b37 | GTEEx | Artery - Aorta                        | <i>HLA-H</i>     | 4.50E-11 | 0.66  |
| rs1061539 | 6_29937555_T_C_b37 | GTEEx | Esophagus - Muscularis                | <i>HLA-H</i>     | 6.20E-11 | 0.53  |
| rs1061539 | 6_29937555_T_C_b37 | GTEEx | Esophagus - Mucosa                    | <i>RNF39</i>     | 7.10E-11 | 0.29  |
| rs1061539 | 6_29937555_T_C_b37 | GTEEx | Adrenal Gland                         | <i>HCG4P7</i>    | 8.60E-11 | -0.86 |
| rs1061539 | 6_29937555_T_C_b37 | GTEEx | Thyroid                               | <i>HCG4P7</i>    | 1.80E-10 | -0.46 |
| rs1061539 | 6_29937555_T_C_b37 | GTEEx | Testis                                | <i>HLA-H</i>     | 3.20E-10 | 0.51  |
| rs1061539 | 6_29937555_T_C_b37 | GTEEx | Heart - Atrial Appendage              | <i>HLA-H</i>     | 4.50E-10 | 0.57  |
| rs1061539 | 6_29937555_T_C_b37 | GTEEx | Testis                                | <i>HLA-K</i>     | 4.70E-10 | -0.69 |
| rs1061539 | 6_29937555_T_C_b37 | GTEEx | Lung                                  | <i>HLA-H</i>     | 6.50E-10 | 0.5   |
| rs1061539 | 6_29937555_T_C_b37 | GTEEx | Breast - Mammary Tissue               | <i>HCG4P7</i>    | 7.00E-10 | -0.52 |
| rs1061539 | 6_29937555_T_C_b37 | GTEEx | Nerve - Tibial                        | <i>HLA-W</i>     | 7.30E-10 | 0.56  |
| rs1061539 | 6_29937555_T_C_b37 | GTEEx | Skin - Not Sun Exposed (Suprapubic)   | <i>HLA-H</i>     | 9.70E-10 | 0.52  |
| rs1061539 | 6_29937555_T_C_b37 | GTEEx | Thyroid                               | <i>HLA-H</i>     | 1.30E-09 | 0.42  |
| rs1061539 | 6_29937555_T_C_b37 | GTEEx | Skin - Sun Exposed (Lower leg)        | <i>HLA-H</i>     | 2.30E-09 | 0.47  |
| rs1061539 | 6_29937555_T_C_b37 | GTEEx | Whole Blood                           | <i>HLA-H</i>     | 3.00E-09 | 0.46  |
| rs1061539 | 6_29937555_T_C_b37 | GTEEx | Esophagus - Muscularis                | <i>RPL23AP1</i>  | 3.40E-09 | 0.54  |
| rs1061539 | 6_29937555_T_C_b37 | GTEEx | Colon - Transverse                    | <i>HLA-H</i>     | 4.80E-09 | 0.43  |
| rs1061539 | 6_29937555_T_C_b37 | GTEEx | Cells - EBV-transformed lymphocytes   | <i>HLA-A</i>     | 9.90E-09 | -0.48 |
| rs1061539 | 6_29937555_T_C_b37 | GTEEx | Artery - Aorta                        | <i>HLA-J</i>     | 1.80E-08 | 0.52  |
| rs1061539 | 6_29937555_T_C_b37 | GTEEx | Adipose - Visceral (Omentum)          | <i>HLA-H</i>     | 2.20E-08 | 0.47  |
| rs1061539 | 6_29937555_T_C_b37 | GTEEx | Cells - Transformed fibroblasts       | <i>HLA-F-AS1</i> | 2.50E-08 | 0.34  |
| rs1061539 | 6_29937555_T_C_b37 | GTEEx | Esophagus - Gastroesophageal Junction | <i>HLA-H</i>     | 3.00E-08 | 0.55  |
| rs1061539 | 6_29937555_T_C_b37 | GTEEx | Esophagus - Gastroesophageal Junction | <i>RPL23AP1</i>  | 7.80E-08 | 0.57  |
| rs1061539 | 6_29937555_T_C_b37 | GTEEx | Skin - Not Sun Exposed (Suprapubic)   | <i>HCG4P7</i>    | 8.60E-08 | -0.47 |
| rs1061539 | 6_29937555_T_C_b37 | GTEEx | Muscle - Skeletal                     | <i>HCG4P7</i>    | 1.00E-07 | -0.39 |
| rs1061539 | 6_29937555_T_C_b37 | GTEEx | Thyroid                               | <i>HLA-A</i>     | 1.20E-07 | -0.28 |
| rs1061539 | 6_29937555_T_C_b37 | GTEEx | Heart - Atrial Appendage              | <i>HCG4P7</i>    | 1.70E-07 | -0.49 |
| rs1061539 | 6_29937555_T_C_b37 | GTEEx | Colon - Transverse                    | <i>HLA-G</i>     | 1.80E-07 | 0.45  |
| rs1061539 | 6_29937555_T_C_b37 | GTEEx | Adipose - Subcutaneous                | <i>RPL23AP1</i>  | 1.80E-07 | 0.38  |
| rs1061539 | 6_29937555_T_C_b37 | GTEEx | Whole Blood                           | <i>HCG4P7</i>    | 2.10E-07 | -0.4  |
| rs1061539 | 6_29937555_T_C_b37 | GTEEx | Artery - Aorta                        | <i>HLA-K</i>     | 2.70E-07 | -0.56 |
| rs1061539 | 6_29937555_T_C_b37 | GTEEx | Spleen                                | <i>HLA-F-AS1</i> | 2.90E-07 | 0.47  |
| rs1061539 | 6_29937555_T_C_b37 | GTEEx | Adrenal Gland                         | <i>HLA-H</i>     | 3.50E-07 | 0.74  |
| rs1061539 | 6_29937555_T_C_b37 | GTEEx | Adipose - Subcutaneous                | <i>HLA-U</i>     | 4.20E-07 | 0.45  |
| rs1061539 | 6_29937555_T_C_b37 | GTEEx | Thyroid                               | <i>ZFP57</i>     | 4.40E-07 | 0.39  |

|           |                    |       |                                           |           |           |       |
|-----------|--------------------|-------|-------------------------------------------|-----------|-----------|-------|
| rs1061539 | 6_29937555_T_C_b37 | GTEEx | Skin - Not Sun Exposed (Suprapubic)       | ZFP57     | 4.50E-07  | 0.48  |
| rs1061539 | 6_29937555_T_C_b37 | GTEEx | Artery - Aorta                            | HLA-A     | 7.20E-07  | -0.41 |
| rs1061539 | 6_29937555_T_C_b37 | GTEEx | Stomach                                   | HLA-H     | 7.50E-07  | 0.44  |
| rs1061539 | 6_29937555_T_C_b37 | GTEEx | Vagina                                    | HLA-H     | 8.00E-07  | 0.71  |
| rs1061539 | 6_29937555_T_C_b37 | GTEEx | Breast - Mammary Tissue                   | HLA-H     | 8.60E-07  | 0.43  |
| rs1061539 | 6_29937555_T_C_b37 | GTEEx | Skin - Not Sun Exposed (Suprapubic)       | HLA-J     | 8.70E-07  | 0.42  |
| rs1061539 | 6_29937555_T_C_b37 | GTEEx | Whole Blood                               | IFITM4P   | 9.40E-07  | 0.39  |
| rs1061539 | 6_29937555_T_C_b37 | GTEEx | Spleen                                    | HCG4P7    | 9.40E-07  | -0.56 |
| rs1061539 | 6_29937555_T_C_b37 | GTEEx | Cells - EBV-transformed lymphocytes       | HLA-F     | 9.70E-07  | -0.33 |
| rs1061539 | 6_29937555_T_C_b37 | GTEEx | Whole Blood                               | MICD      | 0.0000012 | 0.36  |
| rs1061539 | 6_29937555_T_C_b37 | GTEEx | Brain - Caudate (basal ganglia)           | HCG4P7    | 0.0000014 | -0.7  |
| rs1061539 | 6_29937555_T_C_b37 | GTEEx | Whole Blood                               | HLA-F     | 0.0000016 | -0.27 |
| rs1061539 | 6_29937555_T_C_b37 | GTEEx | Esophagus - Mucosa                        | HLA-J     | 0.0000017 | 0.36  |
| rs1061539 | 6_29937555_T_C_b37 | GTEEx | Whole Blood                               | HLA-U     | 0.0000017 | 0.41  |
| rs1061539 | 6_29937555_T_C_b37 | GTEEx | Testis                                    | HCG4B     | 0.0000021 | -0.56 |
| rs1061539 | 6_29937555_T_C_b37 | GTEEx | Artery - Tibial                           | HLA-A     | 0.0000021 | -0.2  |
| rs1061539 | 6_29937555_T_C_b37 | GTEEx | Brain - Hypothalamus                      | HLA-H     | 0.0000025 | 0.72  |
| rs1061539 | 6_29937555_T_C_b37 | GTEEx | Skin - Sun Exposed (Lower leg)            | HCG4P7    | 0.000003  | -0.37 |
| rs1061539 | 6_29937555_T_C_b37 | GTEEx | Esophagus - Muscularis                    | ABCF1     | 0.0000032 | 0.13  |
| rs1061539 | 6_29937555_T_C_b37 | GTEEx | Adipose - Visceral (Omentum)              | HLA-W     | 0.0000041 | 0.44  |
| rs1061539 | 6_29937555_T_C_b37 | GTEEx | Muscle - Skeletal                         | HLA-U     | 0.0000041 | 0.37  |
| rs1061539 | 6_29937555_T_C_b37 | GTEEx | Brain - Frontal Cortex (BA9)              | HLA-H     | 0.0000043 | 0.58  |
| rs1061539 | 6_29937555_T_C_b37 | GTEEx | Cells - EBV-transformed lymphocytes       | HLA-F-AS1 | 0.0000045 | 0.49  |
| rs1061539 | 6_29937555_T_C_b37 | GTEEx | Stomach                                   | HCG4P7    | 0.0000052 | -0.45 |
| rs1061539 | 6_29937555_T_C_b37 | GTEEx | Artery - Coronary                         | HCG4P7    | 0.0000053 | -0.52 |
| rs1061539 | 6_29937555_T_C_b37 | GTEEx | Esophagus - Muscularis                    | HLA-A     | 0.000006  | -0.29 |
| rs1061539 | 6_29937555_T_C_b37 | GTEEx | Heart - Left Ventricle                    | HLA-U     | 0.000006  | 0.49  |
| rs1061539 | 6_29937555_T_C_b37 | GTEEx | Brain - Cerebellar Hemisphere             | HLA-H     | 0.0000061 | 0.73  |
| rs1061539 | 6_29937555_T_C_b37 | GTEEx | Brain - Nucleus accumbens (basal ganglia) | HLA-H     | 0.000007  | 0.57  |
| rs1061539 | 6_29937555_T_C_b37 | GTEEx | Skin - Sun Exposed (Lower leg)            | HLA-A     | 0.000007  | -0.22 |
| rs1061539 | 6_29937555_T_C_b37 | GTEEx | Small Intestine - Terminal Ileum          | HCG4P7    | 0.0000072 | -0.59 |
| rs1061539 | 6_29937555_T_C_b37 | GTEEx | Brain - Cortex                            | HCG4P7    | 0.0000073 | -0.7  |
| rs1061539 | 6_29937555_T_C_b37 | GTEEx | Esophagus - Muscularis                    | HLA-J     | 0.0000075 | 0.35  |
| rs1061539 | 6_29937555_T_C_b37 | GTEEx | Adipose - Visceral (Omentum)              | HLA-U     | 0.0000077 | 0.44  |
| rs1061539 | 6_29937555_T_C_b37 | GTEEx | Artery - Tibial                           | HLA-J     | 0.0000079 | 0.3   |
| rs1061539 | 6_29937555_T_C_b37 | GTEEx | Testis                                    | HCG4P7    | 0.0000086 | -0.46 |
| rs1061539 | 6_29937555_T_C_b37 | GTEEx | Liver                                     | HCG4P7    | 0.0000089 | -0.56 |
| rs1061539 | 6_29937555_T_C_b37 | GTEEx | Artery - Tibial                           | HCG4P7    | 0.0000091 | -0.34 |
| rs1061539 | 6_29937555_T_C_b37 | GTEEx | Brain - Putamen (basal ganglia)           | HLA-H     | 0.0000092 | 0.58  |
| rs1061539 | 6_29937555_T_C_b37 | GTEEx | Minor Salivary Gland                      | HLA-H     | 0.0000097 | 0.85  |
| rs1061539 | 6_29937555_T_C_b37 | GTEEx | Liver                                     | HLA-K     | 0.00001   | -0.5  |
| rs1061539 | 6_29937555_T_C_b37 | GTEEx | Thyroid                                   | HLA-W     | 0.000011  | 0.36  |
| rs1061539 | 6_29937555_T_C_b37 | GTEEx | Esophagus - Mucosa                        | HLA-K     | 0.000011  | -0.39 |
| rs1061539 | 6_29937555_T_C_b37 | GTEEx | Lung                                      | HLA-U     | 0.000011  | 0.4   |
| rs1061539 | 6_29937555_T_C_b37 | GTEEx | Colon - Transverse                        | HCG4P7    | 0.000012  | -0.43 |

|           |                    |         |                                       |                   |          |       |
|-----------|--------------------|---------|---------------------------------------|-------------------|----------|-------|
| rs1061539 | 6_29937555_T_C_b37 | GTEEx   | Brain - Caudate (basal ganglia)       | <i>HLA-H</i>      | 0.000012 | 0.5   |
| rs1061539 | 6_29937555_T_C_b37 | GTEEx   | Muscle - Skeletal                     | <i>HLA-J</i>      | 0.000013 | 0.3   |
| rs1061539 | 6_29937555_T_C_b37 | GTEEx   | Prostate                              | <i>HCG4P7</i>     | 0.000013 | -0.68 |
| rs1061539 | 6_29937555_T_C_b37 | GTEEx   | Pancreas                              | <i>HCG4P7</i>     | 0.000014 | -0.49 |
| rs1061539 | 6_29937555_T_C_b37 | GTEEx   | Artery - Aorta                        | <i>HCG4B</i>      | 0.000014 | -0.46 |
| rs1061539 | 6_29937555_T_C_b37 | GTEEx   | Nerve - Tibial                        | <i>ZNRD1-AS1</i>  | 0.000014 | -0.17 |
| rs1061539 | 6_29937555_T_C_b37 | GTEEx   | Ovary                                 | <i>HLA-K</i>      | 0.000015 | -0.6  |
| rs1061539 | 6_29937555_T_C_b37 | GTEEx   | Adipose - Visceral (Omentum)          | <i>HLA-J</i>      | 0.000017 | 0.32  |
| rs1061539 | 6_29937555_T_C_b37 | GTEEx   | Esophagus - Gastroesophageal Junction | <i>HCG4P7</i>     | 0.000017 | -0.45 |
| rs1061539 | 6_29937555_T_C_b37 | GTEEx   | Skin - Sun Exposed (Lower leg)        | <i>RNF39</i>      | 0.000018 | 0.14  |
| rs1061539 | 6_29937555_T_C_b37 | GTEEx   | Colon - Sigmoid                       | <i>HLA-H</i>      | 0.000019 | 0.49  |
| rs1061539 | 6_29937555_T_C_b37 | GTEEx   | Adipose - Visceral (Omentum)          | <i>ZFP57</i>      | 0.00002  | 0.39  |
| rs1061539 | 6_29937555_T_C_b37 | GTEEx   | Nerve - Tibial                        | <i>HLA-J</i>      | 0.000023 | 0.33  |
| rs1061539 | 6_29937555_T_C_b37 | GTEEx   | Thyroid                               | <i>HLA-U</i>      | 0.000024 | 0.36  |
| rs1061539 | 6_29937555_T_C_b37 | GTEEx   | Brain - Cerebellum                    | <i>HLA-H</i>      | 0.000026 | 0.68  |
| rs1061539 | 6_29937555_T_C_b37 | GTEEx   | Skin - Sun Exposed (Lower leg)        | <i>TRIM31-AS1</i> | 0.000027 | 0.32  |
| rs1061539 | 6_29937555_T_C_b37 | GTEEx   | Nerve - Tibial                        | <i>HLA-A</i>      | 0.000027 | -0.2  |
| rs1061539 | 6_29937555_T_C_b37 | GTEEx   | Esophagus - Mucosa                    | <i>HCG4B</i>      | 0.000027 | -0.35 |
| rs1061539 | 6_29937555_T_C_b37 | GTEEx   | Heart - Atrial Appendage              | <i>HLA-F-AS1</i>  | 0.000029 | 0.3   |
| rs1061539 | 6_29937555_T_C_b37 | GTEEx   | Ovary                                 | <i>HCG4B</i>      | 0.000029 | -0.6  |
| rs1061539 | 6_29937555_T_C_b37 | GTEEx   | Brain - Cortex                        | <i>HLA-H</i>      | 0.000031 | 0.44  |
| rs1061539 | 6_29937555_T_C_b37 | GTEEx   | Artery - Coronary                     | <i>HLA-H</i>      | 0.000032 | 0.51  |
| rs1061539 | 6_29937555_T_C_b37 | GTEEx   | Esophagus - Gastroesophageal Junction | <i>HLA-A</i>      | 0.000033 | -0.31 |
| rs1061539 | 6_29937555_T_C_b37 | GTEEx   | Brain - Caudate (basal ganglia)       | <i>HLA-K</i>      | 0.000034 | -0.59 |
| rs1061539 | 6_29937555_T_C_b37 | GTEEx   | Esophagus - Mucosa                    | <i>PPP1R11</i>    | 0.000036 | 0.15  |
| rs1061539 | 6_29937555_T_C_b37 | GTEEx   | Adipose - Subcutaneous                | <i>ZDHHC20P1</i>  | 0.000037 | 0.33  |
| rs1061539 | 6_29937555_T_C_b37 | GTEEx   | Lung                                  | <i>HLA-F-AS1</i>  | 0.000038 | 0.16  |
| rs1061539 | 6_29937555_T_C_b37 | GTEEx   | Whole Blood                           | <i>HCG9</i>       | 0.000039 | 0.3   |
| rs1061539 | 6_29937555_T_C_b37 | GTEEx   | Artery - Tibial                       | <i>HLA-F-AS1</i>  | 0.000039 | 0.2   |
| rs1061539 | 6_29937555_T_C_b37 | GTEEx   | Adrenal Gland                         | <i>HLA-G</i>      | 0.000042 | 0.52  |
| rs1061539 | 6_29937555_T_C_b37 | GTEEx   | Skin - Sun Exposed (Lower leg)        | <i>HLA-J</i>      | 0.000044 | 0.32  |
| rs1061539 | 6_29937555_T_C_b37 | GTEEx   | Cells - Transformed fibroblasts       | <i>HLA-U</i>      | 0.000046 | 0.43  |
| rs1061539 | 6_29937555_T_C_b37 | GTEEx   | Adipose - Subcutaneous                | <i>HLA-A</i>      | 0.000048 | -0.18 |
| rs1061539 | 6_29937555_T_C_b37 | GTEEx   | Brain - Cerebellar Hemisphere         | <i>HLA-W</i>      | 0.000049 | 0.59  |
| rs1061539 | 6_29937555_T_C_b37 | GTEEx   | Lung                                  | <i>MICD</i>       | 0.000063 | 0.36  |
| rs1061539 | 6_29937555_T_C_b37 | GTEEx   | Skin - Not Sun Exposed (Suprapubic)   | <i>RNF39</i>      | 0.000065 | 0.18  |
| rs1061539 | 6_29937555_T_C_b37 | GTEEx   | Thyroid                               | <i>HLA-J</i>      | 0.000065 | 0.22  |
| rs1061539 | 6_29937555_T_C_b37 | GTEEx   | Skin - Not Sun Exposed (Suprapubic)   | <i>HLA-L</i>      | 0.000071 | 0.34  |
| rs1061539 | 6_29937555_T_C_b37 | GTEEx   | Thyroid                               | <i>HLA-G</i>      | 0.000071 | 0.28  |
| rs1061539 | 6_29937555_T_C_b37 | GTEEx   | Adipose - Subcutaneous                | <i>HLA-J</i>      | 0.000076 | 0.3   |
| rs1061539 | 6_29937555_T_C_b37 | GTEEx   | Nerve - Tibial                        | <i>RPL23AP1</i>   | 0.000084 | 0.33  |
| rs1061539 | 6_29937555_T_C_b37 | GTEEx   | Muscle - Skeletal                     | <i>HLA-L</i>      | 0.000096 | 0.25  |
| rs1061539 | 6_29937555_T_C_b37 | GTEEx   | Esophagus - Muscularis                | <i>HLA-G</i>      | 0.00011  | 0.37  |
| rs1061539 | 6_29937555_T_C_b37 | GTEEx   | Skin - Sun Exposed (Lower leg)        | <i>HLA-F</i>      | 0.00012  | -0.23 |
| rs9719461 | 7:632715:C:T       | BIOSQTL | BIOS_eQTL_geneLevel                   | <i>PRKAR1B</i>    | 7.43E-15 | 0     |



|           |                    |       |                                       |                   |           |       |
|-----------|--------------------|-------|---------------------------------------|-------------------|-----------|-------|
| rs9719461 | 7:632715:C:T       | GTEEx | Lung                                  | <i>ACI47651.4</i> | 1.40E-07  | -0.22 |
| rs2263321 | 6_31340908_G_A_b37 | GTEEx | Adipose - Subcutaneous                | <i>NOTCH4</i>     | 1.70E-11  | -0.21 |
| rs2263321 | 6_31340908_G_A_b37 | GTEEx | Skin - Not Sun Exposed (Suprapubic)   | <i>MICA</i>       | 6.60E-10  | 0.26  |
| rs2263321 | 6_31340908_G_A_b37 | GTEEx | Skin - Sun Exposed (Lower leg)        | <i>MICA</i>       | 1.80E-09  | 0.29  |
| rs2263321 | 6_31340908_G_A_b37 | GTEEx | Esophagus - Mucosa                    | <i>MICA</i>       | 3.20E-09  | 0.27  |
| rs2263321 | 6_31340908_G_A_b37 | GTEEx | Breast - Mammary Tissue               | <i>MICA</i>       | 4.30E-09  | 0.34  |
| rs2263321 | 6_31340908_G_A_b37 | GTEEx | Testis                                | <i>MICA</i>       | 5.30E-09  | 0.37  |
| rs2263321 | 6_31340908_G_A_b37 | GTEEx | Heart - Atrial Appendage              | <i>MICA</i>       | 5.60E-09  | 0.34  |
| rs2263321 | 6_31340908_G_A_b37 | GTEEx | Esophagus - Muscularis                | <i>MICA</i>       | 9.80E-09  | 0.28  |
| rs2263321 | 6_31340908_G_A_b37 | GTEEx | Whole Blood                           | <i>MICA</i>       | 2.50E-08  | 0.24  |
| rs2263321 | 6_31340908_G_A_b37 | GTEEx | Adipose - Subcutaneous                | <i>MICA</i>       | 4.50E-08  | 0.26  |
| rs2263321 | 6_31340908_G_A_b37 | GTEEx | Lung                                  | <i>MICA</i>       | 7.70E-08  | 0.24  |
| rs2263321 | 6_31340908_G_A_b37 | GTEEx | Colon - Transverse                    | <i>CCHCR1</i>     | 9.10E-08  | 0.22  |
| rs2263321 | 6_31340908_G_A_b37 | GTEEx | Muscle - Skeletal                     | <i>NOTCH4</i>     | 2.20E-07  | -0.19 |
| rs2263321 | 6_31340908_G_A_b37 | GTEEx | Nerve - Tibial                        | <i>MICA</i>       | 2.20E-07  | 0.29  |
| rs2263321 | 6_31340908_G_A_b37 | GTEEx | Muscle - Skeletal                     | <i>RNF5</i>       | 4.40E-07  | -0.12 |
| rs2263321 | 6_31340908_G_A_b37 | GTEEx | Colon - Transverse                    | <i>MICA</i>       | 7.20E-07  | 0.34  |
| rs2263321 | 6_31340908_G_A_b37 | GTEEx | Lung                                  | <i>Y_RNA</i>      | 0.0000021 | 0.32  |
| rs2263321 | 6_31340908_G_A_b37 | GTEEx | Esophagus - Gastroesophageal Junction | <i>MICA</i>       | 0.0000021 | 0.28  |
| rs2263321 | 6_31340908_G_A_b37 | GTEEx | Adrenal Gland                         | <i>RNF5</i>       | 0.0000025 | -0.26 |
| rs2263321 | 6_31340908_G_A_b37 | GTEEx | Lung                                  | <i>NOTCH4</i>     | 0.0000056 | -0.17 |
| rs2263321 | 6_31340908_G_A_b37 | GTEEx | Skin - Sun Exposed (Lower leg)        | <i>NOTCH4</i>     | 0.0000066 | -0.13 |
| rs2263321 | 6_31340908_G_A_b37 | GTEEx | Colon - Sigmoid                       | <i>MICA</i>       | 0.0000069 | 0.3   |
| rs2263321 | 6_31340908_G_A_b37 | GTEEx | Nerve - Tibial                        | <i>CCHCR1</i>     | 0.0000074 | 0.17  |
| rs2263321 | 6_31340908_G_A_b37 | GTEEx | Colon - Transverse                    | <i>RNF5</i>       | 0.0000098 | -0.17 |
| rs2263321 | 6_31340908_G_A_b37 | GTEEx | Adipose - Subcutaneous                | <i>PSORSIC3</i>   | 0.00001   | 0.29  |
| rs2263321 | 6_31340908_G_A_b37 | GTEEx | Artery - Coronary                     | <i>MICA</i>       | 0.000013  | 0.36  |
| rs2263321 | 6_31340908_G_A_b37 | GTEEx | Brain - Cerebellum                    | <i>MICB</i>       | 0.000014  | 0.53  |
| rs2263321 | 6_31340908_G_A_b37 | GTEEx | Skin - Sun Exposed (Lower leg)        | <i>C4B</i>        | 0.000015  | 0.26  |
| rs2263321 | 6_31340908_G_A_b37 | GTEEx | Adipose - Subcutaneous                | <i>CCHCR1</i>     | 0.000019  | 0.18  |
| rs2263321 | 6_31340908_G_A_b37 | GTEEx | Pancreas                              | <i>MICA</i>       | 0.000021  | 0.37  |
| rs2263321 | 6_31340908_G_A_b37 | GTEEx | Artery - Tibial                       | <i>MICA</i>       | 0.000021  | 0.23  |
| rs2263321 | 6_31340908_G_A_b37 | GTEEx | Cells - EBV-transformed lymphocytes   | <i>C4A</i>        | 0.000023  | -0.54 |
| rs2263321 | 6_31340908_G_A_b37 | GTEEx | Brain - Cerebellar Hemisphere         | <i>MICB</i>       | 0.000029  | 0.54  |
| rs2263321 | 6_31340908_G_A_b37 | GTEEx | Esophagus - Mucosa                    | <i>C4A</i>        | 0.000033  | -0.24 |
| rs2263321 | 6_31340908_G_A_b37 | GTEEx | Skin - Not Sun Exposed (Suprapubic)   | <i>GPANK1</i>     | 0.000036  | -0.14 |
| rs2263321 | 6_31340908_G_A_b37 | GTEEx | Thyroid                               | <i>CYP21A1P</i>   | 0.000036  | -0.21 |
| rs2263321 | 6_31340908_G_A_b37 | GTEEx | Skin - Sun Exposed (Lower leg)        | <i>C4A</i>        | 0.000038  | -0.23 |
| rs2263321 | 6_31340908_G_A_b37 | GTEEx | Whole Blood                           | <i>C4B</i>        | 0.000043  | 0.3   |
| rs2263321 | 6_31340908_G_A_b37 | GTEEx | Thyroid                               | <i>MICA</i>       | 0.000045  | 0.21  |
| rs2263321 | 6_31340908_G_A_b37 | GTEEx | Brain - Cerebellum                    | <i>C4A</i>        | 0.000045  | -0.5  |
| rs2263321 | 6_31340908_G_A_b37 | GTEEx | Skin - Not Sun Exposed (Suprapubic)   | <i>C4A</i>        | 0.000048  | -0.31 |
| rs2263321 | 6_31340908_G_A_b37 | GTEEx | Nerve - Tibial                        | <i>RNF5</i>       | 0.000057  | -0.12 |
| rs2263321 | 6_31340908_G_A_b37 | GTEEx | Artery - Aorta                        | <i>MICB</i>       | 0.000058  | 0.29  |
| rs2263321 | 6_31340908_G_A_b37 | GTEEx | Nerve - Tibial                        | <i>C4A</i>        | 0.000062  | -0.24 |

|            |                     |         |                                 |                      |           |             |
|------------|---------------------|---------|---------------------------------|----------------------|-----------|-------------|
| rs2263321  | 6_31340908_G_A_b37  | GTEEx   | Esophagus - Muscularis          | <i>AGER</i>          | 0.000063  | 0.12        |
| rs2263321  | 6_31340908_G_A_b37  | GTEEx   | Esophagus - Muscularis          | <i>RNF5</i>          | 0.000064  | -0.12       |
| rs2263321  | 6_31340908_G_A_b37  | GTEEx   | Lung                            | <i>C4A</i>           | 0.000065  | -0.19       |
| rs2263321  | 6_31340908_G_A_b37  | GTEEx   | Cells - Transformed fibroblasts | <i>MICA</i>          | 0.000068  | 0.28        |
| rs2263321  | 6_31340908_G_A_b37  | GTEEx   | Thyroid                         | <i>C4A</i>           | 0.000069  | -0.19       |
| rs2263321  | 6_31340908_G_A_b37  | GTEEx   | Thyroid                         | <i>RNF5</i>          | 0.000089  | -0.14       |
| rs75522736 | 6_135015921_A_G_b37 | GTEEx   | Testis                          | <i>RP11-557H15.5</i> | 0.0000017 | 0.38        |
| rs62512472 | 8:87595590:A:G      | BIOSQTL | BIOS_eQTL_geneLevel             | <i>CPNE3</i>         | 8.62E-08  | 6.72E-05    |
| rs62512472 | 8:87595590:A:G      | BIOSQTL | BIOS_eQTL_geneLevel             | <i>CPNE3</i>         | 3.81E-08  | 4.57E-05    |
| rs62512472 | 8:87595590:A:G      | BIOSQTL | BIOS_eQTL_geneLevel             | <i>WWP1</i>          | 7.29E-10  | 0           |
| rs62512472 | 8:87595590:A:G      | BIOSQTL | BIOS_eQTL_geneLevel             | <i>RMDN1</i>         | 8.62E-08  | 6.72E-05    |
| rs62512472 | 8:87595590:A:G      | BIOSQTL | BIOS_eQTL_geneLevel             | <i>RMDN1</i>         | 9.52E-10  | 6.18E-06    |
| rs62512472 | 8:87595590:A:G      | GTEEx   | Muscle_Skeletal                 | <i>CPNE3</i>         | 3.24E-06  | 0.00030405  |
| rs62512472 | 8:87595590:A:G      | GTEEx   | Skin_Sun_Exposed_Lower_leg      | <i>CPNE3</i>         | 3.47E-09  | 0.000534732 |
| rs584768   | 19:49213284:A:G     | BIOSQTL | BIOS_eQTL_geneLevel             | <i>SULT2B1</i>       | 7.47E-14  | 0           |
| rs584768   | 19:49213284:A:G     | BIOSQTL | BIOS_eQTL_geneLevel             | <i>RASIP1</i>        | 4.63E-05  | 0.027237829 |
| rs584768   | 19:49213284:A:G     | BIOSQTL | BIOS_eQTL_geneLevel             | <i>NTN5</i>          | 3.16E-25  | 0           |
| rs584768   | 19:49213284:A:G     | BIOSQTL | BIOS_eQTL_geneLevel             | <i>NTN5</i>          | 9.03E-39  | 0           |
| rs584768   | 19:49213284:A:G     | BIOSQTL | BIOS_eQTL_geneLevel             | <i>MAMSTR</i>        | 7.79E-06  | 0.00537018  |
| rs584768   | 19:49213284:A:G     | BIOSQTL | BIOS_eQTL_geneLevel             | <i>FUT2</i>          | 2.11E-05  | 0.013530268 |
| rs584768   | 19:49213284:A:G     | BIOSQTL | BIOS_eQTL_geneLevel             | <i>SPACA4</i>        | 1.26E-06  | 0.00106743  |
| rs584768   | 19:49213284:A:G     | BIOSQTL | BIOS_eQTL_geneLevel             | <i>SECIP</i>         | 3.16E-25  | 0           |
| rs584768   | 19:49213284:A:G     | BIOSQTL | BIOS_eQTL_geneLevel             | <i>SECIP</i>         | 3.12E-20  | 0           |
| rs584768   | 19:49213284:A:G     | GTEEx   | Skin_Not_Sun_Exposed_Suprapubic | <i>FUT2</i>          | 2.54E-16  | 0.000506735 |
| rs584768   | 19:49213284:A:G     | GTEEx   | Skin_Sun_Exposed_Lower_leg      | <i>FAM83E</i>        | 7.94E-06  | 0.000534732 |
| rs584768   | 19:49213284:A:G     | GTEEx   | Skin_Sun_Exposed_Lower_leg      | <i>RASIP1</i>        | 1.14E-10  | 0.00028813  |
| rs584768   | 19:49213284:A:G     | GTEEx   | Skin_Sun_Exposed_Lower_leg      | <i>NTN5</i>          | 2.45E-12  | 0.00028813  |
| rs584768   | 19:49213284:A:G     | GTEEx   | Skin_Sun_Exposed_Lower_leg      | <i>FUT2</i>          | 1.87E-17  | 0.00028813  |
| rs584768   | 19:49213284:A:G     | GTEEx   | Testis                          | <i>NTN5</i>          | 1.02E-05  | 0.014041672 |
| rs584768   | 19:49213284:A:G     | GTEEx   | Small_Intestine_Terminal_Ileum  | <i>FUT2</i>          | 8.18E-07  | 0.00863027  |
| rs584768   | 19:49213284:A:G     | GTEEx   | Stomach                         | <i>FUT2</i>          | 1.19E-20  | 0.000924705 |
| rs584768   | 19:49213284:A:G     | GTEEx   | Testis                          | <i>RASIP1</i>        | 6.39E-12  | 0.000378299 |
| rs584768   | 19:49213284:A:G     | GTEEx   | Skin_Not_Sun_Exposed_Suprapubic | <i>NTN5</i>          | 1.44E-06  | 0.000506735 |
| rs584768   | 19:49213284:A:G     | GTEEx   | Testis                          | <i>IZUMO1</i>        | 2.42E-06  | 0.000378299 |
| rs584768   | 19:49213284:A:G     | GTEEx   | Skin_Sun_Exposed_Lower_leg      | <i>SECIP</i>         | 1.80E-06  | 0.00028813  |
| rs584768   | 19:49213284:A:G     | GTEEx   | Cells_Transformed_fibroblasts   | <i>FUT2</i>          | 8.81E-08  | 0.00020866  |
| rs584768   | 19:49213284:A:G     | GTEEx   | Muscle_Skeletal                 | <i>MAMSTR</i>        | 1.86E-07  | 0.00030405  |
| rs584768   | 19:49213284:A:G     | GTEEx   | Pancreas                        | <i>FUT2</i>          | 1.72E-19  | 0.00061307  |
| rs584768   | 19:49213284:A:G     | GTEEx   | Nerve_Tibial                    | <i>NTN5</i>          | 2.66E-06  | 0.00022679  |
| rs584768   | 19:49213284:A:G     | GTEEx   | Thyroid                         | <i>NTN5</i>          | 1.72E-11  | 0.000224494 |
| rs584768   | 19:49213284:A:G     | GTEEx   | Lung                            | <i>SECIP</i>         | 6.62E-06  | 0.001906954 |
| rs584768   | 19:49213284:A:G     | GTEEx   | Lung                            | <i>IZUMO1</i>        | 4.47E-07  | 0.00038378  |
| rs584768   | 19:49213284:A:G     | GTEEx   | Lung                            | <i>FUT2</i>          | 3.95E-06  | 0.00303134  |
| rs584768   | 19:49213284:A:G     | GTEEx   | Heart_Left_Ventricle            | <i>MAMSTR</i>        | 6.93E-09  | 0.000596884 |
| rs584768   | 19:49213284:A:G     | GTEEx   | Heart_Atrial_Appendage          | <i>MAMSTR</i>        | 2.56E-06  | 0.000720745 |

|           |                 |         |                               |               |          |             |
|-----------|-----------------|---------|-------------------------------|---------------|----------|-------------|
| rs584768  | 19:49213284:A:G | GTEEx   | Esophagus_Mucosa              | <i>FUT2</i>   | 6.87E-60 | 0.000312239 |
| rs584768  | 19:49213284:A:G | GTEEx   | Esophagus_Mucosa              | <i>RASIP1</i> | 1.00E-10 | 0.000312239 |
| rs584768  | 19:49213284:A:G | GTEEx   | Colon_Transverse              | <i>FUT2</i>   | 1.96E-09 | 0.000674021 |
| rs584768  | 19:49213284:A:G | GTEEx   | Adrenal_Gland                 | <i>IZUMO1</i> | 9.88E-08 | 0.000904241 |
| rs584768  | 19:49213284:A:G | GTEEx   | Cells_Transformed_fibroblasts | <i>RASIP1</i> | 9.97E-19 | 0.00020866  |
| rs584768  | 19:49213284:A:G | GTEEx   | Thyroid                       | <i>SECIP</i>  | 3.66E-07 | 0.000224494 |
| rs2089657 | 2:30470178:C:T  | BIOSQTL | BIOS_eQTL_geneLevel           | <i>LBH</i>    | 3.88E-25 | 0           |
| rs2089657 | 2:30470178:C:T  | BIOSQTL | BIOS_eQTL_geneLevel           | <i>LBH</i>    | 1.45E-21 | 0           |
| rs2089657 | 2:30470178:C:T  | GTEEx   | Artery_Tibial                 | <i>LBH</i>    | 1.25E-05 | 0.000705943 |
| rs2089657 | 2:30470178:C:T  | GTEEx   | Heart_Left_Ventricle          | <i>LBH</i>    | 5.90E-06 | 0.005737529 |

**Supplemental Table 8. Results from FUMA tissue enrichment analysis.**

| <b>Category</b>    | <b>GeneSet</b>                        | <b>N (genes)</b> | <b>N (overlap)</b> | <b>P-value</b> |
|--------------------|---------------------------------------|------------------|--------------------|----------------|
| <i>DEG.twoside</i> | Adipose_Visceral_Omentum              | 2587             | 17                 | 7.58E-05       |
| <i>DEG.twoside</i> | Cervix_Endocervix                     | 8                | 1                  | 0.000189687    |
| <i>DEG.twoside</i> | Breast_Mammary_Tissue                 | 2162             | 14                 | 0.00037053     |
| <i>DEG.twoside</i> | Stomach                               | 2429             | 15                 | 0.00040368     |
| <i>DEG.twoside</i> | Artery_Coronary                       | 2192             | 13                 | 0.001375979    |
| <i>DEG.twoside</i> | Colon_Transverse                      | 2780             | 15                 | 0.001761151    |
| <i>DEG.twoside</i> | Brain_Cerebellum                      | 6852             | 28                 | 0.002106769    |
| <i>DEG.twoside</i> | Uterus                                | 2872             | 15                 | 0.002473014    |
| <i>DEG.twoside</i> | Muscle_Skeletal                       | 6031             | 25                 | 0.003338148    |
| <i>DEG.twoside</i> | Artery_Tibial                         | 3419             | 16                 | 0.005820147    |
| <i>DEG.twoside</i> | Pancreas                              | 6296             | 25                 | 0.006250959    |
| <i>DEG.twoside</i> | Brain_Cerebellar_Hemisphere           | 6727             | 26                 | 0.007651162    |
| <i>DEG.twoside</i> | Lung                                  | 3240             | 15                 | 0.008188589    |
| <i>DEG.twoside</i> | Adipose_Subcutaneous                  | 2667             | 13                 | 0.008282114    |
| <i>DEG.twoside</i> | Esophagus_Muscularis                  | 2421             | 12                 | 0.00926839     |
| <i>DEG.twoside</i> | Pituitary                             | 5402             | 21                 | 0.016380398    |
| <i>DEG.twoside</i> | Brain_Frontal_Cortex_BA9              | 6776             | 25                 | 0.017080052    |
| <i>DEG.twoside</i> | Heart_Left_Ventricle                  | 6477             | 24                 | 0.018645744    |
| <i>DEG.twoside</i> | Skin_Sun_Exposed_Lower_leg            | 4183             | 17                 | 0.019358038    |
| <i>DEG.twoside</i> | Esophagus_Mucosa                      | 4518             | 18                 | 0.020068389    |
| <i>DEG.twoside</i> | Minor_Salivary_Gland                  | 2398             | 11                 | 0.020997603    |
| <i>DEG.twoside</i> | Thyroid                               | 3952             | 16                 | 0.023514977    |
| <i>DEG.twoside</i> | Brain_Anterior_cingulate_cortex_BA24  | 6966             | 25                 | 0.024358424    |
| <i>DEG.twoside</i> | Brain_Hippocampus                     | 7018             | 25                 | 0.026736819    |
| <i>DEG.twoside</i> | Brain_Nucleus_accumbens_basal_ganglia | 6761             | 24                 | 0.031443093    |
| <i>DEG.twoside</i> | Ovary                                 | 4177             | 16                 | 0.038219363    |
| <i>DEG.twoside</i> | Brain_Cortex                          | 6589             | 23                 | 0.042479315    |
| <i>DEG.twoside</i> | Brain_Putamen_basal_ganglia           | 6966             | 24                 | 0.044406593    |
| <i>DEG.twoside</i> | Small_Intestine_Terminal_Ileum        | 3615             | 14                 | 0.045007563    |
| <i>DEG.twoside</i> | Brain_Hypothalamus                    | 6633             | 23                 | 0.045682794    |
| <i>DEG.twoside</i> | Brain_Substantia_nigra                | 6588             | 22                 | 0.073514875    |
| <i>DEG.twoside</i> | Brain_Spinal_cord_cervical_c-1        | 6596             | 22                 | 0.074387844    |
| <i>DEG.twoside</i> | Skin_Not_Sun_Exposed_Suprapubic       | 4212             | 15                 | 0.07579427     |
| <i>DEG.twoside</i> | Brain_Amygdala                        | 7026             | 23                 | 0.083002673    |
| <i>DEG.twoside</i> | Brain_Caudate_basal_ganglia           | 6697             | 22                 | 0.08605886     |
| <i>DEG.twoside</i> | Bladder                               | 259              | 1                  | 0.149274432    |
| <i>DEG.twoside</i> | Whole_Blood                           | 6935             | 21                 | 0.181835668    |
| <i>DEG.twoside</i> | Adrenal_Gland                         | 3828             | 12                 | 0.199405348    |
| <i>DEG.twoside</i> | Esophagus_Gastroesophageal_Junction   | 2144             | 7                  | 0.200981969    |
| <i>DEG.twoside</i> | Spleen                                | 4937             | 15                 | 0.21471769     |
| <i>DEG.twoside</i> | Heart_Atrial_Appendage                | 4938             | 15                 | 0.214967011    |
| <i>DEG.twoside</i> | Nerve_Tibial                          | 2928             | 9                  | 0.238435113    |
| <i>DEG.twoside</i> | Artery_Aorta                          | 3104             | 9                  | 0.298816785    |

|                    |                                   |       |    |             |
|--------------------|-----------------------------------|-------|----|-------------|
| <i>DEG.twoside</i> | Kidney_Cortex                     | 2413  | 7  | 0.302195859 |
| <i>DEG.twoside</i> | Vagina                            | 2071  | 6  | 0.303970061 |
| <i>DEG.twoside</i> | Testis                            | 10243 | 28 | 0.348457942 |
| <i>DEG.twoside</i> | Cells_Transformed_fibroblasts     | 4440  | 12 | 0.387227203 |
| <i>DEG.twoside</i> | Cells_EBV-transformed_lymphocytes | 6132  | 16 | 0.4543603   |
| <i>DEG.twoside</i> | Liver                             | 6687  | 17 | 0.509182603 |
| <i>DEG.twoside</i> | Prostate                          | 2916  | 7  | 0.510981412 |
| <i>DEG.twoside</i> | Colon_Sigmoid                     | 2391  | 5  | 0.614449565 |
| <i>DEG.twoside</i> | Cervix_Ectocervix                 | 2     | 0  | 1           |
| <i>DEG.twoside</i> | Fallopian_Tube                    | 14    | 0  | 1           |

**Supplemental Table 9. Pathways and gene sets that were found to be enriched in FUMA analysis.**

|                                                                      | GeneSet                                                       | N (genes)                      | N (overlap) | P-value  | Genes                                                                   |                                              |
|----------------------------------------------------------------------|---------------------------------------------------------------|--------------------------------|-------------|----------|-------------------------------------------------------------------------|----------------------------------------------|
| Canonical pathways                                                   | Gata3 pathway                                                 | 16                             | 2           | 3.06E-06 | NFATC2, PRKAR1B                                                         |                                              |
|                                                                      | VEGF signaling pathway                                        | 76                             | 3           | 1.11E-05 | SPHK2, PPP3R1, NFATC2                                                   |                                              |
|                                                                      | VIP pathway                                                   | 27                             | 2           | 1.58E-05 | NFATC2, PRKAR1B                                                         |                                              |
|                                                                      | T-cell receptor/Ca2+ pathway                                  | 29                             | 2           | 1.97E-05 | PPP3R1, NFATC2                                                          |                                              |
|                                                                      | Extracellular matrix glycoproteins                            | 195                            | 4           | 2.76E-05 | NTN5, FBN2, RSPO3, TNC                                                  |                                              |
|                                                                      | GPCR pathway                                                  | 35                             | 2           | 3.49E-05 | NFATC2, PRKAR1B                                                         |                                              |
|                                                                      | Regulation of insulin secretion by glucagon-like peptide1     | 42                             | 2           | 6.07E-05 | RAPGEF3, PRKAR1B                                                        |                                              |
|                                                                      | pid delta np63 pathway                                        | 47                             | 2           | 8.52E-05 | VDR, WWP1                                                               |                                              |
|                                                                      | NFAT pathway                                                  | 54                             | 2           | 1.29E-04 | PPP3R1, NFATC2                                                          |                                              |
|                                                                      | TAp63 pathway                                                 | 54                             | 2           | 1.29E-04 | VDR, WWP1                                                               |                                              |
|                                                                      | NFAT pathway                                                  | 54                             | 2           | 1.29E-04 | NFATC2, PRKAR1B                                                         |                                              |
|                                                                      | Core matrisome                                                | 274                            | 4           | 1.38E-04 | NTN5, FBN2, RSPO3, TNC                                                  |                                              |
|                                                                      | IL-12 pathway                                                 | 63                             | 2           | 2.04E-04 | SPHK2, PPP3R1                                                           |                                              |
|                                                                      | CD8+ T-cell receptor downstream pathway                       | 65                             | 2           | 2.24E-04 | PPP3R1, NFATC2                                                          |                                              |
|                                                                      | Long term potentiation                                        | 70                             | 2           | 2.79E-04 | RAPGEF3, PPP3R1                                                         |                                              |
|                                                                      | Transcriptional regulation of white adipocyte differentiation | 72                             | 2           | 3.04E-04 | NR2F2, EBF1                                                             |                                              |
|                                                                      | B cell receptor signaling pathway                             | 75                             | 2           | 3.42E-04 | PPP3R1, NFATC2                                                          |                                              |
|                                                                      | Opioid signalling                                             | 77                             | 2           | 3.70E-04 | PPP3R1, PRKAR1B                                                         |                                              |
|                                                                      | Integrin cell surface interactions                            | 78                             | 2           | 3.84E-04 | RAPGEF3, TNC                                                            |                                              |
|                                                                      | Apoptosis                                                     | 87                             | 2           | 5.29E-04 | PPP3R1, PRKAR1B                                                         |                                              |
|                                                                      | Regulation of insulin secretion                               | 91                             | 2           | 6.03E-04 | RAPGEF3, PRKAR1B                                                        |                                              |
|                                                                      | T cell receptor signaling pathway                             | 108                            | 2           | 9.92E-04 | PPP3R1, NFATC2                                                          |                                              |
|                                                                      | Integration of energy metabolism                              | 118                            | 2           | 1.28E-03 | RAPGEF3, PRKAR1B                                                        |                                              |
|                                                                      | Axon guidance                                                 | 129                            | 2           | 1.65E-03 | PPP3R1, NFATC2                                                          |                                              |
|                                                                      | Natural killer cell mediated cytotoxicity                     | 132                            | 2           | 1.77E-03 | PPP3R1, NFATC2                                                          |                                              |
|                                                                      | WNT signaling pathway                                         | 149                            | 2           | 2.49E-03 |                                                                         |                                              |
|                                                                      | Biological processes                                          | vasculature development        | 468         | 7        | 1.96E-06                                                                | RAPGEF3:HDAC7:NR2F2:SPHK2:RASIP1:SOX18:RSPO3 |
|                                                                      |                                                               | nucleotide salvage             | 14          | 2        | 2.00E-06                                                                | APRT:UCKL1                                   |
|                                                                      |                                                               | cellular response to vitamin d | 14          | 2        | 2.00E-06                                                                | VDR:TNC                                      |
|                                                                      |                                                               | nucleoside salvage             | 17          | 2        | 3.71E-06                                                                | APRT:UCKL1                                   |
|                                                                      |                                                               | vasculogenesis                 | 59          | 3        | 4.03E-06                                                                | HDAC7:RASIP1:SOX18                           |
|                                                                      |                                                               | blood vessel morphogenesis     | 364         | 6        | 4.17E-06                                                                | RAPGEF3:HDAC7:NR2F2:RASIP1:SOX18:RSPO3       |
| inositol phosphate mediated signaling                                |                                                               | 18                             | 2           | 4.45E-06 | PPP3R1:NFATC2                                                           |                                              |
| lymph vessel development                                             |                                                               | 20                             | 2           | 6.20E-06 | NR2F2:SOX18                                                             |                                              |
| endothelial cell differentiation                                     |                                                               | 72                             | 3           | 8.95E-06 | RAPGEF3:NR2F2:SOX18                                                     |                                              |
| positive regulation of gene expression                               |                                                               | 1729                           | 12          | 1.03E-05 | RAPGEF3:VDR:NR2F2:DBP:MAMSTR:LBH:PPP3R1:NFATC2:PRPF6:SOX18:EBF1:TNC     |                                              |
| positive regulation of transcription from rna polymerase ii promoter |                                                               | 1003                           | 9           | 1.15E-05 | RAPGEF3:VDR:DBP:MAMSTR:PPP3R1:NFATC2:PRPF6:SOX18:EBF1                   |                                              |
| regulation of syncytium formation by plasma membrane fusion          |                                                               | 25                             | 2           | 1.24E-05 | RAPGEF3:NFATC2                                                          |                                              |
| morphogenesis of a branching structure                               |                                                               | 167                            | 4           | 1.31E-05 | VDR:RASIP1:RSPO3:TNC                                                    |                                              |
| cellular response to vitamin                                         |                                                               | 26                             | 2           | 1.40E-05 | VDR:TNC                                                                 |                                              |
| regulation of transcription from rna polymerase ii promoter          |                                                               | 1780                           | 12          | 1.41E-05 | RAPGEF3:HDAC7:VDR:NR2F2:SNAI3:DBP:MAMSTR:PPP3R1:NFATC2:PRPF6:SOX18:EBF1 |                                              |
| positive regulation of potassium ion transmembrane transport         |                                                               | 27                             | 2           | 1.58E-05 | RAPGEF3:KCNJ2                                                           |                                              |
| positive regulation of myotube differentiation                       |                                                               | 29                             | 2           | 1.97E-05 | MAMSTR:NFATC2                                                           |                                              |
| endothelium development                                              |                                                               | 89                             | 3           | 2.08E-05 | RAPGEF3:NR2F2:SOX18                                                     |                                              |
| establishment of endothelial barrier                                 |                                                               | 30                             | 2           | 2.18E-05 | RAPGEF3:SOX18                                                           |                                              |
| maternal placenta development                                        |                                                               | 31                             | 2           | 2.41E-05 | VDR:NR2F2                                                               |                                              |
| response to vitamin d                                                |                                                               | 33                             | 2           | 2.92E-05 | VDR:TNC                                                                 |                                              |
| regulation of body fluid levels                                      |                                                               | 506                            | 6           | 3.49E-05 | VDR:APRT:LBH:PLEK:OPRL1:PRKAR1B                                         |                                              |
| positive regulation of potassium ion transport                       |                                                               | 38                             | 2           | 4.48E-05 | RAPGEF3:KCNJ2                                                           |                                              |
| cellular metabolic compound salvage                                  |                                                               | 38                             | 2           | 4.48E-05 | APRT:UCKL1                                                              |                                              |
| cellular response to nutrient                                        |                                                               | 39                             | 2           | 4.85E-05 | VDR:TNC                                                                 |                                              |
| nucleobase metabolic process                                         |                                                               | 39                             | 2           | 4.85E-05 | APRT:UCKL1                                                              |                                              |
| lactation                                                            |                                                               | 41                             | 2           | 5.64E-05 | VDR:APRT                                                                |                                              |
| regulation of alcohol biosynthetic process                           |                                                               | 45                             | 2           | 7.48E-05 | VDR:PLEK                                                                |                                              |
| endothelial cell development                                         |                                                               | 45                             | 2           | 7.48E-05 | RAPGEF3:SOX18                                                           |                                              |
| positive regulation of biosynthetic process                          |                                                               | 1801                           | 11          | 7.70E-05 | RAPGEF3:VDR:NR2F2:DBP:MAMSTR:LBH:PPP3R1:NFATC2:PRPF6:SOX18:EBF1         |                                              |

|                                                                      |      |   |             |                                               |
|----------------------------------------------------------------------|------|---|-------------|-----------------------------------------------|
| gland development                                                    | 395  | 5 | 7.86E-05    | RAPGEF3:VDR:APRT:DBP:TNC                      |
| cardiovascular system development                                    | 787  | 7 | 8.21E-05    | RAPGEF3:HDAC7:NR2F2:SPHK2:RASIP1:SOX18:RSPO3  |
| circulatory system development                                       | 787  | 7 | 8.21E-05    | RAPGEF3:HDAC7:NR2F2:SPHK2:RASIP1:SOX18:RSPO3  |
| morphogenesis of an epithelium                                       | 400  | 5 | 8.42E-05    | VDR:RASIP1:SOX18:RSPO3:TNC                    |
| positive regulation of actin filament bundle assembly                | 48   | 2 | 9.08E-05    | RAPGEF3:PLEK                                  |
| branching morphogenesis of an epithelial tube                        | 131  | 3 | 9.42E-05    | VDR:RASIP1:TNC                                |
| cellular response to calcium ion                                     | 49   | 2 | 9.66E-05    | CPNE7:CPNE3                                   |
| placenta development                                                 | 138  | 3 | 0.000115131 | VDR:NR2F2:RSPO3                               |
| positive regulation of striated muscle cell differentiation          | 52   | 2 | 0.00011539  | MAMSTR:NFATC2                                 |
| cellular response to external stimulus                               | 264  | 4 | 0.000115705 | HDAC7:VDR:KCNJ2:TNC                           |
| regulation of myotube differentiation                                | 55   | 2 | 0.000136454 | MAMSTR:NFATC2                                 |
| organophosphate biosynthetic process                                 | 450  | 5 | 0.000159961 | APRT:CPNE7:SPHK2:UCKL1:CPNE3                  |
| potassium ion transport                                              | 153  | 3 | 0.000171227 | KCNJ2:SLC12A2:CNGB3                           |
| maternal process involved in female pregnancy                        | 60   | 2 | 0.000176848 | VDR:NR2F2                                     |
| organophosphate metabolic process                                    | 883  | 7 | 0.000180877 | APRT:CPNE7:SULT2B1:SPHK2:PLEK:UCKL1:CPNE3     |
| regulation of potassium ion transmembrane transport                  | 61   | 2 | 0.000185757 | RAPGEF3:KCNJ2                                 |
| angiogenesis                                                         | 293  | 4 | 0.000187927 | RAPGEF3:RASIP1:SOX18:RSPO3                    |
| second messenger mediated signaling                                  | 160  | 3 | 0.000203217 | RAPGEF3:PPP3R1:NFATC2                         |
| epithelium development                                               | 943  | 7 | 0.000281869 | RAPGEF3:VDR:NR2F2:RASIP1:SOX18:RSPO3:TNC      |
| body fluid secretion                                                 | 71   | 2 | 0.000291239 | VDR:APRT                                      |
| tube morphogenesis                                                   | 323  | 4 | 0.000294536 | VDR:RASIP1:SOX18:TNC                          |
| negative regulation of transcription from rna polymerase ii promoter | 739  | 6 | 0.0003611   | HDAC7:VDR:NR2F2:SNAI3:NFATC2:SOX18            |
| regulation of actin filament bundle assembly                         | 77   | 2 | 0.000369889 | RAPGEF3:PLEK                                  |
| tissue morphogenesis                                                 | 533  | 5 | 0.00039552  | VDR:RASIP1:SOX18:RSPO3:TNC                    |
| cellular response to mechanical stimulus                             | 80   | 2 | 0.000413856 | HDAC7:KCNJ2                                   |
| regulation of potassium ion transport                                | 83   | 2 | 0.000461048 | RAPGEF3:KCNJ2                                 |
| embryonic placenta development                                       | 83   | 2 | 0.000461048 | NR2F2:RSPO3                                   |
| nucleoside monophosphate biosynthetic process                        | 83   | 2 | 0.000461048 | APRT:UCKL1                                    |
| cellular response to hormone stimulus                                | 551  | 5 | 0.000471232 | VDR:NR2F2:APRT:PRKAR1B:TNC                    |
| positive regulation of muscle cell differentiation                   | 84   | 2 | 0.000477513 | MAMSTR:NFATC2                                 |
| regulation of striated muscle cell differentiation                   | 85   | 2 | 0.000494349 | MAMSTR:NFATC2                                 |
| response to alcohol                                                  | 362  | 4 | 0.000495286 | VDR:NR2F2:OPRL1:TNC                           |
| phospholipid metabolic process                                       | 364  | 4 | 0.000507801 | CPNE7:SPHK2:PLEK:CPNE3                        |
| regulation of coagulation                                            | 88   | 2 | 0.00054713  | LBH:PLEK                                      |
| regulation of cation transmembrane transport                         | 208  | 3 | 0.000549006 | RAPGEF3:KCNJ2:OPRL1                           |
| response to mechanical stimulus                                      | 210  | 3 | 0.000569059 | HDAC7:KCNJ2:TNC                               |
| calcium mediated signaling                                           | 90   | 2 | 0.000584243 | PPP3R1:NFATC2                                 |
| multi multicellular organism process                                 | 213  | 3 | 0.000600107 | VDR:NR2F2:SPHK2                               |
| gland morphogenesis                                                  | 97   | 2 | 0.000726701 | VDR:TNC                                       |
| positive regulation of cation transmembrane transport                | 97   | 2 | 0.000726701 | RAPGEF3:KCNJ2                                 |
| response to vitamin                                                  | 98   | 2 | 0.000748691 | VDR:TNC                                       |
| reproductive system development                                      | 400  | 4 | 0.000776431 | VDR:NR2F2:RSPO3:TNC                           |
| embryonic organ development                                          | 406  | 4 | 0.000829887 | NR2F2:SOX18:FBN2:RSPO3                        |
| renal system process                                                 | 102  | 2 | 0.000840879 | OPRL1:PRKAR1B                                 |
| phospholipid biosynthetic process                                    | 235  | 3 | 0.000865648 | CPNE7:SPHK2:CPNE3                             |
| response to hormone                                                  | 891  | 6 | 0.00108609  | VDR:NR2F2:APRT:OPRL1:PRKAR1B:TNC              |
| regulation of osteoblast differentiation                             | 112  | 2 | 0.001102032 | HDAC7:FBN2                                    |
| regulation of endothelial cell migration                             | 114  | 2 | 0.001159717 | HDAC7:NR2F2                                   |
| negative regulation of epithelial cell proliferation                 | 115  | 2 | 0.00118926  | VDR:NR2F2                                     |
| response to calcium ion                                              | 115  | 2 | 0.00118926  | CPNE7:CPNE3                                   |
| cellular response to alcohol                                         | 115  | 2 | 0.00118926  | VDR:TNC                                       |
| regulation of calcium ion transmembrane transport                    | 116  | 2 | 0.001219275 | RAPGEF3:OPRL1                                 |
| mammary gland development                                            | 117  | 2 | 0.001249764 | VDR:APRT                                      |
| positive regulation of canonical wnt signaling pathway               | 119  | 2 | 0.001312174 | RSPO3:RNF146                                  |
| glycosyl compound biosynthetic process                               | 120  | 2 | 0.001344102 | APRT:UCKL1                                    |
| positive regulation of nucleocytoplasmic transport                   | 121  | 2 | 0.001376515 | RAPGEF3:PPP3R1                                |
| negative regulation of nitrogen compound metabolic process           | 1513 | 8 | 0.001486461 | HDAC7:VDR:NR2F2:SNAI3:NFATC2:SOX18:OPRL1:WWP1 |
| cellular response to organic cyclic compound                         | 464  | 4 | 0.001498926 | RAPGEF3:VDR:NR2F2:TNC                         |

|              |                                                                                  |      |    |             |                                                            |
|--------------|----------------------------------------------------------------------------------|------|----|-------------|------------------------------------------------------------|
|              | steroid hormone mediated signaling pathway                                       | 125  | 2  | 0.001511075 | VDR:NR2F2                                                  |
|              | negative regulation of protein serine threonine kinase activity                  | 126  | 2  | 0.001545956 | NR2F2:PRKAR1B                                              |
|              | regulation of wound healing                                                      | 126  | 2  | 0.001545956 | LBH:PLEK                                                   |
|              | hepaticobiliary system development                                               | 128  | 2  | 0.001617224 | RAPGEF3:DBP                                                |
|              | regulation of camp metabolic process                                             | 129  | 2  | 0.001653618 | RAPGEF3:OPRL1                                              |
|              | positive regulation of transmembrane transport                                   | 131  | 2  | 0.001727935 | RAPGEF3:KCNJ2                                              |
|              | positive regulation of vasculature development                                   | 133  | 2  | 0.001804312 | RAPGEF3:HDAC7                                              |
|              | protein ubiquitination involved in ubiquitin dependent protein catabolic process | 134  | 2  | 0.001843279 | RNF146:WWP1                                                |
|              | transcription from rna polymerase ii promoter                                    | 721  | 5  | 0.001879612 | VDR:DBP:NFATC2:SOX18:EBF1                                  |
|              | reproduction                                                                     | 1274 | 7  | 0.001979537 | VDR:NR2F2:SPHK2:IZUMO1:OPRL1:RSPO3:TNC                     |
|              | glycerophospholipid metabolic process                                            | 297  | 3  | 0.002043719 | CPNE7:PLEK:CPNE3                                           |
|              | fc epsilon receptor signaling pathway                                            | 141  | 2  | 0.002130809 | PPP3R1:NFATC2                                              |
|              | cellular response to endogenous stimulus                                         | 1006 | 6  | 0.002168361 | RAPGEF3:VDR:NR2F2:APRT:PRKAR1B:TNC                         |
|              | fertilization                                                                    | 144  | 2  | 0.002262081 | NR2F2:IZUMO1                                               |
|              | response to estradiol                                                            | 146  | 2  | 0.002352324 | NR2F2:OPRL1                                                |
|              | regulation of actin filament based process                                       | 311  | 3  | 0.00241388  | RAPGEF3:KCNJ2:PLEK                                         |
|              | in utero embryonic development                                                   | 311  | 3  | 0.00241388  | NR2F2:SOX18:RSPO3                                          |
|              | phosphate containing compound metabolic process                                  | 1973 | 9  | 0.002624305 | APRT:CPNE7:SULT2B1:SPHK2:PPP3R1:PLEK:UCKL1:PRKAR1B:CPNE3   |
|              | regulation of cellular component movement                                        | 771  | 5  | 0.002625511 | RAPGEF3:HDAC7:NR2F2:KCNJ2:CPNE3                            |
|              | positive regulation of wnt signaling pathway                                     | 152  | 2  | 0.002636357 | RSPO3:RNF146                                               |
|              | regulation of muscle cell differentiation                                        | 152  | 2  | 0.002636357 | MAMSTR:NFATC2                                              |
|              | regulation of cyclic nucleotide metabolic process                                | 155  | 2  | 0.002785968 | RAPGEF3:OPRL1                                              |
|              | regulation of metal ion transport                                                | 325  | 3  | 0.002827852 | RAPGEF3:KCNJ2:OPRL1                                        |
|              | cellular response to inorganic substance                                         | 156  | 2  | 0.002836978 | CPNE7:CPNE3                                                |
|              | negative regulation of phosphorus metabolic process                              | 541  | 4  | 0.002915585 | NR2F2:PLEK:OPRL1:PRKAR1B                                   |
|              | negative regulation of phosphate metabolic process                               | 541  | 4  | 0.002915585 | NR2F2:PLEK:OPRL1:PRKAR1B                                   |
|              | hormone mediated signaling pathway                                               | 158  | 2  | 0.002940721 | VDR:NR2F2                                                  |
|              | cation transport                                                                 | 794  | 5  | 0.003035223 | VDR:PIEZO1:KCNJ2:SLC12A2:CNGB3                             |
|              | cellular response to oxygen containing compound                                  | 797  | 5  | 0.003092006 | RAPGEF3:VDR:APRT:PRKAR1B:TNC                               |
|              | regeneration                                                                     | 161  | 2  | 0.003100673 | RAPGEF3:TNC                                                |
|              | tube development                                                                 | 552  | 4  | 0.003177319 | VDR:RASIP1:SOX18:TNC                                       |
|              | response to oxygen containing compound                                           | 1379 | 7  | 0.00322353  | RAPGEF3:VDR:NR2F2:APRT:OPRL1:PRKAR1B:TNC                   |
|              | regulation of epithelial cell migration                                          | 166  | 2  | 0.003378966 | HDAC7:NR2F2                                                |
|              | intracellular receptor signaling pathway                                         | 168  | 2  | 0.003494428 | VDR:NR2F2                                                  |
|              | appendage development                                                            | 169  | 2  | 0.003553055 | NR2F2:FBN2                                                 |
|              | limb development                                                                 | 169  | 2  | 0.003553055 | NR2F2:FBN2                                                 |
|              | ion transmembrane transport                                                      | 820  | 5  | 0.003554208 | PIEZO1:KCNJ2:SLC12A2:WWP1:CNGB3                            |
| GWAS catalog | Hair color                                                                       | 42   | 8  | 4.65E-17    | SNAI3-AS1:SNAI3:RNF166:CTU2:PIEZO1:MIR4722:APRT:GALNS      |
|              | Bipolar disorder                                                                 | 176  | 10 | 1.86E-14    | FAM83E:SPHK2:DBP:CA11:SEC1P:NTN5:FUT2:MAMSTR:RASIP1:IZUMO1 |
|              | Elevated serum carcinoembryonic antigen levels                                   | 14   | 5  | 7.91E-14    | SULT2B1:FAM83E:DBP:CA11:FUT2                               |
|              | Retinal vascular caliber                                                         | 18   | 4  | 1.35E-10    | CA11:FUT2:RASIP1:IZUMO1                                    |
|              | Dietary macronutrient intake                                                     | 7    | 3  | 3.32E-10    | FUT2:RASIP1:IZUMO1                                         |
|              | Beard thickness                                                                  | 36   | 4  | 5.81E-09    | CASZ1:CTC-228N24.3:SLC12A2:FBN2                            |
|              | Intracranial volume                                                              | 7    | 2  | 1.94E-07    | RSPO3:RNF146                                               |
|              | Vitamin B levels in ischemic stroke                                              | 8    | 2  | 3.09E-07    | FUT2:RASIP1                                                |
|              | Tumor biomarkers                                                                 | 10   | 2  | 6.61E-07    | CA11:FUT2                                                  |
|              | Crohn's disease                                                                  | 612  | 8  | 1.47E-06    | SPHK2:DBP:NTN5:FUT2:MAMSTR:RASIP1:IZUMO1:RSPO3             |
|              | Food addiction                                                                   | 13   | 2  | 1.57E-06    | RSPO3:RNF146                                               |
|              | Subcortical brain region volumes                                                 | 15   | 2  | 2.49E-06    | RSPO3:RNF146                                               |
|              | Inflammatory bowel disease                                                       | 719  | 8  | 5.46E-06    | HDAC7:VDR:NTN5:FUT2:MAMSTR:RASIP1:IZUMO1:TNC               |
|              | Prostate cancer                                                                  | 317  | 5  | 2.32E-05    | CALM2P1:UCKL1:ZNF512B:SAMD10:PRPF6                         |
|              | Blood pressure                                                                   | 93   | 3  | 2.47E-05    | CASZ1:EBF1:RSPO3                                           |
|              | Systolic blood pressure                                                          | 114  | 3  | 5.49E-05    | CASZ1:FBN2:EBF1                                            |
|              | Hypertension                                                                     | 55   | 2  | 0.000136454 | CASZ1:EBF1                                                 |
|              | Waist-to-hip ratio adjusted for BMI (adjusted for smoking behaviour)             | 70   | 2  | 0.000279291 | KCNJ2:RSPO3                                                |
|              | Male-pattern baldness                                                            | 77   | 2  | 0.000369889 | EBF1:RSPO3                                                 |
|              | Waist-to-hip ratio adjusted for body mass index                                  | 84   | 2  | 0.000477513 | KCNJ2:RSPO3                                                |
|              | Inflammatory skin disease                                                        | 85   | 2  | 0.000494349 | RASIP1:EBF1                                                |



|                                                          |     |   |             |                         |
|----------------------------------------------------------|-----|---|-------------|-------------------------|
| Hip circumference adjusted for BMI                       | 101 | 2 | 0.000817191 | KCNJ2:RSPO3             |
| Metabolite levels                                        | 115 | 2 | 0.00118926  | PLEK:RSPO3              |
| Cognitive decline rate in late mild cognitive impairment | 122 | 2 | 0.001409416 | NR2F2:EBF1              |
| Diastolic blood pressure                                 | 125 | 2 | 0.001511075 | CASZ1:EBF1              |
| Breast cancer                                            | 139 | 2 | 0.002045997 | EBF1:RNF146             |
| Height                                                   | 512 | 4 | 0.002300743 | LBH:PPP3R1:SLC12A2:FBN2 |
| Multiple sclerosis                                       | 154 | 2 | 0.002735529 | MAMSTR:PLEK             |

**Supplemental Table 10. Results from MR analyses of the association between height and varicose veins.**

**MR results**

| <b>MR analysis method</b> | <b>Numbers of SNPs</b> | <b>OR</b> | <b>SE</b> | <b>P-value</b> | <b>P-value Heterogeneity</b> |
|---------------------------|------------------------|-----------|-----------|----------------|------------------------------|
| Maximum likelihood        | 512                    | 1.262     | 0.027     | 9.12E-18       | 5.57E-02                     |
| MR-Egger                  | 512                    | 1.425     | 0.078     | 6.74E-06       | 6.02E-02                     |
| Inverse-variance weighted | 512                    | 1.260     | 0.028     | 2.07E-16       | 5.68E-02                     |
| Weighted median           | 512                    | 1.282     | 0.044     | 1.79E-08       |                              |

**P-value pleiotropy**

0.091

**MR using all the GWAS significant SNPs for height**

| <b>MR analysis method</b> | <b>Numbers of SNPs</b> | <b>OR</b> | <b>SE</b> | <b>P-value</b> | <b>P-value Heterogeneity</b> |
|---------------------------|------------------------|-----------|-----------|----------------|------------------------------|
| Maximum likelihood        | 536                    | 1.305     | 0.026     | 3.98E-24       | 3.16E-14                     |
| MR-Egger                  | 536                    | 1.526     | 0.086     | 1.23E-06       | 5.49E-14                     |
| Inverse-variance weighted | 536                    | 1.305     | 0.032     | 1.24E-16       | 3.17E-14                     |
| Weighted median           | 536                    | 1.304     | 0.040     | 6.83E-10       |                              |

**P-value pleiotropy**

0.050

**Supplemental Figure 1:** Cox models relating varicose veins to BMI, waist-hip ratio, history of leg artery operation, birth weight of first child, age completed full time education, cellulitis and acute lymphangitis (ICD10: L03), other and unspecified soft tissue disorders; not elsewhere classified (ICD10: M79), non-pressure chronic ulcer of lower limb; not elsewhere classified (ICD10: L97), and history of major operation.

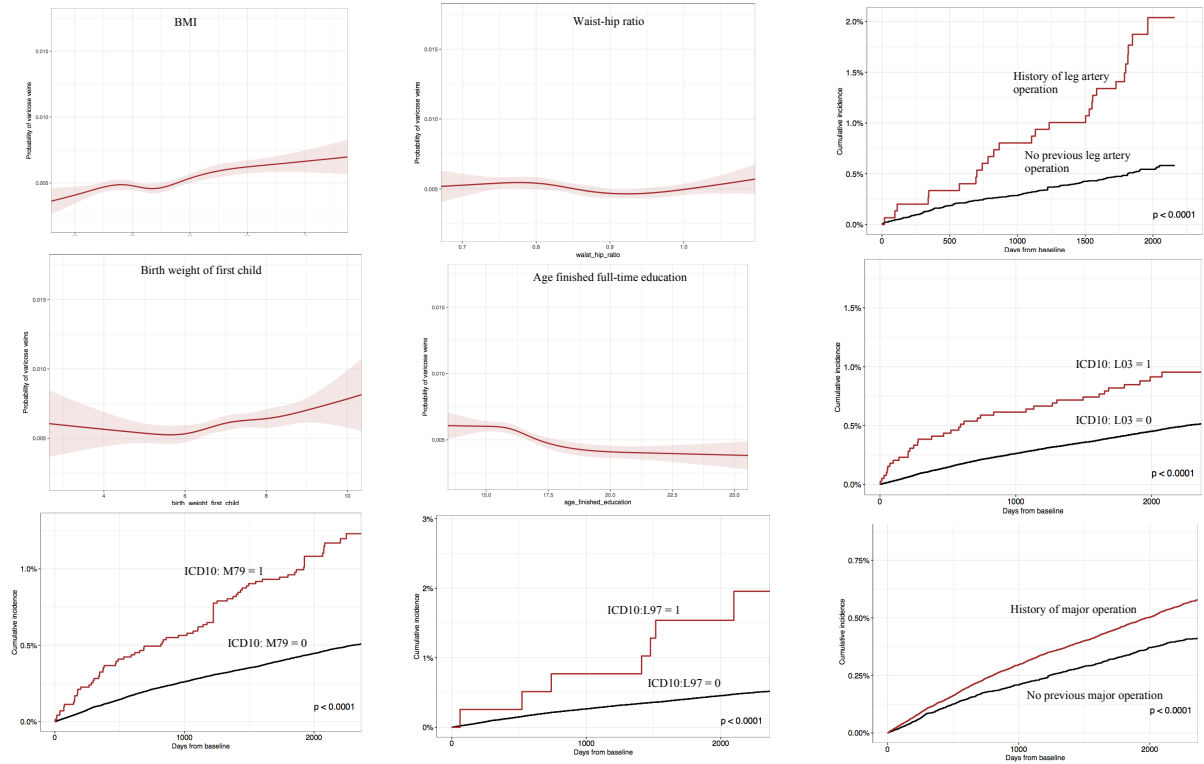

**Supplemental Figure 2:** Quantile-quantile (QQ) of the expected vs. observed log p-values for genome-wide association results for varicose veins.

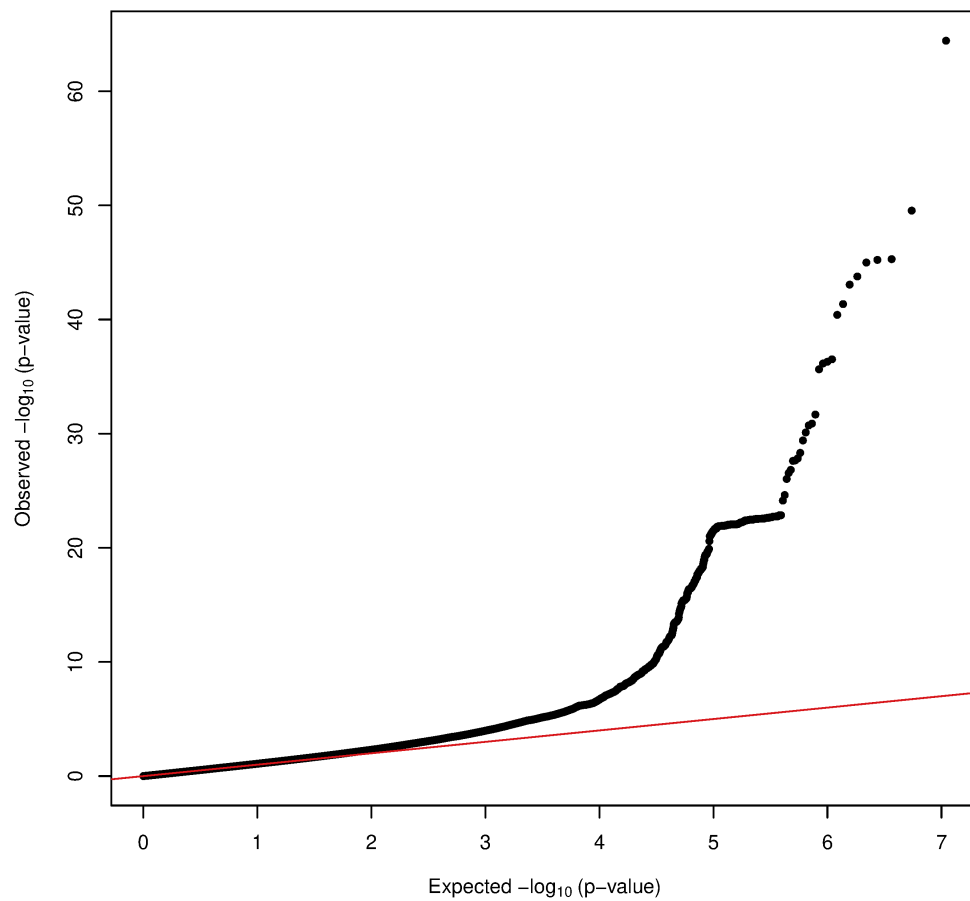

**Supplemental Figure 3:** Regional plots of the 30 novel loci associated with varicose veins.

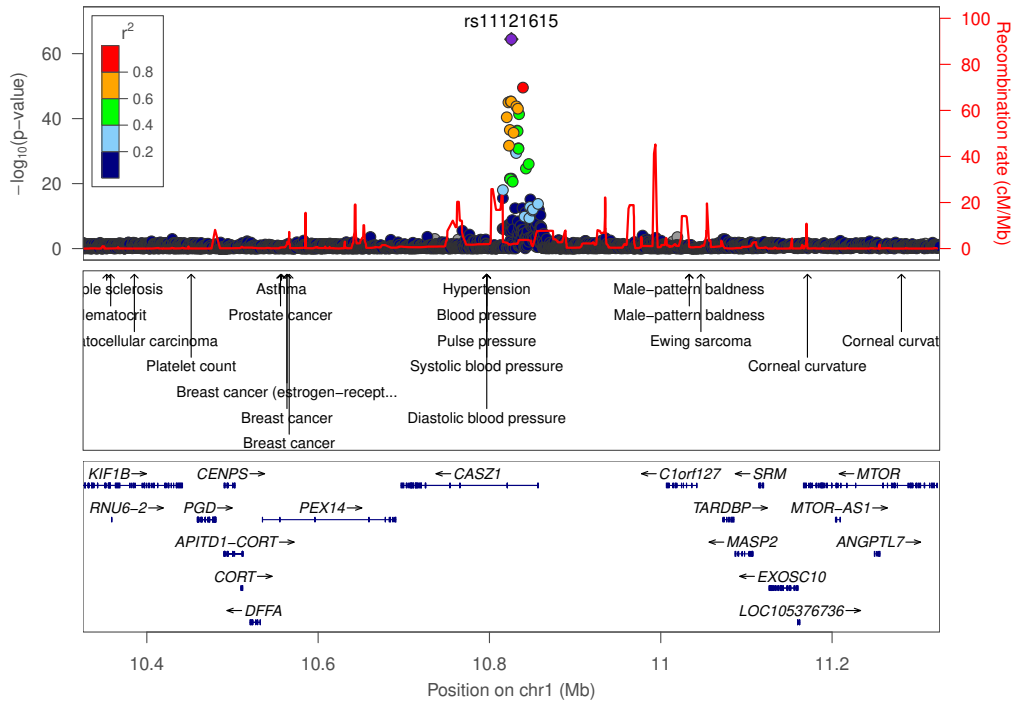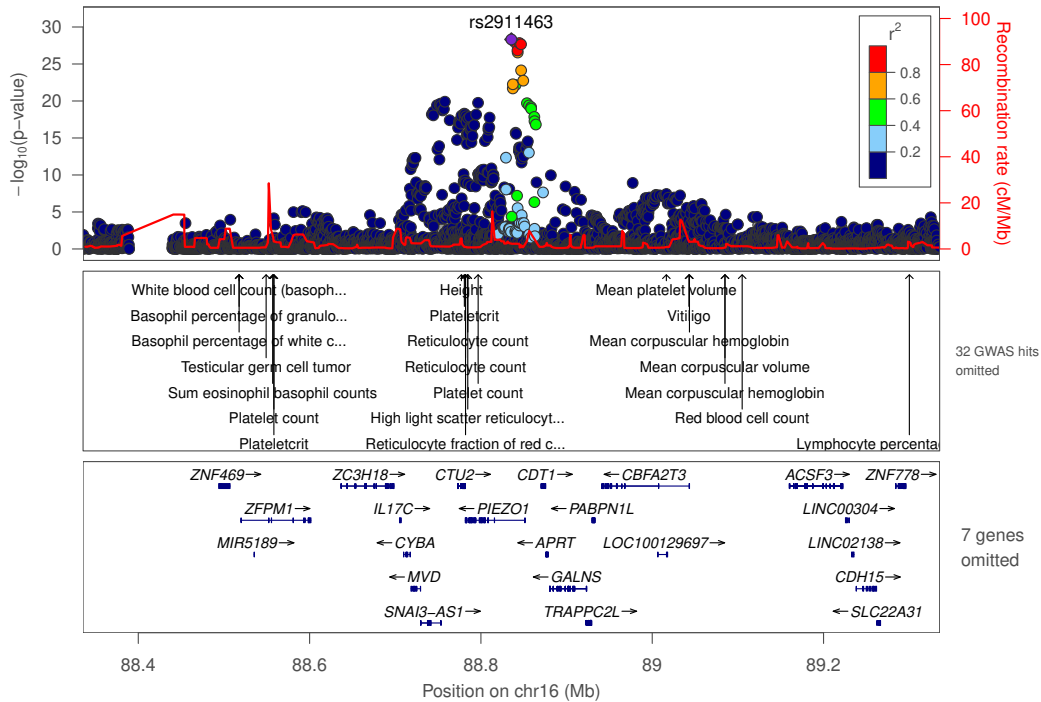

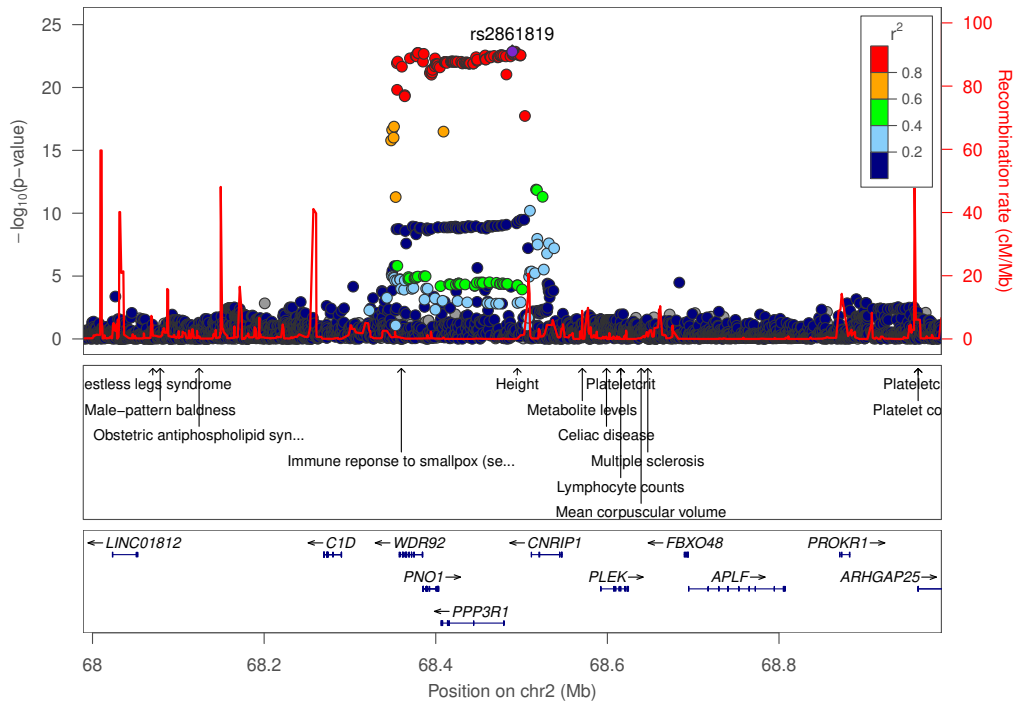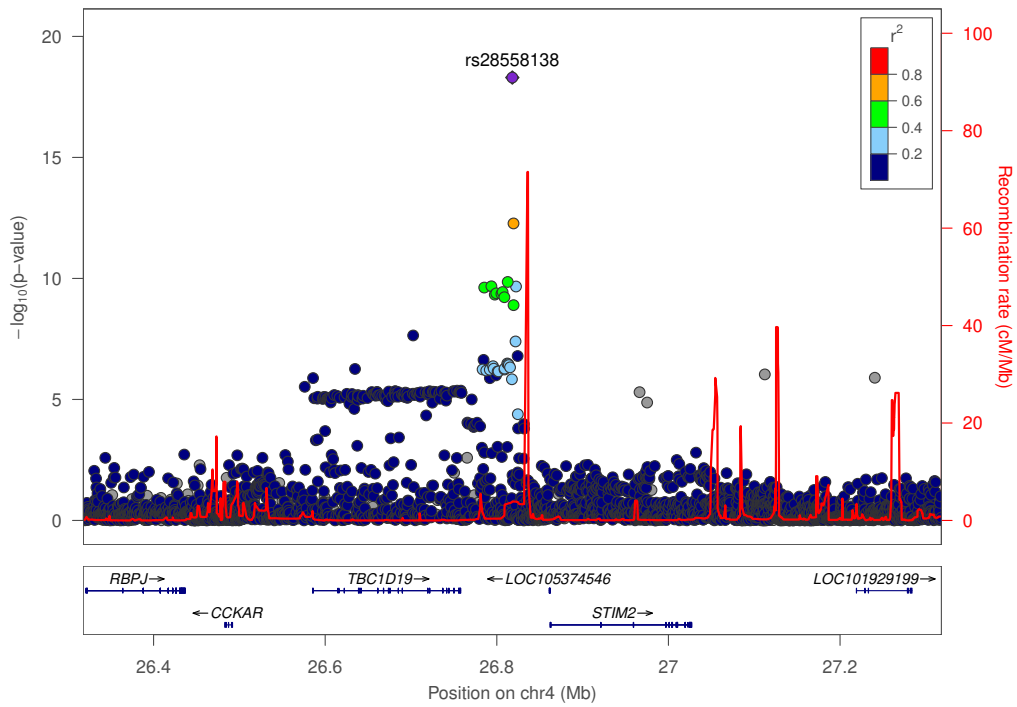

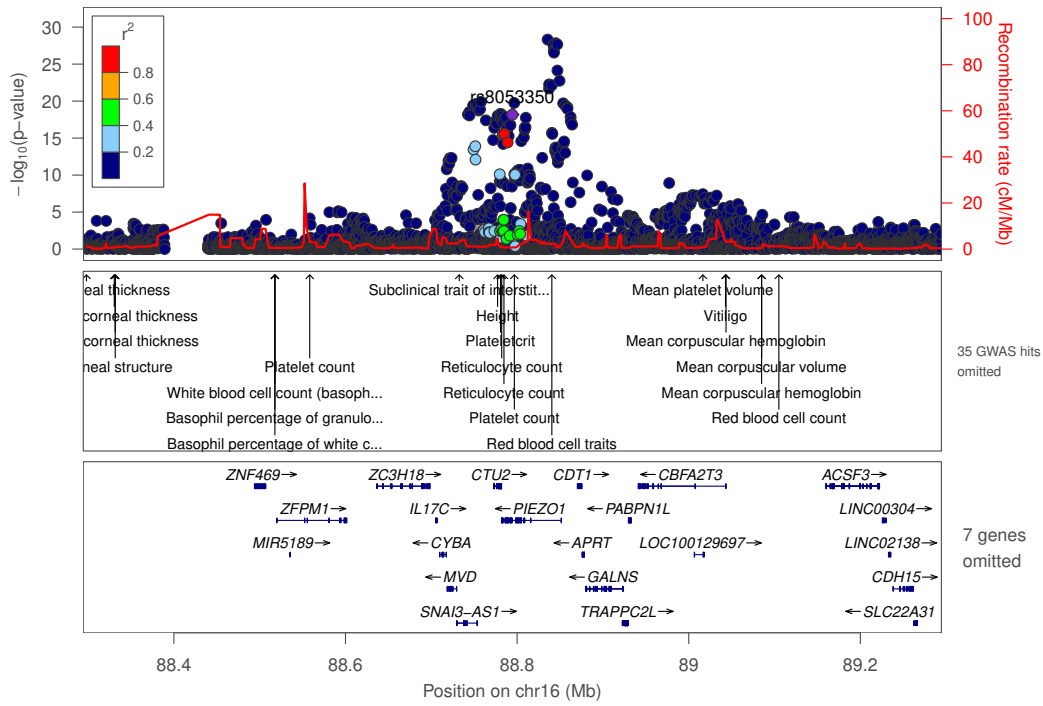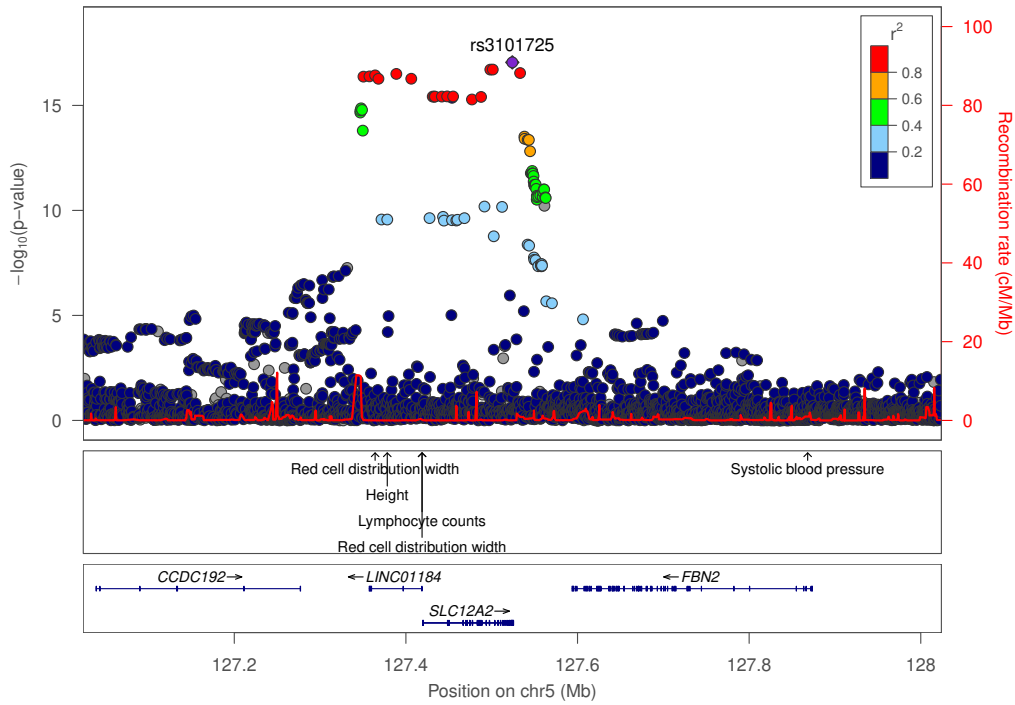

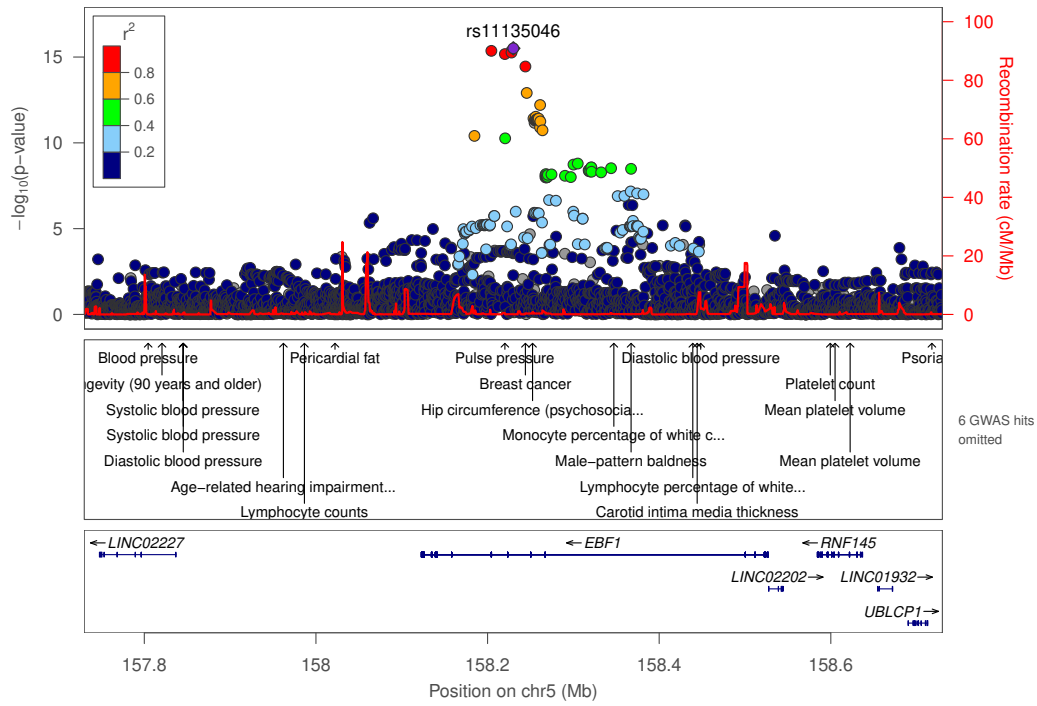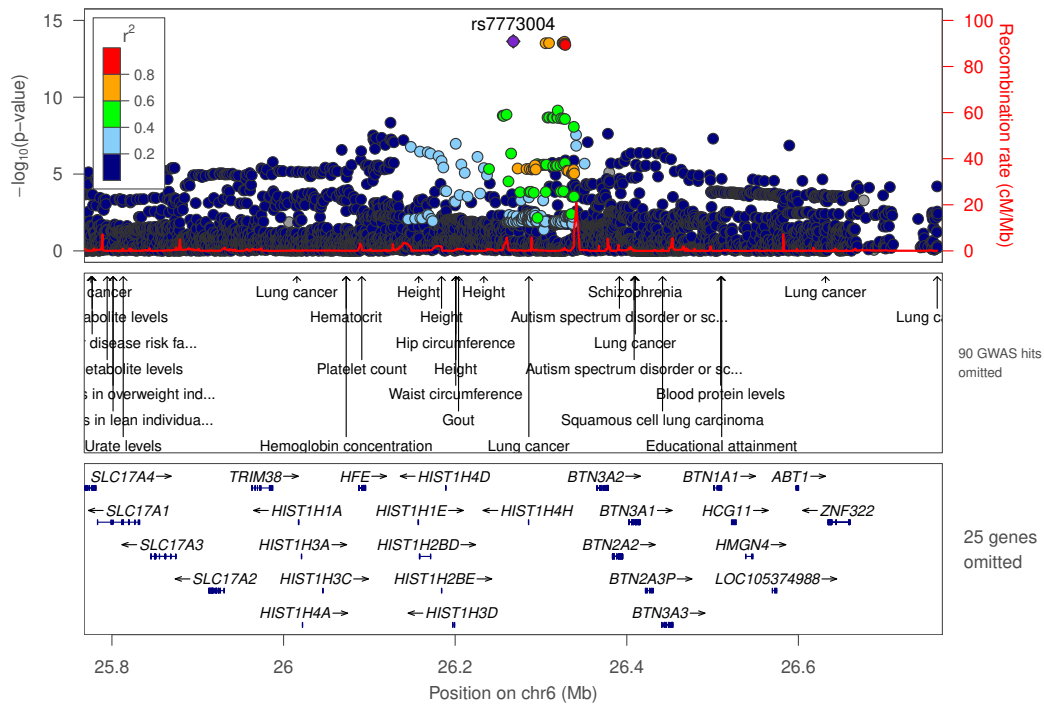



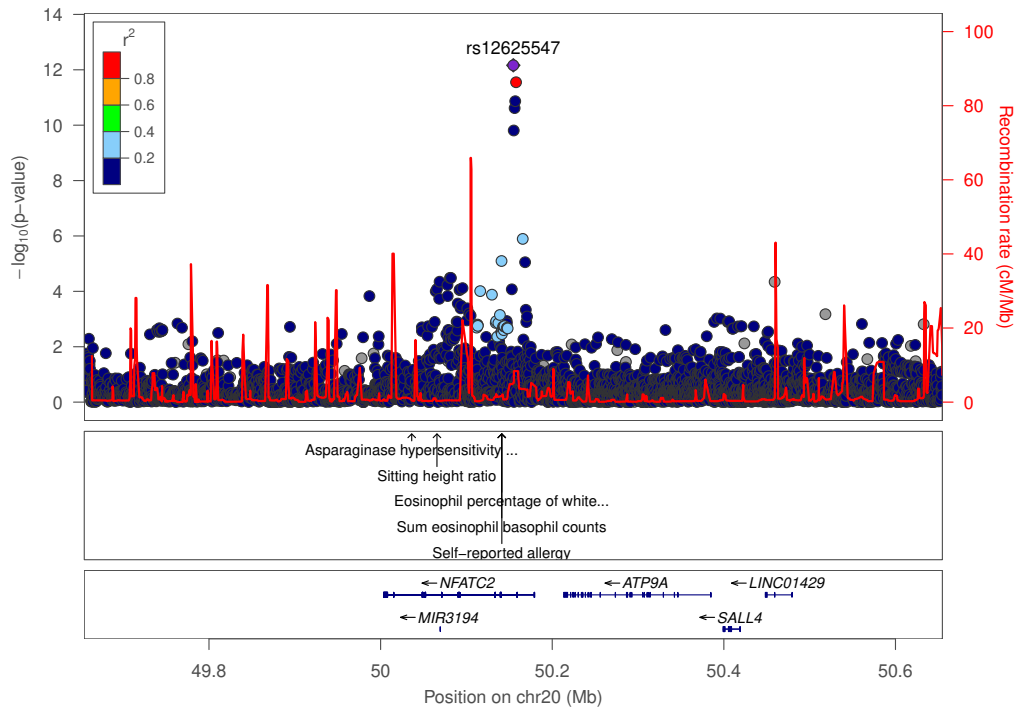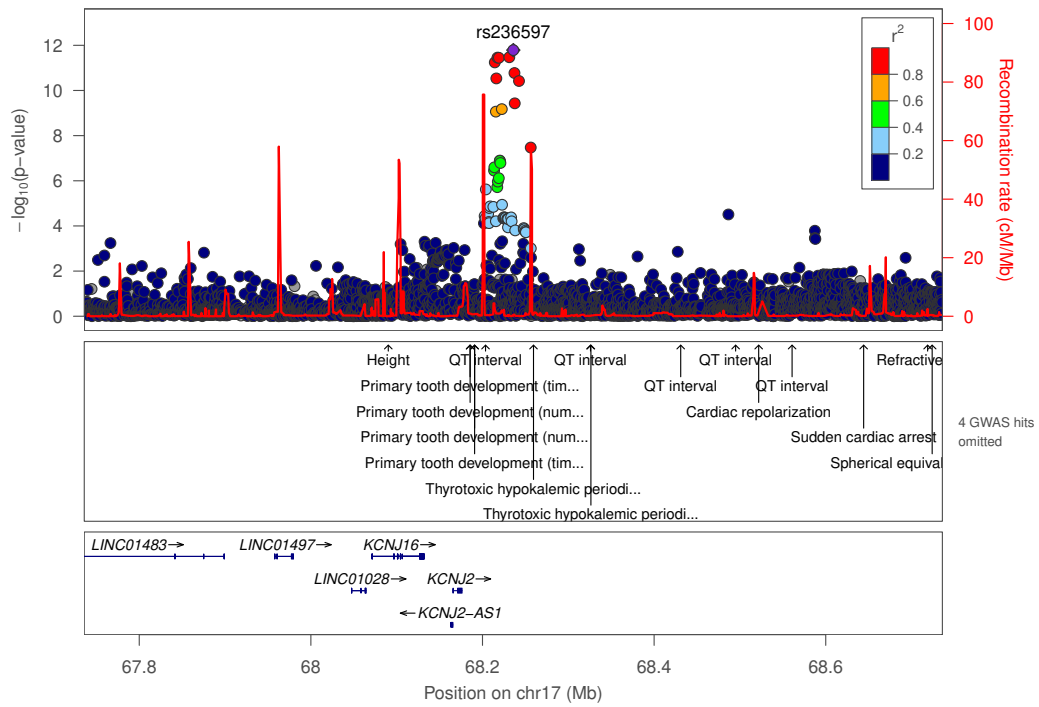

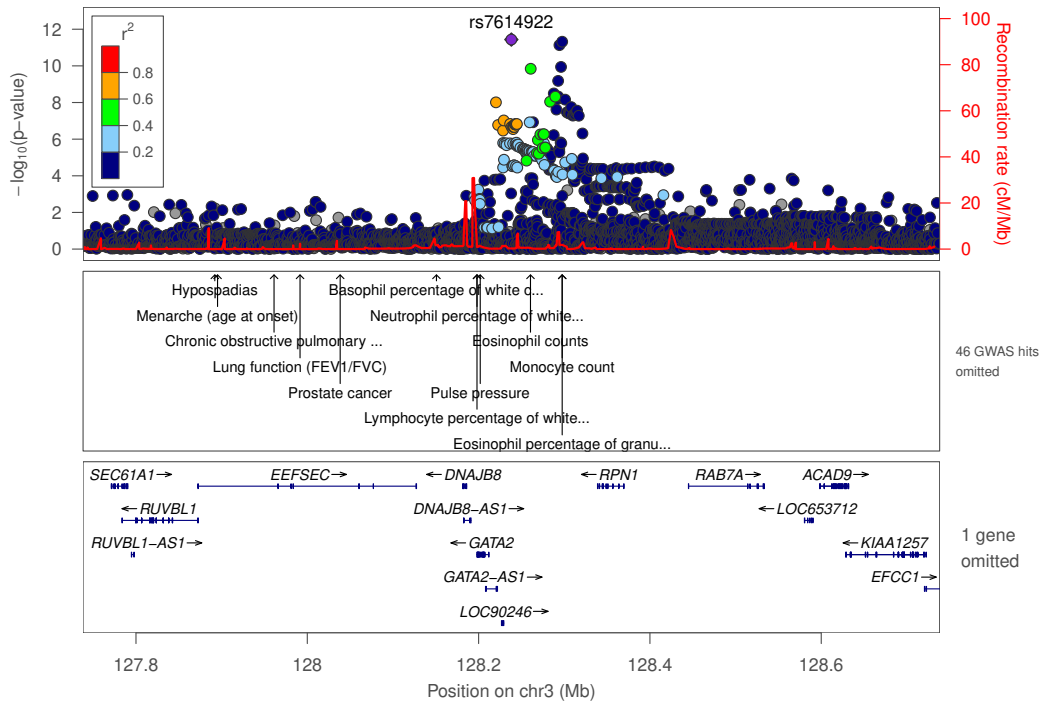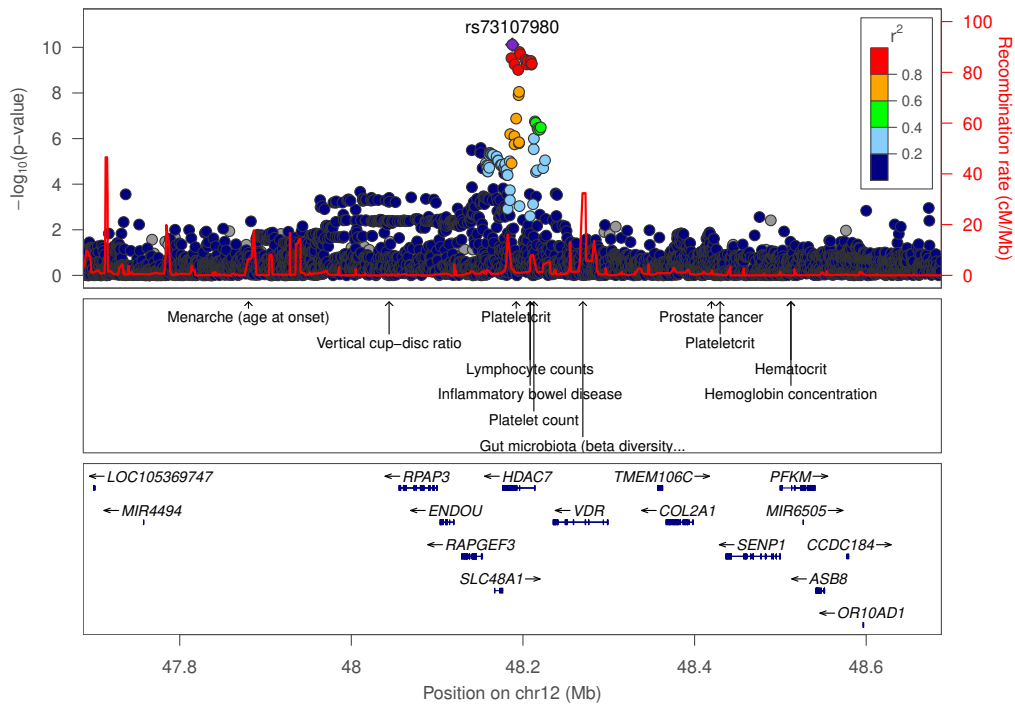

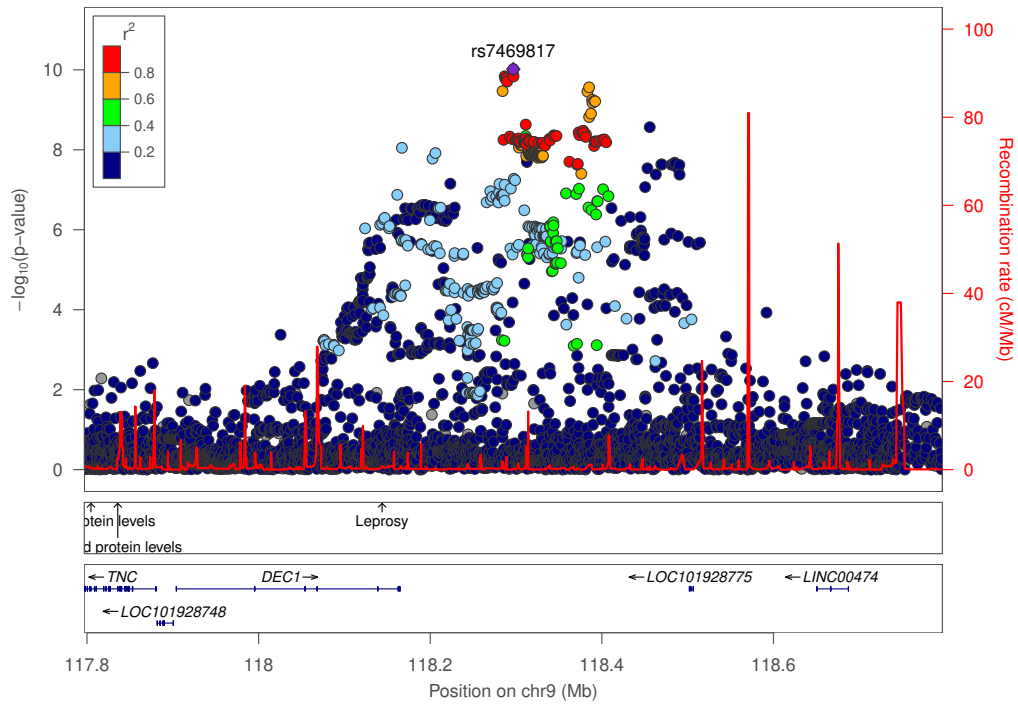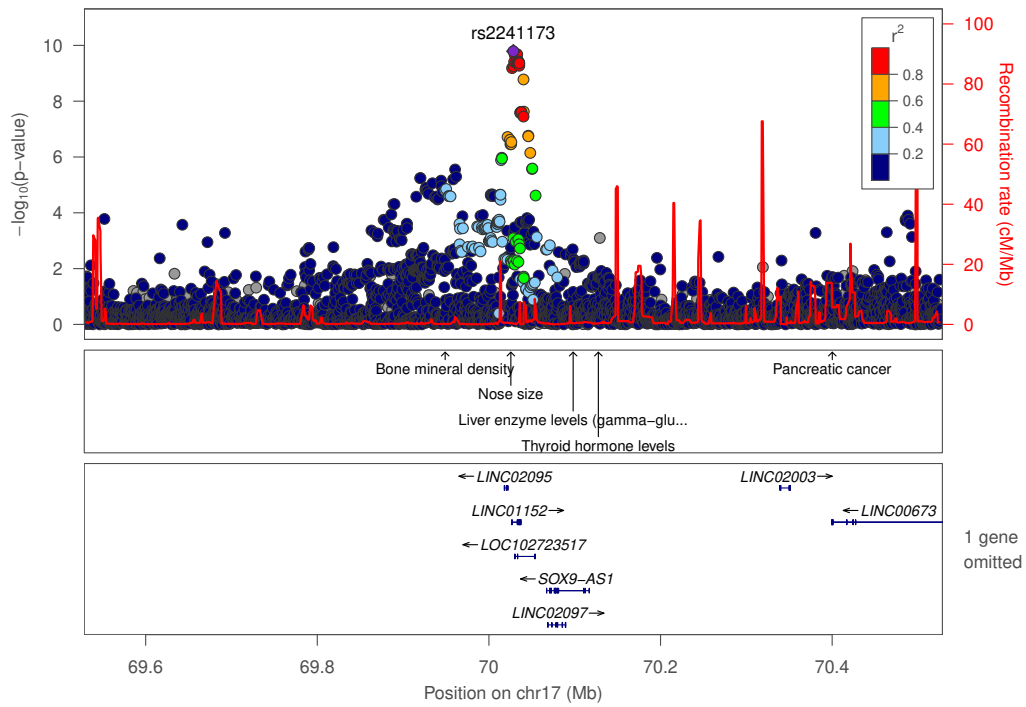

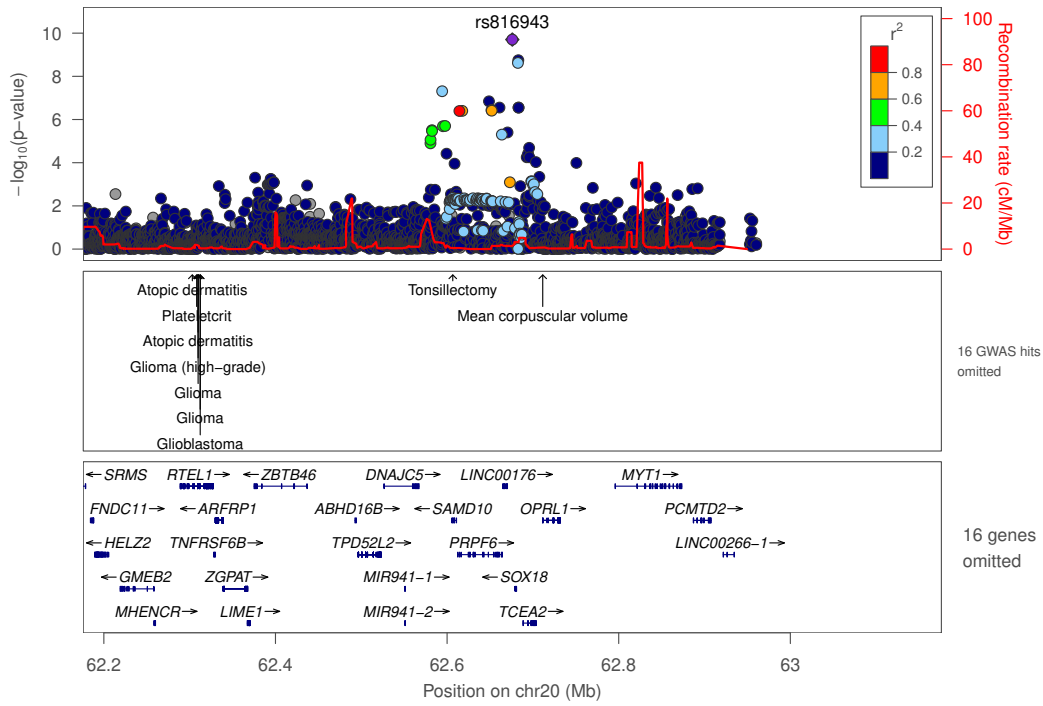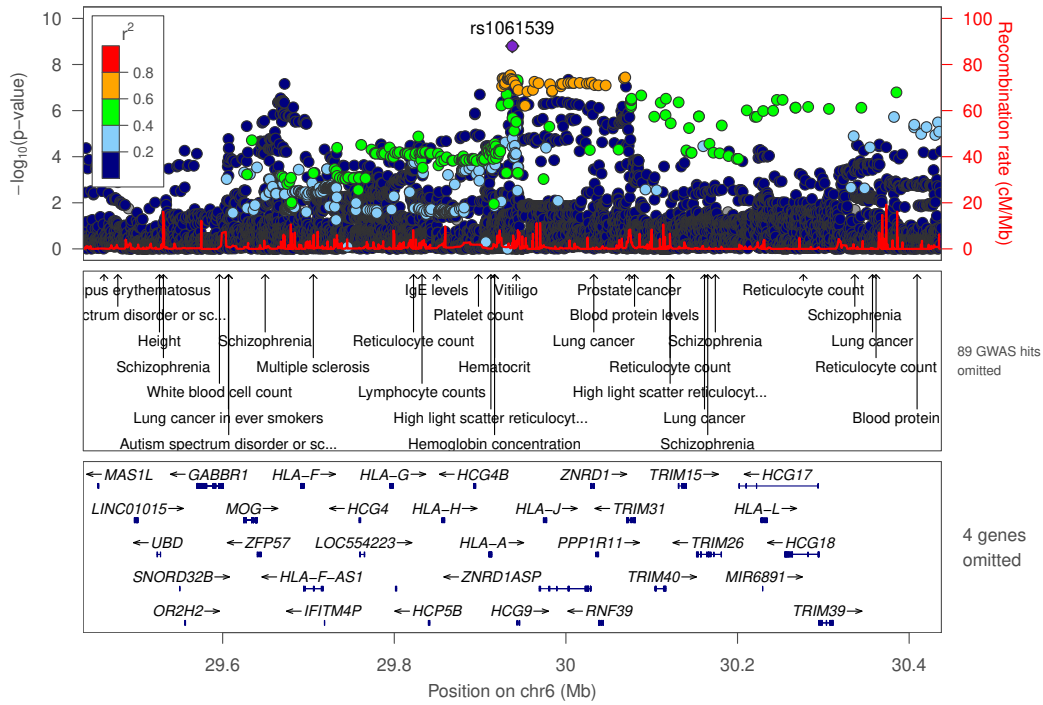

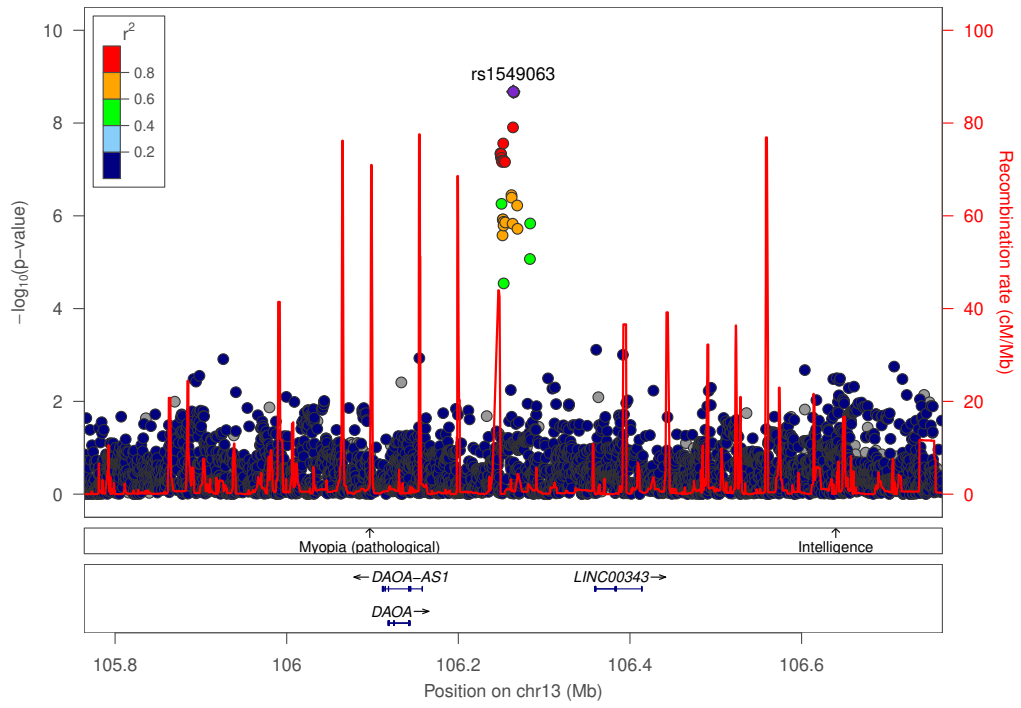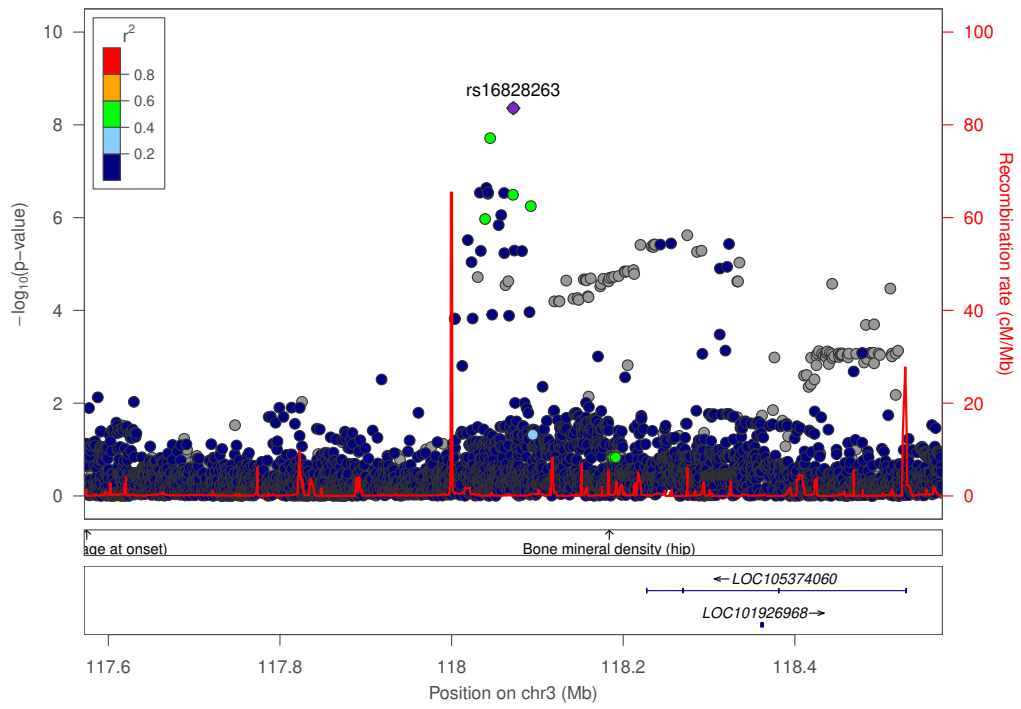

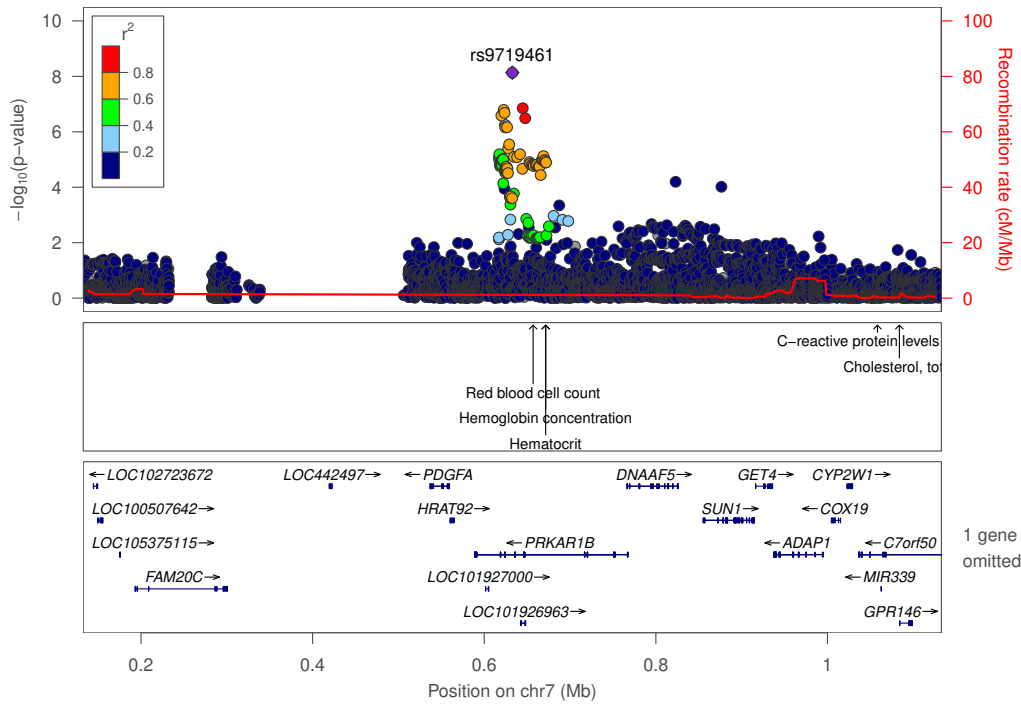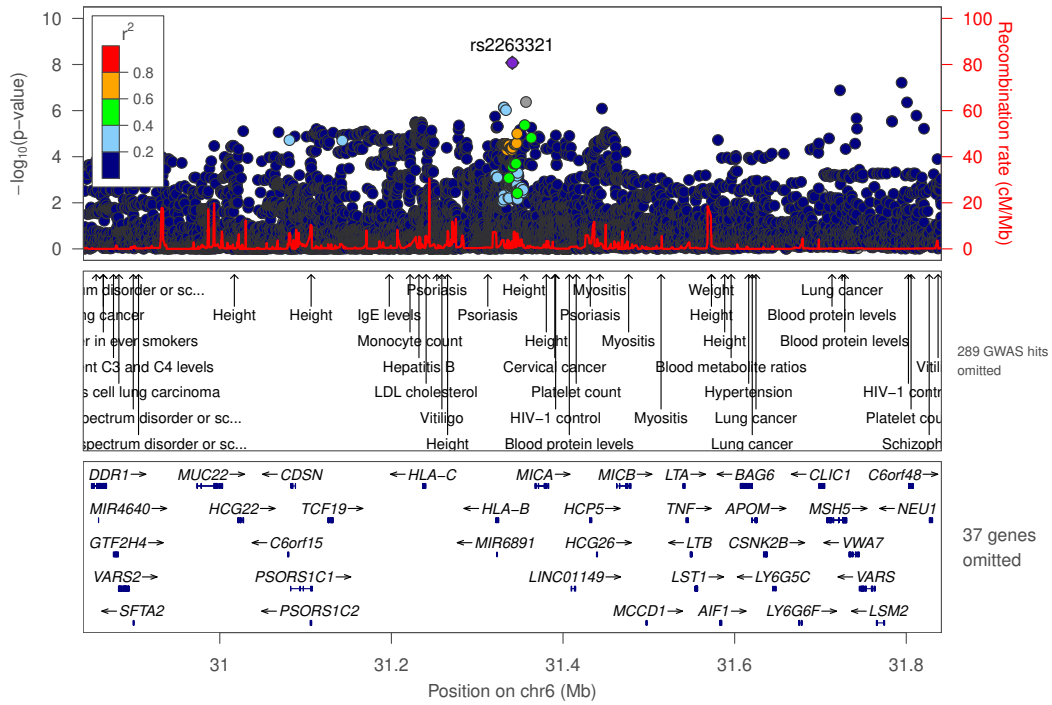

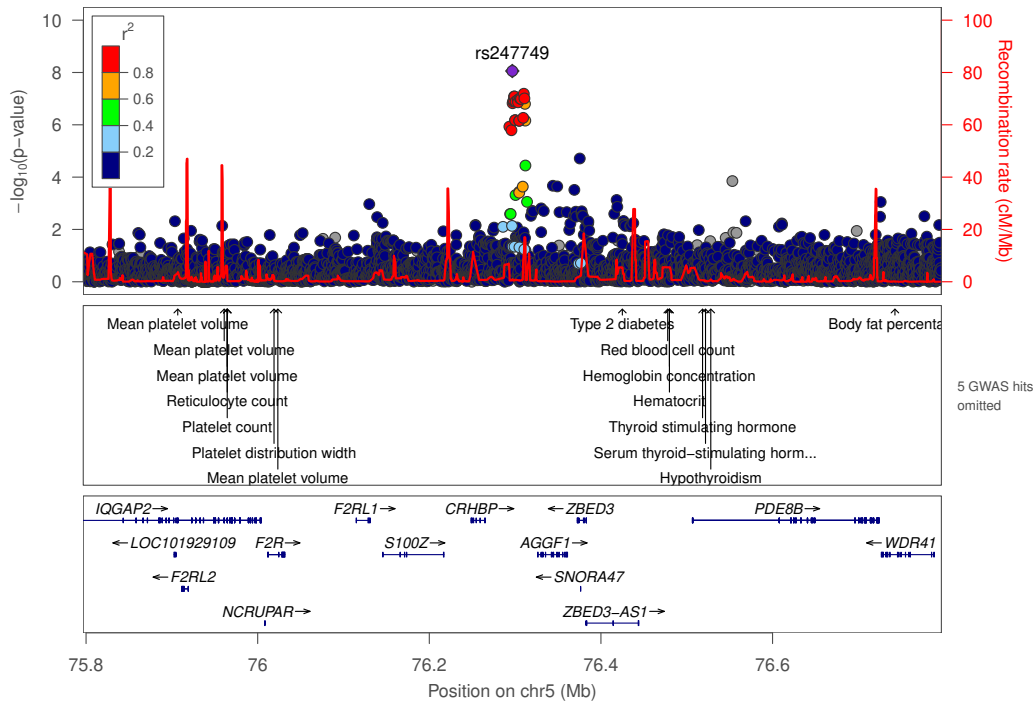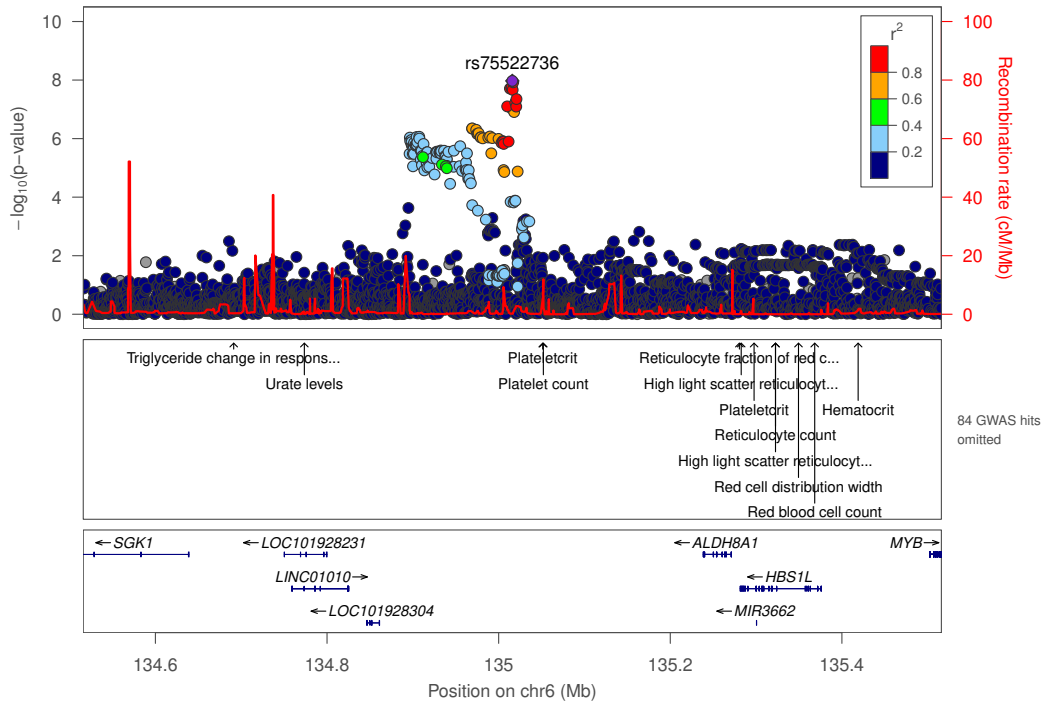

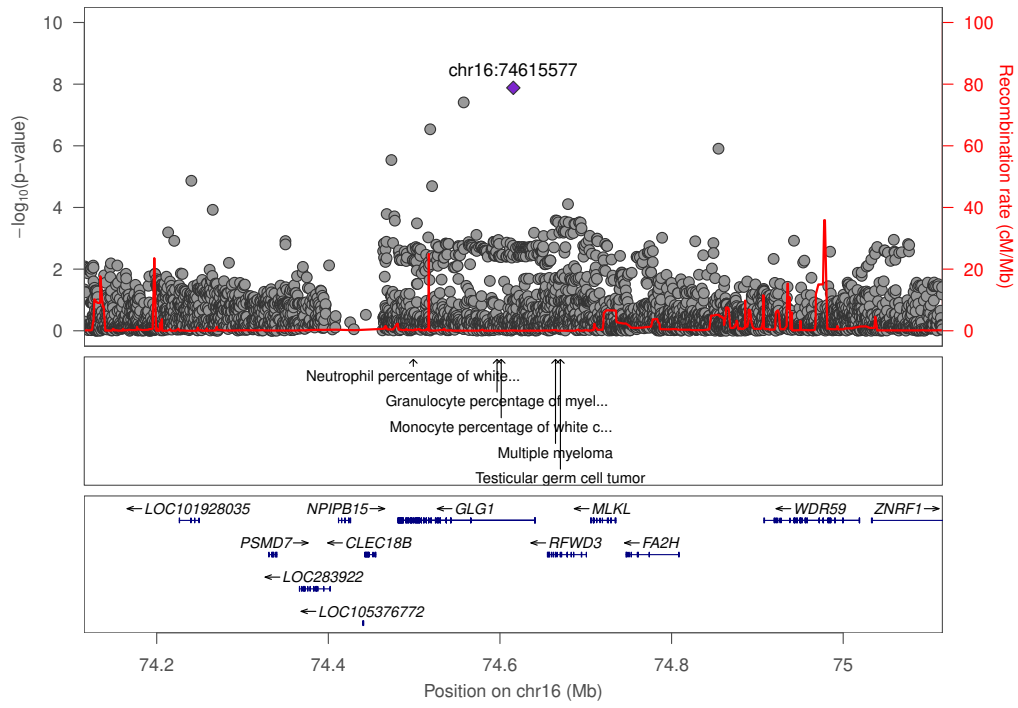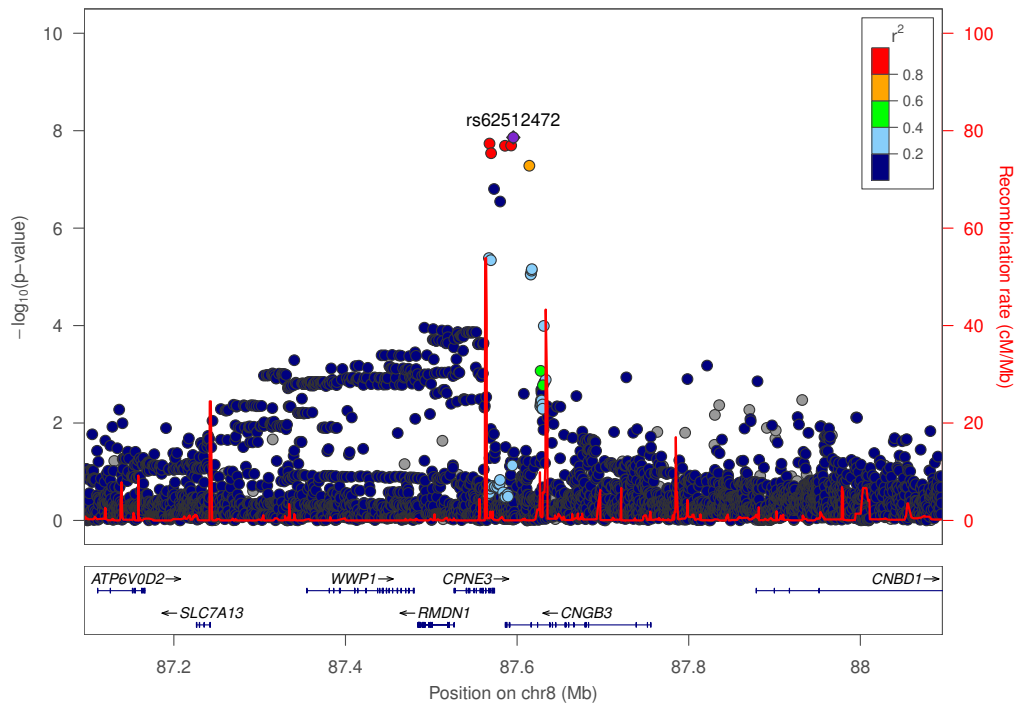



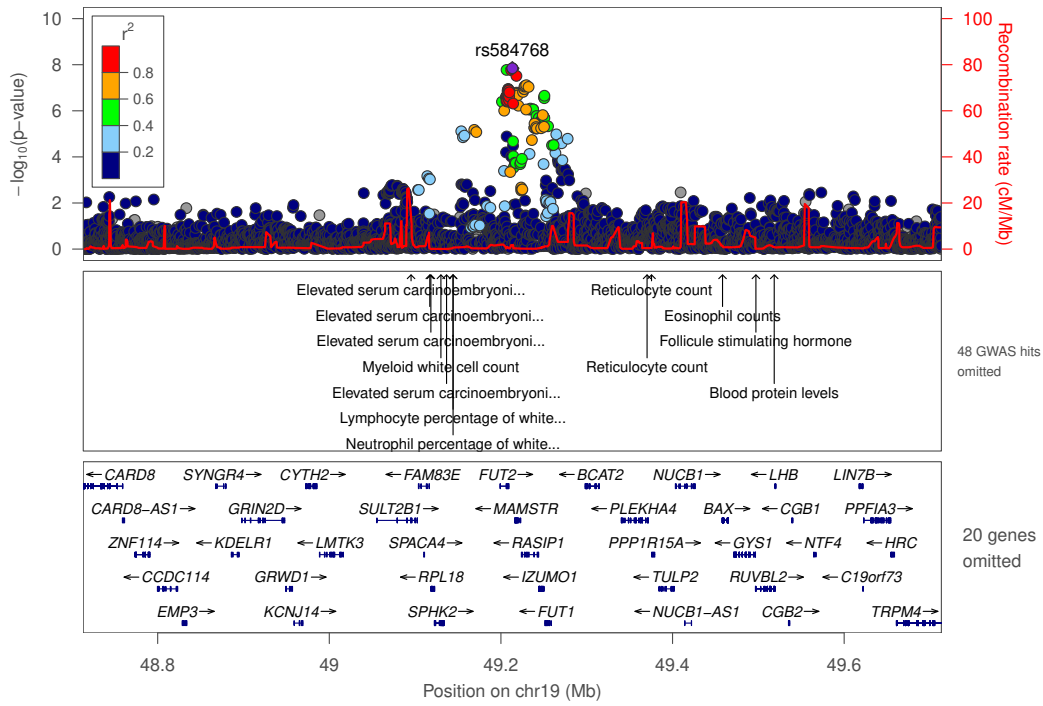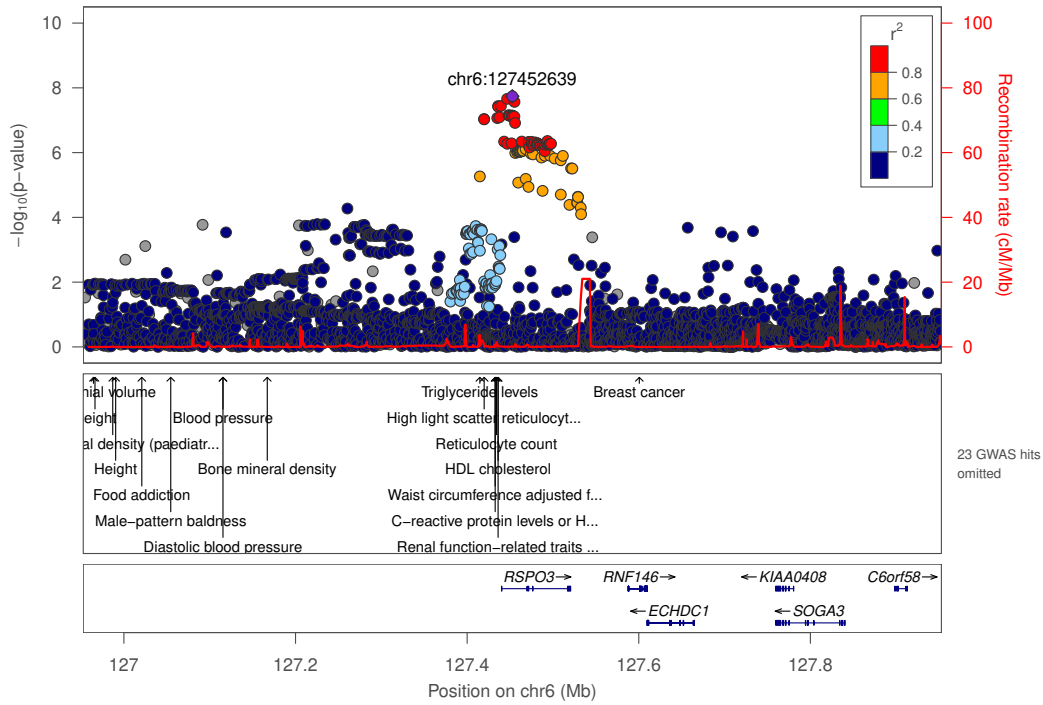

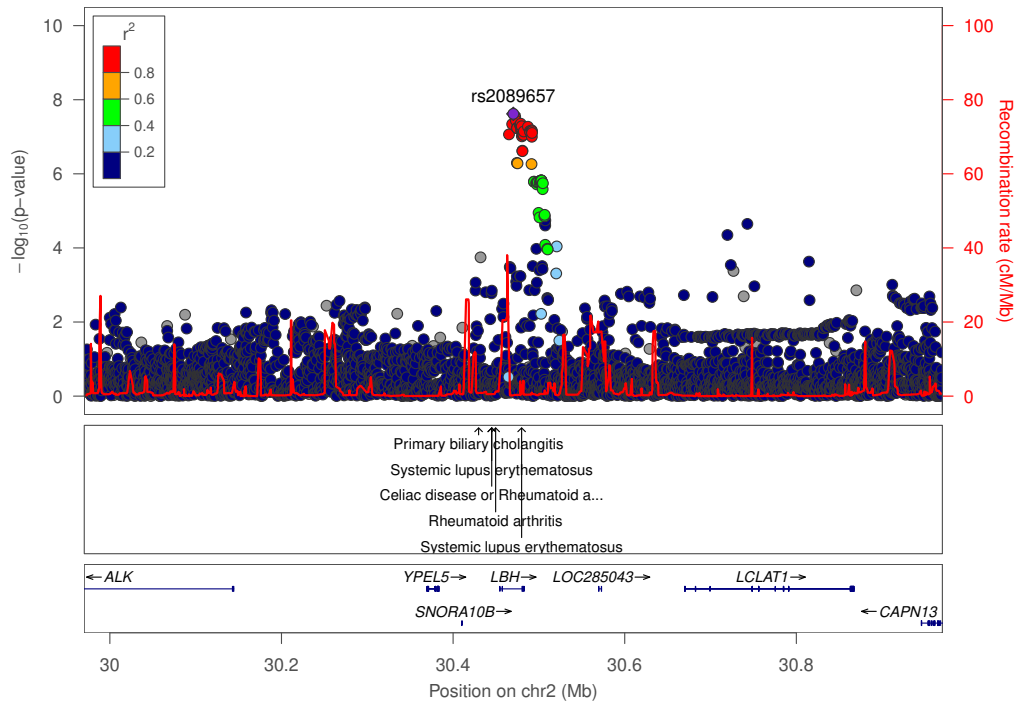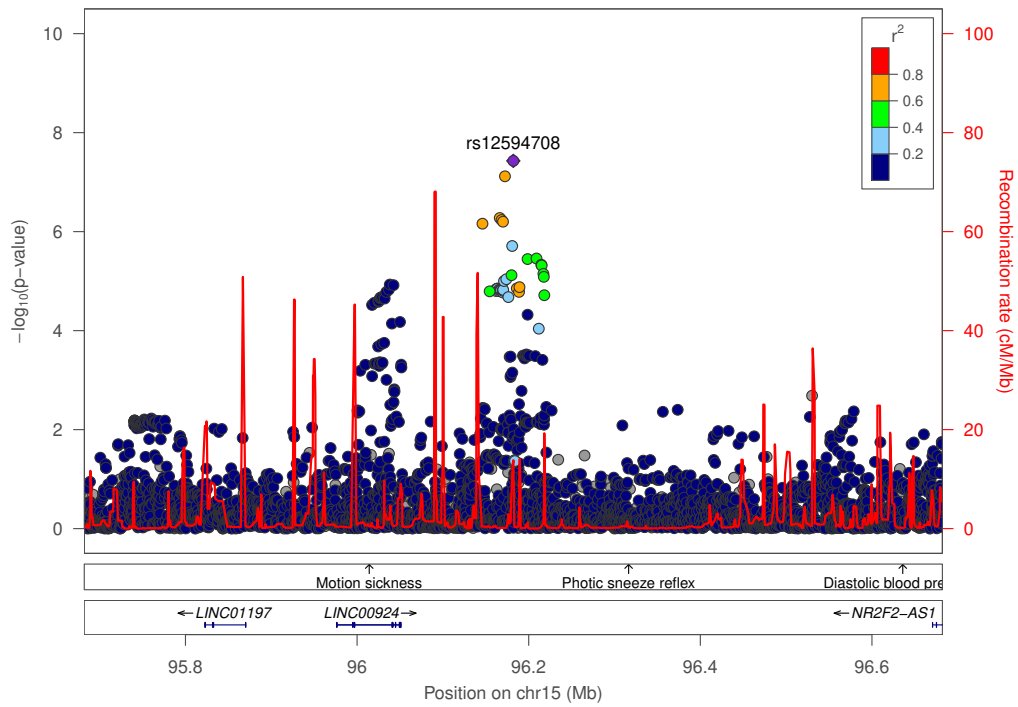

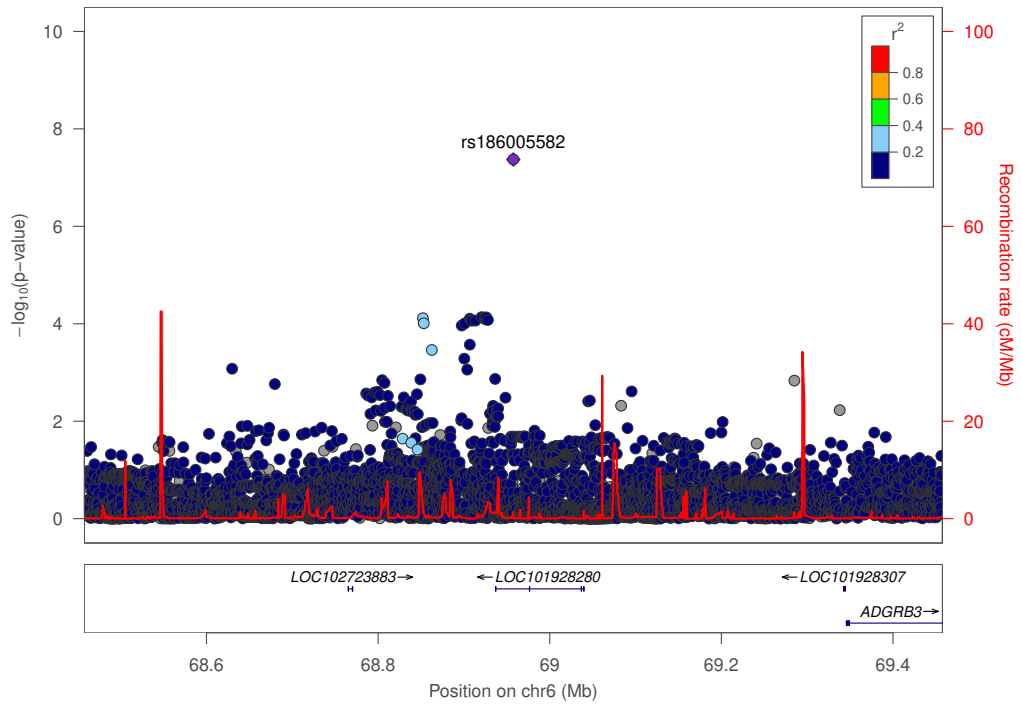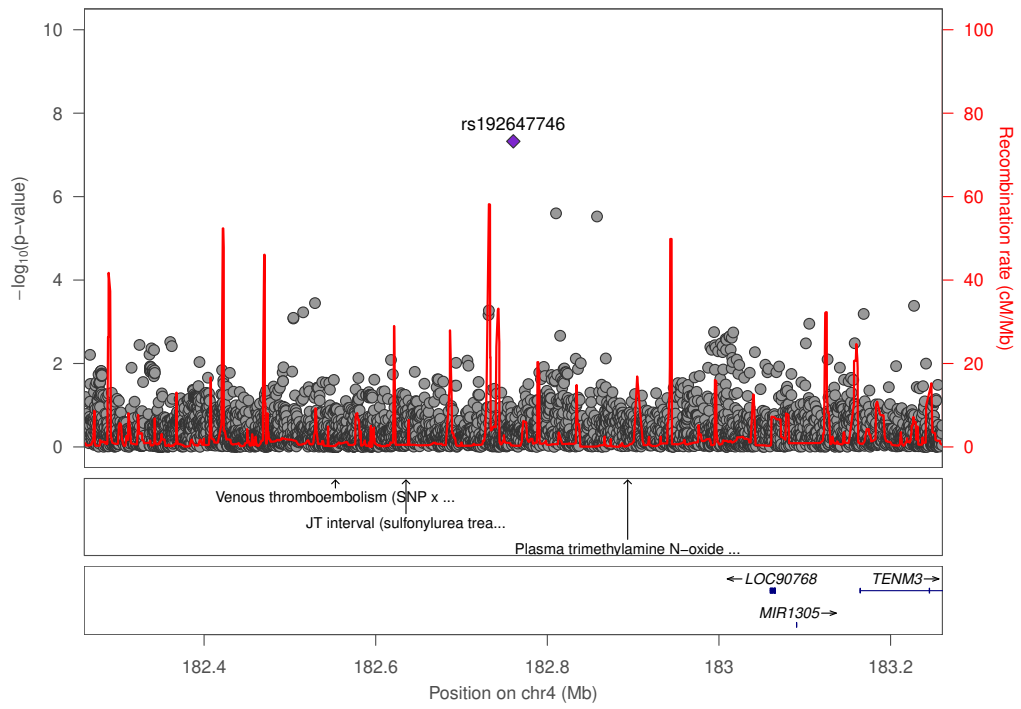

**Supplemental Figure 4:** Scatter and forest plot demonstrating the association between height and varicose veins.

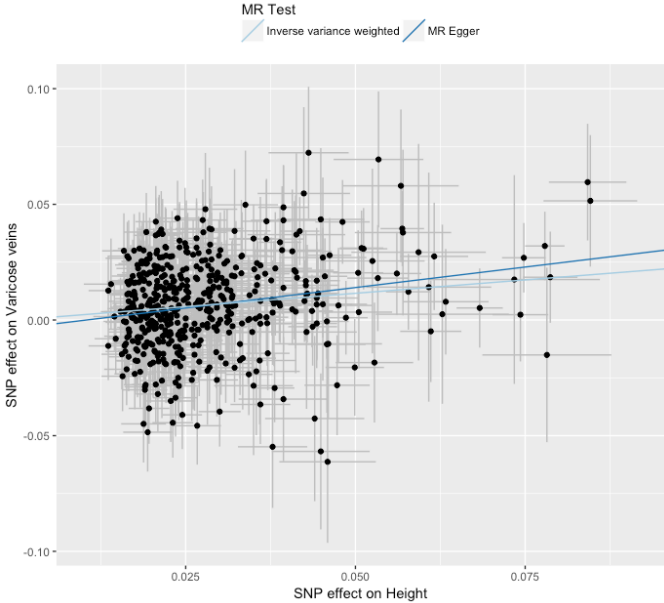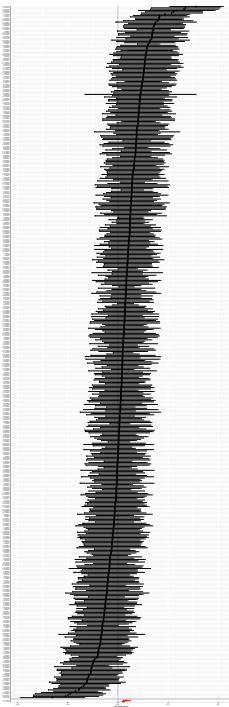

**Supplemental Figure 5:** Leave-one-out sensitivity analysis demonstrating that SNPs associated with height remain associated with varicose veins, implying a causal relationship.

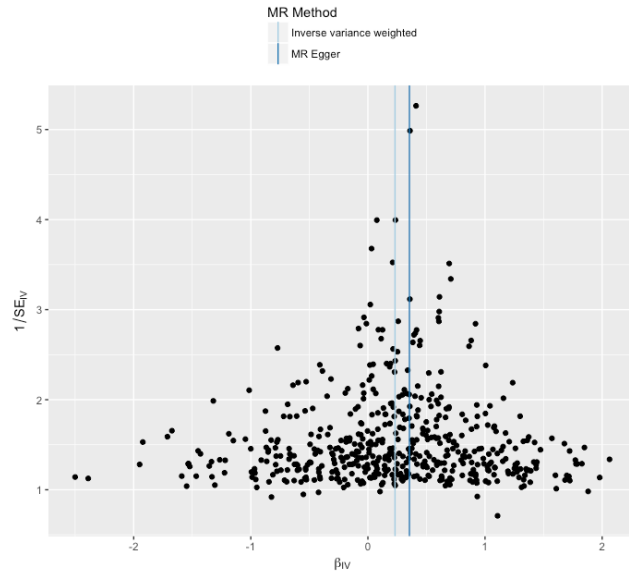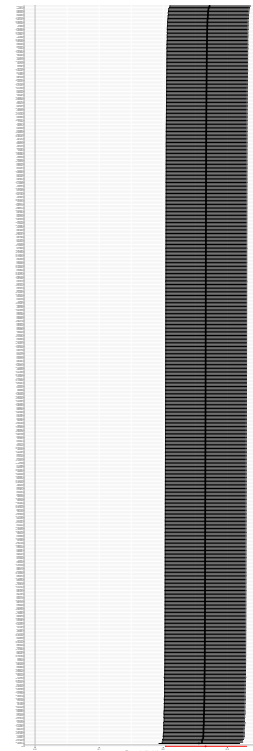

Supplement: NIHMS1504113-supplement-Supplement.pdf [file NIHMS1504113-supplement-Supplement.pdf]
